# Supplementary material for: Compositional variability of Mg/Ca, Sr/Ca, and Na/Ca in the deep-sea bivalve Acesta excavata (Fabricius, 1779)
Source: PLoS One. 2021 Apr 30;16(4):e0245605. doi: 10.1371/journal.pone.0245605 (PMC8087087; doi:10.1371/journal.pone.0245605)
Supplement: S2 Appendix — (XLSX) [file pone.0245605.s002.xlsx]

## Sheet: 1R
Distance from commissure [mm]	Mg/Ca [mmol/mol]	Na/Ca [mmol/mol]	Sr/Ca [mmol/mol]
1.316e-09	20.761	16.983	1.258
0.007	21.152	18.031	1.306
0.014	21.745	17.461	1.29
0.021	21.382	17.079	1.264
0.029	21.802	17.377	1.274
0.036	21.791	17.348	1.293
0.043	22.49	16.559	1.276
0.05	22.438	16.702	1.338
0.057	22.337	16.657	1.216
0.064	23.376	16.568	1.26
0.071	23.64	16.582	1.258
0.079	23.343	16.183	1.273
0.086	23.085	15.773	1.21
0.093	24.002	15.894	1.226
0.1	24.037	15.692	1.241
0.107	23.797	15.527	1.23
0.114	23.469	14.945	1.204
0.122	23.709	14.596	1.199
0.129	24.633	15.018	1.233
0.136	24.797	14.695	1.203
0.143	25.121	14.4	1.224
0.15	25.74	14.336	1.241
0.157	26.391	13.992	1.24
0.164	25.758	13.702	1.215
0.172	26.69	13.63	1.238
0.179	26.656	13.228	1.216
0.186	27.502	13.219	1.293
0.193	28.694	12.889	1.292
0.2	27.974	12.566	1.214
0.207	28.815	12.642	1.281
0.214	29.466	12.576	1.264
0.222	29.597	12.43	1.312
0.229	30.875	12.403	1.328
0.236	29.869	11.696	1.277
0.243	30.712	12.099	1.285
0.25	31.494	11.847	1.303
0.257	32.097	11.994	1.326
0.265	31.772	11.546	1.324
0.272	31.599	11.357	1.307
0.279	31.663	11.225	1.301
0.286	33.67	11.583	1.37
0.293	32.094	11.366	1.349
0.3	32.782	11.666	1.36
0.307	32.853	11.141	1.352
0.315	33.824	11.073	1.347
0.322	33.148	11.155	1.338
0.329	34.178	11.257	1.359
0.336	34.108	11.206	1.367
0.343	34.705	11.281	1.391
0.35	33.491	10.981	1.373
0.357	33.58	11.041	1.371
0.365	33.514	10.889	1.34
0.372	33.928	10.577	1.33
0.379	34.113	10.858	1.346
0.386	35.144	10.792	1.366
0.393	34.022	10.762	1.328
0.4	34.844	10.748	1.353
0.408	35.046	10.807	1.347
0.415	34.467	10.734	1.352
0.422	34.817	10.887	1.355
0.429	34.393	10.812	1.349
0.436	34.974	10.841	1.332
0.443	34.342	10.706	1.307
0.45	35.039	11.199	1.36
0.458	33.861	10.701	1.311
0.465	34.146	11.106	1.33
0.472	34.088	10.741	1.283
0.479	34.356	11.003	1.313
0.486	33.854	11.03	1.31
0.493	33.514	10.959	1.294
0.5	33.111	10.856	1.306
0.508	33.334	11.057	1.309
0.515	32.769	10.857	1.259
0.522	32.455	11.046	1.266
0.529	32.195	11.117	1.263
0.536	31.903	10.765	1.266
0.543	31.401	10.867	1.252
0.551	31.473	11.129	1.232
0.558	30.967	11.095	1.231
0.565	30.6	11.181	1.218
0.572	30.351	11.179	1.236
0.579	30.134	11.475	1.253
0.586	28.859	11.046	1.185
0.593	29.174	11.408	1.196
0.601	29.549	11.468	1.188
0.608	29.246	11.539	1.195
0.615	27.375	11.786	1.185
0.622	26.945	11.696	1.154
0.629	25.98	11.717	1.132
0.636	25.068	12.268	1.13
0.643	23.844	12.234	1.108
0.651	23.083	12.428	1.092
0.658	22.241	12.401	1.081
0.665	21.88	12.672	1.075
0.672	20.759	12.681	1.086
0.679	20.545	13.142	1.086
0.686	20.082	13.279	1.088
0.694	19.659	13.71	1.072
0.701	19.896	13.876	1.105
0.708	18.672	13.99	1.069
0.715	18.108	13.953	1.049
0.722	17.602	14.254	1.056
0.729	17.639	14.953	1.057
0.736	17.677	14.952	1.079
0.744	17.334	15.281	1.09
0.751	16.875	15.05	1.082
0.758	16.685	15.588	1.108
0.765	16.821	15.929	1.115
0.772	16.629	15.978	1.119
0.779	16.144	16.25	1.112
0.786	16.286	16.827	1.136
0.794	15.901	17.098	1.128
0.801	15.523	16.724	1.102
0.808	15.823	17.198	1.148
0.815	14.881	17.416	1.14
0.822	15.03	17.675	1.128
0.829	15.372	17.811	1.143
0.837	14.884	17.603	1.127
0.844	14.703	17.946	1.132
0.851	14.759	17.844	1.114
0.858	14.552	17.998	1.133
0.865	14.355	18.45	1.124
0.872	14.355	18.672	1.121
0.879	14.319	18.744	1.129
0.887	13.905	18.458	1.085
0.894	13.943	18.966	1.113
0.901	14.458	19.178	1.125
0.908	14.601	18.866	1.132
0.915	13.844	18.362	1.099
0.922	13.963	18.966	1.122
0.929	14.271	18.672	1.139
0.937	14.333	18.738	1.123
0.944	14.344	18.593	1.127
0.951	13.869	18.057	1.097
0.958	13.714	18.391	1.129
0.965	13.769	18.108	1.135
0.972	13.824	18.24	1.126
0.98	13.615	18.287	1.122
0.987	13.599	18.353	1.143
0.994	13.881	18.534	1.122
1.001	13.295	17.686	1.092
1.008	13.473	17.797	1.095
1.015	13.452	17.662	1.099
1.022	13.364	17.595	1.102
1.03	13.296	17.669	1.09
1.037	13.513	18.091	1.131
1.044	13.67	17.798	1.095
1.051	13.383	17.815	1.106
1.058	13.329	17.802	1.092
1.065	13.337	17.877	1.133
1.072	12.936	17.683	1.1
1.08	13.41	18.129	1.121
1.087	13.635	18.365	1.143
1.094	13.399	18.059	1.106
1.101	13.405	18.069	1.122
1.108	13.053	17.614	1.116
1.115	13.291	17.823	1.107
1.123	13.357	18.106	1.13
1.13	13.333	17.777	1.132
1.137	13.424	17.762	1.105
1.144	13.592	17.969	1.108
1.151	13.349	17.767	1.079
1.158	13.684	17.965	1.104
1.165	14.124	18.209	1.095
1.173	14.153	17.678	1.084
1.18	14.358	18.247	1.084
1.187	14.547	17.668	1.079
1.194	15.059	17.691	1.084
1.201	14.893	17.312	1.056
1.208	15.329	17.578	1.073
1.215	15.623	17.269	1.03
1.223	15.211	17.023	1.018
1.23	16.07	16.463	1.029
1.237	16.052	16.12	1.052
1.244	16.735	16.195	1.046
1.251	16.708	15.867	1.074
1.258	16.659	15.25	1.077
1.266	17.082	15.051	1.09
1.273	17.842	15.124	1.14
1.28	18.13	15.422	1.17
1.287	17.765	14.96	1.169
1.294	18.257	15.419	1.197
1.301	18.21	15.667	1.245
1.308	18.271	15.417	1.217
1.316	17.816	15.258	1.219
1.323	17.966	15.581	1.234
1.33	18.037	15.657	1.229
1.337	17.855	16.039	1.274
1.344	18.518	16.306	1.287
1.351	18.198	16.943	1.311
1.358	17.923	16.782	1.293
1.366	18.074	17.74	1.303
1.373	17.893	16.855	1.264
1.38	18.303	17.571	1.313
1.387	17.997	17.337	1.265
1.394	17.921	17.594	1.271
1.401	17.383	17.34	1.212
1.409	17.678	17.183	1.221
1.416	17.911	17.2	1.224
1.423	18.279	17.183	1.225
1.43	19.113	16.94	1.243
1.437	19.044	17.242	1.248
1.444	19.199	16.749	1.218
1.451	19.751	16.718	1.229
1.459	20.089	17.082	1.193
1.466	20.69	17.094	1.222
1.473	20.066	16.203	1.173
1.48	20.319	16.635	1.185
1.487	20.532	16.571	1.21
1.494	20.438	16.62	1.198
1.501	20.45	16.813	1.191
1.509	20.415	16.399	1.177
1.516	20.307	16.442	1.182
1.523	20.591	16.793	1.184
1.53	20.069	16.628	1.155
1.537	20.161	16.664	1.157
1.544	18.996	16.35	1.131
1.552	19.556	16.661	1.175
1.559	18.903	16.77	1.192
1.566	18.625	16.428	1.161
1.573	18.782	16.955	1.216
1.58	18.325	16.825	1.212
1.587	19.449	17.217	1.198
1.594	18.593	17.485	1.238
1.602	17.777	17.46	1.227
1.609	18.689	17.918	1.249
1.616	19.739	18.451	1.297
1.623	18.978	18.366	1.279
1.63	17.972	18.079	1.28
1.637	18.289	18.31	1.3
1.644	18.64	19.978	1.315
1.652	18.113	18.543	1.312
1.659	18.575	18.34	1.295
1.666	18.512	19.116	1.329
1.673	18.37	18.736	1.361
1.68	18.813	18.985	1.314
1.687	18.564	18.695	1.31
1.695	18.655	18.349	1.303
1.702	18.367	18.59	1.288
1.709	19.063	19.12	1.34
1.716	18.793	19.025	1.332
1.723	18.525	18.514	1.284
1.73	18.764	18.604	1.321
1.737	18.758	18.736	1.313
1.745	18.333	18.021	1.29
1.752	19.217	18.64	1.329
1.759	19.388	18.27	1.326
1.766	19.16	17.603	1.291
1.773	19.873	18.045	1.318
1.78	20.115	17.745	1.321
1.787	19.503	17.855	1.323
1.795	20.385	17.971	1.337
1.802	20.556	17.472	1.311
1.809	20.317	17.643	1.325
1.816	20.09	17.155	1.325
1.823	21.051	17.843	1.331
1.83	21.29	17.937	1.332
1.838	22.073	17.828	1.318
1.845	21.104	17.368	1.29
1.852	21.405	17.786	1.344
1.859	21.434	17.021	1.331
1.866	21.726	17.397	1.305
1.873	22.511	17.315	1.45
1.88	22.756	17.819	1.343
1.888	21.816	17.239	1.318
1.895	21.887	17.306	1.293
1.902	22.982	18.251	1.334
1.909	23.306	17.779	1.308
1.916	22.959	17.846	1.291
1.923	23.037	17.853	1.281
1.93	23.954	17.933	1.278
1.938	24.089	17.497	1.288
1.945	25.156	17.582	1.278
1.952	25.247	17.093	1.258
1.959	25.02	17.542	1.273
1.966	25.721	17.076	1.233
1.973	27.002	17.548	1.266
1.981	27.743	17.116	1.228
1.988	27.747	17.004	1.21
1.995	28.383	16.528	1.22
2.002	28.439	15.824	1.242
2.009	29.147	15.807	1.223
2.016	29.151	15.848	1.193
2.023	30.132	15.468	1.215
2.031	30.461	15.125	1.207
2.038	29.637	14.78	1.227
2.045	30.099	14.12	1.204
2.052	29.675	14.28	1.232
2.059	29.992	14.156	1.229
2.066	30.478	14.037	1.271
2.073	30.243	13.895	1.235
2.081	30.06	14.356	1.259
2.088	29.859	14.025	1.269
2.095	30.021	13.777	1.246
2.102	28.791	13.752	1.268
2.109	27.982	13.796	1.242
2.116	28.763	13.611	1.272
2.124	27.03	14.134	1.271
2.131	26.741	14.032	1.279
2.138	25.627	14.018	1.293
2.145	25.622	14.357	1.277
2.152	24.771	14.309	1.278
2.159	23.305	14.37	1.276
2.166	22.247	14.018	1.231
2.174	22.304	14.255	1.239
2.181	21.444	14.38	1.253
2.188	20.859	14.751	1.244
2.195	20.786	14.695	1.235
2.202	19.714	14.404	1.16
2.209	20.107	14.557	1.209
2.216	20.096	14.804	1.224
2.224	20.083	14.849	1.183
2.231	20.139	14.629	1.156
2.238	20.679	14.479	1.205
2.245	21.055	14.205	1.179
2.252	21.465	13.813	1.183
2.259	22.702	13.792	1.199
2.266	23.211	13.612	1.188
2.274	23.913	13.64	1.232
2.281	24.934	13.05	1.197
2.288	25.786	13.25	1.247
2.295	27.322	12.952	1.24
2.302	27.894	13.069	1.222
2.309	28.607	13.07	1.245
2.317	30.09	12.619	1.257
2.324	30.582	12.67	1.285
2.331	30.671	12.227	1.279
2.338	32.433	12.497	1.293
2.345	31.537	12.486	1.272
2.352	33.176	12.699	1.3
2.359	32.239	12.09	1.244
2.367	34.491	12.442	1.258
2.374	32.733	12.389	1.31
2.381	32.915	12.471	1.281
2.388	32.545	12.176	1.255
2.395	32.254	12.449	1.266
2.402	31.417	12.364	1.25
2.409	31.889	12.526	1.26
2.417	30.929	12.671	1.25
2.424	29.725	12.51	1.211
2.431	29.705	13.065	1.22
2.438	28.322	13.181	1.211
2.445	27.214	12.773	1.165
2.452	26.544	12.953	1.167
2.46	26.187	13.037	1.158
2.467	26.413	13.22	1.149
2.474	25.495	13.176	1.156
2.481	24.205	12.972	1.114
2.488	24.505	13.434	1.129
2.495	23.557	13.034	1.097
2.502	23.23	13.227	1.091
2.51	23.214	13.611	1.131
2.517	21.882	13.311	1.081
2.524	21.69	13.432	1.087
2.531	21.014	13.334	1.058
2.538	21.183	13.653	1.077
2.545	20.102	13.341	1.06
2.552	20.732	13.74	1.089
2.56	20.712	13.897	1.073
2.567	20.285	13.646	1.051
2.574	20.536	14.04	1.07
2.581	19.789	13.709	1.039
2.588	20.02	14.116	1.069
2.595	19.165	13.719	1.05
2.603	19.184	13.953	1.034
2.61	19.427	13.971	1.026
2.617	18.671	13.669	1.015
2.624	19.18	14.439	1.055
2.631	18.956	13.949	1.026
2.638	18.808	14.073	1.028
2.645	18.797	13.879	1.015
2.653	18.258	13.737	1.004
2.66	18.044	13.617	1.01
2.667	18.042	13.797	0.997
2.674	18.689	13.846	1.033
2.681	18.499	13.884	1.01
2.688	18.339	13.738	0.999
2.695	18.088	13.737	0.998
2.703	17.977	13.602	1.009
2.71	18.601	13.663	1.001
2.717	17.832	13.717	1.009
2.724	17.789	13.535	1.027
2.731	18.154	13.634	1.026
2.738	17.923	13.268	1.031
2.746	17.92	13.467	1.043
2.753	17.647	13.466	1.021
2.76	17.603	13.674	1.044
2.767	17.111	13.083	1.041
2.774	16.816	13.463	1.045
2.781	16.897	13.718	1.042
2.788	16.548	13.791	1.04
2.796	16.676	13.827	1.044
2.803	16.088	13.891	1.033
2.81	16.074	13.953	1.019
2.817	15.936	14.019	1.049
2.824	15.609	14.345	1.053
2.831	16.032	14.43	1.04
2.838	15.298	14.744	1.039
2.846	15.3	15.035	1.063
2.853	15.181	15.175	1.043
2.86	14.773	14.978	1.021
2.867	14.79	15.25	1.041
2.874	14.959	15.864	1.043
2.881	14.768	15.824	1.013
2.889	14.664	15.997	1.059
2.896	14.62	16.5	1.064
2.903	14.511	16.305	1.049
2.91	14.531	16.624	1.055
2.917	14.492	16.535	1.043
2.924	14.268	16.877	1.085
2.931	14.092	16.853	1.029
2.939	14.42	16.709	1.051
2.946	14.531	17.321	1.048
2.953	13.858	17.285	1.036
2.96	13.811	17.019	1.022
2.967	14.259	17.783	1.045
2.974	13.891	17.661	1.026
2.981	14.235	17.966	1.058
2.989	13.88	18.254	1.058
2.996	13.668	17.877	1.041
3.003	13.867	17.987	1.031
3.01	13.788	18.286	1.035
3.017	13.519	17.926	1.027
3.024	13.51	17.938	1.047
3.032	13.577	18.146	1.035
3.039	13.465	17.915	1.044
3.046	13.551	18.272	1.02
3.053	13.449	18.071	1.039
3.06	13.328	18.285	1.029
3.067	12.84	18.088	1
3.074	13.35	18.761	1.025
3.082	13.235	18.182	1.01
3.089	13.147	18.243	1.04
3.096	13.035	18.609	1.036
3.103	12.767	18.404	1.031
3.11	13.177	18.289	1.014
3.117	12.803	18.506	1.036
3.124	12.759	18.092	1.032
3.132	13.04	18.394	1.027
3.139	12.943	18.288	1.012
3.146	12.565	17.965	1.009
3.153	12.808	18.218	1.021
3.16	12.811	18.364	1.013
3.167	12.584	17.991	0.997
3.175	12.311	17.922	1
3.182	12.728	18.16	1.024
3.189	12.951	18.294	1.01
3.196	12.959	18.611	1.041
3.203	12.75	17.999	1.031
3.21	13.181	18.252	1.05
3.217	13.019	18.164	1.027
3.225	12.768	18.157	1.023
3.232	12.722	17.99	1.039
3.239	12.912	18.171	1.021
3.246	12.994	18.033	1.035
3.253	12.814	18.08	1.01
3.26	12.923	18.338	1.04
3.267	13.127	18.725	1.055
3.275	12.947	18.252	1.05
3.282	12.906	18.231	1.047
3.289	12.862	18.155	1.033
3.296	13.069	18.521	1.031
3.303	13.42	18.962	1.054
3.31	13.339	18.782	1.056
3.318	12.948	18.636	1.036
3.325	13.061	18.252	1.042
3.332	13.084	18.443	1.042
3.339	12.915	18.617	1.054
3.346	13.308	18.959	1.042
3.353	13.327	18.76	1.051
3.36	13.061	18.74	1.043
3.368	13.253	18.401	1.056
3.375	13.372	18.824	1.065
3.382	13.785	18.99	1.062
3.389	13.378	19.052	1.051
3.396	13.708	19.068	1.072
3.403	13.373	18.726	1.05
3.41	13.634	19.25	1.066
3.418	13.252	18.863	1.047
3.425	13.03	18.995	1.064
3.432	13.227	19.166	1.087
3.439	12.929	18.964	1.046
3.446	13.22	19.333	1.088
3.453	13.391	19.475	1.098
3.461	13.114	19.598	1.069
3.468	12.895	19.907	1.084
3.475	12.965	20.008	1.104
3.482	12.801	20.079	1.097
3.489	12.763	20.171	1.089
3.496	12.774	19.873	1.089
3.503	12.628	20.207	1.103
3.511	12.646	20.352	1.083
3.518	12.333	20.338	1.09
3.525	12.389	20.6	1.099
3.532	12.333	20.715	1.068
3.539	12.532	21.014	1.106
3.546	12.276	21.046	1.112
3.553	12.137	20.93	1.096
3.561	11.947	21.132	1.102
3.568	12.048	21.109	1.109
3.575	11.983	21.067	1.109
3.582	11.854	21.124	1.113
3.589	11.866	20.864	1.124
3.596	12.005	20.987	1.107
3.604	11.872	21.39	1.096
3.611	11.479	20.78	1.077
3.618	11.75	21.222	1.093
3.625	11.826	21.187	1.109
3.632	11.688	21.368	1.113
3.639	11.769	21.273	1.096
3.646	11.623	22.572	1.095
3.654	11.662	21.324	1.099
3.661	11.343	20.893	1.076
3.668	11.47	21.092	1.086
3.675	11.495	21.761	1.11
3.682	11.577	21.658	1.096
3.689	11.26	20.862	1.08
3.696	11.498	21.784	1.129
3.704	11.316	21.456	1.105
3.711	10.636	20.693	1.056
3.718	11.378	21.621	1.108
3.725	11.209	21.937	1.112
3.732	10.924	22.831	1.094
3.739	11.119	21.56	1.08
3.747	10.719	21.589	1.075
3.754	10.92	21.859	1.079
3.761	10.862	21.685	1.073
3.768	11.049	22.244	1.115
3.775	10.967	22.57	1.145
3.782	10.907	22.215	1.107
3.789	11.059	22.082	1.105
3.797	11.079	22.776	1.102
3.804	11.055	22.693	1.119
3.811	11.03	22.789	1.116
3.818	11.059	22.649	1.132
3.825	10.903	22.384	1.114
3.832	10.875	22.365	1.088
3.839	11.02	22.995	1.125
3.847	11.044	22.177	1.106
3.854	10.939	22.394	1.127
3.861	11.211	22.434	1.085
3.868	11.222	22.789	1.133
3.875	11.379	22.804	1.129
3.882	10.972	22.616	1.122
3.89	11.281	22.386	1.12
3.897	11.454	22.812	1.13
3.904	11.59	22.324	1.122
3.911	11.481	22.809	1.142
3.918	11.199	22.445	1.119
3.925	11.276	23.005	1.132
3.932	11.427	22.678	1.113
3.94	11.376	22.994	1.142
3.947	11.373	22.654	1.148
3.954	11.24	22.586	1.135
3.961	11.253	22.094	1.109
3.968	11.653	23.069	1.131
3.975	11.435	22.719	1.127
3.982	11.536	22.595	1.102
3.99	11.742	23.152	1.158
3.997	11.573	22.528	1.147
4.004	11.951	22.562	1.145
4.011	11.503	22.584	1.127
4.018	11.544	22.875	1.142
4.025	11.541	22.594	1.124
4.033	11.651	23.25	1.14
4.04	11.329	23	1.131
4.047	11.646	22.973	1.127
4.054	11.425	22.951	1.118
4.061	11.558	22.756	1.121
4.068	11.666	22.268	1.118
4.075	11.789	22.609	1.132
4.083	11.819	22.921	1.137
4.09	11.81	22.772	1.092
4.097	12.054	22.34	1.151
4.104	12.001	22.287	1.136
4.111	12.038	22.275	1.118
4.118	12.309	22.527	1.14
4.125	11.9	22.084	1.109
4.133	12.311	22.453	1.141
4.14	13.051	22.869	1.16
4.147	12.57	23.261	1.14
4.154	12.653	22.806	1.166
4.161	12.872	23.33	1.161
4.168	12.649	22.645	1.131
4.176	12.649	22.645	1.122
4.183	13.007	22.852	1.135
4.19	12.925	22.949	1.104
4.197	12.89	22.809	1.1
4.204	13.314	22.862	1.111
4.211	13.371	23.402	1.148
4.218	13.157	23.001	1.11
4.226	13.412	22.613	1.12
4.233	13.322	23.005	1.09
4.24	13.327	22.732	1.061
4.247	13.381	22.802	1.06
4.254	13.852	23.129	1.114
4.261	13.2	23.221	1.042
4.268	13.588	22.873	1.055
4.276	13.292	22.154	1.032
4.283	13.673	22.054	1.03
4.29	13.659	22.083	1.026
4.297	13.767	22.309	1.034
4.304	13.471	21.697	1.034
4.311	13.744	21.156	1.025
4.318	13.339	20.924	1.047
4.326	13.489	20.247	1.016
4.333	13.485	20.615	1.03
4.34	13.52	19.766	1.015
4.347	13.641	19.919	1.012
4.354	13.189	19.147	0.991
4.361	13.497	19.419	1.001
4.369	13.613	19.503	1.027
4.376	13.606	19.551	1.021
4.383	13.147	18.996	1.008
4.39	13.675	19.562	1.031
4.397	13.092	18.83	1.021
4.404	13.31	19.05	1.027
4.411	13.308	19.174	1.05
4.419	13.09	18.618	1.021
4.426	13.244	18.905	1.07
4.433	13.279	19.177	1.052
4.44	13.291	19.174	1.043
4.447	13.15	19.158	1.059
4.454	12.866	19.056	1.042
4.461	13.121	19.441	1.066
4.469	12.938	19.8	1.051
4.476	13.144	19.674	1.071
4.483	12.742	19.538	1.054
4.49	13.227	19.568	1.067
4.497	13.079	20	1.075
4.504	12.673	19.385	1.026
4.512	12.919	19.817	1.043
4.519	13.005	20.067	1.074
4.526	12.199	19.578	1.033
4.533	12.713	19.724	1.029
4.54	12.524	19.384	1.032
4.547	12.593	19.791	1.032
4.554	12.428	19.759	1.057
4.562	11.809	18.644	1.007
4.569	12.074	19.106	1.035
4.576	12.102	19.526	1.039
4.583	11.832	19.134	1.052
4.59	11.782	19.302	1.05
4.597	11.833	19.272	1.058
4.604	11.666	19.082	1.049
4.612	11.638	19.446	1.061
4.619	11.533	19.374	1.05
4.626	11.634	19.207	1.075
4.633	11.53	18.97	1.053
4.64	11.438	19.023	1.068
4.647	11.409	19.238	1.084
4.655	11.449	19.568	1.068
4.662	11.448	19.131	1.069
4.669	11.217	19.203	1.052
4.676	11.387	19.284	1.095
4.683	11.155	19.371	1.079
4.69	11.193	19.318	1.068
4.697	11.467	18.913	1.09
4.705	11.577	19.277	1.106
4.712	11.627	19.482	1.111
4.719	11.666	19.328	1.084
4.726	11.679	19.595	1.12
4.733	11.071	18.859	1.051
4.74	11.858	19.806	1.097
4.747	11.688	19.885	1.101
4.755	11.695	19.744	1.118
4.762	11.542	19.968	1.101
4.769	11.752	19.852	1.104
4.776	11.996	19.895	1.086
4.783	11.561	20.208	1.093
4.79	11.919	20.512	1.106
4.798	11.42	19.808	1.07
4.805	11.825	20.679	1.121
4.812	12.576	21.015	1.113
4.819	12.009	20.963	1.088
4.826	11.948	20.817	1.094
4.833	12.118	21.316	1.105
4.84	11.896	21.02	1.075
4.848	11.755	21.145	1.083
4.855	12.299	21.678	1.1
4.862	12.077	21.341	1.098
4.869	11.967	21.125	1.088
4.876	12.012	21.97	1.064
4.883	12.326	22.107	1.069
4.89	11.88	21.106	1.072
4.898	11.689	21.596	1.072
4.905	11.826	21.795	1.055
4.912	11.766	21.691	1.047
4.919	11.818	21.65	1.054
4.926	11.526	21.162	1.071
4.933	11.32	21.108	1.065
4.941	11.511	21.208	1.063
4.948	11.504	21.273	1.071
4.955	11.54	21.742	1.064
4.962	11.608	20.993	1.057
4.969	11.497	21.085	1.068
4.976	11.298	20.799	1.046
4.983	11.226	20.589	1.077
4.991	11.335	21.209	1.087
4.998	11.451	21.258	1.085
5.005	11.004	20.117	1.036
5.012	10.982	20.376	1.068
5.019	11.162	20.916	1.09
5.026	10.997	20.566	1.071
5.033	11.315	20.926	1.107
5.041	11.306	20.643	1.09
5.048	11.192	20.317	1.11
5.055	10.959	20.823	1.088
5.062	11.156	20.412	1.093
5.069	11.007	20.934	1.103
5.076	10.74	20.299	1.089
5.084	10.831	20.323	1.096
5.091	11.008	20.508	1.126
5.098	10.892	21.11	1.121
5.105	10.942	20.345	1.092
5.112	10.985	20.701	1.097
5.119	11.262	20.766	1.109
5.126	11.111	20.915	1.127
5.134	11.124	20.693	1.106
5.141	11.296	21.369	1.123
5.148	11.131	21.488	1.129
5.155	11.171	21.679	1.153
5.162	11.152	21.029	1.129
5.169	11.241	21.27	1.126
5.176	10.867	21.137	1.116
5.184	11.432	22.207	1.15
5.191	11.397	22.274	1.168
5.198	11.05	21.546	1.121
5.205	11.229	21.798	1.155
5.212	11.065	22.073	1.144
5.219	10.849	21.325	1.12
5.227	11.438	22.398	1.161
5.234	11.521	21.765	1.176
5.241	11.257	21.974	1.145
5.248	11.489	21.956	1.157
5.255	11.278	22.378	1.157
5.262	11.328	21.751	1.147
5.269	11.518	22.225	1.148
5.277	11.079	21.334	1.138
5.284	11.254	21.919	1.16
5.291	10.873	21.136	1.132
5.298	11.357	21.849	1.159
5.305	11.612	21.754	1.162
5.312	11.209	21.369	1.14
5.319	11.699	21.708	1.158
5.327	11.203	21.296	1.144
5.334	11.749	22.083	1.162
5.341	11.374	21.332	1.163
5.348	12.055	22.222	1.178
5.355	11.732	22.129	1.167
5.362	11.413	21.414	1.133
5.37	11.644	21.767	1.167
5.377	12.112	21.763	1.182
5.384	11.882	21.554	1.199
5.391	11.835	21.543	1.185
5.398	11.599	21.527	1.187
5.405	11.814	21.638	1.164
5.412	11.594	21.888	1.169
5.42	12.014	21.068	1.179
5.427	11.823	21.313	1.211
5.434	11.988	22.824	1.19
5.441	11.753	21.335	1.202
5.448	11.996	21.2	1.187
5.455	12.053	21.635	1.212
5.462	11.818	21.4	1.197
5.47	11.914	20.93	1.196
5.477	12.063	20.798	1.189
5.484	11.735	20.76	1.169
5.491	12.376	21.2	1.208
5.498	12.252	20.617	1.199
5.505	12.091	20.442	1.188
5.513	12.647	21.721	1.213
5.52	12.275	20.611	1.202
5.527	12.322	21.071	1.221
5.534	12.675	20.86	1.209
5.541	12.194	19.827	1.191
5.548	12.266	20.014	1.19
5.555	12.24	20.187	1.186
5.563	12.391	19.779	1.17
5.57	12.578	19.961	1.179
5.577	12.34	20.112	1.195
5.584	12.343	19.714	1.174
5.591	12.637	19.917	1.183
5.598	12.831	19.836	1.182
5.605	12.554	20.423	1.185
5.613	12.677	19.591	1.181
5.62	12.731	19.082	1.186
5.627	12.612	19.356	1.206
5.634	12.472	19.197	1.166
5.641	12.854	19.871	1.172
5.648	12.822	19.691	1.174
5.656	12.687	19.157	1.162
5.663	12.854	19.369	1.188
5.67	12.694	19.328	1.183
5.677	13.094	19.038	1.191
5.684	12.928	19.004	1.174
5.691	13.147	18.911	1.191
5.698	12.907	18.596	1.17
5.706	13.095	19.355	1.2
5.713	13.285	18.929	1.191
5.72	13.084	19.106	1.19
5.727	13.179	19.003	1.182
5.734	13.217	18.756	1.194
5.741	13.154	18.491	1.184
5.748	13.569	18.792	1.196
5.756	14.158	19.048	1.177
5.763	14.181	19.114	1.207
5.77	14.631	18.843	1.214
5.777	14.732	19.307	1.243
5.784	14.526	18.715	1.202
5.791	15.176	19.039	1.219
5.799	15.337	19.061	1.219
5.806	15.372	19.259	1.211
5.813	15.47	19.18	1.237
5.82	15.498	18.947	1.202
5.827	15.938	18.93	1.224
5.834	16.04	19.26	1.241
5.841	15.936	19.363	1.218
5.849	15.7	19.015	1.203
5.856	16.173	19.344	1.251
5.863	16.396	19.811	1.267
5.87	15.982	19.308	1.219
5.877	16.219	19.482	1.245
5.884	15.916	18.984	1.231
5.891	15.221	18.948	1.223
5.899	15.724	18.929	1.221
5.906	15.751	18.776	1.237
5.913	15.131	18.924	1.224
5.92	15.248	18.306	1.206
5.927	15.256	18.664	1.227
5.934	15.632	18.607	1.237
5.941	15.435	18.89	1.209
5.949	15.258	18.156	1.195
5.956	15.275	17.638	1.207
5.963	15.454	18.19	1.201
5.97	15.423	17.785	1.186
5.977	15.565	17.611	1.208
5.984	16.486	17.716	1.223
5.992	16.105	17.546	1.209
5.999	16.119	17.085	1.189
6.006	16.534	17.717	1.216
6.013	16.506	17.479	1.229
6.02	16.603	17.222	1.205
6.027	16.836	16.833	1.181
6.034	16.463	16.554	1.186
6.042	16.368	16.274	1.223
6.049	16.709	16.471	1.202
6.056	16.883	16.754	1.202
6.063	17.387	16.821	1.209
6.07	17.258	16.948	1.257
6.077	17.259	17.059	1.268
6.085	16.93	16.142	1.213
6.092	17.92	16.373	1.239
6.099	17.73	16.46	1.234
6.106	17.849	16.377	1.225
6.113	18.14	16.301	1.238
6.12	18.352	16.252	1.248
6.127	18.988	16.353	1.273
6.135	19.903	16.581	1.263
6.142	21.199	16.057	1.251
6.149	23.027	16.065	1.32
6.156	25.395	15.51	1.294
6.163	26.404	15.011	1.3
6.17	28.213	14.55	1.328
6.177	31.186	14.715	1.355
6.185	31.335	13.66	1.315
6.192	32.807	13.294	1.371
6.199	35.151	13.168	1.359
6.206	35.3	12.832	1.356
6.213	36.599	12.312	1.358
6.22	37.417	11.815	1.356
6.228	39.003	12.22	1.449
6.235	38.05	11.948	1.395
6.242	39.492	11.609	1.393
6.249	39.699	11.676	1.402
6.256	39.724	12.247	1.455
6.263	38.755	12.011	1.446
6.27	37.844	12.077	1.427
6.278	36.969	12.227	1.402
6.285	35.72	12.434	1.395
6.292	34.241	12.733	1.372
6.299	33.127	13.087	1.379
6.306	32.1	13.395	1.34
6.313	31.127	13.626	1.364
6.32	30.048	13.746	1.343
6.328	28.778	13.883	1.276
6.335	28.199	14.502	1.332
6.342	26.879	14.623	1.307
6.349	26.434	15.283	1.323
6.356	25.986	15.192	1.312
6.363	25.381	15.53	1.322
6.37	23.852	15.659	1.289
6.378	23.363	15.681	1.314
6.385	23.326	16.149	1.319
6.392	22.135	16.451	1.296
6.399	22.119	16.229	1.303
6.406	21.487	16.528	1.313
6.413	20.964	16.352	1.267
6.421	20.427	16.602	1.29
6.428	20.632	16.792	1.277
6.435	20.117	17.371	1.256
6.442	18.989	17.1	1.248
6.449	19.438	17.018	1.276
6.456	19.38	17.584	1.276
6.463	19.531	17.76	1.265
6.471	19.248	17.33	1.234
6.478	19.373	17.322	1.253
6.485	19.274	17.405	1.29
6.492	19.641	17.74	1.246
6.499	19.672	17.817	1.254
6.506	19.706	17.242	1.21
6.513	20.096	17.412	1.226
6.521	20.546	17.048	1.27
6.528	20.518	16.747	1.234
6.535	21.391	17.413	1.26
6.542	21.764	17.317	1.246
6.549	21.759	17.019	1.231
6.556	21.781	17.252	1.263
6.564	23.237	17.073	1.282
6.571	23.187	16.911	1.257
6.578	24.918	17.514	1.287
6.585	24.764	17.134	1.279
6.592	24.28	17.042	1.245
6.599	24.74	16.987	1.265
6.606	24.42	16.501	1.232
6.614	25.004	17.095	1.267
6.621	25.531	17.23	1.272
6.628	25.318	17.285	1.267
6.635	24.784	17.102	1.266
6.642	25.07	17.141	1.277
6.649	24.513	17.01	1.248
6.656	24.415	17.105	1.26
6.664	24.137	16.973	1.277
6.671	24.707	17.281	1.261
6.678	23.682	17.175	1.257
6.685	22.567	16.764	1.2
6.692	23.453	17.257	1.238
6.699	22.519	17.236	1.217
6.707	21.906	16.933	1.236
6.714	21.783	17.351	1.188
6.721	21.6	16.936	1.187
6.728	21.23	16.729	1.185
6.735	21.138	16.668	1.167
6.742	21.333	16.481	1.156
6.749	20.836	16.502	1.153
6.757	21.177	16.744	1.183
6.764	21.686	17.003	1.159
6.771	20.949	16.347	1.145
6.778	21.71	16.29	1.135
6.785	21.874	16.231	1.149
6.792	22.46	16.47	1.193
6.799	23.806	16.039	1.163
6.807	23.322	16.134	1.162
6.814	23.74	15.672	1.167
6.821	24.059	15.568	1.157
6.828	24.338	15.288	1.164
6.835	24.941	15.148	1.177
6.842	25.063	15.426	1.155
6.85	25.033	14.95	1.162
6.857	25.446	15.207	1.156
6.864	25.321	14.933	1.153
6.871	26.189	14.815	1.173
6.878	25.951	14.576	1.161
6.885	24.896	14.555	1.151
6.892	24.543	14.318	1.12
6.9	23.905	14.134	1.121
6.907	24.334	14.611	1.144
6.914	23.045	14.426	1.125
6.921	22.795	14.305	1.092
6.928	21.997	14.456	1.104
6.935	21.387	14.479	1.112
6.942	20.77	14.246	1.087
6.95	20.663	14.407	1.078
6.957	19.6	14.387	1.086
6.964	18.853	14.271	1.056
6.971	18.255	14.646	1.06
6.978	17.508	14.586	1.069
6.985	17.24	14.859	1.08
6.993	16.657	14.671	1.06
7	17.068	15.094	1.123
7.007	16.211	14.836	1.086
7.014	15.321	14.518	1.09
7.021	15.587	14.932	1.108
7.028	15.345	14.754	1.116
7.035	15.029	15.398	1.109
7.043	14.938	15.269	1.146
7.05	14.396	16.006	1.166
7.057	14.731	16.399	1.209
7.064	14.353	16.35	1.205
7.071	13.965	17.03	1.208
7.078	13.815	17.315	1.232
7.085	13.369	17.769	1.254
7.093	12.988	17.82	1.243
7.1	13.037	18.863	1.277
7.107	12.827	19.601	1.31
7.114	12.536	19.821	1.306
7.121	12.11	20.129	1.272
7.128	11.998	20.395	1.306
7.136	11.937	20.945	1.282
7.143	11.361	21.043	1.272
7.15	11.402	21.21	1.29
7.157	11.641	21.661	1.286
7.164	11.356	22.111	1.262
7.171	10.997	22.057	1.237
7.178	11.004	21.803	1.241
7.186	11.196	22.051	1.248
7.193	11.16	21.708	1.229
7.2	11.047	21.361	1.205
7.207	11.105	21.604	1.224
7.214	11.185	21.869	1.215
7.221	11.319	21.775	1.208
7.228	11.327	21.77	1.24
7.236	10.969	21.254	1.246
7.243	11.122	21.268	1.231
7.25	11.138	20.771	1.215
7.257	11.281	20.997	1.249
7.264	11.289	20.489	1.22
7.271	11.266	20.222	1.217
7.279	11.404	19.696	1.223
7.286	11.489	19.986	1.252
7.293	11.491	19.842	1.236
7.3	11.928	20.007	1.246
7.307	11.859	19.229	1.209
7.314	12.039	19.374	1.228
7.321	12.437	19.472	1.208
7.329	12.676	19.263	1.201
7.336	13.102	19.246	1.2
7.343	14.014	18.998	1.217
7.35	14.274	18.5	1.189
7.357	15.269	18.501	1.206
7.364	15.629	18.356	1.173
7.371	15.646	17.11	1.11
7.379	17.268	17.79	1.204
7.386	17.973	16.919	1.192
7.393	18.135	16.797	1.189
7.4	18.444	16.026	1.135
7.407	19.117	16.106	1.178
7.414	20.135	15.638	1.189
7.422	20.503	14.521	1.185
7.429	21.578	14.038	1.199
7.436	22.616	13.707	1.235
7.443	22.932	13.291	1.226
7.45	23.676	13.005	1.224
7.457	23.609	13.14	1.277
7.464	23.295	12.425	1.233
7.472	23.035	12.618	1.235
7.479	23.29	12.637	1.223
7.486	23.6	12.716	1.214
7.493	23.434	13.022	1.221
7.5	23.498	13.245	1.236
7.507	22.746	13.591	1.211
7.514	22.606	13.874	1.198
7.522	22.466	14.052	1.175
7.529	21.291	15.011	1.184
7.536	20.653	15.762	1.175
7.543	19.083	16.359	1.16
7.55	18.493	16.678	1.117
7.557	17.596	17.536	1.129
7.565	17.158	17.565	1.107
7.572	16.341	18.047	1.089
7.579	16.213	18.572	1.107
7.586	16.112	18.321	1.081
7.593	15.187	18.868	1.064
7.6	15.565	19.285	1.08
7.607	14.886	19.147	1.077
7.615	14.223	19.441	1.062
7.622	13.681	18.533	1.041
7.629	13.718	19.527	1.042
7.636	13.529	19.683	1.07
7.643	13.827	20.055	1.094
7.65	13.333	19.891	1.076
7.657	13.019	20.293	1.108
7.665	12.972	21.037	1.109
7.672	12.667	20.736	1.108
7.679	12.779	21.165	1.148
7.686	12.428	20.837	1.124
7.693	12.54	21.246	1.126
7.7	12.378	21.809	1.135
7.708	12.608	22.423	1.144
7.715	12.361	22.408	1.127
7.722	12.758	22.858	1.163
7.729	12.331	23.224	1.131
7.736	12.329	23.122	1.161
7.743	12.234	22.921	1.159
7.75	12.184	23.682	1.153
7.758	12.317	23.188	1.148
7.765	11.908	22.73	1.13
7.772	12.09	23.264	1.164
7.779	12.427	23.361	1.167
7.786	12.18	23.24	1.139
7.793	12.053	23.669	1.152
7.8	12.16	23.349	1.145
7.808	12.072	23.114	1.123
7.815	11.887	22.919	1.138
7.822	12.288	23.661	1.128
7.829	11.991	23.21	1.119
7.836	11.682	22.795	1.11
7.843	11.908	22.967	1.124
7.851	11.687	22.78	1.109
7.858	12.236	22.842	1.131
7.865	12.066	23.104	1.113
7.872	11.961	22.374	1.1
7.879	11.699	21.954	1.094
7.886	11.952	22.078	1.087
7.893	11.969	22.165	1.116
7.901	11.903	21.247	1.098
7.908	11.805	21.006	1.095
7.915	11.89	22.128	1.097
7.922	11.711	20.701	1.065
7.929	11.871	20.958	1.081
7.936	12.199	20.436	1.093
7.943	11.95	20.226	1.092
7.951	11.489	19.398	1.059
7.958	11.712	19.625	1.077
7.965	12.035	19.929	1.074
7.972	11.771	19.445	1.088
7.979	12.066	19.561	1.074
7.986	12.041	19.742	1.072
7.994	11.995	19.245	1.07
8.001	12.024	19.389	1.089
8.008	12.008	19.573	1.076
8.015	12.427	19.547	1.08
8.022	12.652	19.59	1.09
8.029	12.587	18.834	1.055
8.036	12.88	19.263	1.091
8.044	13.006	19.234	1.06
8.051	13.336	19.521	1.061
8.058	13.031	18.514	1.063
8.065	13.74	18.422	1.034
8.072	13.512	17.935	1.029
8.079	13.708	18.153	1.029
8.086	13.806	17.698	1.017
8.094	13.973	17.314	1.028
8.101	13.973	16.657	0.999
8.108	14.432	16.458	1.01
8.115	14.382	16.523	1.012
8.122	14.538	15.889	1.025
8.129	14.266	15.495	1.031
8.136	14.384	15.344	1.022
8.144	14.089	14.804	1.009
8.151	14.537	15.173	1.038
8.158	14.4	14.807	1.045
8.165	14.097	14.701	1.03
8.172	14.029	14.669	1.026
8.179	13.645	14.317	1.023
8.187	13.839	14.266	1.039
8.194	13.881	14.454	1.052
8.201	13.68	14.142	1.037
8.208	13.983	14.33	1.049
8.215	14.022	14.629	1.059
8.222	13.837	14.55	1.04
8.229	14.417	14.917	1.082
8.237	14.176	14.741	1.043
8.244	14.175	15.168	1.058
8.251	14.455	15.346	1.063
8.258	14.283	15.233	1.05
8.265	14.349	15.184	1.062
8.272	14.338	15.45	1.037
8.28	14.543	15.471	1.059
8.287	14.406	15.013	1.049
8.294	14.896	15.224	1.085
8.301	14	14.644	1.039
8.308	14.624	15.322	1.086
8.315	14.616	15.039	1.048
8.322	14.356	15.296	1.056
8.33	14.321	15.386	1.066
8.337	14.857	15.084	1.059
8.344	14.708	15.108	1.1
8.351	15.005	15.555	1.076
8.358	15.273	15.016	1.09
8.365	15.466	15.408	1.083
8.372	15.531	15.608	1.115
8.38	15.026	14.529	1.044
8.387	15.976	15.287	1.074
8.394	15.949	15.351	1.087
8.401	16.49	15.512	1.112
8.408	16.394	15.431	1.122
8.415	16.509	15.78	1.119
8.422	16.471	15.635	1.105
8.43	17.13	15.744	1.132
8.437	17.147	15.711	1.128
8.444	17.257	15.412	1.143
8.451	17.41	15.369	1.137
8.458	17.057	15.776	1.117
8.465	16.96	15.689	1.132
8.473	16.703	15.457	1.124
8.48	16.391	16.118	1.127
8.487	16.414	15.861	1.146
8.494	15.672	15.823	1.139
8.501	15.696	16.124	1.147
8.508	15.778	16.146	1.133
8.515	15.468	16.616	1.187
8.523	15.362	16.067	1.158
8.53	15.33	16.425	1.192
8.537	15.184	16.97	1.176
8.544	15.284	16.536	1.158
8.551	15	16.415	1.166
8.558	14.651	16.845	1.16
8.565	14.368	16.395	1.166
8.573	14.447	16.457	1.138
8.58	14.741	16.862	1.2
8.587	14.812	16.733	1.196
8.594	14.754	16.406	1.186
8.601	14.375	16.641	1.205
8.608	15.054	17.713	1.192
8.616	15.55	17.341	1.239
8.623	15.511	17.22	1.332
8.63	15.322	16.752	1.202
8.637	15.647	16.808	1.215
8.644	14.627	16.125	1.164
8.651	16.301	17.371	1.25
8.658	16.551	17.199	1.258
8.666	16.257	16.942	1.253
8.673	16.825	17.222	1.279
8.68	17.682	17.357	1.4
8.687	17.051	16.664	1.31
8.694	18.352	17.784	1.281
8.701	18.291	16.877	1.298
8.708	18.412	17.079	1.306
8.716	18.849	16.435	1.299
8.723	19.549	16.845	1.289
8.73	19.342	16.538	1.266
8.737	20.346	16.214	1.275
8.744	20.448	15.358	1.256
8.751	24.306	15.867	1.291
8.759	23.523	15.875	1.327
8.766	26.077	15.787	1.292
8.773	26.951	14.797	1.366
8.78	25.741	15.146	1.302
8.787	27.365	14.107	1.34
8.794	29.494	13.724	1.375
8.801	30.29	13.13	1.333
8.809	30.884	12.221	1.266
8.816	36.965	12.714	1.433
8.823	35.012	11.725	1.39
8.83	36.634	11.196	1.427
8.837	38.693	11.026	1.478
8.844	41.356	11.752	1.523
8.851	39.654	11.005	1.479
8.859	39.711	10.75	1.458
8.866	41.193	11.088	1.524
8.873	39.537	11.191	1.423
8.88	39.832	11.084	1.509
8.887	38.264	11.435	1.447
8.894	38.354	11.733	1.441
8.902	36.349	11.834	1.401
8.909	34.878	12.73	1.416
8.916	31.652	12.268	1.346
8.923	32.12	13.245	1.357
8.93	30.171	13.284	1.243
8.937	30.667	14.179	1.311
8.944	30.341	14.994	1.304
8.952	27.789	14.235	1.25
8.959	26.047	13.775	1.227
8.966	27.398	15.414	1.296
8.973	25.682	15.447	1.261
8.98	24.795	15.294	1.22
8.987	23.699	15.282	1.209
8.994	23.061	15.248	1.2
9.002	24.289	16.334	1.17
9.009	23.206	15.901	1.214
9.016	23.174	15.661	1.206
9.023	22.117	15.804	1.231
9.03	22.861	16.336	1.169
9.037	23.088	16.736	1.197
9.045	21.46	15.891	1.176
9.052	22.182	15.734	1.142
9.059	22.33	15.844	1.147
9.066	22.616	16.53	1.204
9.073	22.93	16.515	1.192
9.08	21.645	16.196	1.217
9.087	22.105	16.219	1.169
9.095	22.253	17.116	1.188
9.102	21.629	16.937	1.199
9.109	21.03	16.331	1.216
9.116	20.459	15.994	1.149
9.123	23.756	17.048	1.155
9.13	21.313	17.061	1.174
9.137	20.494	16.605	1.154
9.145	20.88	16.588	1.182
9.152	19.891	16.612	1.135
9.159	19.98	16.109	1.157
9.166	18.79	15.409	1.088
9.173	20.344	17.525	1.194
9.18	20.311	16.096	1.147
9.188	20.335	16.405	1.134
9.195	19.895	16.676	1.171
9.202	19.999	16.655	1.108
9.209	19.38	17.131	1.128
9.216	19.431	16.861	1.129
9.223	22.065	16.162	1.127
9.23	20.536	16.695	1.158
9.238	20.121	16.726	1.125
9.245	20.063	15.99	1.116
9.252	20.153	15.468	1.073
9.259	20.886	16.762	1.189
9.266	20.704	17.564	1.136
9.273	22.133	17.38	1.171
9.28	22.164	17.044	1.165
9.288	22.06	17.51	1.222
9.295	21.815	16.608	1.133
9.302	22.974	17.123	1.192
9.309	22.346	16.818	1.22
9.316	23.005	16.914	1.195
9.323	22.765	17.43	1.173
9.331	22.152	16.533	1.152
9.338	22.714	17.515	1.164
9.345	23.826	16.751	1.168
9.352	22.216	17.227	1.124
9.359	22.055	16.402	1.138
9.366	23.476	16.132	1.146
9.373	22.951	16.552	1.164
9.381	22.931	16.618	1.147
9.388	22.894	16.17	1.183
9.395	22.388	15.725	1.128
9.402	21.896	16.245	1.126
9.409	21.71	16.08	1.153
9.416	21.481	16.014	1.131
9.423	20.61	15.453	1.117
9.431	21.559	15.791	1.193
9.438	20.937	16.059	1.137
9.445	23.261	16.827	1.17
9.452	20.868	16.575	1.127
9.459	20.488	16.414	1.13
9.466	20.471	16.017	1.146
9.474	20.323	16.324	1.168
9.481	19.591	16.405	1.136
9.488	20.746	16.151	1.133
9.495	20.085	17.067	1.155
9.502	20.903	18.244	1.16
9.509	19.344	16.824	1.152
9.516	19.244	16.594	1.158
9.524	19.442	17.284	1.187
9.531	20.384	17.79	1.193
9.538	19.039	17.36	1.176
9.545	18.897	16.933	1.124
9.552	18.834	17.464	1.155
9.559	19.052	17.808	1.145
9.566	19.086	17.58	1.193
9.574	18.109	17.123	1.153
9.581	18.228	18.443	1.147
9.588	18.138	18.243	1.164
9.595	17.809	18.308	1.179
9.602	17.785	17.675	1.137
9.609	17.896	17.99	1.174
9.617	17.404	17.942	1.158
9.624	17.163	18	1.14
9.631	17.453	18.344	1.152
9.638	16.985	18.721	1.159
9.645	17.538	19.013	1.172
9.652	16.847	18.186	1.159
9.659	16.701	18.432	1.145
9.667	16.759	17.999	1.108
9.674	16.726	18.12	1.098
9.681	17.414	18.81	1.173
9.688	16.527	18.089	1.11
9.695	16.72	18.423	1.146
9.702	16.546	17.769	1.085
9.709	16.271	18.238	1.125
9.717	16.338	18.142	1.089
9.724	16.497	18.568	1.142
9.731	16.097	18.307	1.136
9.738	16.027	17.992	1.094
9.745	15.688	18.135	1.128
9.752	15.956	18.444	1.133
9.76	15.403	17.584	1.1
9.767	15.237	17.807	1.094
9.774	15.366	17.899	1.143
9.781	15.405	17.989	1.139
9.788	15.375	17.611	1.126
9.795	15.233	18.132	1.157
9.802	14.677	17.025	1.113
9.81	14.957	17.784	1.133
9.817	14.93	18.112	1.196
9.824	14.825	19.982	1.186
9.831	14.859	17.901	1.19
9.838	14.738	18.02	1.201
9.845	14.915	17.797	1.173
9.852	14.496	18.216	1.192
9.86	14.609	18.299	1.228
9.867	14.476	18.515	1.224
9.874	14.992	18.558	1.258
9.881	14.471	18.247	1.246
9.888	14.528	19.028	1.27
9.895	14.152	18.063	1.225
9.903	14.314	18.343	1.229
9.91	13.936	18.076	1.206
9.917	14.525	18.866	1.249
9.924	15.212	18.595	1.276
9.931	14.491	18.878	1.323
9.938	14.4	18.634	1.276
9.945	14.198	18.851	1.286
9.953	14.37	18.613	1.279
9.96	14.238	19.474	1.271
9.967	14.833	18.452	1.252
9.974	14.463	19.136	1.289
9.981	14.172	19.341	1.309
9.988	14.587	19.457	1.32
9.995	14.68	19.475	1.309
10.003	13.969	19.684	1.312
10.01	14.274	19.913	1.319
10.017	14.206	20.075	1.299
10.024	14.372	19.629	1.313
10.031	14.301	19.424	1.3
10.038	14.244	19.893	1.333
10.046	13.858	19.946	1.297
10.053	14.039	19.176	1.273
10.06	14.202	19.473	1.319
10.067	14.373	19.651	1.298
10.074	14.159	20.174	1.281
10.081	14.631	19.887	1.305
10.088	14.683	19.797	1.36
10.096	14.792	19.758	1.263
10.103	14.742	20.251	1.243
10.11	15.026	19.783	1.282
10.117	14.743	19.278	1.238
10.124	15.687	19.412	1.242
10.131	15.632	19.491	1.263
10.138	15.631	19.094	1.219
10.146	16.003	18.866	1.234
10.153	15.971	18.351	1.224
10.16	16.928	18.932	1.219
10.167	16.417	19.064	1.218
10.174	17.16	19.152	1.242
10.181	17.164	19.167	1.224
10.189	16.759	18.738	1.211
10.196	17.096	18.926	1.226
10.203	17.657	18.933	1.234
10.21	17.217	18.853	1.225
10.217	17.278	19.534	1.196
10.224	16.922	18.999	1.178
10.231	17.269	18.707	1.19
10.239	17.117	19.007	1.172
10.246	17.525	19.077	1.218
10.253	17.025	19.357	1.177
10.26	16.658	18.765	1.144
10.267	16.638	18.291	1.169
10.274	16.867	19.164	1.184
10.281	16.681	18.799	1.13
10.289	16.687	19.62	1.173
10.296	17.036	18.943	1.16
10.303	16.461	19.176	1.149
10.31	16.07	18.976	1.141
10.317	16.758	19.655	1.151
10.324	15.587	18.275	1.09
10.331	16.246	19.347	1.127
10.339	15.475	18.701	1.095
10.346	15.329	19.23	1.098
10.353	15.022	19.113	1.093
10.36	15.167	19.195	1.138
10.367	15.044	18.965	1.089
10.374	14.227	19.173	1.092
10.382	13.94	19.538	1.071
10.389	14.403	19.419	1.111
10.396	14.115	19.169	1.098
10.403	13.977	18.951	1.094
10.41	13.749	19.105	1.062
10.417	14.245	19.562	1.101
10.424	13.983	19.831	1.087
10.432	13.989	18.998	1.104
10.439	14.247	19.065	1.093
10.446	14.202	18.151	1.071
10.453	13.803	18.862	1.116
10.46	14.069	19.294	1.137
10.467	13.95	19.105	1.135
10.474	14.363	19.055	1.11
10.482	13.817	19.185	1.11
10.489	14.39	19.503	1.142
10.496	13.844	19.332	1.128
10.503	14.346	19.575	1.167
10.51	13.793	19.634	1.12
10.517	13.876	19.343	1.144
10.525	13.722	19.22	1.142
10.532	13.819	19.548	1.129
10.539	13.355	19.001	1.129
10.546	13.657	19.385	1.163
10.553	13.44	19.125	1.136
10.56	13.821	19.563	1.155
10.567	13.923	20.204	1.165
10.575	13.306	19.109	1.133
10.582	13.507	19.808	1.167
10.589	13.456	19.721	1.161
10.596	13.732	19.863	1.164
10.603	13.193	19.855	1.177
10.61	13.246	19.313	1.156
10.617	13.631	20.09	1.164
10.625	13.284	20.069	1.155
10.632	13.376	20.512	1.184
10.639	13.299	20.276	1.179
10.646	13.301	20.095	1.163
10.653	13.634	20.48	1.157
10.66	13.591	21.174	1.183
10.668	13.303	20.979	1.194
10.675	13.399	20.518	1.152
10.682	13.016	20.092	1.138
10.689	13.337	20.631	1.174
10.696	13.599	21.288	1.165
10.703	13.893	19.942	1.162
10.71	13.755	19.93	1.15
10.718	13.199	19.671	1.145
10.725	13.608	20.457	1.165
10.732	13.408	20.068	1.17
10.739	13.645	19.959	1.17
10.746	13.221	19.534	1.171
10.753	13.565	19.717	1.176
10.76	13.928	19.542	1.164
10.768	13.76	19.897	1.174
10.775	13.614	19.751	1.179
10.782	14.051	19.907	1.196
10.789	14.19	19.999	1.183
10.796	13.669	20.122	1.19
10.803	13.525	18.787	1.153
10.811	14.218	19.639	1.212
10.818	13.868	19.688	1.216
10.825	14.196	20.044	1.233
10.832	13.789	19.084	1.193
10.839	13.656	19.25	1.214
10.846	13.555	19.916	1.21
10.853	13.652	20.341	1.196
10.861	14.141	19.597	1.265
10.868	14.145	19.613	1.242
10.875	14.244	19.161	1.199
10.882	14.839	19.429	1.212
10.889	14.054	19.691	1.258
10.896	14.001	19.438	1.232
10.903	14.304	19.376	1.271
10.911	14.566	20.409	1.225
10.918	14.041	19.356	1.228
10.925	14.71	19.873	1.226
10.932	14.289	19.681	1.208
10.939	15.324	19.319	1.24
10.946	14.423	20.308	1.225
10.954	14.365	19.628	1.224
10.961	14.356	19.082	1.207
10.968	14.433	19.563	1.21
10.975	14.23	20.063	1.227
10.982	14.846	19.821	1.237
10.989	14.945	20.385	1.213
10.996	16.6	19.566	1.218
11.004	14.15	18.977	1.15
11.011	14.227	18.417	1.248
11.018	15.088	19.118	1.232
11.025	14.588	21.833	1.228
11.032	14.394	18.626	1.198
11.039	14.555	20.513	1.292
11.046	14.553	19.251	1.212
11.054	14.719	19.279	1.254
11.061	15.003	18.871	1.215
11.068	15.354	18.568	1.187
11.075	14.16	19.517	1.222
11.082	14.684	18.627	1.212
11.089	14.051	18.283	1.158
11.097	15.128	19.013	1.225
11.104	14.394	17.882	1.23
11.111	15.278	18.838	1.234
11.118	15.054	19.6	1.234
11.125	15.704	19.495	1.263
11.132	15.223	19.023	1.235
11.139	15.497	21.602	1.265
11.147	14.904	18.533	1.207
11.154	14.72	20.404	1.197
11.161	14.731	19.275	1.211
11.168	15.009	19.186	1.224
11.175	14.776	18.496	1.208
11.182	14.786	18.722	1.209
11.189	15.145	18.733	1.199
11.197	15.45	18.684	1.218
11.204	14.746	18.818	1.202
11.211	16.934	18.73	1.224
11.218	15.022	18.697	1.214
11.225	13.956	16.989	1.08
11.232	15.588	18.553	1.171
11.24	15.299	17.534	1.168
11.247	15.281	17.065	1.202
11.254	16.028	18.286	1.18
11.261	16.743	18.108	1.193
11.268	16.859	17.97	1.212
11.275	16.732	17.65	1.15
11.282	16.825	17.543	1.208
11.29	19.174	17.334	1.185
11.297	16.89	16.912	1.159
11.304	16.579	16.621	1.157
11.311	16.913	16.718	1.171
11.318	15.988	15.819	1.116
11.325	17.428	17.076	1.214
11.332	17.889	17.335	1.183
11.34	16.642	16.712	1.214
11.347	18.491	16.543	1.2
11.354	17.526	17.247	1.213
11.361	16.993	16.872	1.172
11.368	16.227	16.052	1.178
11.375	17.002	18.435	1.229
11.383	16.614	16.903	1.197
11.39	17.11	16.899	1.274
11.397	16.566	17.499	1.236
11.404	17.515	18.903	1.298
11.411	15.879	16.835	1.166
11.418	18.047	17.703	1.258
11.425	16.81	16.914	1.244
11.433	16.088	16.466	1.174
11.44	16.476	17.172	1.245
11.447	16.613	18.458	1.249
11.454	16.406	16.798	1.263
11.461	16.139	17.175	1.236
11.468	15.752	17.055	1.187
11.475	15.782	17.464	1.205
11.483	15.983	19.955	1.234
11.49	16.142	17.497	1.227
11.497	16.052	17.11	1.16
11.504	16.773	17.96	1.208
11.511	17.687	17.571	1.24
11.518	17.063	17.809	1.281
11.526	17.009	18.118	1.193
11.533	18.563	17.983	1.16
11.54	17.532	17.863	1.275
11.547	18.854	17.567	1.187
11.554	17.023	17.459	1.195
11.561	17.291	18.401	1.225
11.568	17.607	16.319	1.245
11.576	17.631	17.306	1.258
11.583	16.834	15.961	1.1
11.59	17.914	16.898	1.216
11.597	17.806	16.946	1.225
11.604	18.584	16.88	1.222
11.611	18.926	16.586	1.191
11.618	18.099	16.727	1.199
11.626	18.759	17.099	1.234
11.633	19.404	18.032	1.193
11.64	19.856	16.863	1.215
11.647	17.968	16.178	1.127
11.654	19.104	16.12	1.157
11.661	19.604	15.958	1.144
11.669	19.239	16.28	1.145
11.676	19.716	16.17	1.162
11.683	18.928	14.968	1.083
11.69	20.928	15.725	1.161
11.697	20.542	15.16	1.086
11.704	20.754	15.924	1.134
11.711	21.49	15.415	1.123
11.719	21.775	14.841	1.117
11.726	21.564	15.462	1.137
11.733	20.805	13.924	1.042
11.74	21.027	14.115	1.051
11.747	21.555	14.276	1.048
11.754	22.087	13.836	1.067
11.761	23.126	15.288	1.091
11.769	23.274	13.709	1.095
11.776	23.561	13.732	1.096
11.783	23.723	13.341	1.082
11.79	24.649	13.035	1.072
11.797	24.318	13.298	1.126
11.804	24.066	12.905	1.09
11.812	25.004	13.143	1.195
11.819	24.872	13.107	1.089
11.826	25.201	13.175	1.102
11.833	25.966	12.75	1.127
11.84	25.774	12.475	1.089
11.847	24.253	12.839	1.082
11.854	25.21	12.499	1.106
11.862	25.718	12.69	1.12
11.869	25.295	12.861	1.126
11.876	26.103	12.932	1.133
11.883	26.989	12.893	1.171
11.89	24.941	12.46	1.122
11.897	25.799	13.124	1.132
11.904	24.841	13.469	1.115
11.912	24.95	13.026	1.112
11.919	25.103	12.935	1.126
11.926	23.676	13.218	1.112
11.933	23.26	13.295	1.124
11.94	23.929	13.34	1.152
11.947	22.688	13.232	1.102
11.955	22.418	13.332	1.131
11.962	23.146	13.451	1.14
11.969	21.245	13.528	1.098
11.976	20.951	13.607	1.089
11.983	20.956	14.122	1.152
11.99	20.081	13.775	1.072
11.997	19.488	14.238	1.083
12.005	18.787	14.441	1.059
12.012	19.403	14.388	1.133
12.019	18.72	14.468	1.097
12.026	18.1	14.616	1.097
12.033	18.294	14.206	1.136
12.04	17.992	15.323	1.118
12.047	17.61	14.944	1.103
12.055	16.783	15.22	1.083
12.062	16.591	14.455	1.077
12.069	16.426	14.71	1.115
12.076	16.145	15.452	1.145
12.083	16.345	15.629	1.129
12.09	16.302	15.704	1.127
12.098	16.062	15.635	1.115
12.105	15.999	15.566	1.103
12.112	15.076	15.591	1.111
12.119	15.29	15.747	1.111
12.126	14.821	16.448	1.105
12.133	14.501	16.304	1.11
12.14	14.786	16.145	1.11
12.148	14.499	16.925	1.111
12.155	14.686	15.817	1.094
12.162	14.826	17.134	1.111
12.169	14.755	16.612	1.154
12.176	15.332	16.231	1.142
12.183	14.208	17.132	1.109
12.19	14.508	17.041	1.114
12.198	14.379	17.055	1.119
12.205	14.473	16.169	1.114
12.212	14.162	16.13	1.11
12.219	13.86	15.439	1.044
12.226	14.278	15.888	1.093
12.233	14.811	15.73	1.121
12.241	14.716	15.527	1.111
12.248	14.645	15.131	1.035
12.255	16.359	16.214	1.131
12.262	15.021	15.365	1.054
12.269	15.238	15.952	1.08
12.276	15.38	15.384	1.141
12.283	16.202	17.498	1.05
12.291	15.985	15.309	1.092
12.298	16.424	15.249	1.126
12.305	16.232	15.45	1.081
12.312	16.529	15.099	1.072
12.319	17.176	15.448	1.084
12.326	17.405	14.98	1.048
12.333	16.615	15.38	1.057
12.341	16.608	16.81	1.09
12.348	17.267	15.144	1.111
12.355	17.274	14.78	1.092
12.362	17.439	14.629	1.12
12.369	18.054	15.173	1.061
12.376	18.15	14.719	1.066
12.383	18.655	14.74	1.074
12.391	17.976	13.983	1.039
12.398	17.729	13.944	1.032
12.405	18.462	14.281	1.029
12.412	19.723	14.118	1.098
12.419	19.461	13.977	1.101
12.426	19.923	14.24	1.065
12.434	19.327	12.944	0.992
12.441	20.347	13.48	1.113
12.448	20.595	13.768	1.063
12.455	19.744	13.05	1.027
12.462	21.159	13.139	1.092
12.469	20.715	12.771	1.064
12.476	21.292	13.054	1.08
12.484	20.837	12.906	1.049
12.491	22.747	13.203	1.149
12.498	21.789	12.997	1.059
12.505	22.383	13.233	1.097
12.512	21.92	13.274	1.086
12.519	21.755	13.506	1.078
12.526	21.716	13.262	1.149
12.534	23.032	13.54	1.104
12.541	22.693	13.136	1.132
12.548	21.85	13.224	1.103
12.555	22.155	13.129	1.091
12.562	21.938	13.699	1.177
12.569	23.43	14.852	1.141
12.577	21.812	14.212	1.103
12.584	22.411	13.182	1.078
12.591	21.27	13.384	1.09
12.598	20.853	13.656	1.107
12.605	20.862	13.765	1.102
12.612	20.601	13.97	1.088
12.619	20.884	14.082	1.108
12.627	21.469	14.493	1.098
12.634	21.427	14.043	1.072
12.641	21.111	14.977	1.184
12.648	20.761	14.502	1.108
12.655	20.614	14.846	1.162
12.662	20.108	14.291	1.114
12.669	20.798	14.772	1.123
12.677	20.108	14.196	1.109
12.684	19.501	14.577	1.084
12.691	19.486	14.98	1.155
12.698	20.573	16.796	1.207
12.705	19.65	15.364	1.161
12.712	18.713	16.297	1.151
12.72	21.181	15.845	1.139
12.727	18.847	15.194	1.15
12.734	17.735	14.669	1.092
12.741	18.617	15.469	1.141
12.748	17.928	15.601	1.14
12.755	17.73	15.349	1.142
12.762	17.423	14.464	1.098
12.77	17.897	15.533	1.153
12.777	17.525	15.726	1.225
12.784	16.752	15.137	1.126
12.791	17.965	15.669	1.195
12.798	18.575	16.105	1.192
12.805	17.537	16.168	1.213
12.812	17.689	16.804	1.21
12.82	17.743	16.029	1.148
12.827	16.912	16.095	1.215
12.834	15.055	14.232	1.067
12.841	17.65	16.633	1.131
12.848	17.172	16.242	1.148
12.855	17.011	16.162	1.135
12.863	18.332	16.355	1.152
12.87	16.261	15.602	1.077
12.877	16.617	15.886	1.106
12.884	17.215	16.947	1.217
12.891	17.116	16.386	1.124
12.898	17.625	16.075	1.153
12.905	16.767	17.022	1.131
12.913	16.408	16.291	1.112
12.92	18.014	16.014	1.127
12.927	17.115	15.924	1.109
12.934	16.839	17.188	1.121
12.941	18.552	17.602	1.134
12.948	17.359	15.391	1.12
12.955	17.161	15.93	1.11
12.963	17.804	17.232	1.194
12.97	18.376	15.712	1.12
12.977	18.393	16.118	1.132
12.984	18.609	16.826	1.175
12.991	18.981	15.93	1.158
12.998	17.91	16.204	1.142
13.006	18.051	16.932	1.167
13.013	18.689	16.905	1.195
13.02	18.93	16.63	1.22
13.027	18.505	17.082	1.191
13.034	18.163	16.725	1.16
13.041	18.289	16.574	1.196
13.048	20.412	16.053	1.218
13.056	17.723	16.997	1.179
13.063	17.812	17.126	1.207
13.07	17.734	16.207	1.199
13.077	18.51	17.249	1.223
13.084	18.722	16.772	1.232
13.091	18.027	17.348	1.246
13.098	17.752	18.195	1.209
13.106	17.552	17.096	1.202
13.113	18.521	18.75	1.222
13.12	17.897	17.888	1.236
13.127	21.878	17.357	1.25
13.134	18.133	17.754	1.229
13.141	19.24	18.59	1.256
13.149	17.989	18.697	1.247
13.156	17.393	18.371	1.294
13.163	19.384	18.266	1.259
13.17	17.206	18.682	1.275
13.177	17.529	17.204	1.215
13.184	18.606	19.161	1.241
13.191	17.245	18.525	1.304
13.199	17.305	19.168	1.202
13.206	16.191	17.248	1.164
13.213	17.997	19.584	1.37
13.22	17.023	18.771	1.211
13.227	17.096	19.364	1.226
13.234	17.852	18.973	1.325
13.241	15.894	18.033	1.153
13.249	17.336	18.997	1.222
13.256	17.471	19.82	1.271
13.263	16.916	18.363	1.185
13.27	16.237	17.384	1.173
13.277	16.381	19.41	1.232
13.284	16.092	18.209	1.233
13.292	16.061	18.463	1.227
13.299	16.667	17.634	1.193
13.306	16.932	17.975	1.212
13.313	16.219	18.514	1.265
13.32	16.163	18.001	1.244
13.327	17.549	18.092	1.218
13.334	16.081	18.025	1.235
13.342	16.652	19.201	1.249
13.349	16.79	18.506	1.188
13.356	15.871	18.797	1.256
13.363	15.758	19.013	1.188
13.37	16.083	19.097	1.223
13.377	15.933	19.196	1.226
13.384	15.432	18.174	1.273
13.392	16.466	19.796	1.258
13.399	16.377	18.353	1.231
13.406	16.723	21.744	1.257
13.413	16.225	18.897	1.266
13.42	15.343	18.643	1.294
13.427	15.188	18.441	1.221
13.435	15.384	18.471	1.232
13.442	15.265	18.382	1.236
13.449	16.052	19.319	1.29
13.456	15.757	19.063	1.3
13.463	16.655	19.909	1.263
13.47	15.071	19.171	1.291
13.477	15.77	19.808	1.172
13.485	15.54	19.29	1.296
13.492	15.62	18.45	1.253
13.499	16.444	21.375	1.415
13.506	16.126	19.585	1.328
13.513	15.589	19.437	1.277
13.52	15.606	19.514	1.341
13.527	14.907	18.978	1.234
13.535	15.98	22.793	1.28
13.542	15.268	21.208	1.401
13.549	15.805	19.807	1.324
13.556	15.591	20.943	1.305
13.563	15.676	20.594	1.285
13.57	15.267	19.401	1.362
13.578	15.412	18.799	1.221
13.585	15.279	17.95	1.37
13.592	17.359	18.941	1.375
13.599	16.595	19.8	1.33
13.606	17.576	18.291	1.416
13.613	15.645	19.172	1.338
13.62	16.967	19.242	1.253
13.628	17.328	22.103	1.345
13.635	17.762	21.245	1.307
13.642	17.319	19.641	1.399
13.649	17.073	19.307	1.376
13.656	17.321	18.889	1.299
13.663	19.428	19.323	1.318
13.67	17.873	19.359	1.274
13.678	16.113	17.639	1.181
13.685	17.993	19.724	1.329
13.692	16.624	17.764	1.195
13.699	17.046	17.933	1.152
13.706	18.135	19.5	1.251
13.713	17.979	18.29	1.216
13.721	17.629	17.786	1.21
13.728	17.751	19.256	1.216
13.735	19.2	20.217	1.264
13.742	17.933	18.453	1.207
13.749	18.549	21.64	1.275
13.756	17.869	18.629	1.161
13.763	18.589	18.426	1.216
13.771	17.716	18.147	1.223
13.778	18.242	17.502	1.172
13.785	19.192	18.772	1.161
13.792	20.834	17.979	1.192
13.799	19.688	18.958	1.158
13.806	20.445	17.108	1.182
13.813	21.018	17.262	1.126
13.821	20.664	17.392	1.192
13.828	19.295	16.961	1.095
13.835	19.716	16.702	1.235
13.842	19.494	15.816	1.138
13.849	21.143	16.782	1.16
13.856	21.83	14.791	1.067
13.864	21.142	16.158	1.125
13.871	20.734	14.286	1.066
13.878	20.158	16.051	1.154
13.885	19.921	14.101	1.125
13.892	19.518	16.976	1.103
13.899	21.746	15.358	1.15
13.906	20.214	15.808	1.18
13.914	20.922	14.582	1.132
13.921	20.234	15.628	1.166
13.928	20.355	15.358	1.101
13.935	19.913	14.463	1.121
13.942	21.725	15.246	1.254
13.949	18.932	14.993	1.238
13.956	19.6	15.982	1.231
13.964	19.412	14.963	1.239
13.971	18.771	16.212	1.229
13.978	18.511	15.55	1.272
13.985	19.422	15.657	1.258
13.992	19.432	17.018	1.42
13.999	18.648	17.552	1.202
14.006	19.055	16.479	1.266
14.014	20.177	18.925	1.288
14.021	18.178	18.086	1.203
14.028	20.208	18.665	1.312
14.035	18.943	19.179	1.484
14.042	17.84	18.747	1.296
14.049	17.812	18.996	1.345
14.057	17.45	18.098	1.295
14.064	17.078	18.314	1.307
14.071	19.358	19.675	1.412
14.078	16.378	17.827	1.145
14.085	16.275	16.226	1.078
14.092	17.351	19.78	1.377
14.099	19.476	19.572	1.385
14.107	17.619	18.921	1.288
14.114	16.729	18.042	1.263
14.121	17.167	19.137	1.286
14.128	16.707	20.586	1.38
14.135	18.212	18.583	1.301
14.142	15.844	19.388	1.297
14.15	17.172	21.08	1.364
14.157	16.695	20.696	1.426
14.164	16.476	20.365	1.532
14.171	17.286	20.58	1.371
14.178	17.377	21.421	1.352
14.185	16.829	21.149	1.374
14.192	16.159	20.572	1.497
14.2	16.08	19.877	1.398
14.207	15.896	20.293	1.356
14.214	16.506	21.746	1.448
14.221	16.831	22.958	1.428
14.228	16.524	21.793	1.337
14.235	15.27	21.974	1.474
14.242	15.541	21.513	1.424
14.25	15.082	21.774	1.379
14.257	14.803	20.006	1.348
14.264	15.186	20.816	1.483
14.271	15.367	21.713	1.369
14.278	14.551	21.435	1.298
14.285	15.404	22.202	1.412
[truncated: 518 more rows]

## Sheet: 6R
Distance from commissure [mm]	Mg/Ca [mmol/mol]	Na/Ca [mmol/mol]	Sr/Ca [mmol/mol]
6.104e-10	27.561	11.89	1.317
0.007	27.163	11.951	1.27
0.014	26.53	11.979	1.255
0.021	25.481	11.678	1.219
0.029	26.159	12.197	1.241
0.036	24.312	12.298	1.269
0.043	24.653	12.162	1.178
0.05	23.208	12.306	1.151
0.057	22.991	12.298	1.135
0.064	22.366	12.747	1.126
0.072	21.569	11.881	1.081
0.079	22.326	12.953	1.141
0.086	21.944	12.583	1.135
0.093	21.424	12.868	1.173
0.1	21.137	12.641	1.156
0.107	20.591	12.878	1.16
0.114	20.603	13.037	1.119
0.122	20.553	12.638	1.132
0.129	19.046	12.266	1.086
0.136	19.711	12.406	1.127
0.143	18.39	13.241	1.111
0.15	19.512	12.224	1.108
0.157	18.368	12.754	1.106
0.164	17.952	12.423	1.101
0.172	17.873	13.053	1.091
0.179	17.791	13.213	1.137
0.186	18.065	13.143	1.129
0.193	17.774	13.106	1.149
0.2	17.041	12.905	1.122
0.207	16.819	12.937	1.092
0.214	17.742	14.006	1.173
0.222	17.731	13.378	1.153
0.229	17.251	13.867	1.175
0.236	17.646	13.495	1.16
0.243	17.503	13.832	1.192
0.25	17.324	14.263	1.18
0.257	18.374	14.762	1.225
0.265	17.537	14.294	1.213
0.272	17.545	14.168	1.276
0.279	17.22	14.559	1.225
0.286	16.518	14.569	1.202
0.293	17.02	15.491	1.22
0.3	18.315	15.334	1.276
0.307	18.665	16.112	1.285
0.315	17.246	15.618	1.267
0.322	17.404	15.853	1.257
0.329	17.034	15.197	1.23
0.336	18.4	16.575	1.327
0.343	17.858	17.14	1.262
0.35	17.902	16.89	1.282
0.357	16.929	15.829	1.177
0.365	17.575	16.291	1.251
0.372	17.98	16.805	1.219
0.379	17.637	16.303	1.315
0.386	17.335	16.038	1.225
0.393	16.993	15.614	1.233
0.4	17.226	15.89	1.207
0.408	17.263	16.214	1.244
0.415	17.696	16.726	1.251
0.422	17.213	16.128	1.219
0.429	16.54	15.651	1.177
0.436	17.949	16.221	1.201
0.443	16.505	15.76	1.147
0.45	16.802	15.64	1.206
0.458	16.22	16.033	1.193
0.465	16.617	15.529	1.133
0.472	16.204	15.457	1.129
0.479	15.545	15.09	1.137
0.486	16.6	15.751	1.187
0.493	15.765	15.09	1.156
0.5	14.854	14.846	1.139
0.508	15.433	15.476	1.127
0.515	15.045	14.607	1.11
0.522	15.763	15.044	1.141
0.529	14.685	14.482	1.099
0.536	15.581	14.697	1.108
0.543	15.211	14.333	1.098
0.551	15.183	14.79	1.166
0.558	14.773	14.424	1.107
0.565	15.082	14.759	1.112
0.572	14.586	14.532	1.107
0.579	14.72	14.358	1.129
0.586	14.625	14.704	1.107
0.593	15.227	14.74	1.109
0.601	15.552	14.865	1.152
0.608	14.642	14.611	1.172
0.615	15.51	14.57	1.127
0.622	15.291	14.696	1.178
0.629	14.992	14.414	1.101
0.636	15.892	14.85	1.137
0.643	15.89	15.205	1.169
0.651	15.43	14.456	1.141
0.658	15.127	14.891	1.118
0.665	15.999	14.936	1.165
0.672	15.214	14.796	1.158
0.679	15.425	14.973	1.187
0.686	16.093	15.328	1.178
0.694	15.659	15.087	1.168
0.701	15.714	15.025	1.144
0.708	15.691	15.439	1.149
0.715	15.489	15.119	1.158
0.722	16.163	15.965	1.199
0.729	15.692	15.092	1.159
0.736	15.677	15.321	1.188
0.744	15.602	15.039	1.166
0.751	16.146	15.048	1.205
0.758	15.305	15.009	1.164
0.765	15.402	14.721	1.182
0.772	14.964	15.317	1.162
0.779	14.86	14.78	1.164
0.786	15.621	15.042	1.178
0.794	15.584	14.556	1.182
0.801	15.145	15.022	1.169
0.808	15.213	15.078	1.206
0.815	15.176	14.619	1.188
0.822	15.531	14.814	1.201
0.829	15.155	14.61	1.164
0.837	14.864	14.199	1.241
0.844	15.354	14.923	1.192
0.851	16.078	15.748	1.234
0.858	16.049	14.823	1.232
0.865	16.02	15.203	1.247
0.872	15.891	14.988	1.242
0.879	16.329	15.527	1.236
0.887	16.272	15.227	1.24
0.894	15.586	15.421	1.221
0.901	16.166	15.083	1.217
0.908	15.709	15.303	1.251
0.915	15.764	15.268	1.223
0.922	16.134	16.017	1.29
0.929	15.795	16.141	1.257
0.937	15.965	16.035	1.284
0.944	15.781	15.516	1.25
0.951	15.225	15.64	1.241
0.958	15.427	15.647	1.299
0.965	15.662	16.369	1.296
0.972	15.945	16.314	1.288
0.98	16.041	16.413	1.347
0.987	15.335	15.687	1.281
0.994	16.574	16.275	1.318
1.001	15.987	16.936	1.305
1.008	16.031	16.543	1.317
1.015	16.094	16.157	1.313
1.022	17.011	16.403	1.318
1.03	17.007	16.925	1.354
1.037	17.344	16.742	1.322
1.044	17.333	16.733	1.31
1.051	17.312	16.698	1.308
1.058	17.362	16.092	1.302
1.065	18.309	16.695	1.34
1.072	18.508	16.565	1.308
1.08	18.249	16.536	1.31
1.087	18.308	16.321	1.31
1.094	18.391	16.432	1.302
1.101	18.101	16.249	1.284
1.108	18.655	16.324	1.259
1.115	18.836	16.212	1.292
1.123	18.667	15.804	1.244
1.13	19.193	16.296	1.313
1.137	19.491	15.897	1.297
1.144	19.135	16.044	1.293
1.151	19.492	16.646	1.279
1.158	19.712	16.722	1.352
1.165	19.942	16.847	1.371
1.173	20.154	16.692	1.35
1.18	21.105	17.132	1.426
1.187	20.903	17.44	1.381
1.194	21.602	18.311	1.469
1.201	22.108	18.071	1.496
1.208	23.433	18.18	1.454
1.215	22.355	20.145	1.528
1.223	22.311	18.255	1.54
1.23	22.405	18.754	1.5
1.237	22.807	18.815	1.494
1.244	24.533	18.946	1.499
1.251	26.305	19.299	1.503
1.258	25.326	20.043	1.505
1.266	25.079	20.662	1.573
1.273	24.005	20.133	1.52
1.28	23.333	19.519	1.512
1.287	24.742	20.541	1.548
--	24.553	21.708	1.597	Crack in the shell filled with secondary material
--	23.485	20.625	1.538
--	22.397	19.403	1.524
--	24.763	21.741	1.677
--	27.66	22.839	1.658
--	29.667	25.726	1.713
--	36.24	29.501	1.63
--	55.479	28.112	1.745
--	98.944	39.262	1.63
--	177.838	64.932	1.711
--	305.613	81.033	2.267
--	311.959	75.991	1.859
--	581.32	113.113	3.211
--	64.479	17.418	0.839
--	283.897	49.81	2.361
--	201.314	39.689	2.488
--	117.628	23.111	1.536
--	98.883	19.552	1.565
--	81.963	18.449	1.539
--	66.123	16.461	1.546
--	59.385	13.11	1.683
--	29.41	12.54	1.552
--	24.051	12.35	1.515
--	23.828	12.309	1.567
--	22.551	11.628	1.49
1.473	22.874	11.533	1.46
1.48	23.741	11.991	1.492
1.487	22.937	12.071	1.455
1.494	23.506	12.33	1.489
1.501	22.853	12.336	1.436
1.509	23.172	12.779	1.449
1.516	22.823	13.249	1.447
1.523	22.653	13.336	1.431
1.53	21.123	13.188	1.391
1.537	21.549	14.111	1.432
1.544	20.432	14.388	1.368
1.552	19.138	14.872	1.364
1.559	17.918	14.969	1.309
1.566	17.906	15.679	1.307
1.573	17.088	15.917	1.282
1.58	16.459	16.296	1.296
1.587	15.441	16.063	1.272
1.594	15.462	16.424	1.285
1.602	14.993	16.725	1.274
1.609	14.365	16.474	1.214
1.616	14.606	16.61	1.269
1.623	13.877	16.791	1.233
1.63	14.169	16.999	1.268
1.637	14.013	17.18	1.249
1.644	13.767	17.096	1.271
1.652	13.629	17.261	1.284
1.659	13.386	17.434	1.303
1.666	13.346	16.802	1.283
1.673	13.092	17.606	1.308
1.68	13.191	17.425	1.306
1.687	12.617	17.177	1.273
1.695	12.423	16.576	1.25
1.702	12.43	17.007	1.271
1.709	12.53	16.719	1.302
1.716	12.393	16.211	1.255
1.723	12.308	16.291	1.251
1.73	12.298	15.751	1.284
1.737	12.799	15.688	1.239
1.745	12.38	15.165	1.248
1.752	12.58	14.807	1.242
1.759	12.753	14.919	1.264
1.766	12.636	15.091	1.226
1.773	12.805	13.902	1.184
1.78	12.482	13.841	1.166
1.787	13.003	13.587	1.201
1.795	13.473	13.463	1.247
1.802	13.339	13.528	1.345
1.809	14.203	13.341	1.257
1.816	13.98	13.105	1.234
1.823	15.428	13.067	1.252
1.83	14.214	12.55	1.228
1.838	14.09	11.966	1.198
1.845	15.053	12.141	1.231
1.852	14.897	11.997	1.192
1.859	15.089	12.692	1.203
1.866	15.57	12.488	1.191
1.873	16.011	13.082	1.243
1.88	16.11	12.101	1.207
1.888	15.878	11.604	1.168
1.895	15.199	11.48	1.128
1.902	15.482	12.725	1.153
1.909	14.821	10.622	1.119
1.916	16.052	11.334	1.161
1.923	15.17	12.254	1.199
1.93	14.562	10.954	1.202
1.938	14.572	11.464	1.227
1.945	14.685	11.209	1.2
1.952	14.467	11.316	1.173
1.959	14.834	12.032	1.198
1.966	14.708	11.499	1.19
1.973	15.545	11.885	1.187
1.981	16.077	11.831	1.221
1.988	19.782	12.017	1.216
1.995	18.878	12.264	1.277
2.002	20.406	11.927	1.25
2.009	21.857	12.062	1.289
2.016	22.528	11.686	1.256
2.023	24.81	11.58	1.271
2.031	26.959	11.871	1.321
2.038	26.9	11.099	1.303
2.045	31.216	11.496	1.379
2.052	33.984	11.204	1.457
2.059	36.857	11.25	1.527
2.066	37.841	11.134	1.509
2.073	40.839	10.529	1.586
2.081	41.456	10.378	1.605
2.088	41.64	10.318	1.622
2.095	42.265	10.55	1.673
2.102	41.219	10.076	1.647
2.109	40.231	9.918	1.623
2.116	40.365	10.151	1.614
2.123	37.691	9.661	1.517
2.131	36.591	10.258	1.522
2.138	34.196	10.251	1.428
2.145	33.47	10.236	1.443
2.152	30.62	10.546	1.386
2.159	28.751	10.022	1.324
2.166	26.449	10.288	1.292
2.174	23.938	10.369	1.262
2.181	23.516	10.556	1.216
2.188	22.133	10.536	1.168
2.195	23.05	10.319	1.159
2.202	22.646	10.471	1.175
2.209	22.969	10.52	1.234
2.216	23.869	10.504	1.187
2.224	25.015	10.734	1.201
2.231	24.753	11.09	1.213
2.238	24.904	10.63	1.191
2.245	26.421	10.786	1.22
2.252	26.739	10.945	1.252
2.259	27.608	11.075	1.313
2.266	28.609	10.837	1.311
2.274	28.694	10.682	1.353
2.281	29.563	10.576	1.329
2.288	31.686	10.637	1.406
2.295	32.231	10.821	1.468
2.302	33.733	10.467	1.491
2.309	33.957	10.309	1.526
2.317	34.578	10.086	1.548
2.324	38.108	10.539	1.662
2.331	39.941	10.722	1.834
2.338	41.414	10.592	1.829
2.345	42.974	10.766	1.876
2.352	44.022	10.873	1.861
2.359	45.1	10.796	1.921
2.367	44.794	11.219	1.947
2.374	47.475	10.776	1.83
2.381	43.738	10.872	1.782
2.388	42.875	11.051	1.857
2.395	41.733	10.697	1.802
2.402	37.907	10.53	1.722
2.409	37.683	11.384	1.713
2.417	36.32	10.795	1.614
2.424	33.217	11.538	1.521
2.431	34.136	10.866	1.507
2.438	31.382	10.933	1.37
2.445	30.893	13.611	1.39
2.452	30.66	11.525	1.344
2.46	25.74	11.479	1.331
2.467	25.227	12.353	1.255
2.474	25.781	12.541	1.207
2.481	24.689	12.579	1.256
2.488	25.545	11.956	1.275
2.495	23.711	12.183	1.318
2.502	22.339	11.22	1.22
2.51	20.014	11.981	1.159
2.517	21.051	11.944	1.221
2.524	20.996	12.87	1.191
2.531	22.266	13.284	1.295
2.538	21.678	13.425	1.227
2.545	22.912	14.221	1.263
2.552	20.097	11.835	1.12
2.56	24.331	14.643	1.323
2.567	20.488	12.568	1.171
2.574	23.435	14.061	1.363
2.581	21.637	13.082	1.244
2.588	22.132	14.076	1.244
2.595	23.656	13.521	1.348
2.603	24.359	15.147	1.381
2.61	22.49	12.448	1.233
2.617	22.672	13.045	1.408
2.624	24.502	13.414	1.418
2.631	25.155	13.135	1.464
2.638	25.497	13.437	1.457
2.645	25.135	13.839	1.397
2.653	25.296	13.496	1.518
2.66	28.404	13.64	1.464
2.667	25.777	13.703	1.582
2.674	26.129	13.627	1.59
2.681	29.192	13.563	1.599
2.688	26.838	13.631	1.456
2.695	26.071	14.176	1.54
2.703	25.564	12.884	1.48
2.71	29.404	14.058	1.555
2.717	27.541	13.449	1.573
2.724	26.022	13.559	1.496
2.731	27.126	15.234	1.47
2.738	26.522	14.787	1.581
2.746	25.089	13.936	1.353
2.753	23.475	17.623	1.344
2.76	25.096	15	1.471
2.767	23.657	15.65	1.461
2.774	24.248	16.551	1.379
2.781	26.1	15.526	1.478
2.788	22.243	16.335	1.427
2.796	20.961	15.73	1.461
2.803	20.994	15.733	1.375
2.81	21.286	16.352	1.496
2.817	19.037	15.581	1.313
2.824	19.466	16.113	1.34
2.831	22.162	16.452	1.346
2.838	18.514	15.193	1.375
2.846	20.144	16.336	1.353
2.853	17.596	15.586	1.314
2.86	18.678	16.2	1.358
2.867	19.536	16.973	1.532
2.874	17.29	15.902	1.261
2.881	19.278	16.661	1.35
2.889	19.433	16.82	1.356
2.896	16.64	15.686	1.312
2.903	17.062	15.721	1.277
2.91	17.761	14.937	1.398
2.917	17.518	14.993	1.371
2.924	17.227	14.774	1.389
2.931	17.448	15.606	1.388
2.939	18.856	15.278	1.278
2.946	17.019	14.744	1.325
2.953	16.954	16.103	1.359
2.96	16.353	14.032	1.245
2.967	18.049	14.487	1.349
2.974	17.293	15.534	1.346
2.981	18.077	14.393	1.352
2.989	18.881	14.089	1.331
2.996	19.533	14	1.354
3.003	19.959	14.127	1.299
3.01	18.516	12.778	1.184
3.017	21.312	14.507	1.304
3.024	20.576	14.206	1.33
3.032	19.872	12.981	1.222
3.039	19.754	13.946	1.379
3.046	20.325	13.166	1.326
3.053	19.892	14.42	1.213
3.06	21.657	12.735	1.261
3.067	19.215	12.928	1.164
3.074	19.85	13.829	1.239
3.082	21.009	13.82	1.323
3.089	19.688	13.229	1.271
3.096	19.388	13.64	1.22
3.103	20.085	12.647	1.151
3.11	18.331	12.804	1.142
3.117	17.719	13.367	1.098
3.124	21.541	13.181	1.193
3.132	19.834	13.505	1.248
3.139	19.987	13.962	1.168
3.146	17.012	11.945	1.084
3.153	18.714	12.864	1.065
3.16	17.006	13.595	1.127
3.167	18.203	13.766	1.183
3.175	16.38	11.577	1.036
3.182	17.888	13.254	1.074
3.189	17.667	12.699	1.082
3.196	17.694	13.729	1.147
3.203	18.248	12.836	1.059
3.21	16.911	12.506	1.162
3.217	16.813	12.765	1.09
3.225	16.361	11.867	1.081
3.232	16.57	12.668	1.156
3.239	18.637	13.449	1.121
3.246	17.236	12.628	1.245
3.253	17.189	13.426	1.113
3.26	17.88	14.916	1.203
3.267	16.583	13.259	1.265
3.275	18.52	13.895	1.213
3.282	18.643	13.479	1.271
3.289	17.024	14.072	1.24
3.296	17.885	13.672	1.292
3.303	16.494	13.7	1.224
3.31	16.741	15.041	1.334
3.318	15.886	14.592	1.207
3.325	16.437	13.731	1.254
3.332	15.956	13.331	1.221
3.339	15.874	14.74	1.343
3.346	15.355	14.222	1.218
3.353	15.985	14.101	1.258
3.36	15.443	14.368	1.188
3.368	15.067	14.518	1.179
3.375	14.831	13.777	1.216
3.382	14.31	13.63	1.261
3.389	15.069	14.251	1.226
3.396	14.55	14.142	1.276
3.403	15.329	14.216	1.221
3.41	13.994	13.959	1.291
3.418	14.106	15.625	1.22
3.425	13.564	14.444	1.129
3.432	15.146	14.828	1.301
3.439	14.635	14.757	1.219
3.446	14.18	14.184	1.226
3.453	14.922	14.691	1.278
3.461	14.726	14.685	1.25
3.468	13.418	15.24	1.202
3.475	14.399	15.426	1.261
3.482	13.6	14.076	1.205
3.489	14.989	14.86	1.268
3.496	13.649	14.726	1.213
3.503	13.923	15.435	1.237
3.511	12.582	13.211	1.109
3.518	14.477	15.821	1.314
3.525	14.011	14.739	1.226
3.532	14.049	16.015	1.282
3.539	14.33	14.547	1.22
3.546	14.257	16.611	1.303
3.553	13.947	15.862	1.219
3.561	12.94	14.546	1.272
3.568	13.152	15.778	1.291
3.575	12.928	15.633	1.203
3.582	13.116	14.057	1.207
3.589	14.493	15.576	1.229
3.596	13.385	14.431	1.22
3.604	13.087	15.312	1.279
3.611	13.194	14.85	1.398
3.618	13.86	15.504	1.301
3.625	15.575	14.758	1.322
3.632	13.899	14.501	1.181
3.639	14.405	15.287	1.293
3.646	14.609	15.314	1.272
3.654	14.755	16.397	1.268
3.661	14.804	14.564	1.264
3.668	15.09	14.931	1.287
3.675	15.342	14.303	1.297
3.682	15.248	15.13	1.304
3.689	14.218	15.039	1.2
3.696	14.655	14.97	1.195
3.704	14.398	13.97	1.212
3.711	14.995	13.841	1.185
3.718	15.683	15.346	1.236
3.725	14.857	14.536	1.213
3.732	15.852	15.175	1.28
3.739	16.182	14.997	1.238
3.747	14.912	13.554	1.169
3.754	15.655	14.88	1.204
3.761	15.056	14.013	1.227
3.768	16.043	14.261	1.227
3.775	17.682	14.545	1.157
3.782	15.245	14.361	1.175
3.789	15.553	13.204	1.206
3.797	15.727	14.448	1.201
3.804	14.734	12.91	1.129
3.811	14.977	13.574	1.127
3.818	16.324	13.952	1.205
3.825	18.148	14.014	1.166
3.832	16.119	13.528	1.24
3.839	16.518	14.681	1.164
3.847	16.907	14.413	1.222
3.854	17.114	13.24	1.157
3.861	17.63	13.798	1.141
3.868	16.232	12.812	1.172
3.875	17.641	13.386	1.195
3.882	16.751	12.578	1.138
3.89	18.61	12.798	1.215
3.897	16.869	12.473	1.054
3.904	17.779	12.405	1.193
3.911	18.23	12.149	1.228
3.918	16.486	11.709	1.094
3.925	16.905	13.07	1.162
3.932	17.973	12.055	1.106
3.94	16.692	12.83	1.15
3.947	15.856	12.363	1.112
3.954	16.435	12.234	1.106
3.961	16.981	11.436	1.108
3.968	16.13	10.357	1.03
3.975	18.36	12.302	1.183
3.982	18.229	12.271	1.126
3.99	16.669	10.606	1.041
3.997	17.633	11.616	1.088
4.004	17.683	10.823	1.085
4.011	17.507	10.942	1.042
4.018	18.078	10.94	1.15
4.025	19.16	11.982	1.199
4.033	19.513	10.946	1.125
4.04	18.613	12.478	1.26
4.047	18.745	11.17	1.149
4.054	18.433	11.187	1.14
4.061	17.259	11.105	1.077
4.068	20.962	11.329	1.078
4.075	19.84	11.515	1.217
4.083	18.805	11.125	1.075
4.09	20.54	11.826	1.149
4.097	18.269	11.769	1.052
4.104	19.832	11.593	1.096
4.111	20.921	11.035	1.166
4.118	20.603	11.722	1.207
4.125	20.512	10.772	1.118
4.133	20.727	11.336	1.227
4.14	19.403	11.488	1.117
4.147	20.853	10.943	1.179
4.154	21.588	11.742	1.188
4.161	21.498	12.585	1.179
4.168	20.977	11.183	1.094
4.176	22.201	11.923	1.174
4.183	21.739	11.718	1.159
4.19	20.996	12.045	1.17
4.197	20.838	11.468	1.121
4.204	20.963	11.87	1.27
4.211	20.801	12.046	1.204
4.218	21.201	12.042	1.057
4.226	21.789	11.48	1.209
4.233	22.227	11.287	1.137
4.24	22.33	12.444	1.115
4.247	20.32	12.231	1.15
4.254	20.646	11.405	1.067
4.261	22.129	11.672	1.179
4.268	20.05	11.11	1.091
4.276	23.773	12.564	1.17
4.283	20.367	10.773	1.093
4.29	20.267	11.091	1.184
4.297	21.118	11.136	1.256
4.304	23.143	11.23	1.122
4.311	19.417	10.457	1.141
4.318	20.207	9.981	1.041
4.326	22.902	12.748	1.122
4.333	21.566	10.898	1.146
4.34	19.144	9.968	1.057
4.347	23.002	11.284	1.225
4.354	21.673	10.916	1.13
4.361	21.299	11.504	1.191
4.369	20.571	11.638	1.211
4.376	22.212	12.052	1.161
4.383	21.994	12.087	1.205
4.39	21.221	11.325	1.23
4.397	19.393	10.164	1.053
4.404	21.23	11.729	1.171
4.411	21.596	12.103	1.197
4.419	20.951	11.75	1.176
4.426	21.203	12.42	1.247
4.433	21.21	11.981	1.199
4.44	21.636	12.264	1.259
4.447	20.955	11.686	1.226
4.454	21.747	12.188	1.277
4.461	19.828	11.093	1.158
4.469	23.046	11.729	1.162
4.476	21.68	13.479	1.204
4.483	21.214	12.165	1.268
4.49	20.265	11.925	1.203
4.497	20.382	12.014	1.186
4.504	19.325	11.601	1.228
4.512	20.015	11.286	1.205
4.519	20.673	12.506	1.337
4.526	24.048	12.17	1.176
4.533	21.456	11.924	1.177
4.54	19.548	11.98	1.201
4.547	20.018	11.604	1.258
4.554	21.055	12.36	1.166
4.562	18.854	11.389	1.208
4.569	22.751	12.508	1.246
4.576	20.544	11.772	1.18
4.583	22.655	12.591	1.224
4.59	18.001	11.672	1.256
4.597	18.794	11.983	1.178
4.604	20.978	12.305	1.236
4.612	20.316	12.456	1.274
4.619	21.403	11.417	1.434
4.626	19.45	11.855	1.19
4.633	20.736	11.44	1.178
4.64	19.146	11.297	1.23
4.647	18.274	10.059	1.145
4.655	19.509	10.828	1.201
4.662	22.763	12.748	1.257
4.669	19.547	10.323	1.103
4.676	20.719	11.688	1.271
4.683	21.069	10.958	1.218
4.69	19.364	10.393	1.156
4.697	21.185	11.248	1.198
4.705	18.866	10.126	1.062
4.712	19.721	9.651	1.108
4.719	20.191	10.537	1.175
4.726	21.024	10.073	1.258
4.733	21.564	10.817	1.204
4.74	21.434	9.796	1.207
4.747	20.623	9.43	1.151
4.755	21.607	10.166	1.207
4.762	21.729	9.876	1.208
4.769	21.858	10.437	1.187
4.776	21.323	9.963	1.206
4.783	20.562	12.132	1.205
4.79	22.483	9.638	1.246
4.798	23.325	9.828	1.255
4.805	21.764	9.868	1.237
4.812	22.337	9.683	1.277
4.819	19.977	9.514	1.18
4.826	21.689	9.421	1.194
4.833	22.122	9.029	1.169
4.84	23.237	9.537	1.201
4.848	23.444	10.09	1.207
4.855	24.785	10.35	1.209
4.862	23.586	10.858	1.238
4.869	24.884	9.513	1.265
4.876	23.961	9.691	1.246
4.883	25.177	10.032	1.278
4.89	24.793	10.077	1.32
4.898	25.132	9.992	1.251
4.905	25.262	9.877	1.289
4.912	26.44	10.336	1.293
4.919	26.713	9.938	1.286
4.926	24.623	10.046	1.327
4.933	22.48	9.16	1.143
4.941	24.599	10.677	1.351
4.948	24.702	11.396	1.283
4.955	24.282	10.525	1.221
4.962	23.465	10.312	1.221
4.969	25.872	9.758	1.213
4.976	24.946	10.587	1.295
4.983	24.53	10.228	1.277
4.991	23.762	10.925	1.295
4.998	24.073	10.153	1.257
5.005	25.022	10.396	1.22
5.012	21.861	9.951	1.163
5.019	22.836	11.073	1.187
5.026	24.043	10.007	1.186
5.033	21.681	9.978	1.185
5.041	21.796	10.174	1.181
5.048	22.098	10.571	1.216
5.055	20.805	10.212	1.164
5.062	21.976	10.475	1.158
5.069	18.007	9.484	1.127
5.076	16.848	9.374	1.073
5.084	20.135	11.099	1.208
5.091	20.727	11.354	1.133
5.098	18.839	11.291	1.256
5.105	21.129	10.582	1.156
5.112	20.235	10.278	1.137
5.119	19.535	11.378	1.14
5.126	17.786	12.023	1.184
5.134	17.631	11.432	1.225
5.141	16.719	11.075	1.151
5.148	17.668	11.048	1.208
5.155	16.532	11.489	1.129
5.162	16.057	10.258	1.068
5.169	18.124	11.678	1.175
5.176	17.08	11.024	1.17
5.184	18.417	11.035	1.146
5.191	16.216	11.035	1.098
5.198	17.25	11.406	1.2
5.205	17.029	11.641	1.14
5.212	16.414	11.653	1.214
5.219	15.871	11.084	1.121
5.227	17.27	11.706	1.167
5.234	16.754	11.665	1.149
5.241	17.398	11.431	1.067
5.248	17.093	11.527	1.171
5.255	16.951	12.417	1.148
5.262	16.508	11.421	1.183
5.269	16.904	12.586	1.248
5.277	17.275	11.973	1.137
5.284	18.364	12.589	1.182
5.291	14.96	11.103	1.082
5.298	17.216	12.24	1.17
5.305	17.602	11.811	1.143
5.312	15.632	11.7	1.11
5.319	16.854	11.409	1.175
5.327	17.762	11.734	1.201
5.334	14.847	10.781	1.131
5.341	15.621	11.811	1.134
5.348	15.968	12.058	1.165
5.355	15.95	12.336	1.122
5.362	15.404	11.838	1.18
5.37	15.912	11.635	1.161
5.377	15.561	11.566	1.128
5.384	15.012	11.646	1.164
5.391	17.622	11.996	1.383
5.398	15.164	11.37	1.14
5.405	12.309	9.469	0.921
5.412	15.701	11.805	1.158
5.42	14.619	12.738	1.196
5.427	15.074	11.424	1.213
5.434	15.629	13.264	1.196
5.441	15.288	11.439	1.162
5.448	15.493	11.517	1.168
5.455	15.597	11.839	1.166
5.462	15.571	12.191	1.163
5.47	14.876	11.495	1.134
5.477	13.462	10.761	1.113
5.484	14.39	11.77	1.141
5.491	14.157	11.905	1.208
5.498	13.992	11.749	1.15
5.505	14.15	11.323	1.173
5.513	14.233	11.642	1.292
5.52	15.117	11.924	1.176
5.527	14.293	11.454	1.133
5.534	15.095	11.958	1.223
5.541	14.808	11.882	1.189
5.548	14.144	11.757	1.233
5.555	13.974	12.434	1.162
5.563	15.214	11.997	1.179
5.57	14.342	11.644	1.122
5.577	13.913	12.036	1.152
5.584	14.772	12.138	1.206
5.591	14.408	11.85	1.154
5.598	14.844	12.279	1.193
5.605	14.311	12.178	1.221
5.613	14.856	12.531	1.181
5.62	14.988	12.002	1.172
5.627	14.711	11.841	1.171
5.634	15.544	12.49	1.216
5.641	14.12	11.959	1.154
5.648	14.872	12.366	1.23
5.656	14.049	12.139	1.163
5.663	14.878	12.713	1.191
5.67	15.648	12.793	1.24
5.677	14.887	12.921	1.227
5.684	13.928	12.22	1.162
5.691	14.387	12.499	1.166
5.698	14.853	12.3	1.188
5.706	14.186	12.369	1.129
5.713	13.892	11.952	1.112
5.72	14.359	12.385	1.115
5.727	15.916	12.448	1.215
5.734	14.33	12.464	1.174
5.741	14.01	12.824	1.208
5.748	14.048	12.433	1.167
5.756	13.381	12.114	1.142
5.763	14.306	12.678	1.205
5.77	13.827	12.501	1.192
5.777	13.573	13.27	1.188
5.784	13.682	14.124	1.195
5.791	13.531	12.716	1.181
5.798	13.187	13.293	1.197
5.806	13.604	12.806	1.209
5.813	13.097	12.397	1.212
5.82	13.586	12.707	1.204
5.827	13.541	13.14	1.244
5.834	15.675	12.769	1.159
5.841	13.06	12.542	1.183
5.849	12.952	12.758	1.197
5.856	12.726	12.808	1.202
5.863	13.4	12.762	1.218
5.87	12.199	12.616	1.21
5.877	12.848	12.911	1.214
5.884	12.648	12.399	1.168
5.891	13.135	13.022	1.201
5.899	12.922	13.167	1.237
5.906	13.427	14.005	1.189
5.913	14.285	13.179	1.186
5.92	12.913	12.604	1.194
5.927	13.874	16.037	1.229
5.934	12.728	13.504	1.186
5.942	13.238	12.756	1.201
5.949	13.466	13.313	1.286
5.956	13.918	14.5	1.198
5.963	12.988	12.606	1.172
5.97	13.45	13.004	1.189
5.977	13.391	13.369	1.208
5.984	13.552	13.685	1.186
5.992	13.683	13.448	1.214
5.999	14.025	12.975	1.202
6.006	13.209	13.06	1.179
6.013	14.165	13.721	1.22
6.02	14.084	13.815	1.254
6.027	13.333	13.163	1.21
6.034	13.71	12.879	1.209
6.042	13.445	13.643	1.227
6.049	14.18	13.299	1.249
6.056	13.984	13.416	1.311
6.063	13.702	13.623	1.237
6.07	13.867	13.323	1.212
6.077	13.365	13.427	1.177
6.085	13.501	13.64	1.206
6.092	13.708	14.386	1.247
6.099	13.453	13.367	1.215
6.106	13.586	13.545	1.218
6.113	13.302	13.814	1.224
6.12	12.785	13.407	1.234
6.127	13.047	13.717	1.244
6.135	13.415	13.681	1.26
6.142	12.78	13.318	1.226
6.149	12.982	13.26	1.213
6.156	13.32	13.999	1.26
6.163	12.501	12.978	1.224
6.17	12.661	13.43	1.248
6.177	12.904	13.487	1.265
6.185	12.571	13.241	1.228
6.192	13.336	13.922	1.313
6.199	13.044	13.645	1.258
6.206	12.924	14.021	1.233
6.213	12.656	13.408	1.263
6.22	12.844	13.932	1.228
6.227	13.127	14.241	1.255
6.235	13.124	13.954	1.262
6.242	12.87	13.122	1.24
6.249	12.365	13.252	1.226
6.256	12.786	13.508	1.211
6.263	13.971	13.967	1.248
6.27	12.017	12.485	1.135
6.278	12.173	12.964	1.147
6.285	12.666	13.683	1.201
6.292	13.373	14.13	1.248
6.299	13.011	14.208	1.204
6.306	13.215	13.921	1.231
6.313	13.19	14.447	1.281
6.32	12.916	13.895	1.216
6.328	12.628	14.061	1.249
6.335	12.281	13.36	1.203
6.342	13.142	14.388	1.274
6.349	12.84	14.505	1.262
6.356	13.887	14.792	1.316
6.363	13.135	14.472	1.302
6.37	13.873	14.873	1.269
6.378	12.657	13.924	1.204
6.385	13.196	13.662	1.223
6.392	13.83	13.924	1.256
6.399	11.907	13.551	1.144
6.406	12.909	13.742	1.201
6.413	13.77	14.344	1.293
6.421	13.514	15.186	1.318
6.428	13.346	14.818	1.244
6.435	13.588	14.16	1.316
6.442	13.759	15.088	1.272
6.449	13.948	14.215	1.287
6.456	13.213	14.47	1.35
6.463	13.377	14.54	1.274
6.471	14.249	15.048	1.311
6.478	12.993	14.926	1.272
6.485	13.732	14.254	1.289
6.492	13.329	14.493	1.336
6.499	13.353	14.64	1.331
6.506	13.836	14.757	1.3
6.513	14.279	15.613	1.297
6.521	12.518	14.221	1.277
6.528	14.085	14.716	1.333
6.535	13.268	15.369	1.343
6.542	12.021	13.981	1.231
6.549	12.83	13.626	1.231
6.556	12.946	14.319	1.308
6.564	13.06	15.167	1.328
6.571	12.947	14.933	1.387
6.578	12.621	14.736	1.363
6.585	12.404	14.092	1.33
6.592	12.88	14.857	1.332
6.599	12.358	14.967	1.295
6.606	13.041	14.441	1.329
6.614	13.017	13.699	1.338
6.621	11.835	14.415	1.283
6.628	12.163	14.247	1.344
6.635	14.097	14.353	1.419
6.642	12.486	14.301	1.29
6.649	12.846	13.827	1.321
6.656	13.597	14.566	1.348
6.664	11.933	13.964	1.392
6.671	12.442	14.373	1.425
6.678	11.544	13.667	1.243
6.685	13.005	14.404	1.364
6.692	12.263	13.937	1.321
6.699	12.685	14.571	1.393
6.707	13.425	15.253	1.396
6.714	12.129	13.939	1.35
6.721	13.294	14.249	1.38
6.728	13.099	13.818	1.313
6.735	13.966	14.664	1.359
6.742	12.313	14.475	1.378
6.749	12.492	14.202	1.309
6.757	12.771	14.568	1.366
6.764	12.525	14.539	1.341
6.771	12.541	13.573	1.375
6.778	14.088	14.64	1.432
6.785	12.452	15.455	1.388
6.792	12.849	14.373	1.402
6.799	13.465	15.297	1.452
6.807	13.236	14.768	1.362
6.814	14.145	14.685	1.469
6.821	13.471	14.438	1.343
6.828	13.868	16.418	1.551
6.835	14.066	16.045	1.436
6.842	14.546	17.589	1.389
6.85	14.696	15.216	1.517
6.857	14.634	15.682	1.441
6.864	14.357	17.388	1.489
6.871	14.861	16.01	1.43
6.878	13.704	15.59	1.333
6.885	14.865	16.118	1.445
6.892	15.947	17.376	1.466
6.9	12.63	13.718	1.247
6.907	15.492	17.926	1.489
6.914	16.514	16.289	1.442
6.921	15.865	17.957	1.578
6.928	16.28	16.566	1.492
6.935	15.869	16.917	1.44
6.942	16.606	17.644	1.499
6.95	18.78	17.536	1.557
6.957	18.056	19.51	1.601
6.964	19.181	19.022	1.666
6.971	18.992	18.574	1.611
6.978	19.549	19.05	1.629
6.985	19.876	18.747	1.643
6.993	19.082	19.452	1.658
7	18.772	18.706	1.654
7.007	20.846	18.543	1.615
7.014	19.18	18.061	1.532
7.021	20.048	17.304	1.543
7.028	19.869	18.261	1.721
7.035	21.237	20.028	1.664
7.043	21.633	18.46	1.655
7.05	20.324	18.223	1.623
7.057	18.983	17.882	1.391
7.064	20.234	17.83	1.705
7.071	20.024	17.688	1.484
7.078	18.77	17.866	1.541
7.085	21.441	19.46	1.549
7.093	18.99	17.535	1.391
7.1	18.621	18.26	1.338
7.107	17.594	17.096	1.359
7.114	19.171	19.626	1.461
7.121	17.569	18.913	1.457
7.128	19.325	17.149	1.522
7.136	16.092	16.101	1.368
7.143	17.51	15.591	1.276
7.15	16.986	17.501	1.43
7.157	15.694	15.539	1.312
7.164	17.193	17.093	1.427
7.171	16.811	18.086	1.476
7.178	15.339	16.484	1.405
7.186	15.301	15.686	1.485
7.193	14.297	15.268	1.233
7.2	14.794	15.637	1.341
7.207	13.715	16.045	1.288
7.214	14.816	16.235	1.346
7.221	12.205	14.647	1.182
7.228	15.175	15.635	1.327
7.236	13.782	17.179	1.339
7.243	13.305	16.524	1.22
7.25	13.681	16.243	1.409
7.257	14.842	15.608	1.269
7.264	14.173	16.225	1.368
7.271	16.157	15.499	1.353
7.279	14.554	15.913	1.324
7.286	16.307	15.452	1.327
7.293	12.899	14.363	1.259
7.3	14.907	16.177	1.353
7.307	14.358	16.097	1.505
7.314	14.478	16.539	1.387
7.321	14.883	15.309	1.514
7.329	15.448	15.072	1.311
7.336	15.622	15.465	1.41
7.343	13.837	16.161	1.342
7.35	13.617	15.633	1.343
7.357	13.931	15.367	1.387
7.364	15.119	15.604	1.369
7.371	14.216	14.912	1.392
7.379	13.236	13.872	1.363
7.386	13.617	14.596	1.427
7.393	14.455	14.322	1.267
7.4	15.25	14.639	1.377
7.407	14.439	14.663	1.442
7.414	14.064	14.17	1.448
7.422	14.777	15.168	1.452
7.429	14.035	15.303	1.44
7.436	14.321	15.585	1.597
7.443	13.824	14.692	1.436
7.45	13.527	14.193	1.336
7.457	13.456	14.157	1.378
7.464	15.238	15.446	1.444
7.472	14.806	15.776	1.567
7.479	14.215	14.896	1.387
7.486	14	15.8	1.541
7.493	15.802	17.563	1.583
7.5	13.518	16.465	1.515
7.507	14.366	16.279	1.465
7.514	13.309	14.066	1.535
7.522	13.378	15.157	1.434
7.529	13.018	14.726	1.466
7.536	14.66	16.193	1.5
7.543	13.685	16.021	1.438
7.55	13.473	15.17	1.352
7.557	15.154	15.684	1.437
7.565	14.281	15.256	1.495
7.572	12.319	13.779	1.321
7.579	14.219	14.935	1.426
7.586	15.1	15.055	1.369
7.593	13.748	15.583	1.35
7.6	15.188	15.634	1.397
7.607	14.57	15.716	1.465
7.615	14.29	16.191	1.378
7.622	14.24	16.661	1.29
7.629	15.221	16.487	1.494
7.636	14.251	15.652	1.407
7.643	16.97	16.645	1.375
7.65	14.459	15.64	1.386
7.657	14.021	14.619	1.325
7.665	14.155	15.906	1.311
7.672	14.349	15.452	1.321
7.679	15.122	16.359	1.363
7.686	13.648	15.046	1.274
7.693	16.263	15.905	1.344
7.7	15.248	15.045	1.291
7.708	15.478	16.069	1.18
7.715	14.581	15.369	1.369
7.722	14.498	14.488	1.321
7.729	15.414	15.635	1.261
7.736	15.604	15.203	1.282
7.743	14.982	14.95	1.312
7.75	14.616	16.083	1.29
7.758	14.967	14.625	1.176
7.765	14.635	16.477	1.278
7.772	14.859	15.771	1.274
7.779	14.467	15.325	1.279
7.786	13.769	14.478	1.307
7.793	13.403	14.372	1.167
7.8	15.178	16.186	1.28
7.808	15.119	17.284	1.342
7.815	14.595	15.368	1.338
7.822	14.593	15.05	1.307
7.829	14.349	15.156	1.221
7.836	14.117	15.643	1.276
7.843	14.112	14.33	1.131
7.851	14.219	16.142	1.21
7.858	12.813	14.472	1.271
7.865	13.901	16.647	1.47
7.872	12.356	14.534	1.226
7.879	13.546	14.679	1.181
7.886	13.539	15.599	1.257
7.893	14.304	15.365	1.254
7.901	15.565	16.323	1.317
7.908	15.561	14.86	1.204
7.915	13.758	14.599	1.23
7.922	12.833	14.53	1.189
7.929	14.063	14.964	1.164
7.936	13.81	15.313	1.204
7.943	12.859	13.696	1.167
7.951	14.052	18.308	1.345
7.958	14.106	16.566	1.301
7.965	13.301	14.666	1.22
7.972	14.232	14.701	1.362
7.979	13.595	14.406	1.358
7.986	13.845	16.102	1.226
7.993	14.151	15.777	1.243
8.001	14.221	15.434	1.336
8.008	14.665	15.028	1.354
8.015	15.368	14.841	1.277
8.022	15.48	15.276	1.323
8.029	13.984	14.946	1.289
8.036	14.165	14.536	1.249
8.044	14.207	14.18	1.173
8.051	15.312	15.813	1.251
8.058	13.892	14.299	1.216
8.065	14.047	14.367	1.232
8.072	14.303	15.008	1.28
8.079	12.852	14.071	1.143
8.086	12.963	14.21	1.231
8.094	13.384	14.331	1.205
8.101	13.043	14.081	1.203
8.108	13.908	14.338	1.273
8.115	12.706	13.997	1.154
8.122	13.004	13.94	1.193
8.129	13.052	14.344	1.249
8.137	13.68	15.123	1.311
8.144	13.462	14.542	1.2
8.151	13.743	14.518	1.251
8.158	13.752	14.474	1.313
8.165	12.691	14.026	1.217
8.172	13.169	13.883	1.363
8.179	12.797	13.635	1.181
8.187	12.411	13.346	1.161
8.194	12.494	13.607	1.185
8.201	12.94	14.064	1.192
8.208	13.369	13.465	1.183
8.215	13.774	13.966	1.214
8.222	12.529	13.274	1.154
8.229	12.179	13.558	1.219
8.237	12.539	13.529	1.2
8.244	12.719	14.357	1.304
8.251	13.224	14.094	1.142
8.258	11.884	13.068	1.216
8.265	13.899	14.175	1.204
8.272	12.821	13.911	1.205
8.279	12.335	13.387	1.21
8.287	12.973	13.812	1.282
8.294	11.951	13.02	1.149
8.301	12.413	13.329	1.176
8.308	13.181	15.16	1.209
8.315	12.364	13.927	1.138
8.322	12.53	14.521	1.277
8.33	13.731	14.275	1.273
8.337	13.515	14.742	1.329
8.344	12.886	13.559	1.203
8.351	12.226	13.176	1.183
8.358	12.757	14.125	1.253
8.365	12.749	13.895	1.219
8.372	12.893	14.485	1.164
8.38	12.816	14.75	1.212
8.387	13.507	14.574	1.205
8.394	12.777	13.475	1.185
8.401	12.332	14.503	1.211
8.408	13.425	14.359	1.224
8.415	12.615	13.94	1.217
8.422	12.203	13.136	1.125
8.43	13.247	13.988	1.33
8.437	13.058	12.944	1.136
8.444	14.301	14.489	1.227
8.451	13.699	14.89	1.226
8.458	12.498	13.573	1.16
8.465	13.379	15.215	1.246
8.473	13.362	13.95	1.21
8.48	12.547	14.312	1.269
8.487	13.385	14.801	1.313
8.494	12.328	17.611	1.209
8.501	13.631	13.479	1.179
8.508	13.141	13.502	1.217
8.515	13.443	13.314	1.187
8.523	13.69	13.871	1.152
8.53	13.854	13.976	1.205
8.537	12.826	14.416	1.312
8.544	13.279	13.504	1.222
8.551	13.282	14.351	1.177
8.558	13.427	13.749	1.147
8.565	14.348	14.968	1.204
8.573	13.645	13.418	1.171
8.58	13.608	13.269	1.192
8.587	15.026	13.388	1.172
8.594	12.655	13.1	1.182
8.601	13.967	13.49	1.227
8.608	13.302	13.175	1.176
8.616	13.263	13.138	1.263
8.623	14.3	14.083	1.177
8.63	13.021	13.747	1.193
8.637	13.46	13.661	1.222
8.644	14.367	14.49	1.284
8.651	14.291	14.523	1.321
8.658	13.672	13.398	1.294
8.666	14.225	12.638	1.219
8.673	15.72	12.893	1.252
8.68	14.36	13.121	1.23
8.687	14.972	13.342	1.305
8.694	14.698	14.07	1.262
8.701	15.335	14.392	1.296
8.708	13.443	12.416	1.166
8.716	15.441	14.693	1.225
8.723	13.323	12.645	1.138
8.73	14.42	12.744	1.179
8.737	13.74	13.147	1.163
8.744	16.54	12.998	1.288
8.751	13.964	13.097	1.155
8.759	15.183	13.348	1.201
8.766	14.502	13.585	1.228
8.773	15.353	12.601	1.184
8.78	15.43	13.103	1.29
8.787	15.175	12.893	1.227
8.794	15.361	13.815	1.268
8.801	15.671	13.151	1.232
8.809	12.888	11.502	0.991
8.816	14.872	12.832	1.1
8.823	15.251	13.538	1.167
8.83	16.668	13.051	1.427
8.837	15.257	12.195	1.219
8.844	15.932	13.879	1.21
8.851	16.583	13.462	1.31
8.859	16.813	13.982	1.215
8.866	16.378	12.654	1.177
8.873	16.686	12.557	1.18
8.88	16.335	12.817	1.22
8.887	15.771	12.51	1.083
8.894	16.532	12.568	1.128
8.902	15.409	11.361	1.061
8.909	16.61	12.741	1.238
8.916	16.824	12.087	1.144
8.923	16.774	12.341	1.194
8.93	16.898	13.656	1.198
8.937	17.789	13.046	1.248
8.944	18.073	14.297	1.237
8.952	17.064	12.878	1.152
8.959	17.301	12.823	1.327
8.966	16.334	11.698	1.044
8.973	19.122	14.02	1.323
8.98	17.529	13.463	1.303
8.987	18.512	12.78	1.289
8.994	16.831	15.625	1.175
9.002	18.282	14.432	1.328
9.009	17.528	12.652	1.108
9.016	16.739	12.658	1.275
9.023	19.298	12.371	1.187
9.03	16.284	12.923	1.172
9.037	18.403	13.636	1.362
9.045	18.103	13.426	1.223
9.052	16.553	12.648	1.106
9.059	16.784	11.848	1.162
9.066	18.493	13.276	1.196
9.073	17.49	13.133	1.18
9.08	18.269	13.082	1.192
9.087	18.579	13.322	1.412
9.095	18.336	13.407	1.296
9.102	16.655	14.37	1.243
9.109	18.154	13.197	1.196
9.116	17.735	13.544	1.357
9.123	18.61	14.036	1.247
9.13	17.843	12.232	1.168
9.137	20.214	13.919	1.24
9.145	18.449	13.379	1.222
9.152	17.376	12.881	1.167
9.159	19.291	14.811	1.245
9.166	19.86	13.234	1.317
9.173	18.806	12.348	1.21
9.18	19.628	14.08	1.246
9.188	20.058	14.454	1.35
9.195	20.144	13.271	1.385
9.202	19.258	13.432	1.351
9.209	18.478	12.431	1.255
9.216	19.209	12.431	1.279
9.223	20.967	12.406	1.217
9.23	19.964	14.99	1.362
9.238	20.727	15.292	1.415
9.245	18.876	13.396	1.196
9.252	19.28	14.475	1.271
9.259	20.971	13.652	1.385
9.266	20.272	13.471	1.344
9.273	19.825	14.759	1.311
9.28	18.399	11.869	1.127
9.288	19.548	14.832	1.401
9.295	18.805	15.174	1.293
9.302	23.018	13.574	1.392
9.309	21.118	14.383	1.313
9.316	19.236	13.863	1.253
9.323	21.019	13.72	1.364
9.331	24.779	14.492	1.445
9.338	21.186	14.519	1.27
9.345	19.461	14.116	1.233
9.352	18.777	13.305	1.236
9.359	18.978	14.794	1.254
9.366	20.286	14.34	1.447
9.373	19.208	13.732	1.333
9.381	20.653	15.097	1.459
9.388	19.367	14.187	1.271
9.395	16.816	11.698	1.244
9.402	18.969	13.406	1.387
9.409	22.119	13.776	1.31
9.416	17.925	14.455	1.251
9.423	16.977	13.856	1.272
9.431	19.442	13.799	1.375
9.438	20.971	13.741	1.33
9.445	18.559	13.54	1.273
9.452	16.652	12.475	1.197
9.459	17.563	13.055	1.23
9.466	19.689	13.921	1.27
9.474	19.773	15.014	1.394
9.481	20.127	13.764	1.374
9.488	17.692	12.502	1.215
9.495	18.141	12.88	1.291
9.502	20.755	13.393	1.379
9.509	19.231	13.281	1.389
9.516	22.033	13.02	1.309
9.524	19.196	14.47	1.422
9.531	18.367	11.967	1.31
9.538	21.04	13.099	1.3
9.545	19.234	13.544	1.429
9.552	19.766	12.937	1.324
9.559	20.247	13.679	1.43
9.566	20.551	13.404	1.343
9.574	20.637	13.111	1.337
9.581	20.874	12.813	1.394
9.588	19.491	11.958	1.314
9.595	20.93	13.041	1.32
9.602	20.237	12.252	1.261
9.609	21.071	13.984	1.218
9.617	21.128	12.542	1.302
9.624	21.756	13.234	1.251
9.631	18.675	11.449	1.131
9.638	19.082	10.13	1.013
9.645	19.062	11.351	1.249
9.652	22.245	12.315	1.279
9.659	23.161	11.701	1.266
9.667	21.333	11.366	1.308
9.674	25.692	11.781	1.212
9.681	24.31	14.656	1.316
9.688	23.346	11.586	1.295
9.695	23.057	10.921	1.222
9.702	22.411	10.731	1.121
9.709	23.152	10.848	1.18
9.717	22.328	10.588	1.175
9.724	25.639	10.695	1.298
9.731	25.374	10.01	1.169
9.738	23.417	8.789	1.082
9.745	28.402	10.94	1.273
9.752	26.534	9.83	1.326
9.76	28.629	10.733	1.257
9.767	28.028	9.694	1.216
9.774	28.031	10.947	1.186
9.781	28.7	10.387	1.279
9.788	27.62	11.324	1.337
9.795	25.161	9.362	1.252
9.802	26.154	10.849	1.244
9.81	25.156	8.766	1.123
9.817	26.11	10.23	1.169
9.824	27.64	11.058	1.247
9.831	27.489	10.379	1.245
9.838	26.394	10.506	1.136
9.845	26.339	10.328	1.263
9.852	23.869	11.265	1.234
9.86	24.084	11.617	1.253
9.867	23.295	9.546	1.243
9.874	20.881	10.526	1.188
9.881	23.313	10.747	1.217
9.888	22.97	10.454	1.261
9.895	21.776	10.11	1.226
9.903	22.073	10.492	1.167
9.91	23.038	9.831	1.114
9.917	23.191	8.4	1.034
9.924	21.725	9.83	1.132
9.931	21.979	11.562	1.249
9.938	22.218	10.001	1.178
9.945	21.279	9.796	1.177
9.953	20.57	9.694	1.195
9.96	20.688	9.336	1.156
9.967	22.989	10.351	1.209
9.974	24.275	9.597	1.177
9.981	23.881	9.324	1.094
9.988	20.671	9.866	1.104
9.995	22.502	11.23	1.12
10.003	23.055	9.815	1.066
10.01	23.065	10.687	1.23
10.017	21.064	9.361	1.102
10.024	19.893	8.672	1.088
10.031	20.801	9.802	1.051
10.038	20.853	9.578	1.14
10.046	23.064	10.946	1.159
10.053	21.264	10.011	1.076
10.06	23.128	11.316	1.101
10.067	22.252	10.78	1.176
10.074	21.82	10.256	1.095
10.081	20.681	11.018	1.11
10.088	23.068	10.296	1.241
10.096	21.724	10.706	1.153
10.103	24.951	10.891	1.322
10.11	24.732	11.426	1.291
10.117	21.784	10.167	1.096
10.124	21.827	10.031	1.181
10.131	20.903	9.419	1.129
10.138	20.734	9.583	1.068
10.146	22.575	11.516	1.214
10.153	22.553	10.227	1.216
10.16	23.355	10.754	1.232
10.167	21.657	10.735	1.262
10.174	21.594	11.184	1.184
10.181	22.357	10.828	1.098
10.188	21.34	12.259	1.236
10.196	21.443	11.454	1.321
10.203	21.855	10.871	1.147
10.21	19.576	12.432	1.135
10.217	23.703	12.025	1.294
10.224	20.465	11.791	1.193
10.231	19.879	12.575	1.23
10.239	20.055	12.05	1.103
10.246	19.717	12.637	1.15
10.253	21.377	13.171	1.242
10.26	20.085	13.649	1.198
10.267	18.616	13.144	1.245
10.274	17.527	12.896	1.13
10.281	17.836	13.536	1.199
10.289	18.89	13.098	1.198
10.296	17.853	13.66	1.144
10.303	17.202	12.624	1.174
10.31	17.126	14.983	1.197
10.317	17.404	14.173	1.16
10.324	15.309	12.209	0.989
10.331	17.063	14.93	1.154
10.339	16.22	15.23	1.24
10.346	16.309	14.17	1.363
10.353	17.222	16.161	1.188
10.36	16.188	14.408	1.205
10.367	17.479	14.434	1.253
10.374	15.17	14.467	1.213
10.382	16.155	15.041	1.206
10.389	15.944	15.351	1.168
10.396	16.04	13.863	1.068
10.403	17.319	14.941	1.187
10.41	16.324	14.404	1.257
10.417	17.197	15.194	1.253
10.424	17.052	15.014	1.207
10.432	16.181	15.285	1.269
10.439	17.7	15.738	1.227
10.446	17.02	15.583	1.23
10.453	17.573	14.96	1.215
10.46	18.304	16.34	1.212
10.467	14.589	13.83	1.101
10.474	16.701	14.671	1.179
10.482	16.755	15.726	1.185
10.489	16.202	15.756	1.187
10.496	15.214	14.472	1.131
10.503	16.798	15.547	1.236
10.51	15.723	15.761	1.267
10.517	16.229	14.886	1.203
10.525	17.371	14.829	1.284
10.532	16.43	15.667	1.329
10.539	15.442	16.68	1.209
10.546	15.58	16.121	1.236
10.553	17.525	15.666	1.246
10.56	15.046	15.176	1.158
10.567	14.924	14.97	1.203
10.575	16.101	14.706	1.215
10.582	14.687	14.234	1.163
10.589	16.427	14.809	1.203
10.596	14.72	14.03	1.152
10.603	15.049	15.271	1.247
10.61	13.986	13.961	1.119
10.617	14.229	16.094	1.264
10.625	15.121	15.686	1.192
10.632	15.446	14.907	1.242
10.639	14.156	15.377	1.178
10.646	13.846	15.873	1.171
10.653	13.04	14.863	1.163
10.66	14.528	14.519	1.195
10.668	13.529	14.14	1.178
10.675	14.19	14.966	1.245
10.682	13.614	15.727	1.169
10.689	13.56	14.38	1.144
10.696	13.951	14.588	1.235
10.703	12.859	13.505	1.157
10.71	14.075	14.238	1.119
10.718	12.681	13.551	1.3
10.725	12.695	13.997	1.183
10.732	12.504	13.806	1.3
10.739	12.5	14.145	1.221
10.746	12.933	12.453	1.102
10.753	10.879	12.085	1.063
10.76	11.748	14.233	1.143
10.768	12.665	14.647	1.326
10.775	11.31	13.08	1.149
10.782	11.795	14.17	1.214
10.789	11.791	13.551	1.194
10.796	11.91	13.939	1.227
10.803	12.087	13.666	1.177
10.811	12.368	13.443	1.18
10.818	12.276	13.956	1.246
10.825	12.635	13.815	1.227
10.832	12.477	14.008	1.196
10.839	11.494	13.509	1.144
10.846	11.667	13.27	1.146
10.853	13.204	13.066	1.262
10.861	11.841	13.774	1.265
10.868	11.907	13.917	1.192
10.875	12.093	13.653	1.226
10.882	12.857	12.914	1.235
10.889	12.428	14.825	1.292
10.896	12.273	13.753	1.308
10.903	12.951	13.28	1.252
10.911	12.452	13.216	1.421
10.918	12.462	14.614	1.222
10.925	12.104	13.329	1.256
10.932	13.193	15.656	1.247
10.939	11.936	14.22	1.182
10.946	13.595	14.053	1.305
10.954	12.916	15.386	1.269
10.961	13.907	15.025	1.29
10.968	13.032	14.653	1.275
10.975	12.446	13.87	1.356
10.982	13.012	14.532	1.241
10.989	14.984	14.692	1.34
10.996	13.525	15.149	1.245
11.004	13.714	15.232	1.316
11.011	15.271	15.589	1.275
11.018	14.685	15.13	1.31
11.025	14.029	13.689	1.154
11.032	14.403	15.356	1.251
11.039	15.814	14.471	1.259
11.046	14.792	14.883	1.259
11.054	13.91	13.463	1.231
11.061	16.323	15.448	1.252
11.068	15.603	17.308	1.454
11.075	15.189	16.258	1.255
11.082	16.004	16.393	1.271
11.089	14.66	14.248	1.15
11.097	14.451	13.592	1.115
11.104	15.812	15.305	1.223
11.111	14.786	14.086	1.175
11.118	14.785	14.79	1.261
11.125	15.563	15.815	1.257
11.132	14.159	14.637	1.148
11.139	14.994	14.726	1.179
11.147	15.501	14.332	1.238
11.154	14.821	14.209	1.317
11.161	14.6	14.389	1.08
11.168	13.587	14.22	1.18
11.175	15.247	14.91	1.225
11.182	15.213	15.438	1.218
11.189	14.611	14.91	1.183
11.197	13.843	15.057	1.151
11.204	16.458	16.818	1.274
11.211	14.337	15.074	1.246
11.218	13.959	15.224	1.176
11.225	14.006	15.024	1.252
11.232	14.286	15.397	1.223
11.24	14.264	15.327	1.275
11.247	14.24	16.515	1.238
11.254	13.82	14.483	1.195
11.261	14.098	13.646	1.069
11.268	12.56	14.278	1.079
11.275	14.125	16.57	1.18
11.282	14.451	15.673	1.212
11.29	13.467	14.088	1.146
11.297	14.033	14.85	1.14
11.304	13.448	14.118	1.224
11.311	14.274	14.975	1.215
11.318	14.495	14.931	1.22
11.325	13.632	14.596	1.233
11.332	14.762	15.614	1.218
11.34	12.953	14.954	1.134
11.347	12.388	13.739	1.088
11.354	14.323	14.806	1.226
11.361	13.476	14.651	1.105
11.368	13.544	15.604	1.266
11.375	14.187	14.859	1.239
11.383	13.739	15.428	1.188
11.39	13.329	15.675	1.198
11.397	13.958	14.738	1.219
11.404	13.748	14.696	1.169
11.411	13.881	14.202	1.204
11.418	13.847	14.753	1.171
11.425	13.47	15.373	1.22
11.433	12.609	14.59	1.193
11.44	12.724	14.104	1.176
11.447	12.969	14.211	1.161
11.454	12.87	15.227	1.237
11.461	14.162	15.35	1.223
11.468	14.667	16.285	1.309
11.475	12.712	14.868	1.247
11.483	14.319	15.51	1.311
11.49	12.902	16.304	1.234
11.497	13.084	16.03	1.24
11.504	14.214	16.88	1.325
11.511	13.515	17.45	1.337
11.518	13.525	14.958	1.248
11.526	12.734	15.471	1.26
11.533	12.556	15.687	1.252
11.54	12.774	16.68	1.241
11.547	12.079	15.463	1.27
11.554	13.738	16.871	1.348
11.561	13.393	15.613	1.272
11.568	15.583	16.72	1.268
11.576	13.102	15.673	1.198
11.583	12.795	17.552	1.281
11.59	13.411	17.59	1.355
11.597	13.366	16.462	1.316
11.604	12.914	16.825	1.38
11.611	14.172	18.215	1.453
11.618	13.718	17.791	1.436
11.626	13.185	16.998	1.372
11.633	13.289	18.598	1.342
11.64	12.426	18.005	1.335
11.647	12.665	17.847	1.288
11.654	12.851	17.394	1.36
11.661	13.109	17.328	1.455
11.669	13.746	17.09	1.35
11.676	13.403	17.023	1.321
11.683	13.33	16.556	1.353
11.69	14.051	18.343	1.41
11.697	13.417	19.792	1.417
11.704	14.401	17.374	1.368
11.711	14.438	19.19	1.454
11.719	13.339	17.048	1.249
11.726	13.82	17.584	1.229
11.733	15.677	17.688	1.356
11.74	13.813	16.967	1.279
11.747	14.396	17.426	1.379
11.754	15.194	17.492	1.401
11.761	14.064	17.835	1.357
11.769	15.616	18.176	1.424
11.776	13.539	16.965	1.465
11.783	15.04	17.877	1.471
11.79	13.863	18.46	1.314
11.797	16.289	18.481	1.432
11.804	13.887	17.997	1.424
11.812	14.31	17.932	1.411
11.819	14.107	17.315	1.433
11.826	14.546	18.004	1.39
11.833	14.794	17.222	1.365
11.84	13.288	17.683	1.339
11.847	14.827	17.915	1.454
11.854	13.288	16.925	1.267
11.862	14.187	17.741	1.387
11.869	14.333	17.518	1.265
11.876	14.276	18.21	1.31
11.883	13.517	17.116	1.289
11.89	13.932	17.769	1.355
11.897	14.89	19.615	1.393
11.904	15.232	18.099	1.409
11.912	15.3	18.275	1.42
11.919	16.57	18.648	1.339
11.926	14.575	16.971	1.354
11.933	14.69	17.739	1.249
11.94	14.684	16.205	1.28
11.947	14.63	17.614	1.226
11.955	13.943	16.24	1.309
11.962	15.668	18.218	1.283
11.969	16.522	18.464	1.479
11.976	15.428	17.187	1.297
11.983	14.839	16.634	1.289
11.99	15.395	17.223	1.342
11.997	15.491	17.114	1.276
12.005	16.65	21.444	1.306
12.012	15.278	16.718	1.244
12.019	16.15	18.124	1.245
12.026	14.266	16.338	1.25
12.033	14.253	16.065	1.184
12.04	15.089	16.547	1.293
12.047	15.135	18.372	1.359
12.055	15.2	17.224	1.216
12.062	14.288	16.891	1.336
12.069	15.787	16.888	1.269
12.076	14.882	15.914	1.207
12.083	14.312	17.578	1.225
12.09	15.141	16.337	1.284
12.098	14.811	16.395	1.181
12.105	14.24	16.511	1.26
12.112	14.002	16.477	1.236
12.119	14.85	16.002	1.2
12.126	13.492	15.549	1.079
12.133	13.724	15.132	1.126
12.14	13.628	15.381	1.28
12.148	13.82	17.722	1.198
12.155	13.694	15.74	1.187
12.162	13.165	15.21	1.124
12.169	11.795	13.476	1.123
12.176	13.644	14.732	1.222
12.183	13.761	15.114	1.15
12.19	14.025	15.196	1.193
12.198	14.864	16.088	1.181
12.205	14.101	16.065	1.221
12.212	12.916	14.28	1.079
12.219	13.863	15.089	1.209
12.226	12.096	12.987	1.037
12.233	14.195	15.257	1.176
12.241	12.729	14.668	1.117
12.248	13.307	14.384	1.2
12.255	13.241	15.174	1.16
12.262	12.767	14.552	1.193
12.269	13.719	15.552	1.204
12.276	13.121	15.172	1.137
12.283	12.523	13.908	1.103
12.291	13.06	14.77	1.167
12.298	13.171	15.315	1.195
12.305	11.165	12.997	1.072
12.312	12.38	14.09	1.132
12.319	12.835	15.008	1.189
12.326	12.428	14.419	1.163
12.333	12.888	15.083	1.177
12.341	12.223	14.166	1.19
12.348	11.962	14.113	1.132
12.355	13.057	14.432	1.147
12.362	12.736	14.706	1.264
12.369	12.1	14.458	1.185
12.376	12.192	14.527	1.169
12.383	12.446	14.284	1.183
12.391	12.293	14.264	1.141
12.398	11.584	13.696	1.134
12.405	12.232	15.124	1.21
12.412	12.28	14.937	1.251
12.419	12.085	14.287	1.181
12.426	12.035	14.408	1.193
12.434	12.164	14.47	1.186
12.441	11.867	14.857	1.185
12.448	11.915	14.21	1.186
12.455	12.285	14.803	1.15
12.462	12.228	15.177	1.194
12.469	12.456	15.322	1.265
12.476	12.086	14.088	1.154
12.484	12.14	14.887	1.207
12.491	12.269	14.848	1.171
12.498	11.801	15.568	1.19
12.505	12.465	15.529	1.252
12.512	12.648	15.539	1.192
12.519	12.039	15.147	1.222
12.526	11.883	14.978	1.184
12.534	11.827	15.098	1.193
12.541	11.77	14.938	1.212
12.548	11.662	14.473	1.212
12.555	11.556	14.21	1.174
12.562	11.539	14.651	1.176
12.569	12.17	14.826	1.18
12.577	12.094	15.173	1.199
12.584	12.097	14.543	1.139
12.591	11.783	14.611	1.171
12.598	11.618	15.351	1.211
12.605	11.182	14.963	1.188
12.612	12.037	15.182	1.192
12.619	11.867	15.622	1.165
12.627	11.671	15.911	1.203
12.634	12.055	15.413	1.221
12.641	11.65	14.881	1.186
12.648	11.995	15.577	1.183
12.655	11.716	14.908	1.246
12.662	11.503	14.854	1.158
12.669	11.421	14.88	1.153
12.677	11.958	15.719	1.243
12.684	12.02	14.354	1.129
12.691	11.682	14.383	1.176
12.698	12.059	14.593	1.221
12.705	11.382	13.72	1.147
12.712	12.167	16.684	1.169
12.72	11.403	13.465	1.135
12.727	11.855	14.772	1.181
12.734	11.105	13.469	1.12
12.741	12.26	15.243	1.152
12.748	11.716	14.036	1.208
12.755	11.905	14.199	1.164
12.762	11.454	16.043	1.194
12.77	12.066	14.156	1.138
12.777	12.864	14.566	1.193
12.784	11.578	13.682	1.229
12.791	11.983	14.606	1.197
12.798	12.98	14.542	1.167
12.805	12.05	14.152	1.188
12.812	12.388	14.086	1.188
12.82	11.895	14.479	1.206
12.827	11.38	13.478	1.161
12.834	11.756	14.78	1.189
12.841	11.331	13.778	1.188
12.848	11.851	13.575	1.175
12.855	11.601	13.816	1.197
12.863	10.423	12.631	1.064
12.87	11.606	14.019	1.162
12.877	12.322	14.599	1.225
12.884	11.243	13.551	1.171
12.891	11.761	14.062	1.196
12.898	11.827	14.984	1.168
12.905	11.37	13.708	1.195
12.913	11.91	14.658	1.219
12.92	12.877	14.983	1.241
12.927	11.838	14.183	1.236
12.934	11.608	14.028	1.172
12.941	11.97	14.389	1.315
12.948	12.357	14.256	1.207
12.955	12.381	14.043	1.195
12.963	12.092	14.109	1.477
12.97	12.704	14.868	1.208
12.977	12.076	14.381	1.187
12.984	12.613	14.338	1.207
12.991	12.902	14.74	1.218
12.998	13.354	14.469	1.313
13.006	12.8	14.025	1.206
13.013	13.326	14.439	1.255
13.02	12.939	14.783	1.187
13.027	13.844	14.561	1.348
13.034	13.309	13.725	1.235
13.041	14.187	13.811	1.222
13.048	13.805	14.362	1.185
13.056	13.199	15.079	1.254
13.063	14.437	13.932	1.288
13.07	13.381	13.481	1.198
13.077	14.463	14.416	1.343
13.084	14.015	13.897	1.245
13.091	14.156	14.102	1.236
13.098	14.132	13.839	1.31
13.106	14.572	13.517	1.24
13.113	14.947	13.469	1.227
13.12	13.806	12.937	1.227
13.127	14.934	13.876	1.235
13.134	15.042	13.744	1.26
13.141	14.925	13.768	1.298
13.149	13.881	14.564	1.305
13.156	14.922	15.559	1.253
13.163	15.616	13.507	1.276
13.17	14.746	13.93	1.276
13.177	14.496	13.365	1.281
13.184	13.992	13.136	1.244
13.191	14.582	13.392	1.25
13.199	13.396	12.756	1.226
13.206	15.471	13.904	1.293
13.213	14.61	12.764	1.264
13.22	15.385	15.448	1.301
13.227	15.359	13.876	1.318
13.234	14.862	13.923	1.28
13.241	15.43	13.729	1.303
13.249	16.279	14.365	1.336
13.256	16.518	14.263	1.334
13.263	16.343	13.786	1.286
13.27	16.295	14.387	1.384
13.277	16.481	13.256	1.268
13.284	17.481	14.288	1.316
13.292	16.585	13.852	1.369
13.299	17.556	13.351	1.252
13.306	15.789	11.701	1.164
13.313	19.367	14.134	1.324
13.32	19.085	13.599	1.287
13.327	20.78	15.036	1.373
13.334	19.696	12.728	1.31
13.342	22.523	13.413	1.366
13.349	21.811	13.299	1.342
13.356	22.274	13.871	1.368
13.363	22.027	13.345	1.35
13.37	23.355	13.153	1.353
13.377	24.16	13.173	1.353
13.384	25.203	12.738	1.437
13.392	25.054	12.995	1.435
13.399	23.966	13.235	1.358
13.406	26.457	12.742	1.397
13.413	26.227	12.342	1.302
13.42	27.582	12.022	1.365
13.427	28.209	11.681	1.35
13.435	28.528	12.259	1.397
13.442	26.417	11.155	1.311
13.449	26.723	11.058	1.362
13.456	27.421	12.142	1.392
13.463	29.157	12.205	1.426
13.47	28.342	11.518	1.363
13.477	28.496	11.323	1.396
13.485	29.424	11.131	1.388
13.492	28.481	11.604	1.428
13.499	27.902	11.083	1.385
13.506	27.849	11.325	1.311
13.513	29.043	11.478	1.373
13.52	29.73	11.841	1.445
13.527	27.936	11.278	1.401
13.535	30.033	11.967	1.474
13.542	28.33	10.982	1.406
13.549	28.813	11.011	1.49
13.556	28.156	11.618	1.357
13.563	27.794	11.22	1.36
13.57	27.13	10.48	1.259
13.578	28.609	11.16	1.437
13.585	26.79	12.131	1.379
13.592	28.79	12.173	1.38
13.599	27.09	12.365	1.363
13.606	26.782	11.39	1.342
13.613	31.154	11.416	1.307
13.62	27.526	12.572	1.358
13.628	26.543	11.01	1.342
13.635	26.898	12.288	1.331
13.642	24.847	13.492	1.303
13.649	25.878	12.86	1.433
13.656	25.966	13.005	1.316
13.663	24.047	13.007	1.318
13.67	26.436	13.427	1.415
13.678	23.049	13.243	1.303
13.685	23.322	13.07	1.315
13.692	19.264	11.526	1.176
13.699	22.121	14.568	1.225
13.706	20.856	12.991	1.218
13.713	20.116	13.223	1.207
13.721	18.705	13.378	1.122
13.728	18.707	13.409	1.179
13.735	18.663	12.378	1.077
13.742	19.439	14.325	1.261
13.749	20.18	14.072	1.224
13.756	19.042	12.91	1.191
13.763	17.678	13.512	1.159
13.771	18.513	13.956	1.259
13.778	21.203	13.416	1.189
13.785	18.143	13.491	1.174
13.792	16.174	12.38	1.156
13.799	15.339	12.168	1.046
13.806	16.389	13.894	1.201
13.813	16.293	14.085	1.114
13.821	17.151	13.834	1.188
13.828	16.788	13.045	1.202
13.835	15.378	12.403	1.088
13.842	16.894	13.242	1.236
13.849	14.753	12.607	1.106
13.856	16.321	13.657	1.135
13.864	15.555	13.698	1.179
13.871	14.892	14.117	1.069
13.878	15.371	12.776	1.263
13.885	16.877	14.408	1.15
13.892	15.601	12.896	1.163
13.899	15.159	13.029	1.114
13.906	15.38	12.411	1.109
13.914	14.531	12.348	1.185
13.921	15.331	12.426	1.137
13.928	14.885	13.38	1.141
13.935	17.356	13.014	1.193
13.942	14.391	12.498	1.236
13.949	15.407	12.288	1.125
13.956	14.711	13.347	1.107
13.964	15.744	12.232	1.137
13.971	15.746	13.212	1.148
13.978	14.845	12.014	1.161
13.985	14.405	12.509	1.166
13.992	14.974	12.498	1.071
13.999	14.702	13.315	1.131
14.007	14.826	12.557	1.243
14.014	14.13	12.027	1.126
14.021	13.45	12.247	1.082
14.028	13.697	11.335	1.197
14.035	13.034	11.321	1.047
14.042	13.862	12.166	1.089
14.049	14.28	12.238	1.171
14.057	13.889	12.569	1.233
14.064	13.901	12.217	1.217
14.071	13.595	14.072	1.073
14.078	13.556	13.126	1.163
14.085	13.97	11.662	1.168
14.092	13.936	12.778	1.116
14.099	13.424	11.855	1.192
14.107	13.794	11.95	1.157
14.114	13.981	12.252	1.161
14.121	12.32	12.044	1.075
14.128	12.708	11.556	1.183
14.135	13.311	11.747	1.163
14.142	11.943	11.43	1.101
14.15	13.338	11.953	1.17
14.157	12.248	12.027	1.109
14.164	13.193	10.96	1.065
14.171	13.641	12.524	1.152
14.178	14.476	13.085	1.118
14.185	12.071	11.741	1.079
14.192	12.883	12.071	1.123
14.2	11.998	11.976	1.071
14.207	13.74	12.923	1.086
14.214	13.013	11.887	1.167
14.221	12.589	11.896	1.136
14.228	12.63	11.448	1.159
14.235	13.415	11.687	1.198
14.242	16.049	12.048	1.292
14.25	13.292	12.287	1.18
14.257	11.957	11.45	1.084
14.264	12.591	11.616	1.107
14.271	13.591	11.724	1.14
14.278	12.935	11.862	1.297
14.285	13.763	11.727	1.132
[truncated: 523 more rows]

## Sheet: 11R
Distance from commissure [mm]	Mg/Ca [mmol/mol]	Na/Ca [mmol/mol]	Sr/Ca [mmol/mol]
6.294e-10	21.746	19.729	1.079
0.007	19.706	19.509	1.107
0.014	19.063	19.721	1.058
0.021	18.995	20.009	1.117
0.029	18.267	19.335	1.05
0.036	19.071	19.937	1.091
0.043	21.068	19.57	1.021
0.05	18.346	19.888	1.109
0.057	19.814	20.411	1.033
0.064	18.706	19.375	1.049
0.071	16.447	18.734	0.967
0.079	17.974	20.029	1.041
0.086	17.883	19.904	1.069
0.093	17.443	19.367	0.975
0.1	17.785	19.751	0.991
0.107	17.367	22.81	1.117
0.114	16.636	19.824	1.024
0.122	16.876	19.622	1.004
0.129	17.106	19.712	0.998
0.136	17.074	19.232	1.003
0.143	16.577	20.67	1.009
0.15	16.712	19.778	1.049
0.157	16.835	20.302	1.028
0.164	16.733	19.778	1.015
0.172	16.49	19.944	1.045
0.179	16.374	19.492	1.142
0.186	16.512	19.769	1.005
0.193	16.26	19.584	1.008
0.2	16.914	19.641	1.031
0.207	16.585	19.623	1.009
0.214	16.207	19.598	1
0.222	16.887	19.3	1.004
0.229	16.579	18.961	0.993
0.236	17.11	19.638	1.019
0.243	17.425	19.598	1.069
0.25	16.928	19.207	1.006
0.257	17.27	19.671	1.009
0.265	17.22	18.734	0.995
0.272	18.088	19.655	1.023
0.279	17.119	19.212	1.01
0.286	17.706	19.445	1.057
0.293	17.024	18.759	0.99
0.3	17.774	19.844	1.035
0.307	17.737	19.509	1.037
0.315	18.334	19.885	1.031
0.322	17.674	19.733	1.031
0.329	18.033	19.927	1.053
0.336	17.607	20.286	1.028
0.343	17.779	19.582	1
0.35	18.966	21.161	1.038
0.357	17.881	20.143	1.033
0.365	17.769	19.685	1.025
0.372	18.32	20.18	1.018
0.379	16.823	19.008	0.994
0.386	17.83	20.213	1.05
0.393	17.709	20.138	1.033
0.4	17.812	20.335	1.038
0.408	17.447	19.656	1.009
0.415	17.63	20.398	1.053
0.422	17.626	20.532	1.071
0.429	17.72	21.028	1.027
0.436	16.902	19.402	1.008
0.443	17.175	19.966	1.025
0.45	17.315	19.936	1.022
0.458	17.304	19.704	1.019
0.465	17.373	20.416	1.024
0.472	16.97	20.237	1.027
0.479	17.049	20.436	1.077
0.486	17.631	20.408	1.035
0.493	17.581	20.449	1.073
0.5	18.095	20.395	1.069
0.508	17.438	20.134	1.033
0.515	16.529	19.218	0.999
0.522	17.517	20.256	1.053
0.529	18.496	20.598	1.067
0.536	17.443	20.551	1.063
0.543	17.561	20.777	1.049
0.551	17.305	20.397	1.155
0.558	17.18	20.47	1.049
0.565	16.922	20.578	1.101
0.572	16.957	20.221	1.048
0.579	16.432	19.493	1.013
0.586	17.182	21.013	1.071
0.593	17.03	20.761	1.11
0.601	16.369	20.083	1.018
0.608	16.871	21.222	1.091
0.615	16.865	20.638	1.064
0.622	15.69	19.507	1.084
0.629	16.552	20.863	1.129
0.636	15.969	20.779	1.082
0.643	16.742	20.83	1.084
0.651	16.411	21.005	1.066
0.658	16.751	21.087	1.088
0.665	16.266	20.453	1.074
0.672	15.825	20.135	1.089
0.679	15.763	20.98	1.073
0.686	16.132	21.481	1.215
0.694	15.599	21.08	1.08
0.701	15.921	21.441	1.093
0.708	15.615	21.385	1.093
0.715	16.024	21.476	1.087
0.722	15.812	21.295	1.109
0.729	15.258	21.581	1.09
0.736	15.104	21.509	1.137
0.744	15.552	21.495	1.088
0.751	15.421	21.859	1.108
0.758	15.261	21.838	1.122
0.765	15.388	23.751	1.105
0.772	15.168	21.213	1.073
0.779	15.174	21.674	1.088
0.786	14.949	21.673	1.093
0.794	15.69	21.963	1.131
0.801	15.956	22.26	1.148
0.808	15.191	22.163	1.142
0.815	15.135	21.911	1.13
0.822	15.12	22.155	1.139
0.829	14.949	22.343	1.135
0.837	15.12	22.321	1.09
0.844	15.009	22.647	1.118
0.851	14.888	23.603	1.129
0.858	15.083	22.845	1.133
0.865	15.093	22.746	1.115
0.872	15.204	23.079	1.153
0.879	14.351	23.673	1.111
0.887	14.707	22.419	1.101
0.894	15.041	23.091	1.163
0.901	14.983	23.035	1.125
0.908	14.835	23.064	1.156
0.915	14.79	23.121	1.151
0.922	14.773	22.912	1.131
0.929	14.448	22.246	1.09
0.937	14.981	22.902	1.143
0.944	15.055	22.761	1.125
0.951	14.691	22.718	1.103
0.958	15.189	23.591	1.148
0.965	15.169	23.704	1.112
0.972	15.062	22.654	1.125
0.98	14.802	22.364	1.138
0.987	15.288	22.522	1.095
0.994	15.035	22.592	1.096
1.001	15.202	22.749	1.176
1.008	15.228	22.324	1.106
1.015	15.523	22.557	1.105
1.022	15.623	22.739	1.13
1.03	15.902	22.567	1.094
1.037	15.508	22.201	1.087
1.044	15.63	22.354	1.106
1.051	15.211	22.22	1.103
1.058	15.617	22.642	1.089
1.065	15.927	22.599	1.093
1.072	16.393	23.065	1.143
1.08	15.857	22.624	1.116
1.087	16.156	22.05	1.098
1.094	15.443	22.049	1.06
1.101	16.074	22.337	1.084
1.108	16.349	22.163	1.132
1.115	16.953	22.93	1.135
1.123	15.52	21.792	1.088
1.13	16.136	22.045	1.1
1.137	16.588	22.271	1.101
1.144	16.643	22.15	1.132
1.151	16.201	21.675	1.074
1.158	16.292	22.113	1.085
1.165	16.866	22.043	1.088
1.173	16.812	21.885	1.068
1.18	17.355	22.145	1.089
1.187	17.259	21.917	1.082
1.194	16.994	22.121	1.056
1.201	17.331	21.637	1.075
1.208	17.774	21.385	1.08
1.215	18	22	1.088
1.223	18.398	22.107	1.089
1.23	18.403	22.033	1.085
1.237	18.265	21.732	1.078
1.244	18.972	21.872	1.095
1.251	18.363	21.743	1.084
1.258	18.89	21.985	1.081
1.266	19.018	21.628	1.054
1.273	18.865	21.825	1.082
1.28	19.468	21.746	1.058
1.287	19.944	22	1.103
1.294	20.042	22.209	1.082
1.301	20.19	22.302	1.088
1.308	19.985	21.578	1.063
1.316	20.484	21.818	1.072
1.323	20.648	21.514	1.079
1.33	20.507	22.02	1.07
1.337	20.345	20.88	1.045
1.344	20.801	20.961	1.061
1.351	20.444	20.567	1.025
1.358	21.036	20.867	1.041
1.366	20.826	21.339	1.044
1.373	20.828	20.983	1.043
1.38	20.759	20.919	1.026
1.387	21.281	20.99	1.047
1.394	21.319	21.113	1.107
1.401	21.217	20.684	1.005
1.408	21.655	21.476	1.053
1.416	21.382	21.175	1.036
1.423	21.143	20.824	1.023
1.43	21.589	21.38	1.046
1.437	21.484	21.511	1.024
1.444	21.632	21.562	1.029
1.451	21.852	21.602	1.057
1.459	20.844	20.707	1.006
1.466	21.226	20.559	1.015
1.473	21.509	21.11	1.02
1.48	20.981	21.073	0.996
1.487	20.982	21.324	1.034
1.494	20.77	21.009	1.042
1.501	21.117	21.318	1.041
1.509	21.262	21.275	1.035
1.516	21.632	20.79	1.005
1.523	21.025	21.205	1.041
1.53	20.923	21.434	1.015
1.537	20.507	21.026	1.029
1.544	20.575	20.782	1.012
1.551	20.385	20.993	1.019
1.559	21.136	21.477	1.027
1.566	21.252	22.971	1.034
1.573	21.193	21.587	1.053
1.58	20.884	21.23	1.013
1.587	20.55	20.592	0.991
1.594	20.45	20.909	1.007
1.602	20.251	20.836	1.033
1.609	21.033	21.198	1.035
1.616	20.574	20.813	1.02
1.623	19.556	20.294	1.001
1.63	21.178	21.161	1.04
1.637	20.816	21.366	1.056
1.644	21.072	21.365	1.054
1.652	20.079	21.138	1.029
1.659	20.825	21.044	1.037
1.666	20.136	21.207	1.081
1.673	20.352	20.955	1.042
1.68	20.277	21.83	1.054
1.687	20.051	20.948	1.046
1.694	20.515	21.25	1.056
1.702	20.593	21.555	1.06
1.709	20.515	21.294	1.055
1.716	20.067	21.388	1.047
1.723	20.248	21.213	1.045
1.73	20.059	21.294	1.046
1.737	20.74	21.787	1.082
1.745	20.035	21.258	1.055
1.752	19.969	21.253	1.056
1.759	20.449	21.331	1.076
1.766	20.045	21.401	1.051
1.773	20.311	21.515	1.072
1.78	20.044	21.326	1.053
1.787	19.588	21.474	1.047
1.795	20.111	21.881	1.073
1.802	20.085	22.301	1.068
1.809	20.135	21.564	1.054
1.816	19.954	21.817	1.083
1.823	19.562	21.499	1.051
1.83	19.622	21.827	1.07
1.837	19.563	21.851	1.091
1.845	20.099	22.178	1.079
1.852	19.036	21.994	1.064
1.859	19.707	23.116	1.079
1.866	18.918	21.531	1.045
1.873	19.191	22.242	1.071
1.88	19.543	22.76	1.085
1.888	19.181	22.337	1.075
1.895	18.974	22.123	1.065
1.902	19.403	22.749	1.105
1.909	18.883	22.586	1.062
1.916	18.95	22.376	1.073
1.923	19.149	22.605	1.073
1.93	18.797	22.564	1.056
1.938	18.546	22.126	1.073
1.945	18.867	22.483	1.097
1.952	19.071	22.778	1.082
1.959	18.501	22.538	1.068
1.966	18.857	22.492	1.053
1.973	18.639	22.296	1.063
1.98	18.301	22.716	1.066
1.988	18.595	22.504	1.088
1.995	18.192	22.618	1.071
2.002	18.927	22.73	1.064
2.009	18.7	22.785	1.065
2.016	18.526	22.512	1.047
2.023	18.381	22.738	1.059
2.031	17.918	22.503	1.013
2.038	18.358	23.043	1.082
2.045	18.232	22.67	1.048
2.052	17.931	22.689	1.054
2.059	17.767	22.576	1.051
2.066	17.659	22.408	1.035
2.073	17.41	22.401	1.036
2.081	17.752	23.299	1.063
2.088	17.791	23.296	1.068
2.095	17.215	23.088	1.059
2.102	17.732	22.969	1.068
2.109	17.172	23.151	1.049
2.116	17.255	23.296	1.062
2.123	17.719	23.746	1.074
2.131	17.156	23.456	1.064
2.138	16.954	23.497	1.054
2.145	17.34	23.971	1.078
2.152	17.136	23.973	1.075
2.159	16.863	23.534	1.031
2.166	17.094	24.233	1.078
2.174	16.606	24.138	1.082
2.181	16.727	23.85	1.056
2.188	16.675	24.252	1.071
2.195	16.625	24.621	1.068
2.202	16.64	24.005	1.061
2.209	16.762	24.23	1.067
2.216	16.243	24.233	1.077
2.224	16.433	24.632	1.089
2.231	16.683	24.403	1.068
2.238	16.63	25.011	1.107
2.245	16.592	24.367	1.088
2.252	16.246	24.991	1.09
2.259	16.098	24.647	1.079
2.266	16.38	24.937	1.088
2.274	16.587	25.373	1.114
2.281	16.085	24.545	1.094
2.288	15.901	24.391	1.079
2.295	15.857	24.685	1.083
2.302	16.139	24.656	1.077
2.309	16.214	25.228	1.114
2.317	16.06	25.563	1.118
2.324	15.869	25.065	1.103
2.331	15.828	25.091	1.106
2.338	15.492	24.85	1.1
2.345	15.634	25.244	1.099
2.352	15.884	25.393	1.127
2.359	15.39	24.663	1.109
2.367	15.377	25.385	1.093
2.374	15.305	25.002	1.135
2.381	15.179	25.269	1.118
2.388	15.43	25.593	1.105
2.395	15.452	25.257	1.083
2.402	15.024	25.341	1.097
2.409	15.087	25.899	1.091
2.417	15.322	26.15	1.13
2.424	15.472	25.958	1.111
2.431	15.246	26.342	1.129
2.438	15.266	26.166	1.114
2.445	15.721	25.869	1.136
2.452	15.38	26.252	1.115
2.46	15.464	26.458	1.105
2.467	15.533	26.448	1.111
2.474	14.379	25.795	1.093
2.481	15.148	26.763	1.107
2.488	15.155	26.548	1.129
2.495	14.561	25.973	1.103
2.502	14.677	26.872	1.128
2.51	14.652	26.527	1.122
2.517	14.837	26.829	1.118
2.524	15.084	27.339	1.12
2.531	14.998	26.811	1.108
2.538	14.877	27.447	1.131
2.545	14.835	27.201	1.122
2.552	15.347	27.717	1.11
2.56	14.601	27.163	1.106
2.567	15.187	27.674	1.119
2.574	15.202	27.503	1.126
2.581	14.948	26.997	1.113
2.588	14.707	27.079	1.112
2.595	14.706	27.281	1.133
2.603	14.344	26.341	1.085
2.61	14.681	26.835	1.083
2.617	14.686	27.162	1.097
2.624	14.833	26.9	1.104
2.631	14.593	27.638	1.1
2.638	14.851	26.757	1.099
2.645	15.314	27.811	1.139
2.653	14.796	26.238	1.084
2.66	15.135	27.222	1.1
2.667	15.098	27.185	1.117
2.674	14.871	27.152	1.099
2.681	15.13	27.185	1.092
2.688	14.862	26.737	1.125
2.695	14.67	26.593	1.102
2.703	14.998	26.781	1.09
2.71	15.118	26.671	1.093
2.717	15.24	27.39	1.083
2.724	15.343	27.331	1.096
2.731	15.406	26.942	1.118
2.738	15.327	27.142	1.082
2.745	15.287	26.898	1.095
2.753	15.506	26.854	1.099
2.76	14.899	26.624	1.058
2.767	15.664	27.244	1.097
2.774	15.347	26.578	1.093
2.781	15.098	25.994	1.068
2.788	15.56	27.62	1.11
2.796	15.401	26.407	1.091
2.803	15.651	27.134	1.105
2.81	16.295	27.433	1.147
2.817	15.699	26.742	1.115
2.824	15.92	26.413	1.094
2.831	15.455	26.055	1.101
2.838	15.844	26.227	1.096
2.846	16.272	26.445	1.124
2.853	15.846	26.423	1.121
2.86	15.854	26.106	1.083
2.867	16.571	26.597	1.123
2.874	16.573	26.597	1.13
2.881	16.375	27.125	1.158
2.888	16.4	26.096	1.122
2.896	16.151	25.964	1.12
2.903	16.214	26.319	1.155
2.91	16.106	26.848	1.136
2.917	16.145	26.514	1.169
2.924	16.186	28.915	1.131
2.931	16.251	26.231	1.143
2.939	16.149	26.67	1.188
2.946	16.056	26.512	1.144
2.953	16.166	26.654	1.226
2.96	15.861	26.282	1.153
2.967	15.99	26.322	1.142
2.974	15.803	26.398	1.148
2.981	15.89	26.449	1.196
2.989	16.556	27.281	1.295
2.996	15.815	26.693	1.163
3.003	15.553	25.481	1.167
3.01	14.051	22.336	1.033
3.017	15.602	27.13	1.235
3.024	17.16	29.125	1.173
3.031	15.566	27.26	1.212
3.039	15.349	26.87	1.183
3.046	15.257	26.723	1.215
3.053	15.146	28.214	1.157
3.06	15.883	26.418	1.142
3.067	15.14	26.889	1.16
3.074	14.795	26.285	1.162
3.082	14.932	26.665	1.176
3.089	15.348	26.778	1.178
3.096	15.924	26.028	1.198
3.103	15.437	26.846	1.196
3.11	15.463	26.705	1.199
3.117	14.15	25.979	1.171
3.124	14.315	26.822	1.177
3.132	14.282	26.035	1.18
3.139	14.894	26.411	1.168
3.146	13.784	26.71	1.185
3.153	13.811	26.794	1.202
3.16	13.579	26.536	1.186
3.167	13.137	26.364	1.232
3.174	13.101	26.428	1.167
3.182	12.623	26.402	1.193
3.189	13.62	26.449	1.219
3.196	12.783	27.4	1.168
3.203	12.157	26.773	1.177
3.21	12.455	27.488	1.173
3.217	12.118	26.502	1.196
3.225	12.235	28.216	1.203
3.232	12.128	26.784	1.156
3.239	12.311	27.028	1.167
3.246	12.097	27.266	1.178
3.253	11.786	26.838	1.167
3.26	12.189	27.235	1.18
3.267	11.664	25.436	1.135
3.275	11.782	25.921	1.167
3.282	11.844	26.437	1.205
3.289	11.723	25.486	1.145
3.296	11.706	26.08	1.199
3.303	11.899	25.7	1.173
3.31	11.459	25.036	1.134
3.317	11.367	25.148	1.155
3.325	11.932	25.406	1.142
3.332	11.859	26.048	1.209
3.339	10.858	23.815	1.099
3.346	11.622	25.088	1.174
3.353	11.827	25.367	1.195
3.36	11.593	25.404	1.184
3.368	11.559	26.081	1.207
3.375	11.658	26.486	1.198
3.382	11.289	25.363	1.179
3.389	11.413	24.395	1.139
3.396	11.257	25.046	1.204
3.403	11.115	24.454	1.132
3.41	11.252	25.793	1.182
3.418	11.494	24.619	1.152
3.425	11.229	24.848	1.205
3.432	10.586	23.952	1.141
3.439	11.254	24.517	1.159
3.446	10.506	23.762	1.158
3.453	10.742	23.991	1.181
3.46	10.76	25.363	1.195
3.468	11.235	24.766	1.17
3.475	11.447	26.034	1.248
3.482	11.758	25.498	1.2
3.489	11.022	24.471	1.234
3.496	10.204	24.288	1.117
3.503	10.75	24.722	1.183
3.511	10.638	25.249	1.138
3.518	10.797	25.38	1.254
3.525	10.792	24.657	1.195
3.532	10.512	24.071	1.131
3.539	10.704	24.36	1.142
3.546	10.984	25.488	1.176
3.553	12.093	26.727	1.254
3.561	11.521	24.525	1.184
3.568	11.241	25.367	1.182
3.575	10.992	25.282	1.202
3.582	11.195	24.3	1.149
3.589	11.467	24.494	1.192
3.596	12.037	25.71	1.241
3.603	11.694	24.848	1.134
3.611	11.488	25.293	1.19
3.618	10.113	21.944	0.99
3.625	11.179	24.263	1.187
3.632	12.137	25.316	1.243
3.639	12.014	25.37	1.185
3.646	12.227	24.844	1.164
3.654	11.564	24.688	1.119
3.661	12.948	27.325	1.151
3.668	12.292	25.046	1.04
3.675	11.821	21.639	0.988
3.682	13.564	24.638	1.125
3.689	14.394	25.07	1.116
3.696	15.495	24.512	1.087
3.704	16.432	24.94	1.14
3.711	17.176	24.586	1.132
3.718	17.515	24.614	1.103
3.725	19.562	23.484	1.115
3.732	18.99	22.499	1.127
3.739	21.021	23.344	1.148
3.746	22.383	25.927	1.18
3.754	23.721	22.222	1.133
3.761	23.171	23.042	1.148
3.768	26.687	22.458	1.205
3.775	25.805	23.236	1.228
3.782	25.997	22.857	1.211
3.789	29.271	22.227	1.183
3.797	26.266	20.709	1.211
3.804	27.658	22.94	1.202
3.811	31.535	21.427	1.23
3.818	29.61	23.403	1.238
3.825	28.866	20.839	1.212
3.832	29.919	22.906	1.218
3.839	30.406	21.23	1.319
3.847	30.518	21.273	1.264
3.854	27.98	20.671	1.191
3.861	27.295	21.348	1.215
3.868	31.051	20.972	1.309
3.875	25.575	19.503	1.194
3.882	26.047	21.419	1.254
3.889	27.799	21.969	1.3
3.897	26.542	22.748	1.303
3.904	27.361	23.34	1.385
3.911	25.153	22.415	1.268
3.918	24.094	23.284	1.233
3.925	23.237	25.498	1.296
3.932	22.998	22.96	1.279
3.94	22.238	23.221	1.325
3.947	18.686	21.558	1.157
3.954	19.114	22.321	1.205
3.961	20.596	24.433	1.3
3.968	19.044	23.826	1.281
3.975	17.976	23.279	1.192
3.982	18.461	24.017	1.239
3.99	17.381	23.529	1.229
3.997	17.777	24.2	1.277
4.004	16.862	23.75	1.28
4.011	16.715	25.631	1.266
4.018	15.919	24.375	1.183
4.025	16.216	26.913	1.23
4.032	16.098	26.454	1.276
4.04	16.561	24.443	1.216
4.047	16.104	27.473	1.296
4.054	14.364	25.072	1.244
4.061	14.62	27.089	1.223
4.068	15.096	26.922	1.357
4.075	14.914	25.919	1.3
4.082	13.652	24.231	1.128
4.09	14.772	25.254	1.253
4.097	17.924	27.546	1.207
4.104	15.211	27.421	1.266
4.111	16.088	28.033	1.323
4.118	15.928	29.282	1.253
4.125	15.046	23.815	1.049
4.133	15.49	28.482	1.313
4.14	14.98	26.133	1.267
4.147	16.091	27.633	1.173
4.154	14.92	26.338	1.261
4.161	15.838	27.247	1.189
4.168	16.433	26.663	1.191
4.175	17.225	26.711	1.24
4.183	17.298	28.331	1.213
4.19	16.775	27.797	1.191
4.197	18.258	27.286	1.366
4.204	17.583	28.239	1.259
4.211	17.289	27.631	1.264
4.218	17.187	27.281	1.219
4.225	16.783	27.753	1.305
4.233	18.193	26.581	1.245
4.24	15.833	24.703	1.184
4.247	16.938	27.218	1.247
4.254	17.867	26.933	1.199
4.261	16.134	23.976	1.144
4.268	18.745	27.483	1.331
4.276	16.496	25.314	1.236
4.283	17.114	27.132	1.276
4.29	17.133	26.357	1.281
4.297	18.948	26.513	1.306
4.304	18.178	25.49	1.263
4.311	18.589	27.322	1.37
4.318	17.394	26.678	1.311
4.326	16.501	25.325	1.298
4.333	17.715	26.021	1.248
4.34	16.733	27.307	1.301
4.347	17.244	26.501	1.265
4.354	17.196	26.744	1.397
4.361	17.093	26.655	1.261
4.368	15.257	26.1	1.216
4.376	19.583	27.174	1.327
4.383	15.272	26.829	1.19
4.39	16.225	27.029	1.42
4.397	15.571	26.217	1.299
4.404	16.508	27.193	1.412
4.411	13.722	24.22	1.18
4.419	15.838	27.307	1.367
4.426	16.708	28.451	1.392
4.433	14.566	26.388	1.344
4.44	15.788	25.774	1.45
4.447	14.545	25.447	1.26
4.454	14.844	27.344	1.293
4.461	13.627	25.052	1.269
4.469	14.513	26.569	1.315
4.476	14.343	26.357	1.32
4.483	16.149	27.069	1.422
4.49	15.249	26.067	1.247
4.497	15.155	26.217	1.251
4.504	14.465	24.124	1.232
4.511	14.828	27.151	1.312
4.519	14.64	26.824	1.264
4.526	14.086	24.507	1.202
4.533	15.17	27.067	1.3
4.54	14.724	26.248	1.264
4.547	15.34	25.994	1.323
4.554	14.581	25.469	1.208
4.562	15.65	26.899	1.266
4.569	15.1	26.479	1.259
4.576	15.265	25.502	1.256
4.583	15.345	25.854	1.271
4.59	15.165	32.422	1.359
4.597	15.892	24.514	1.199
4.604	14.384	25.691	1.274
4.612	15.227	27.269	1.302
4.619	16.372	27.225	1.323
4.626	16.288	26.136	1.282
4.633	15.516	27.011	1.267
4.64	14.272	25.291	1.233
4.647	15.204	23.761	1.155
4.654	14.872	24.045	1.275
4.662	16.925	26.107	1.331
4.669	14.117	26.007	1.253
4.676	15.244	25.432	1.402
4.683	15.571	24.875	1.265
4.69	15.844	27.93	1.246
4.697	14.73	24.862	1.219
4.705	15.815	26.088	1.256
4.712	15.839	25.996	1.212
4.719	15.358	27.695	1.279
4.726	15.398	26.514	1.248
4.733	14.48	24.51	1.213
4.74	15.983	26.974	1.425
4.747	15.895	26.386	1.477
4.755	15.449	25.882	1.244
4.762	15.323	26.71	1.29
4.769	14.76	25.021	1.209
4.776	15.269	26.793	1.269
4.783	15.015	27.154	1.254
4.79	15.133	26.089	1.222
4.797	16.56	26.497	1.325
4.805	14.956	24.404	1.191
4.812	15.856	26.76	1.306
4.819	17.796	26.543	1.335
4.826	16.716	26.154	1.306
4.833	15.961	28.865	1.322
4.84	16.614	26.927	1.314
4.848	15.328	25.3	1.294
4.855	15.204	24.55	1.225
4.862	15.739	26.324	1.27
4.869	16.553	26.586	1.254
4.876	15.51	26.782	1.46
4.883	15.085	28.324	1.393
4.89	16.495	25.553	1.308
4.898	15.571	28.394	1.336
4.905	15.848	26.479	1.261
4.912	15.45	26.85	1.323
4.919	16.099	27.341	1.294
4.926	16.021	26.624	1.379
4.933	14.85	25.493	1.28
4.94	16.134	27.109	1.232
4.948	15.575	26.682	1.25
4.955	16.612	27.026	1.244
4.962	16.228	28.203	1.248
4.969	16.762	26.925	1.293
4.976	16.279	26.654	1.231
4.983	15.483	26.761	1.28
4.991	15.573	25.945	1.221
4.998	16.019	26.907	1.228
5.005	16.093	25.494	1.237
5.012	15.625	24.48	1.154
5.019	16.278	25.009	1.213
5.026	15.319	25.852	1.215
5.033	14.818	24.478	1.159
5.041	15.868	25.397	1.205
5.048	15.607	24.746	1.139
5.055	16.621	24.207	1.258
5.062	15.727	23.919	1.25
5.069	16.385	23.498	1.165
5.076	16.33	24.369	1.35
5.083	17.098	24.045	1.168
5.091	18.042	24.538	1.212
5.098	20.102	22.804	1.164
5.105	18.685	22.098	1.233
5.112	17.991	21.042	1.072
5.119	20.688	21.591	1.131
5.126	20.934	21.507	1.126
5.133	21.51	22.061	1.196
5.141	23.282	22.187	1.161
5.148	22.668	20.456	1.121
5.155	26.045	21.13	1.162
5.162	25.386	20.376	1.136
5.169	26.095	20.566	1.129
5.176	27.079	19.863	1.109
5.184	27.186	19.732	1.119
5.191	28.648	19.911	1.115
5.198	29.923	19.236	1.103
5.205	31.418	19.663	1.141
5.212	31.6	19.112	1.118
5.219	33.232	19.593	1.167
5.226	35.888	19.627	1.188
5.234	36.179	19.435	1.212
5.241	37.87	19.587	1.243
5.248	39.914	19.661	1.258
5.255	44.332	19.661	1.292
5.262	42.214	19.052	1.279
5.269	41.05	18.786	1.269
5.277	41.238	18.718	1.246
5.284	43.206	19.02	1.322
5.291	43.516	18.704	1.322
5.298	43.284	18.818	1.381
5.305	44.875	18.337	1.42
5.312	43.735	17.757	1.385
5.319	46.099	18.676	1.43
5.327	42.817	17.576	1.395
5.334	43.247	18.028	1.424
5.341	41.163	17.744	1.39
5.348	40.519	17.614	1.385
5.355	39.961	18.113	1.356
5.362	38.332	17.569	1.306
5.369	37.214	17.652	1.286
5.377	36.581	18.118	1.318
5.384	35.131	18.22	1.252
5.391	33.125	18.318	1.166
5.398	31.311	18.487	1.134
5.405	29.485	18.454	1.095
5.412	30.074	18.559	1.106
5.419	30.187	18.906	1.138
5.427	30.257	19.338	1.136
5.434	29.485	17.95	1.08
5.441	31.463	18.689	1.151
5.448	31.652	18.685	1.158
5.455	31.325	17.823	1.16
5.462	31.537	18.711	1.182
5.47	34.768	18.93	1.238
5.477	36.85	19.183	1.228
5.484	38.841	20.025	1.278
5.491	40.408	20.441	1.338
5.498	39.413	20.436	1.278
5.505	38.358	21.185	1.344
5.512	37.206	21.124	1.341
5.52	40.317	22.373	1.515
5.527	40.963	21.563	1.559
5.534	41.893	20.427	1.615
5.541	45.249	20.29	1.686
5.548	47.2	19.311	1.779
5.555	48.261	18.446	1.74
5.562	47.938	17.508	1.708
5.57	46.457	16.884	1.627
5.577	47.945	17.508	1.679
5.584	46.43	17.616	1.607
5.591	45.22	17.573	1.524
5.598	42.383	17.786	1.478
5.605	39.199	18.117	1.425
5.613	37.093	19.021	1.36
5.62	34.213	19.873	1.354
5.627	31.537	20.722	1.278
5.634	28.399	20.928	1.229
5.641	25.856	21.75	1.21
5.648	23.591	22.2	1.197
5.655	22.306	23.062	1.168
5.663	20.915	23.386	1.133
5.67	20.395	23.942	1.116
5.677	19.277	23.973	1.134
5.684	17.83	22.777	1.091
5.691	17.691	23.562	1.116
5.698	17.996	23.554	1.098
5.705	16.832	23.625	1.113
5.713	16.882	23.208	1.1
5.72	16.573	23.623	1.112
5.727	16.518	24.332	1.115
5.734	16.299	23.918	1.11
5.741	16.308	23.762	1.114
5.748	16.461	24.084	1.109
5.756	16.617	24.197	1.115
5.763	16.784	23.858	1.132
5.77	16.711	23.873	1.119
5.777	16.625	23.607	1.106
5.784	17.362	24.459	1.124
5.791	17.134	23.713	1.105
5.798	17.237	23.691	1.094
5.806	17.038	23.067	1.099
5.813	17.904	23.164	1.098
5.82	19.342	23.59	1.119
5.827	18.758	22.716	1.093
5.834	19.423	22.509	1.103
5.841	20.6	22.35	1.108
5.848	20.991	22.258	1.085
5.856	22.768	21.598	1.101
5.863	24.419	21.141	1.1
5.87	25.054	20.777	1.132
5.877	27.916	20.989	1.164
5.884	27.84	20.005	1.155
5.891	29.502	19.63	1.152
5.899	30.813	19.057	1.169
5.906	32.318	19.636	1.201
5.913	33.493	18.819	1.217
5.92	35.103	18.943	1.217
5.927	36.319	18.837	1.254
5.934	36.998	18.485	1.318
5.941	36.924	18.323	1.279
5.949	37.874	17.622	1.296
5.956	39.132	18.429	1.319
5.963	39.94	17.827	1.321
5.97	40.138	17.863	1.367
5.977	40.81	18.106	1.367
5.984	40.254	18.129	1.351
5.991	38.722	18.272	1.307
5.999	37.871	18.773	1.308
6.006	37.281	19.296	1.285
6.013	36.119	19.728	1.274
6.02	34.313	20.342	1.271
6.027	33.614	20.639	1.245
6.034	34.255	21.345	1.214
6.042	28.395	21.229	1.157
6.049	25.75	21.527	1.144
6.056	25.181	21.795	1.16
6.063	24.96	22.504	1.149
6.07	22.615	22.418	1.119
6.077	22.274	22.193	1.108
6.084	20.961	22.003	1.091
6.092	21.25	21.909	1.087
6.099	21.121	22.729	1.094
6.106	19.866	22.227	1.072
6.113	19.495	22.499	1.07
6.12	18.84	22.509	1.08
6.127	18.015	22.078	1.052
6.134	17.572	22.42	1.057
6.142	17.274	22.177	1.072
6.149	17.953	22.164	1.086
6.156	16.331	22.26	1.073
6.163	15.784	21.704	1.062
6.17	15.133	21.691	1.045
6.177	15.133	22.145	1.074
6.185	14.379	21.699	1.05
6.192	14.683	22.54	1.089
6.199	14.012	22.487	1.109
6.206	13.503	22.481	1.062
6.213	13.601	23.305	1.075
6.22	13.189	22.955	1.056
6.227	13.577	23.662	1.073
6.235	13.491	23.248	1.079
6.242	13.044	23.397	1.08
6.249	12.938	23.758	1.071
6.256	12.926	23.644	1.079
6.263	12.809	23.352	1.063
6.27	13.411	23.412	1.099
6.277	12.603	22.521	1.033
6.285	13.56	23.839	1.089
6.292	13.116	23.169	1.113
6.299	13.329	23.261	1.087
6.306	13.792	23.415	1.068
6.313	13.067	22.565	1.043
6.32	13.211	22.376	1.06
6.328	13.78	22.83	1.089
6.335	13.39	22.14	1.09
6.342	13.794	22.099	1.085
6.349	13.688	22.002	1.054
6.356	13.622	21.493	1.016
6.363	13.546	21.66	1.046
6.37	13.671	22.028	1.038
6.378	14.02	21.932	1.095
6.385	14.239	21.567	1.053
6.392	14.261	22.138	1.07
6.399	13.226	20.374	1.026
6.406	13.837	20.983	1.008
6.413	15.352	21.034	1.035
6.42	13.873	21.21	1.016
6.428	14.32	21.024	1.034
6.435	14.085	20.924	1.056
6.442	14.506	22.586	1.036
6.449	14.455	20.784	1.033
6.456	14.597	22.702	1.03
6.463	14.856	21.025	1.028
6.471	14.401	20.789	1.026
6.478	14.654	21.108	1.055
6.485	15.198	21.237	1.01
6.492	14.611	20.752	1.013
6.499	15.505	21.719	1.068
6.506	14.913	20.514	1.02
6.513	15.684	20.938	1.026
6.521	15.345	21.426	1.075
6.528	13.888	19.697	0.967
6.535	15.703	21.039	1.06
6.542	14.878	22.408	1.05
6.549	15.274	20.976	1.061
6.556	14.139	18.982	0.97
6.563	15.274	21.089	1.061
6.571	15.549	20.725	1.068
6.578	15.514	20.028	1.033
6.585	15.72	19.81	1.015
6.592	15.086	20.937	1.065
6.599	15.015	20.433	1.032
6.606	15.232	21.014	1.074
6.613	15.184	20.901	1.087
6.621	16.031	23.465	1.111
6.628	15.028	20.959	1.06
6.635	14.964	21.195	1.132
6.642	14.9	20.519	1.068
6.649	15.063	21.936	1.12
6.656	14.714	20.695	1.051
6.664	15.106	21.049	1.088
6.671	17.054	21.436	1.105
6.678	14.817	21.547	1.109
6.685	15.417	21.56	1.11
6.692	15.525	22.48	1.096
6.699	14.275	20.976	1.155
6.706	14.026	20.557	1.053
6.714	15.488	21.307	1.076
6.721	14.928	23.204	1.127
6.728	16.227	22.081	1.092
6.735	14.943	21.264	1.061
6.742	14.361	21.625	1.096
6.749	15.344	22.527	1.073
6.756	12.2	17.61	0.928
6.764	15.542	22.321	1.115
6.771	13.918	20.096	1.097
6.778	14.209	21.882	1.046
6.785	15.437	23.457	1.145
6.792	14.579	22.166	1.096
6.799	14.455	20.892	1.049
6.807	14.837	21.955	1.044
6.814	15.012	24.174	1.253
6.821	15.773	21.228	1.094
6.828	16.263	22.11	1.13
6.835	15.492	22.342	1.275
6.842	14.781	20.783	1.073
6.849	15	20.063	1.045
6.857	15.447	21.956	1.109
6.864	14.974	20.435	1.035
6.871	16.154	22.223	1.151
6.878	15.338	21.007	1.07
6.885	16.073	20.975	1.047
6.892	14.747	20.474	1.095
6.899	15.421	22.28	1.118
6.907	15.768	22.554	1.13
6.914	15.321	21.157	1.094
6.921	15.666	22.678	1.114
6.928	15.844	21.588	1.065
6.935	17.052	22.489	1.131
6.942	16.757	21.939	1.061
6.95	17.036	21.837	1.092
6.957	16.42	21.613	1.054
6.964	17.433	21.121	1.049
6.971	16.948	21.723	1.076
6.978	17.237	21.028	1.032
6.985	17.309	20.684	1.083
6.992	16.949	19.651	1.008
7	16.333	19.648	0.963
7.007	17.103	20.641	1.001
7.014	17.606	20.372	1.062
7.021	18.342	20.238	1.019
7.028	18.347	20.788	1.03
7.035	18.133	19.701	0.968
7.042	19.172	19.955	0.997
7.05	17.98	19.475	1.032
7.057	18.992	20.169	1.023
7.064	19.115	19.464	0.991
7.071	21.583	19.833	1.035
7.078	18.499	18.99	0.986
7.085	18.879	19.194	0.99
7.093	19.17	18.733	0.999
7.1	18.188	19.622	1.044
7.107	19.133	19.46	1.023
7.114	18.587	19.063	1.02
7.121	17.184	17.563	0.953
7.128	18.034	18.289	0.991
7.135	18.439	18.584	1.035
7.143	18.502	19.578	1.05
7.15	17.504	18.536	0.99
7.157	17.133	18.309	1.017
7.164	17.392	18.52	1.034
7.171	17.547	18.932	1.022
7.178	16.955	18.453	1.013
7.185	16.979	19.163	1.071
7.193	16.203	19.249	1.036
7.2	15.532	19.45	1.048
7.207	15.545	17.643	0.97
7.214	16.72	19.154	1.021
7.221	16.356	19.304	1.034
7.228	16.808	19.919	1.029
7.236	15.824	18.698	1.055
7.243	16.573	19.797	1.063
7.25	15.928	18.791	1.031
7.257	17.151	20.363	1.017
7.264	16.872	19.612	1.018
7.271	15.515	18.748	1.017
7.278	15.367	18.593	1.014
7.286	15.391	18.907	1.009
7.293	15.006	17.991	0.982
7.3	15.978	18.88	1.037
7.307	15.156	18.941	1.027
7.314	15.956	18.69	1.004
7.321	15.988	19.822	1.035
7.328	16.801	19.588	1.058
7.336	16.349	19.223	1.073
7.343	16.087	19.21	1.056
7.35	16.372	19.217	1.059
7.357	15.485	19.359	1.065
7.364	15.442	18.523	1.023
7.371	15.544	19.984	1.054
7.379	14.429	18.585	1.08
7.386	15.627	19.415	1.042
7.393	16.257	19.666	1.05
7.4	14.875	19.758	1.015
7.407	15.684	19.876	1.034
7.414	15.428	19.314	1.138
7.421	14.762	19.016	1.039
7.429	15.629	19.408	1.044
7.436	15.084	18.815	0.981
7.443	15.141	19.24	1.045
7.45	16.039	20.302	1.049
7.457	15.373	19.205	1.028
7.464	15.251	21.72	1.032
7.471	15.861	20.006	1.111
7.479	15.518	20.329	1.067
7.486	15.82	19.637	1.036
7.493	15.662	20.547	1.066
7.5	15.775	19.756	1.072
7.507	15.278	19.443	1.064
7.514	15.555	19.811	1.035
7.522	15.331	19.339	1.03
7.529	15.364	19.22	1.07
7.536	15.663	19.667	1.037
7.543	15.575	19.507	1.011
7.55	14.894	19.11	1.011
7.557	15.259	19.265	1.059
7.564	14.806	18.912	1.001
7.572	15.474	20.142	1.064
7.579	15.53	19.766	1.066
7.586	15.814	20.305	1.088
7.593	15.801	19.89	1.066
7.6	14.783	19.098	0.998
7.607	15.413	20.121	1.079
7.614	15.726	19.661	1.051
7.622	15.913	19.918	1.059
7.629	16.309	20.011	1.044
7.636	17.036	20.009	1.117
7.643	15.911	19.921	1.061
7.65	15.966	19.725	1.035
7.657	16.876	20.243	1.083
7.665	17.002	20.289	1.088
7.672	17.331	20.553	1.091
7.679	17.023	20.421	1.112
7.686	16.791	19.885	1.054
7.693	17.514	20.617	1.1
7.7	17.458	20.077	1.066
7.707	17.54	20.991	1.045
7.715	18.469	20.345	1.098
7.722	17.216	20.203	1.052
7.729	17.835	20.293	1.096
7.736	16.812	19.39	1.073
7.743	17.412	19.901	1.046
7.75	17.128	19.516	1.025
7.757	16.971	19.744	1.011
7.765	16.605	19.898	1.016
7.772	17.327	19.862	1.014
7.779	17.463	20.032	1.096
7.786	16.03	18.306	0.954
7.793	17.317	20.157	1.051
7.8	17.563	20.081	1.057
7.808	17.717	19.864	1.044
7.815	17.9	20.334	1.05
7.822	18.274	19.837	1.052
7.829	17.6	19.601	1.137
7.836	16.953	19.356	1.018
7.843	17.352	19.181	1.069
7.85	18.036	19.868	1.02
7.858	17.065	19.177	1.005
7.865	16.866	19.381	1.063
7.872	17.346	19.741	1.041
7.879	16.418	18.383	0.966
7.886	17.756	19.188	1.059
7.893	18.151	19.474	1.049
7.9	17.114	18.598	1.022
7.908	16.352	18.309	0.996
7.915	17.277	18.971	1.056
7.922	17.317	19.927	1.037
7.929	18	19.417	1.066
7.936	17.755	18.818	1.049
7.943	18.614	18.973	1.043
7.951	18.214	19.604	1.086
7.958	18.404	18.925	1.081
7.965	17.509	18.319	1.017
7.972	18.059	18.822	1.049
7.979	19.352	18.784	1.069
7.986	18.842	18.358	1.031
7.993	19.158	18.724	1.068
8.001	19.233	18.561	1.075
8.008	20.048	19.099	1.06
8.015	20.066	19.761	1.06
8.022	20.03	19.03	1.064
8.029	20.193	18.688	1.035
8.036	20.543	18.839	1.069
8.043	20.634	18.616	1.071
8.051	21.4	18.632	1.058
8.058	20.142	18.054	1.052
8.065	21.211	18.198	1.085
8.072	20.492	18.642	1.1
8.079	20.51	18.726	1.08
8.086	20.227	19.207	1.049
8.093	20.371	19.244	1.068
8.101	19.85	19.517	1.072
8.108	21.043	19.862	1.083
8.115	20.459	19.118	1.065
8.122	20.196	19.055	1.04
8.129	20.121	19.072	1.072
8.136	20.215	18.484	1.058
8.144	20.299	18.578	1.073
8.151	20.373	18.446	1.083
8.158	17.381	16.418	0.904
8.165	21.086	18.908	1.096
8.172	21.62	18.848	1.134
8.179	19.877	18.402	1.062
8.186	19.562	18.253	1.021
8.194	20.126	19.012	1.057
8.201	19.597	18.097	1.032
8.208	19.537	18.774	1.032
8.215	19.067	18.727	0.99
8.222	19.058	18.109	1.026
8.229	17.988	17.058	0.927
8.236	19.821	19.762	1.122
8.244	18.996	18.552	1.029
8.251	19.4	18.92	1.056
8.258	19.33	18.361	1.038
8.265	20.233	19.279	1.066
8.272	20.099	19.422	1.14
8.279	19.118	18.382	1.036
8.287	18.866	19.305	1.08
8.294	18.307	17.894	1.013
8.301	18.843	18.381	1.041
8.308	18.059	17.981	1.036
8.315	20.115	19.25	1.123
8.322	19.301	18.316	1.104
8.329	18.532	18.969	1.057
8.337	18.532	18.451	1.041
8.344	18.406	18.942	1.067
8.351	18.775	19.072	1.066
8.358	19.499	18.658	1.084
8.365	18.661	18.559	1.076
8.372	18.89	18.374	1.065
8.379	18.572	21.148	1.064
8.387	18.945	18.941	1.063
8.394	19.338	19.749	1.133
8.401	19.479	19.886	1.071
8.408	20.204	18.751	1.071
8.415	19.313	19.063	1.065
8.422	19.63	19.883	1.085
8.43	18.275	18.467	1.059
8.437	19.552	19.746	1.081
8.444	21.81	18.833	1.063
8.451	19.077	19.15	1.05
8.458	17.894	18.587	1.013
8.465	18.866	18.869	1.061
8.472	19.715	19.329	1.111
8.48	20.465	19.089	1.066
8.487	21.997	19.309	1.135
8.494	20.515	19.69	1.117
8.501	20.067	19.168	1.102
8.508	20.53	19.792	1.161
8.515	20.149	18.225	1.055
8.522	19.832	18.299	1.076
8.53	21.802	19.418	1.11
8.537	20.595	19.279	1.055
8.544	21.017	18.189	1.006
8.551	21.585	20.569	1.091
8.558	20.552	18.411	1.046
8.565	21.136	19.654	1.07
8.573	22.634	19.533	1.147
8.58	22.839	22.069	1.076
8.587	21.127	18.911	1.13
8.594	18.485	15.771	0.967
8.601	23.271	23.295	1.085
8.608	22.597	20.358	1.054
8.615	23.651	20.824	1.089
8.623	29	20.846	1.058
8.63	24.716	22.546	1.162
8.637	24.754	21.189	1.078
8.644	23.888	21.497	1.116
8.651	23.224	20.338	1.058
8.658	22.928	20.502	1.218
8.665	23.773	21.569	1.093
8.673	23.419	19.931	1.113
8.68	23.876	19.23	1.067
8.687	23.785	20.096	1.064
8.694	22.006	17.392	0.962
8.701	24.141	20.055	1.064
8.708	24.384	19.794	1.138
8.716	22.659	18.835	1.024
8.723	24.205	18.94	1.087
8.73	26.008	19.715	1.074
8.737	26.09	19.346	1.166
8.744	23.332	17.867	1.011
8.751	26.907	18.992	1.084
8.758	28.213	20.267	1.127
8.766	27.132	19.137	1.046
8.773	27.208	19.189	1.087
8.78	25.358	19.486	1.073
8.787	26.989	18.802	1.059
8.794	25.638	18.375	1.039
8.801	26.786	19.764	1.09
8.808	25.426	19.211	1.078
8.816	22.607	16.862	0.962
8.823	25.012	19.149	1.092
8.83	24.105	18.722	1.02
8.837	23.85	18.237	1.043
8.844	25.823	19.292	1.115
8.851	24.114	18.783	1.06
8.859	24.843	18.867	1.104
8.866	23.034	17.267	1.006
8.873	26.553	19.496	1.178
8.88	25.338	18.687	1.103
8.887	24.856	18.708	1.078
8.894	23.981	20.782	1.128
8.901	23.237	18.914	1.057
8.909	23.353	18.489	1.105
8.916	22.427	18.162	1.039
8.923	24.679	22.048	1.081
8.93	23.035	19.131	1.1
8.937	24.052	19.133	1.083
8.944	21.413	18.788	1.034
8.951	19.982	17.198	0.978
8.959	21.79	18.581	1.102
8.966	21.404	18.439	1.014
8.973	23.574	19.164	1.1
8.98	22.332	19.045	1.072
8.987	21.868	19.419	1.149
8.994	21.207	19.393	1.02
9.002	21.54	20.083	1.07
9.009	22.297	19.402	1.156
9.016	23.34	18.693	1.025
9.023	23.546	19.266	1.083
9.03	22.901	20.567	1.068
9.037	22.253	19.663	1.099
9.044	24.084	19.389	1.064
9.052	24.093	20.168	1.062
9.059	22.732	19.633	1.055
9.066	22.765	19.279	1.049
9.073	24.176	21.055	1.071
9.08	22.269	19.547	1.053
9.087	23.538	21.555	1.094
9.094	22.253	17.767	1.034
9.102	22.774	18.601	1.053
9.109	23.989	19.938	1.028
9.116	23.629	20.66	1.184
9.123	22.145	18.454	1.039
9.13	23.665	19.727	1.108
9.137	22.797	19.061	1.109
9.145	25.632	20.377	1.184
9.152	23.729	20.141	1.189
9.159	22.472	19.853	1.12
9.166	22.705	19.304	1.058
9.173	24.75	19.786	1.128
9.18	23.497	19.537	1.095
9.187	22.903	20.167	1.107
9.195	23.808	22.329	1.087
9.202	21.762	20.725	1.2
9.209	23.508	20.383	1.109
9.216	21.709	20.245	1.106
9.223	20.758	20.729	1.114
9.23	22.432	20.106	1.273
9.237	20.554	19.859	1.033
9.245	20.257	19.684	1.092
9.252	20.385	20.92	1.095
9.259	21.356	21.289	1.143
9.266	22.174	20.439	1.142
9.273	19.377	19.341	1.054
9.28	18.989	22.63	1.037
9.288	19.777	21.797	1.117
9.295	20.547	21.261	1.175
9.302	17.399	19.927	1.023
9.309	18.269	19.332	1.067
9.316	18.093	20.959	1.061
9.323	19.042	20.548	1.073
9.33	18	20.501	1.096
9.338	17.567	20.878	1.178
9.345	18.478	20.918	1.077
9.352	19.192	21.977	1.147
9.359	18.236	23.008	1.106
9.366	18.802	20.501	1.106
9.373	17.315	21.698	1.02
9.38	18.39	20.284	1.106
9.388	17.341	19.813	1.057
9.395	20.882	21.63	1.155
9.402	17.383	19.869	1.057
9.409	17.565	19.768	1.01
9.416	17.382	19.654	1.059
9.423	20.803	20.828	1.289
9.43	18.749	18.792	1.077
9.438	19.142	21.318	1.135
9.445	18.468	19.399	1.061
9.452	19.326	19.504	1.015
9.459	18.669	18.669	1.019
9.466	19.051	22.739	1.052
9.473	20.116	20.556	1.102
9.481	18.715	20.898	1.178
9.488	18.94	20.303	1.052
9.495	20.134	21.669	1.187
9.502	20.656	21.521	1.224
9.509	17.847	20.427	1.121
9.516	19.551	21.175	1.14
9.523	20.872	22.714	1.183
9.531	19.778	22.7	1.175
9.538	22.334	21.528	1.116
9.545	21.108	22.393	1.152
9.552	19.009	21.687	1.258
9.559	20.193	23.88	1.255
9.566	17.027	20.663	1.035
9.573	19.295	23.719	1.168
9.581	19.202	21.677	1.15
9.588	18.976	21.475	1.089
9.595	19.449	22.054	1.115
9.602	18.06	21.216	1.099
9.609	19.982	21.767	1.132
9.616	17.111	21.104	1.102
9.624	21.19	23.009	1.312
9.631	18.14	22.231	1.051
9.638	18.78	22.017	1.158
9.645	17.345	20.745	1.088
9.652	17.478	22.995	1.049
9.659	18.846	22.313	1.111
9.666	16.302	20.392	1.066
9.674	17.61	21.529	1.13
9.681	17.119	21.541	1.061
9.688	17.32	21.339	1.072
9.695	17.358	21.733	1.161
9.702	16.847	20.324	1.089
9.709	16.875	20.796	1.081
9.716	16.46	21.528	1.103
9.724	16.472	21.42	1.052
9.731	16.918	21.617	1.069
9.738	16.306	21.343	1.179
9.745	15.93	20.877	1.066
9.752	16.001	21.642	1.071
9.759	15.621	20.597	1.09
9.767	15.406	22.2	1.056
9.774	15.08	19.79	1.046
9.781	15.87	20.771	1.072
9.788	15.519	20.086	1.057
9.795	15.58	20.67	1.049
9.802	15.661	21.374	1.053
9.809	15.024	19.435	1.018
9.817	15.522	19.181	0.996
9.824	16.041	20.413	1.103
9.831	15.345	19.706	1.03
9.838	15.443	19.244	1.023
9.845	14.976	18.326	0.952
9.852	15.602	17.976	0.969
9.859	15.239	18.862	0.984
9.867	15.649	17.766	0.957
9.874	17.397	19.967	1.033
9.881	17.443	19.127	1.116
9.888	16.656	18.781	1.045
9.895	15.997	17.607	0.983
9.902	16.611	18.197	0.993
9.91	16.54	19.602	1.033
9.917	17.054	18.459	1.027
9.924	15.522	18.434	0.958
9.931	15.852	17.768	0.989
9.938	17.245	18.184	1.039
9.945	17.954	19.393	1.032
9.952	16.971	18.602	1.006
9.96	16.242	18.182	1.02
9.967	16.071	17.763	1.055
9.974	15.334	16.663	0.973
9.981	16.143	17.62	1.095
9.988	15.741	17.78	1.004
9.995	16.769	17.976	1.035
10.002	16.617	18.465	1.032
10.01	14.729	16.621	0.937
10.017	15.845	17.313	1.014
10.024	15.976	18.543	1.029
10.031	15.499	17.92	0.984
10.038	16.222	17.308	0.984
10.045	15.839	17.611	1.03
10.053	15.105	16.618	0.97
10.06	15.455	17.48	1.082
10.067	16.619	17.928	1.062
10.074	16.718	18.005	1.045
10.081	15.692	18.45	1.025
10.088	16.72	18.196	1.037
10.095	16.198	18.815	1.01
10.103	16.17	18.576	1.03
10.11	15.96	19.461	1.047
10.117	16.158	18.602	1.231
10.124	15.438	17.975	1.01
10.131	16.516	18.89	1.16
10.138	15.733	18.518	1
10.145	16.168	19.417	1.046
10.153	15.969	19.636	1.09
10.16	15.811	18.515	1.051
10.167	15.895	18.981	1.032
10.174	15.974	19.44	1.087
10.181	15.181	19.197	1.013
10.188	15.347	18.584	1.016
10.196	15.107	18.791	1.167
10.203	17.932	19.006	1.085
10.21	16.063	18.18	0.997
10.217	14.189	18.425	0.995
10.224	14.142	19.835	1.087
10.231	14.517	19.069	1.027
10.238	13.767	18.227	0.967
10.246	13.869	18.954	0.988
10.253	14.312	19.938	1.069
10.26	13.953	19.985	1.002
10.267	13.484	19.337	1.072
10.274	13.731	20.061	1.18
10.281	12.724	19.148	0.952
10.288	12.876	19.617	1.008
10.296	13.16	18.994	1
10.303	13.388	19.712	1.04
10.31	13.506	20.871	1.035
10.317	13.163	20.116	1.04
10.324	13.661	20.541	0.998
10.331	13.541	20.306	1.056
10.339	13.235	20.129	1.048
10.346	12.736	20.511	1.074
10.353	13.038	20.18	1.01
10.36	12.716	20.644	0.975
10.367	12.548	19.388	0.981
10.374	14.193	21.456	1.076
10.381	12.975	21.603	1.119
10.389	13.238	22.918	1.007
10.396	13.76	21.223	1.005
10.403	12.97	21.014	1.01
10.41	15.148	21.116	1.04
10.417	12.282	20.074	0.923
10.424	12.922	20.93	1.012
10.431	13.304	21.496	1.075
10.439	12.83	20.463	0.951
10.446	13.292	19.619	0.936
10.453	11.673	19.046	0.896
10.46	12.787	21.743	0.972
10.467	13.88	20.654	0.986
10.474	11.919	20.657	0.987
10.482	12.289	20.879	1.008
10.489	12.739	22.451	1.1
10.496	13.003	21.713	1.026
10.503	12.783	21.797	1.009
10.51	12.356	21.977	1.028
10.517	11.524	19.57	0.9
10.524	12.075	21.891	1.006
10.532	12.131	21.392	0.983
10.539	12.416	24.258	1.047
10.546	11.233	19.408	0.973
10.553	11.953	21.069	1.057
10.56	11.87	20.793	1.015
10.567	12.086	20.886	0.997
10.574	12.231	21.629	1.039
10.582	11.595	20.546	1.008
10.589	10.523	19.366	0.905
10.596	11.94	20.414	0.991
10.603	11.329	19.441	0.974
10.61	11.863	20.476	1.054
10.617	12.669	21.273	1.002
10.625	11.784	20.196	1.058
10.632	13.336	20.174	0.941
10.639	11.966	20.223	1.141
10.646	11.899	20.441	1.128
10.653	10.775	20.257	0.938
10.66	11.643	20.56	1.055
10.667	11.604	19.407	1.07
10.675	11.268	20.997	1.01
10.682	11.541	19.536	1.015
10.689	12.086	20.005	1.021
10.696	12.655	20.929	1.034
10.703	12.226	21.891	1.056
10.71	11.596	21.117	1.018
10.717	11.909	20.938	1.058
10.725	11.956	20.071	1.005
10.732	12.015	21.216	1.037
10.739	12.385	21.422	1.065
10.746	10.967	18.361	0.998
10.753	14.144	21.052	1.066
10.76	12.083	21.037	1.06
10.767	12.019	19.325	1.01
10.775	10.82	19.269	0.944
10.782	12.681	20.728	1.054
10.789	11.644	20.627	1.019
10.796	11.898	21.147	1.049
10.803	12.278	20.274	1.009
10.81	12.12	20.354	0.984
10.818	11.826	20.415	1.021
10.825	11.573	20.593	1.015
10.832	11.416	20.703	1.05
10.839	12.285	21.248	1.046
10.846	11.278	18.957	0.99
10.853	12.476	20.617	1.091
10.86	12.074	23.847	1.082
10.868	11.356	18.725	0.934
10.875	12.016	21.032	1.059
10.882	12.039	21.051	1.03
10.889	11.985	19.762	0.986
10.896	12.697	22.421	1.195
10.903	11.999	23.362	1.02
10.91	11.923	19.855	1.014
10.918	13.492	21.572	1.078
10.925	12.935	20.49	1.168
10.932	12.864	19.874	1.002
10.939	13.288	21.146	1.051
10.946	14.263	21.028	1.13
10.953	15.029	21.087	1.078
10.961	14.696	22.099	1.06
10.968	13.737	19.85	0.995
10.975	14.802	20.59	1.079
10.982	14.235	21.486	1.112
10.989	13.525	19.59	1.061
10.996	12.795	20.859	1.1
11.003	13.476	19.706	1.041
11.011	15.111	21.979	1.114
11.018	14.353	24.664	1.139
11.025	14.184	19.617	1.001
11.032	13	19.81	1.049
11.039	14.644	21.357	1.132
11.046	13.818	20.639	1.208
11.053	15	22.613	1.099
11.061	14.498	21.438	1.095
11.068	13.994	21.121	1.059
11.075	14.753	22.512	1.161
11.082	14.15	20.781	1.116
11.089	13.545	21.975	1.198
11.096	14.887	22.504	1.176
11.104	13.803	21.097	1.121
11.111	12.956	20.214	1.065
11.118	16.259	21.268	1.174
11.125	12.665	20.578	1.124
11.132	14.53	22.021	1.162
11.139	14.387	22.065	1.14
11.146	13.324	20.271	1.073
11.154	13.769	25.174	1.118
11.161	13.987	21.764	1.15
11.168	13.682	21.527	1.1
11.175	14.384	21.425	1.086
11.182	14.871	21.893	1.125
11.189	14.248	21.391	1.199
11.196	14.25	19.593	1.107
11.204	15.338	21.325	1.058
11.211	14.64	20.959	1.104
11.218	13.86	22.098	1.228
11.225	15.23	21.704	1.152
11.232	15.769	21.908	1.285
11.239	14.685	20.708	1.16
11.247	13.994	19.718	1.025
11.254	14.794	20.098	1.075
11.261	15.859	21.17	1.287
11.268	15.076	20.645	1.11
11.275	14.136	20.585	1.092
11.282	16.767	25.543	1.266
11.289	15.337	20.296	1.118
11.297	17.984	19.744	1.082
11.304	17.385	23.863	1.156
11.311	17.308	23.081	1.142
11.318	16.444	20.44	1.109
11.325	17.002	20.952	1.114
11.332	16.897	22.373	1.183
11.339	17.119	24.053	1.108
11.347	16.461	20.822	1.173
11.354	16.711	20.309	1.054
11.361	16.799	20.89	1.139
11.368	17.754	20.205	1.091
11.375	17.105	20.715	1.118
11.382	16.543	19.805	0.989
11.39	17.429	21.276	1.209
11.397	18.064	24.165	1.128
11.404	17.823	20.443	1.053
11.411	17.866	22.526	1.118
11.418	18.531	21.819	1.118
11.425	19.676	23.352	1.183
11.432	18.714	22.353	1.243
11.44	18.757	21.374	1.12
11.447	18.461	21.702	1.208
11.454	16.924	20.406	1.065
11.461	18.834	21.863	1.158
11.468	18.485	22.305	1.154
11.475	18.527	21.421	1.149
11.482	17.09	20.673	1.059
11.49	16.782	20.563	1.082
11.497	19.494	22.837	1.205
11.504	16.803	20.181	1.086
11.511	17.512	20.742	1.115
11.518	18.126	23.978	1.153
11.525	17.338	20.153	1.054
11.533	17.72	21.176	1.086
11.54	17.612	23.031	1.169
11.547	17.728	22.043	1.122
11.554	16.175	19.337	1.071
11.561	18.664	23.165	1.148
11.568	18.615	21.434	1.252
11.575	17.551	21.778	1.108
11.583	16.777	20.372	1.085
11.59	18.667	20.947	1.187
11.597	16.025	20.195	1.05
11.604	17.946	21.623	1.158
11.611	18.007	22.119	1.23
11.618	17.135	22.031	1.243
11.625	15.276	19.63	1.053
11.633	17.473	21.323	1.109
11.64	17.114	22.484	1.122
11.647	17.182	20.728	1.127
11.654	16.693	21.748	1.125
11.661	16.854	20.452	1.113
11.668	19.485	20.996	1.102
11.676	16.67	23.547	1.15
11.683	15.761	20.119	1.064
11.69	16.661	22.778	1.14
11.697	14.768	19.242	1.009
11.704	16.155	22.469	1.206
11.711	16.416	20.914	1.122
11.718	15.592	20.178	1.069
11.726	15.779	22.893	1.136
11.733	17.345	20.124	1.057
11.74	16.665	20.244	1.05
11.747	15.16	20.44	1.053
11.754	15.295	19.962	1.052
11.761	17.72	20.913	1.225
11.768	15.464	19.665	1.021
11.776	14.999	20.988	1.036
11.783	13.829	18.835	1.036
11.79	15.782	20.027	1.071
11.797	16.787	20.03	1.042
11.804	16.303	20.833	1.1
11.811	14.834	18.331	0.978
11.818	15.493	20.138	1.035
11.826	14.409	18.222	0.98
11.833	14.698	18.325	0.999
11.84	15.671	20.565	1.091
11.847	14.736	18.917	1.06
11.854	15.422	18.814	1.014
11.861	16.706	20.098	1.076
11.869	16.571	21.09	1.046
11.876	16.094	19.539	1.01
11.883	16.63	20.17	1.08
11.89	16.819	19.91	1.091
11.897	17.227	20.134	1.254
11.904	17.137	21.081	1.057
11.911	17.234	21.64	1.016
11.919	16.886	21.519	1.065
11.926	16.661	19.673	1.045
11.933	16.584	19.247	1.001
11.94	16.795	19.504	1.033
11.947	17.522	19.225	0.993
11.954	17.082	20.338	1.021
11.962	16.933	19.188	1.027
11.969	16.671	19.189	1.014
11.976	16.678	19.22	0.995
11.983	17.85	21.829	1.146
11.99	17.893	19.426	1.103
11.997	17.844	19.313	1.04
12.004	17.742	19.242	1.006
12.012	17.531	19.523	1.026
12.019	17.092	19.605	0.992
12.026	16.683	18.653	1.008
12.033	18.096	19.977	0.97
12.04	18.203	18.857	1.038
12.047	17.098	18.099	0.983
12.054	18.492	18.652	0.963
12.062	17.844	19.082	1.015
12.069	18.064	18.224	0.986
12.076	18.237	18.103	0.943
12.083	18.329	19.607	0.987
12.09	18.587	17.979	1.011
12.097	17.016	17.703	0.941
12.104	17.632	19.1	0.944
12.112	17.431	18.032	0.94
12.119	18.036	19.351	1.033
12.126	17.83	18.624	0.985
12.133	17.356	17.972	0.939
12.14	17.349	18.38	0.996
12.147	16.654	17.064	1.021
12.155	17.719	18.176	1.044
12.162	19.103	17.01	0.976
12.169	16.48	16.661	0.934
12.176	17.273	16.771	0.944
12.183	17.535	17.705	1.014
12.19	16.706	17.264	0.97
12.197	16.705	17.021	0.993
12.205	17.481	17.405	0.966
12.212	17.269	17.017	1.019
12.219	17.656	16.604	0.931
12.226	18.248	17.664	0.971
12.233	16.805	18.383	0.988
12.24	17.589	18.615	0.98
12.247	17.548	16.47	0.924
12.255	19.85	18.209	1.003
12.262	17.798	17.283	1.072
12.269	17.263	17.47	0.963
12.276	16.983	20.269	1.006
12.283	16.862	17.024	0.994
12.29	16.687	16.923	0.952
12.298	17.036	18.077	0.956
12.305	17.174	17.641	0.989
12.312	16.619	17.214	0.958
12.319	15.787	17.009	1.01
12.326	17.419	17.561	0.935
12.333	16.177	17.609	0.994
12.34	16.483	17.511	1.017
12.348	16.789	19.442	0.945
12.355	15.413	17.101	0.945
12.362	15.747	18.184	0.956
12.369	15.871	18.469	0.968
12.376	15.607	16.231	0.942
12.383	17.12	16.836	0.945
12.39	15.889	17.109	0.985
12.398	16.828	17.339	0.959
12.405	16.953	17.471	1.008
12.412	15.342	16.823	0.932
12.419	16.37	17.72	1.033
12.426	16.873	17.067	0.935
12.433	16.132	18.181	0.957
12.441	16.779	18.141	0.987
12.448	15.431	16.147	0.918
12.455	17.447	20.133	1.009
12.462	20.276	17.966	0.963
12.469	17.102	17.573	1.029
12.476	16.602	17.752	0.97
12.483	15.739	17.027	0.996
12.491	16.608	18.486	0.977
12.498	15.776	17.295	0.923
12.505	15.804	17.057	1.132
12.512	17.752	19.357	1.021
12.519	17.17	17.962	0.962
12.526	17.138	16.731	0.958
12.533	16.08	16.957	0.943
12.541	16.047	17.4	0.937
12.548	15.887	17.362	1.024
12.555	16.136	17.829	0.988
12.562	16.199	19.375	1.004
12.569	17.008	18.288	1.003
12.576	15.117	17.884	0.931
12.584	16.252	17.8	0.99
12.591	16.912	18.558	1.01
12.598	16.022	18.492	1.063
12.605	15.283	17.64	1.004
12.612	15.597	18.461	0.953
12.619	16.755	18.238	0.972
12.626	15.686	18.915	1.073
12.634	15.716	17.928	1.033
12.641	15.799	18.404	0.996
12.648	15.701	19.21	1.026
12.655	15.293	18.539	1.003
12.662	14.629	18.234	0.971
12.669	15.09	17.147	0.929
12.676	16.263	19.126	0.992
12.684	15.212	17.587	0.95
12.691	15.452	20.179	1.01
12.698	16.457	19.634	0.986
12.705	15.151	18.598	1.009
12.712	15.158	18.42	1.005
12.719	14.689	19.061	0.997
12.727	14.607	19.55	0.997
12.734	14.586	19.236	1.012
12.741	14.203	20.752	1.04
12.748	13.905	18.248	0.979
12.755	13.882	18.807	1.025
12.762	14.428	18.876	1.016
12.769	14.032	18.854	1.046
12.777	13.033	18.882	0.965
12.784	14.848	18.908	1.009
12.791	12.558	17.047	0.893
12.798	14.022	17.763	0.984
12.805	13.161	17.585	0.949
12.812	14.208	19.187	0.988
12.819	13.954	20.467	0.994
12.827	14.488	19.152	0.981
12.834	13.956	18.804	0.987
12.841	14.377	18.978	1.082
12.848	13.385	18.793	1.011
12.855	13.811	19.184	1.001
12.862	14.923	20.867	0.999
12.87	14.114	19.495	1.089
12.877	13.179	17.543	0.916
12.884	13.629	18.766	0.993
12.891	12.936	18.839	0.898
12.898	13.803	18.436	0.938
12.905	14.571	19.61	0.991
12.912	14.012	18.96	0.965
12.92	13.801	18.281	0.961
12.927	14.088	18.786	0.934
12.934	14.233	18.982	0.929
12.941	15.049	19.442	0.973
12.948	14.655	19.236	0.939
12.955	14.401	19.375	0.954
12.962	14.917	18.474	0.962
12.97	15.217	18.185	0.97
12.977	14.733	19.149	0.964
12.984	14.581	18.966	1.027
12.991	15.348	19.646	0.957
12.998	14.574	18.212	0.969
13.005	13.637	17.821	0.901
13.013	14.034	19.031	0.919
13.02	14.337	18.593	0.895
13.027	13.353	18.342	0.892
13.034	14.538	18.374	0.931
13.041	14.136	18.57	0.973
13.048	14.58	18.667	0.968
13.055	14.301	18.697	0.936
13.063	14.385	18.768	0.975
13.07	14.604	17.942	0.942
13.077	14.065	18.243	0.967
13.084	14.499	18.469	0.963
13.091	13.718	18.681	0.939
13.098	14.922	19.143	0.971
13.105	14.705	18.156	0.959
13.113	15.236	19.528	0.982
13.12	14.493	18.552	0.977
13.127	15.728	19.01	0.98
13.134	14.698	17.578	0.954
13.141	14.782	18.637	0.945
13.148	14.932	19.14	0.957
13.156	14.469	18.967	0.952
13.163	15.05	18.575	0.948
13.17	16.22	18.095	0.939
13.177	14.733	18.113	0.94
13.184	15.196	18.364	0.937
13.191	15.305	18.18	0.968
13.198	15.272	18.74	0.936
13.206	15.061	18.252	0.947
13.213	15.095	18.069	0.949
13.22	15.156	17.213	0.883
13.227	15.521	18.621	0.932
13.234	15.444	18.336	0.936
13.241	16.114	17.978	0.974
13.248	15.322	18.125	0.964
13.256	15.409	17.669	0.925
13.263	16.539	17.656	0.966
13.27	15.749	18.173	0.945
13.277	16.028	18.182	0.995
13.284	16.217	17.749	0.945
13.291	16.392	18.007	0.968
13.298	15.985	16.989	0.951
13.306	15.672	16.694	0.979
13.313	16.326	18.674	0.959
13.32	16.298	17.498	0.912
13.327	16.259	17.409	0.973
13.334	15.738	16.517	0.913
13.341	16.815	17.108	0.978
13.349	16.983	22.418	0.969
13.356	18.156	17.686	0.946
13.363	16.749	17.214	0.953
13.37	17.794	17.748	0.966
13.377	17.978	17.773	0.996
13.384	17.124	17.249	0.961
13.391	18.786	19.002	0.958
13.399	18.427	17.081	0.969
13.406	18.825	17.234	0.922
13.413	19.671	17.583	0.963
13.42	18.697	16.972	0.941
13.427	19.864	17.666	0.924
13.434	20.463	17.808	0.958
13.441	20.921	17.636	0.957
13.449	21.413	17.889	0.948
13.456	19.777	16.259	0.935
13.463	20.37	17.496	1
13.47	21.574	17.295	0.95
13.477	21.421	17.428	0.945
13.484	20.872	17.086	0.948
13.492	21.618	17.688	1.147
13.499	21.001	16.951	0.978
13.506	20.776	16.742	0.946
13.513	21.024	16.576	0.899
13.52	22.107	17.439	0.971
13.527	21.918	18.432	0.962
13.534	20.777	16.47	0.944
13.542	21.846	17.371	0.994
13.549	22.906	17.91	0.953
13.556	20.909	17.205	0.933
13.563	21.469	16.804	0.926
13.57	19.719	15.607	0.89
13.577	20.732	16.617	0.934
13.584	21.29	17.059	0.914
13.592	20.825	16.682	0.938
13.599	19.971	17.828	0.945
13.606	19.97	15.999	0.94
13.613	19.167	15.733	0.939
13.62	19.104	14.876	0.87
13.627	20.123	16.008	0.884
13.635	18.692	16.28	0.919
13.642	18.75	15.186	0.891
13.649	17.282	15.682	0.859
13.656	18.857	16.609	0.879
13.663	18.267	14.935	0.909
13.67	19.482	15.65	0.91
13.677	17.52	15.824	0.955
13.685	17.808	15.823	0.946
13.692	17.555	15.757	0.935
13.699	17.902	15.7	0.999
13.706	15.883	14.035	0.849
13.713	16.316	15.188	0.918
13.72	17.36	15.85	0.94
13.727	16.1	15.241	0.958
13.735	16.001	15.598	0.963
13.742	16.87	14.637	0.907
13.749	15.56	15.739	0.953
13.756	16.218	17.046	1.054
13.763	14.731	15.463	0.924
13.77	14.774	17.254	0.914
13.778	14.911	15.479	0.91
13.785	15.306	15.267	0.912
13.792	14.695	15.454	0.951
13.799	14.219	15.017	0.897
13.806	15.222	15.642	0.911
13.813	15.026	15.722	0.904
13.82	14.036	15.58	0.91
13.828	15.186	16.254	0.953
13.835	14.648	15.622	0.921
13.842	14.197	15.41	0.904
13.849	14.817	15.481	0.916
13.856	14.391	15.486	0.94
13.863	15.262	15.542	0.953
13.87	14.091	16.171	0.96
13.878	13.409	15.039	0.908
13.885	14.725	15.719	0.916
13.892	14.198	15.186	0.888
13.899	14.685	15.454	0.932
13.906	14.591	15.24	0.911
13.913	14.942	15.4	0.916
13.921	14.603	15.094	0.927
13.928	15.07	15.343	0.941
13.935	17.089	16.568	0.977
13.942	16.206	15.627	0.939
13.949	16.63	15.854	0.936
13.956	15.263	16.784	0.935
13.963	18.038	15.642	0.938
13.971	16.544	17.672	0.981
13.978	17.069	16.42	1.004
13.985	16.222	16.336	0.959
13.992	16.058	15.893	0.968
13.999	15.666	16.209	0.906
14.006	16.644	16.447	0.972
14.013	16.753	17.296	0.929
14.021	16.985	16.503	0.982
14.028	16.503	16.043	0.954
14.035	15.456	15.356	0.893
14.042	17.049	16.654	0.985
14.049	16.024	15.338	0.936
14.056	17.507	16.161	0.967
14.064	18.567	17.14	0.998
14.071	17.473	17.153	0.935
14.078	18.332	16.704	1.051
14.085	17.647	16.288	0.955
14.092	18.036	16.93	0.985
14.099	19.007	17.769	1.018
14.106	18.451	17.629	0.998
14.114	18.805	16.612	1.003
14.121	18.947	17.1	0.985
14.128	17.449	15.963	0.97
14.135	18.019	17.086	0.975
14.142	18.396	20.466	1.112
14.149	17.751	16.501	0.976
14.156	18.097	17.665	1.052
14.164	18.475	18.081	0.969
14.171	18.942	17.146	1.028
14.178	19.294	17.534	1.059
14.185	16.811	16.73	1.007
14.192	17.036	16.798	0.983
14.199	15.22	15.229	0.885
14.207	17.17	17.184	1.007
14.214	15.872	16.401	0.928
14.221	16.372	16.842	0.99
14.228	16.709	17.857	0.986
14.235	16.841	17.371	1.092
14.242	16.674	17.431	0.998
14.249	17.124	17.175	1.025
14.257	17.463	16.926	0.969
14.264	17.705	18.001	1.082
14.271	17.027	17.221	1.071
14.278	17.252	17.136	0.995
14.285	16.915	17.045	0.995
[truncated: 772 more rows]

## Sheet: 12R
Distance from commissure [mm]	Mg/Ca [mmol/mol]	Na/Ca [mmol/mol]	Sr/Ca [mmol/mol]
-7.82e-10	29.197	15.103	1.479
0.007	29.264	15.172	1.595
0.014	30.086	15.611	1.659
0.021	27.367	15.509	1.621
0.029	26.128	15.835	1.571
0.036	26.123	15.903	1.667
0.043	26.337	16.395	1.731
0.05	24.325	14.628	1.53
0.057	23.129	15.625	1.538
0.064	21.908	14.008	1.675
0.071	21.462	15.164	1.437
0.079	18.568	12.522	1.265
0.086	22.538	13.975	1.426
0.093	20.609	14.968	1.464
0.1	23.72	14.189	1.382
0.107	24.403	15.322	1.423
0.114	23.268	13.745	1.611
0.122	25.351	14.273	1.423
0.129	29.161	15.838	1.51
0.136	28.288	14.597	1.564
0.143	28.083	14.362	1.512
0.15	29.114	13.787	1.534
0.157	32.281	14.731	1.549
0.164	33.466	15.441	1.606
0.172	36.396	15.386	1.772
0.179	36.184	15.936	1.703
0.186	37.546	17.026	1.716
0.193	39.535	16.633	1.753
0.2	36.299	16.508	1.726
0.207	35.893	15.096	1.718
0.214	36.294	16.327	1.757
0.222	36.044	16.107	1.63
0.229	36.415	16.005	1.633
0.236	33.631	16.018	1.588
0.243	31.835	14.768	1.464
0.25	32.907	15.672	1.488
0.257	31.732	14.941	1.423
0.265	29.992	14.75	1.391
0.272	32.443	16.164	1.567
0.279	31.569	15.897	1.491
0.286	31.782	15.931	1.501
0.293	31.273	15.631	1.474
0.3	31.515	15.632	1.524
0.307	30.663	15.53	1.473
0.315	31.106	16.406	1.506
0.322	30.673	15.445	1.434
0.329	33.573	16.527	1.509
0.336	29.857	15.466	1.438
0.343	30.361	14.847	1.407
0.35	30.198	15.57	1.493
0.357	30.016	15.88	1.468
0.365	28.537	15.379	1.436
0.372	29.179	16.248	1.5
0.379	29.506	15.628	1.414
0.386	29.355	18.328	1.429
0.393	28.655	15.77	1.407
0.4	27.99	16.098	1.389
0.408	28.08	15.698	1.397
0.415	27.207	15.782	1.422
0.422	27.497	15.987	1.385
0.429	26.998	15.734	1.377
0.436	32.339	15.615	1.395
0.443	26.809	15.896	1.392
0.45	27.769	15.095	1.378
0.458	26.999	15.547	1.333
0.465	26.646	15.517	1.293
0.472	26.683	15.129	1.33
0.479	27.279	15.279	1.327
0.486	27.575	15.022	1.293
0.493	27.815	15.077	1.312
0.5	28.927	15.231	1.36
0.508	29.637	14.903	1.321
0.515	28.842	15.072	1.357
0.522	29.382	14.748	1.316
0.529	30.029	14.957	1.318
0.536	30.45	14.224	1.292
0.543	29.771	14.248	1.285
0.551	30.165	14.057	1.284
0.558	31.168	13.162	1.317
0.565	31.151	13.047	1.303
0.572	32.232	13.137	1.354
0.579	32.389	12.411	1.332
0.586	33.881	12.184	1.343
0.593	33.533	12.254	1.342
0.601	33.771	12.137	1.365
0.608	34.519	12.222	1.367
0.615	34.15	11.383	1.324
0.622	34.603	11.804	1.365
0.629	35.215	11.612	1.362
0.636	35.385	11.862	1.326
0.643	34.202	11.379	1.338
0.651	33.768	12.566	1.337
0.658	34.684	11.439	1.347
0.665	33.471	11.119	1.34
0.672	33.789	11.332	1.341
0.679	33.163	10.916	1.318
0.686	32.599	10.993	1.303
0.694	33.414	11.36	1.339
0.701	33.049	11.305	1.336
0.708	32.974	11.422	1.337
0.715	31.157	11.765	1.312
0.722	32.561	12.194	1.353
0.729	30.988	11.462	1.292
0.736	32.092	11.955	1.3
0.744	29.889	11.588	1.315
0.751	29.924	11.763	1.283
0.758	30.176	11.759	1.293
0.765	29.262	12.097	1.286
0.772	29.782	12.162	1.284
0.779	28.97	12.442	1.276
0.786	30.093	12.917	1.327
0.794	27.844	12.249	1.267
0.801	26.851	12.493	1.285
0.808	26.262	12.583	1.269
0.815	26.452	13.276	1.252
0.822	26.159	13.092	1.276
0.829	25.202	13.081	1.3
0.837	24.033	12.924	1.231
0.844	24.759	13.164	1.232
0.851	23.48	13.593	1.219
0.858	23.12	13.174	1.23
0.865	22.017	13.582	1.213
0.872	21.571	13.57	1.228
0.879	21.273	13.702	1.217
0.887	20.465	13.676	1.26
0.894	20.651	14.056	1.204
0.901	20.458	14.317	1.215
0.908	19.698	13.317	1.174
0.915	19.478	13.672	1.181
0.922	19.078	14.351	1.212
0.929	19.124	14.033	1.197
0.937	19.351	14.112	1.204
0.944	18.987	14.161	1.203
0.951	19.158	14.235	1.204
0.958	18.79	14.33	1.209
0.965	18.656	14.115	1.208
0.972	19.108	14.503	1.258
0.98	18.568	14.142	1.199
0.987	18.201	13.999	1.207
0.994	19.163	14.14	1.24
1.001	19.034	14.141	1.223
1.008	18.613	14.254	1.199
1.015	19.157	14.325	1.238
1.022	19.573	14.28	1.223
1.03	18.619	14.637	1.222
1.037	18.836	14.568	1.222
1.044	19.133	14.553	1.241
1.051	19.536	14.63	1.27
1.058	19.157	14.283	1.223
1.065	18.88	14.355	1.234
1.072	19.259	14.625	1.241
1.08	18.904	14.236	1.199
1.087	19.479	14.388	1.234
1.094	19.371	14.351	1.251
1.101	19.096	14.102	1.186
1.108	19.66	13.992	1.209
1.115	20.056	14.581	1.212
1.123	20.018	14.445	1.216
1.13	20.15	14.124	1.209
1.137	20.93	14.258	1.213
1.144	20.555	14.245	1.243
1.151	21.514	14.146	1.218
1.158	21.642	14.303	1.228
1.165	21.697	13.95	1.205
1.173	20.921	13.845	1.196
1.18	22.45	14.397	1.218
1.187	22.103	13.942	1.192
1.194	21.807	14.152	1.17
1.201	21.036	13.455	1.159
1.208	22.607	13.573	1.173
1.215	21.599	13.41	1.158
1.223	21.912	14.025	1.191
1.23	22.271	13.477	1.155
1.237	23.037	13.758	1.203
1.244	22.29	13.41	1.179
1.251	21.58	12.629	1.126
1.258	22.354	13.317	1.158
1.266	23.781	13.473	1.194
1.273	23.919	13.649	1.169
1.28	23.902	13.198	1.157
1.287	24.506	13.328	1.169
1.294	24.41	12.835	1.191
1.301	24.615	12.96	1.173
1.308	24.724	13.084	1.177
1.316	24.816	13.184	1.172
1.323	25.4	13.315	1.204
1.33	25.033	13.039	1.17
1.337	25.782	13.355	1.191
1.344	26.258	13.374	1.205
1.351	26.527	13.397	1.192
1.358	26.887	13.952	1.217
1.366	26.028	13.461	1.19
1.373	26.083	13.326	1.209
1.38	25.93	13.842	1.197
1.387	26.96	13.637	1.22
1.394	26.922	13.545	1.225
1.401	26.044	13.789	1.188
1.409	26.833	13.537	1.209
1.416	25.653	13.305	1.178
1.423	26.032	13.695	1.209
1.43	26.466	13.976	1.207
1.437	25.583	13.507	1.194
1.444	25.64	13.589	1.183
1.451	25.169	13.777	1.193
1.459	25.852	13.747	1.278
1.466	24.946	13.746	1.186
1.473	24.763	13.518	1.197
1.48	25.483	13.706	1.179
1.487	24.242	13.658	1.189
1.494	23.632	13.721	1.198
1.501	24.428	14.139	1.228
1.509	23.423	13.66	1.172
1.516	23.485	13.746	1.171
1.523	22.799	13.413	1.19
1.53	23.496	14.172	1.196
1.537	23.952	13.875	1.19
1.544	22.855	13.307	1.2
1.552	22.932	13.673	1.204
1.559	22.702	13.751	1.198
1.566	22.866	13.815	1.176
1.573	23.082	13.884	1.19
1.58	22.476	13.446	1.176
1.587	22.985	13.56	1.192
1.594	23.523	13.445	1.18
1.602	23.4	13.384	1.181
1.609	23.516	13.825	1.19
1.616	22.793	13.086	1.191
1.623	23.606	13.133	1.191
1.63	22.988	13.007	1.162
1.637	22.442	12.879	1.145
1.644	23.582	12.965	1.187
1.652	24.07	12.587	1.161
1.659	23.772	12.546	1.156
1.666	24.277	13.551	1.176
1.673	23.84	11.901	1.12
1.68	25.471	12.481	1.139
1.687	25.445	12.103	1.15
1.694	26.464	12.074	1.157
1.702	26.555	12.168	1.161
1.709	26.165	11.593	1.161
1.716	27.335	11.708	1.148
1.723	27.37	11.929	1.231
1.73	27.801	11.708	1.192
1.737	26.679	10.975	1.137
1.745	28.313	11.953	1.184
1.752	28.207	11.243	1.175
1.759	28.105	11.359	1.2
1.766	29.524	11.329	1.176
1.773	28.222	10.988	1.17
1.78	28.537	11.16	1.211
1.787	29.23	11.142	1.207
1.795	28.43	10.847	1.184
1.802	29.062	11.06	1.218
1.809	28.793	11.225	1.231
1.816	27.59	10.757	1.155
1.823	29.363	11.39	1.209
1.83	29.022	11.325	1.226
1.837	28.182	11.291	1.195
1.845	27.018	10.654	1.157
1.852	27.417	11.145	1.203
1.859	27.441	11.428	1.208
1.866	27.356	11.56	1.224
1.873	27.497	11.626	1.219
1.88	26.006	11.72	1.18
1.888	26.527	12.061	1.209
1.895	25.672	11.914	1.182
1.902	24.916	12.062	1.175
1.909	24.914	12.167	1.326
1.916	23.325	13.293	1.182
1.923	23.352	12.179	1.194
1.93	23.701	12.328	1.19
1.938	21.966	12.044	1.121
1.945	22.672	12.739	1.206
1.952	22.707	12.952	1.203
1.959	21.924	12.389	1.164
1.966	21.426	12.579	1.14
1.973	21.202	12.755	1.157
1.98	21.071	12.72	1.162
1.988	21.274	12.931	1.189
1.995	21.377	13.094	1.217
2.002	21.685	13.144	1.162
2.009	21.112	13.214	1.186
2.016	21.454	13.492	1.188
2.023	21.282	13.7	1.21
2.031	20.798	13.425	1.171
2.038	19.788	13.156	1.151
2.045	20.179	13.392	1.174
2.052	20.169	13.718	1.149
2.059	20.189	13.833	1.194
2.066	19.966	13.663	1.192
2.073	19.816	13.812	1.208
2.081	19.531	13.672	1.151
2.088	19.898	14.204	1.195
2.095	19.166	13.839	1.145
2.102	19.891	14.308	1.207
2.109	18.393	13.422	1.132
2.116	19.024	14.033	1.162
2.123	19.157	14.208	1.164
2.131	19.459	14.229	1.162
2.138	19.464	14.31	1.199
2.145	19.163	14.14	1.193
2.152	19.623	14.328	1.164
2.159	20.009	14.59	1.195
2.166	19.947	14.387	1.182
2.174	19.952	14.611	1.178
2.181	20.593	15.736	1.198
2.188	19.699	14.455	1.166
2.195	20.128	14.686	1.204
2.202	20.469	15.241	1.201
2.209	20.297	14.794	1.19
2.216	19.755	15.654	1.17
2.224	20.969	15.145	1.201
2.231	20.12	15.08	1.173
2.238	19.937	14.794	1.147
2.245	20.495	14.906	1.197
2.252	20.219	14.686	1.188
2.259	19.84	14.664	1.182
2.266	20.175	14.319	1.147
2.274	20.608	14.684	1.169
2.281	19.964	14.469	1.172
2.288	20.708	14.852	1.186
2.295	20.768	14.974	1.204
2.302	19.464	13.995	1.153
2.309	20.096	14.663	1.166
2.317	20.233	14.361	1.191
2.324	21.282	14.263	1.134
2.331	20.585	14.717	1.198
2.338	20.553	14.714	1.18
2.345	20.41	14.31	1.188
2.352	20.158	14.121	1.166
2.359	19.536	13.855	1.132
2.367	20.397	13.948	1.155
2.374	19.806	13.884	1.166
2.381	20.334	13.705	1.159
2.388	20.587	13.927	1.174
2.395	20.58	13.776	1.162
2.402	20.729	13.625	1.169
2.409	20.82	13.457	1.16
2.417	20.678	14.468	1.137
2.424	21.015	13.663	1.197
2.431	21.721	13.766	1.177
2.438	21.197	13.596	1.179
2.445	21.317	13.579	1.185
2.452	21.34	13.67	1.163
2.46	21.452	13.747	1.177
2.467	21.344	13.486	1.155
2.474	20.666	13.014	1.136
2.481	21.664	13.632	1.184
2.488	21.259	13.441	1.156
2.495	21.57	13.503	1.178
2.502	20.735	13.681	1.152
2.51	21.278	13.93	1.166
2.517	20.907	13.75	1.151
2.524	20.431	13.51	1.152
2.531	20.75	14.01	1.157
2.538	19.304	13.177	1.102
2.545	20.514	13.742	1.169
2.552	20.56	13.959	1.159
2.56	20.507	14.091	1.188
2.567	19.609	13.708	1.136
2.574	20.086	13.739	1.14
2.581	20.325	14.296	1.193
2.588	20.921	14.387	1.167
2.595	19.989	13.934	1.206
2.603	20.154	13.921	1.163
2.61	20.082	14.035	1.181
2.617	19.689	13.963	1.154
2.624	19.994	13.739	1.143
2.631	20.113	14.152	1.16
2.638	19.354	13.534	1.151
2.645	19.533	13.864	1.159
2.653	19.731	13.835	1.172
2.66	19.463	13.86	1.161
2.667	19.388	13.688	1.18
2.674	19.319	13.674	1.147
2.681	18.779	13.183	1.126
2.688	19.058	13.553	1.172
2.695	18.917	13.248	1.197
2.703	19.17	13.319	1.168
2.71	18.993	13.039	1.183
2.717	18.213	12.83	1.123
2.724	18.179	12.816	1.132
2.731	18.085	12.908	1.159
2.738	18.812	12.952	1.181
2.746	18.045	12.617	1.155
2.753	17.995	12.755	1.146
2.76	17.879	12.838	1.159
2.767	17.464	12.681	1.141
2.774	17.797	12.734	1.159
2.781	17.492	12.62	1.185
2.788	17.669	12.538	1.163
2.796	17.15	12.238	1.162
2.803	17.523	12.578	1.163
2.81	16.989	12.412	1.131
2.817	16.982	12.465	1.186
2.824	17.341	12.227	1.14
2.831	16.848	12.163	1.156
2.838	16.691	12.364	1.184
2.846	17.25	12.373	1.153
2.853	16.425	12.124	1.116
2.86	16.158	11.902	1.103
2.867	16.866	12.004	1.158
2.874	16.623	12.211	1.15
2.881	16.276	12.035	1.145
2.889	16.573	12.673	1.179
2.896	16.636	12.497	1.197
2.903	16.388	12.215	1.175
2.91	16.021	12.218	1.167
2.917	16.339	12.36	1.201
2.924	15.825	12.274	1.162
2.931	16.112	12.219	1.176
2.939	15.06	11.81	1.111
2.946	15.617	12.448	1.213
2.953	15.636	12.106	1.168
2.96	15.897	12.204	1.162
2.967	15.549	12.03	1.158
2.974	16.582	12.54	1.221
2.981	15.805	12.515	1.183
2.989	15.941	12.186	1.171
2.996	16.907	12.327	1.157
3.003	16.757	12.079	1.18
3.01	16.515	12.663	1.189
3.017	16.131	12.559	1.154
3.024	16.578	12.447	1.185
3.032	16.767	12.43	1.178
3.039	16.328	12.191	1.176
3.046	17.243	12.562	1.195
3.053	16.602	12.546	1.162
3.06	16.905	12.368	1.192
3.067	16.303	12.45	1.163
3.074	16.351	12.363	1.138
3.082	16.982	12.561	1.16
3.089	16.551	12.356	1.211
3.096	16.536	12.186	1.167
3.103	17.211	12.437	1.162
3.11	16.112	12.348	1.173
3.117	16.199	12.466	1.149
3.124	16.27	12.341	1.171
3.132	16.171	12.125	1.177
3.139	16.638	12.549	1.197
3.146	16.303	12.589	1.168
3.153	15.889	12.562	1.179
3.16	16.2	12.684	1.183
3.167	17.672	12.097	1.171
3.175	15.174	11.611	1.108
3.182	16.294	12.829	1.176
3.189	16.457	12.306	1.186
3.196	16.361	12.334	1.169
3.203	16.494	12.641	1.195
3.21	16.276	12.167	1.168
3.217	16.075	12.242	1.144
3.225	16.383	12.091	1.168
3.232	16.385	11.746	1.17
3.239	15.785	11.685	1.132
3.246	16.194	12.017	1.19
3.253	16.689	12.791	1.182
3.26	16.239	11.639	1.142
3.267	16.437	12.175	1.159
3.275	17.018	12.147	1.174
3.282	16.553	11.859	1.143
3.289	16.515	13.375	1.161
3.296	17.491	12.017	1.162
3.303	16.354	12.342	1.155
3.31	16.051	12.369	1.103
3.318	16.402	12.375	1.191
3.325	16.332	12.278	1.15
3.332	16.797	12.95	1.523
3.339	16.402	12.531	1.161
3.346	16.755	13.043	1.193
3.353	16.744	12.531	1.215
3.36	16.443	12.833	1.194
3.368	17.108	12.987	1.203
3.375	16.542	12.735	1.212
3.382	16.662	12.592	1.244
3.389	16.798	12.992	1.182
3.396	16.562	12.706	1.181
3.403	17.19	13.117	1.221
3.41	17.388	12.976	1.236
3.418	16.772	13.081	1.204
3.425	18.112	13.579	1.268
3.432	17.998	12.982	1.218
3.439	17.448	13.508	1.205
3.446	18.148	13.265	1.225
3.453	18.464	13.61	1.218
3.461	18.451	13.477	1.274
3.468	19.255	13.174	1.24
3.475	19.536	13.145	1.259
3.482	19.379	13.896	1.286
3.489	19.342	13.703	1.217
3.496	20.078	13.673	1.3
3.503	20.371	13.947	1.291
3.511	20.484	13.31	1.272
3.518	19.997	13.279	1.252
3.525	18.928	12.77	1.139
3.532	20.622	13.498	1.287
3.539	21.132	13.353	1.243
3.546	21.62	13.245	1.257
3.553	21.042	12.852	1.22
3.561	21.53	13.15	1.253
3.568	21.248	13.262	1.248
3.575	21.982	13.386	1.263
3.582	21.722	13.219	1.249
3.589	21.54	13.127	1.251
3.596	22.058	12.845	1.246
3.604	22.149	12.867	1.285
3.611	23.371	13.395	1.264
3.618	23.354	12.594	1.243
3.625	22.456	12.741	1.266
3.632	22.571	12.736	1.232
3.639	22.711	13.29	1.237
3.646	22.837	13.197	1.266
3.654	22.332	12.724	1.246
3.661	22.965	12.643	1.289
3.668	23.493	12.189	1.241
3.675	22.176	13.144	1.217
3.682	21.389	11.876	1.185
3.689	22.615	13.664	1.234
3.696	22.425	12.861	1.214
3.704	22.981	12.637	1.258
3.711	22.385	12.601	1.224
3.718	22.421	11.969	1.19
3.725	22.066	12.265	1.173
3.732	23.014	11.958	1.194
3.739	21.899	11.923	1.238
3.747	22.951	11.546	1.177
3.754	21.994	11.023	1.109
3.761	23.196	11.9	1.195
3.768	22.496	11.364	1.19
3.775	22.436	10.895	1.141
3.782	22.188	10.605	1.141
3.789	22.603	10.841	1.105
3.797	24.183	10.947	1.215
3.804	22.304	10.11	1.099
3.811	24.279	10.407	1.187
3.818	23.215	10.985	1.19
3.825	23.326	10.734	1.215
3.832	23.674	10.019	1.239
3.839	26.211	10.953	1.125
3.847	22.989	10.717	1.154
3.854	24.055	10.818	1.243
3.861	26.789	10.613	1.186
3.868	24.35	10.584	1.193
3.875	22.537	10.619	1.203
3.882	21.778	10.413	1.192
3.889	21.555	10.214	1.137
3.897	21.57	10.216	1.149
3.904	21.522	10.516	1.183
3.911	20.968	10.585	1.165
3.918	21.55	10.583	1.111
3.925	20.494	11.036	1.157
3.932	21.317	10.868	1.161
3.94	22.544	11.697	1.195
3.947	20.835	11.275	1.174
3.954	18.705	10.42	1.124
3.961	22.732	11.564	1.221
3.968	19.715	10.891	1.16
3.975	19.564	11.305	1.156
3.982	19.111	11.065	1.197
3.99	19.838	11.64	1.284
3.997	17.645	11.819	1.145
4.004	18.794	11.998	1.188
4.011	18.921	11.948	1.325
4.018	17.95	12.259	1.168
4.025	18.161	11.952	1.165
4.032	17.792	11.709	1.204
4.04	18.322	12.301	1.24
4.047	17.657	11.772	1.211
4.054	17.451	13.101	1.25
4.061	18.226	12.312	1.204
4.068	18.889	12.582	1.26
4.075	17.314	11.904	1.226
4.083	17.707	12.387	1.208
4.09	17.897	12.647	1.206
4.097	17.273	12.439	1.166
4.104	19.301	14.111	1.259
4.111	17.661	12.384	1.195
4.118	18.548	12.22	1.221
4.125	18.704	12.668	1.292
4.133	20.191	13.677	1.388
4.14	19.93	13.884	1.282
4.147	19.909	14.036	1.239
4.154	18.99	12.848	1.173
4.161	19.452	13.095	1.246
4.168	20.045	12.679	1.263
4.175	20.34	12.121	1.14
4.183	24.654	13.197	1.356
4.19	22.346	12.516	1.227
4.197	24.749	12.241	1.321
4.204	24.099	12.223	1.231
4.211	22.752	12.956	1.2
4.218	25.141	12.875	1.42
4.226	24.539	12.035	1.246
4.233	27.903	12.76	1.368
4.24	26.895	11.862	1.311
4.247	25.196	11.22	1.308
4.254	25.287	11.395	1.255
4.261	28.308	12.477	1.312
4.268	30.575	11.599	1.312
4.276	29.669	12.551	1.279
4.283	30.14	12.138	1.406
4.29	29.538	11.066	1.272
4.297	29.607	11.349	1.275
4.304	30.247	10.679	1.314
4.311	31.755	11.959	1.364
4.318	31.201	11.771	1.405
4.326	32.785	11.18	1.346
4.333	33.423	12.143	1.34
4.34	31.952	10.234	1.212
4.347	31.448	11.307	1.428
4.354	35.431	11.441	1.382
4.361	30.046	10.964	1.335
4.369	32.191	11.195	1.302
4.376	30.359	11.929	1.364
4.383	31.238	10.689	1.284
4.39	31.325	11.18	1.32
4.397	27.251	9.919	1.188
4.404	30.129	11.451	1.316
4.411	27.894	10.375	1.204
4.419	31.825	11.4	1.322
4.426	29.982	10.529	1.322
4.433	28.884	10.646	1.274
4.44	28.99	10.784	1.253
4.447	28.6	10.655	1.302
4.454	27.648	10.363	1.268
4.461	25.999	10.413	1.253
4.469	26.593	10.219	1.205
4.476	25.422	10.587	1.236
4.483	26.205	11.663	1.265
4.49	27.922	11.176	1.307
4.497	26.211	10.499	1.311
4.504	26.256	10.556	1.272
4.512	25.263	11.057	1.241
4.519	23.979	10.857	1.3
4.526	24.48	10.919	1.284
4.533	25.266	11.545	1.27
4.54	25.147	11.511	1.286
4.547	24.834	11.346	1.271
4.554	23.5	11.707	1.281
4.562	23.996	11.542	1.3
4.569	24.165	11.534	1.315
4.576	22.121	12.088	1.218
4.583	24.118	12.289	1.3
4.59	24.081	12.462	1.33
4.597	25.819	12.292	1.269
4.604	23.393	12.04	1.286
4.612	23.699	12.424	1.291
4.619	23.832	12.227	1.28
4.626	23.975	12.432	1.33
4.633	23.974	12.299	1.289
4.64	23.872	12.457	1.315
4.647	24.815	12.311	1.303
4.655	25.232	12.076	1.306
4.662	23.901	12.449	1.309
4.669	23.666	12.524	1.299
4.676	23.561	12.025	1.258
4.683	23.205	12.01	1.282
4.69	23.384	12.638	1.32
4.697	23.169	12.451	1.305
4.705	22.872	12.307	1.248
4.712	23.157	12.35	1.267
4.719	22.151	12.333	1.248
4.726	22.749	12.594	1.295
4.733	21.613	12.016	1.225
4.74	22.667	12.774	1.324
4.747	22.149	12.469	1.305
4.755	22.683	12.038	1.312
4.762	21.98	12.555	1.219
4.769	22.326	12.085	1.283
4.776	21.882	12.271	1.265
4.783	21.147	12.572	1.263
4.79	21.209	11.842	1.261
4.798	21.744	12.892	1.256
4.805	21.371	12.082	1.259
4.812	23.051	12.357	1.259
4.819	20.387	12.16	1.266
4.826	21.328	12.196	1.261
4.833	21.103	12.127	1.254
4.84	19.319	11.939	1.235
4.848	19.815	12.337	1.266
4.855	19.932	12.23	1.277
4.862	19.951	12.317	1.336
4.869	20.185	12.254	1.246
4.876	19.795	12.769	1.279
4.883	19.049	12.699	1.261
4.89	19.795	12.948	1.32
4.898	19.349	12.774	1.262
4.905	18.598	12.179	1.244
4.912	19.092	12.679	1.289
4.919	18.703	12.442	1.248
4.926	18.583	12.943	1.251
4.933	18.312	12.512	1.253
4.941	19.302	12.731	1.3
4.948	18.495	12.638	1.261
4.955	18.275	12.05	1.254
4.962	19.151	12.436	1.272
4.969	18.351	12.373	1.252
4.976	18.283	12.318	1.271
4.983	17.651	12.311	1.202
4.991	17.812	12.507	1.216
4.998	17.781	12.257	1.218
5.005	17.66	15.145	1.221
5.012	17.859	13.949	1.252
5.019	17.394	12.107	1.296
5.026	17.398	11.987	1.229
5.033	17.379	11.736	1.203
5.041	17.199	11.721	1.157
5.048	16.939	11.549	1.158
5.055	17.382	11.619	1.164
5.062	16.904	11.814	1.18
5.069	17.644	12.143	1.174
5.076	18.01	12.418	1.196
5.084	18.293	11.626	1.185
5.091	17.577	11.656	1.195
5.098	17.962	11.835	1.222
5.105	17.263	11.326	1.154
5.112	17.495	11.541	1.143
5.119	18.543	11.832	1.232
5.126	17.406	11.82	1.18
5.134	17.376	11.515	1.145
5.141	17.87	12.104	1.197
5.148	16.556	11.04	1.142
5.155	17.77	11.707	1.199
5.162	18.469	11.739	1.202
5.169	16.573	10.939	1.099
5.176	17.222	11.106	1.126
5.184	17.749	11.975	1.184
5.191	17.437	11.482	1.192
5.198	17.21	11.633	1.175
5.205	20.485	12.299	1.181
5.212	17.089	11.933	1.152
5.219	17.616	11.482	1.147
5.227	16.595	11.343	1.153
5.234	18.112	11.868	1.201
5.241	17.508	12.057	1.16
5.248	17.018	11.896	1.171
5.255	13.308	9.603	0.903
5.262	16.555	12.111	1.184
5.269	17.398	12.297	1.21
5.277	17.924	12.931	1.294
5.284	15.815	11.067	1.124
5.291	16.825	11.306	1.163
5.298	17.649	11.646	1.183
5.305	15.732	11.647	1.117
5.312	17.602	12.013	1.218
5.319	16.98	11.811	1.188
5.327	16.951	12.34	1.183
5.334	17.129	13.914	1.175
5.341	16.392	11.23	1.102
5.348	16.514	12.179	1.154
5.355	16.671	12.165	1.223
5.362	16.478	12.076	1.196
5.37	17.12	12.518	1.241
5.377	15.851	13.447	1.151
5.384	16.827	12.632	1.291
5.391	16.245	12.372	1.253
5.398	16.992	13.63	1.241
5.405	16.356	13.045	1.228
5.412	15.47	12.218	1.166
5.42	16.847	12.557	1.218
5.427	16.843	12.917	1.245
5.434	16.495	12.875	1.266
5.441	16.093	12.09	1.202
5.448	16.11	13.238	1.195
5.455	15.704	12.626	1.206
5.462	16.853	13.234	1.317
5.47	16.626	15.634	1.252
5.477	16.261	13.136	1.273
5.484	16.939	13.763	1.242
5.491	17.72	13.214	1.232
5.498	15.767	12.615	1.182
5.505	16.413	12.857	1.233
5.513	16.292	13.885	1.282
5.52	17.187	14.286	1.26
5.527	15.232	13.322	1.217
5.534	16.612	13.068	1.25
5.541	16.316	13.593	1.316
5.548	15.629	12.953	1.326
5.555	15.731	13.499	1.299
5.563	15.841	12.988	1.243
5.57	16.383	13.663	1.34
5.577	15.31	12.657	1.215
5.584	15.948	13.32	1.294
5.591	15.966	13.447	1.306
5.598	16.078	13.081	1.314
5.605	15.591	13.228	1.33
5.613	15.694	13.31	1.261
5.62	15.901	13.097	1.332
5.627	16.109	13.215	1.443
5.634	15.996	13.14	1.309
5.641	16.302	13.049	1.298
5.648	16.243	13.375	1.328
5.656	15.917	13.328	1.318
5.663	16.181	12.943	1.32
5.67	15.826	12.747	1.288
5.677	16.099	13.055	1.3
5.684	16.147	13.003	1.331
5.691	15.462	12.85	1.287
5.698	16.171	12.788	1.31
5.706	15.696	12.695	1.286
5.713	15.916	12.744	1.35
5.72	16.274	12.898	1.328
5.727	16.292	12.706	1.319
5.734	16.179	12.696	1.341
5.741	15.929	12.772	1.341
5.748	16.412	13.132	1.325
5.756	16.431	12.972	1.358
5.763	16.55	13.305	1.392
5.77	16.273	12.941	1.368
5.777	16.873	13.46	1.385
5.784	16.387	13.228	1.372
5.791	16.169	13.552	1.371
5.799	16.369	13.379	1.403
5.806	16.05	13.49	1.391
5.813	16.398	13.463	1.413
5.82	16.129	13.778	1.393
5.827	16.928	14	1.418
5.834	16.157	14.055	1.424
5.841	16.189	14.042	1.412
5.849	16.369	14.587	1.422
5.856	16.813	14.61	1.459
5.863	16.734	14.951	1.464
5.87	16.556	14.821	1.437
5.877	16.181	14.981	1.479
5.884	16.035	15.183	1.443
5.891	16.386	15.517	1.478
5.899	16.288	15.753	1.503
5.906	15.983	15.767	1.468
5.913	16.074	16.775	1.483
5.92	16.168	15.996	1.482
5.927	16.248	16.592	1.502
5.934	16.329	16.584	1.486
5.942	16.56	16.862	1.482
5.949	16.334	16.613	1.472
5.956	16.248	17.354	1.485
5.963	16.468	17.591	1.5
5.97	16.603	17.765	1.509
5.977	16.439	17.372	1.468
5.984	16.591	17.981	1.5
5.992	16.416	17.996	1.473
5.999	16.144	17.862	1.459
6.006	17.509	18.205	1.46
6.013	16.546	18.343	1.478
6.02	15.979	18.322	1.454
6.027	16.53	18.978	1.499
6.034	16.038	18.512	1.428
6.042	16.285	19.142	1.412
6.049	15.549	18.921	1.419
6.056	15.892	18.727	1.449
6.063	16.059	18.578	1.442
6.07	14.967	18.251	1.37
6.077	15.285	18.11	1.383
6.084	15.131	18.757	1.403
6.092	15.828	17.83	1.37
6.099	15.42	18.127	1.436
6.106	15.561	18.109	1.388
6.113	15.55	18.631	1.387
6.12	15.219	17.795	1.356
6.127	15.506	18.123	1.4
6.135	14.97	16.924	1.3
6.142	16.138	17.67	1.44
6.149	15.879	17.618	1.379
6.156	14.958	17.281	1.307
6.163	15.771	17.914	1.359
6.17	14.318	15.764	1.244
6.177	15.644	16.783	1.297
6.185	16.01	17.33	1.362
6.192	15.677	16.406	1.436
6.199	16.347	16.736	1.323
6.206	16.677	16.992	1.347
6.213	16.048	16.311	1.286
6.22	17.043	16.448	1.326
6.227	16.48	16.382	1.323
6.235	15.907	15.882	1.28
6.242	16.558	15.817	1.293
6.249	17.041	15.649	1.452
6.256	17.545	16.106	1.336
6.263	18.795	15.179	1.353
6.27	17.151	15.247	1.281
6.278	17.387	14.939	1.28
6.285	16.851	15.545	1.224
6.292	18.278	16.609	1.321
6.299	17.215	15.77	1.225
6.306	16.863	14.026	1.207
6.313	16.006	13.845	1.137
6.32	18.537	14.694	1.267
6.328	17.634	14.167	1.265
6.335	18.304	14.722	1.257
6.342	18.811	13.717	1.346
6.349	17.611	13.222	1.178
6.356	18.403	13.588	1.225
6.363	18.75	13.834	1.207
6.37	17.245	12.707	1.146
6.378	18.587	13.223	1.197
6.385	17.501	12.738	1.132
6.392	17.904	13.193	1.174
6.399	18.377	12.816	1.185
6.406	19.231	12.515	1.272
6.413	18.255	12.507	1.159
6.421	18.518	12.354	1.139
6.428	18.111	13.04	1.115
6.435	18.921	11.851	1.166
6.442	18.936	12.343	1.199
6.449	18.787	11.829	1.135
6.456	19.479	11.963	1.161
6.463	20.61	12.295	1.203
6.471	20.315	12.055	1.198
6.478	20.583	12.158	1.205
6.485	18.942	11.272	1.126
6.492	18.631	11.051	1.102
6.499	20.25	11.575	1.182
6.506	18.58	10.961	1.077
6.513	21.057	11.503	1.159
6.521	20.496	11.089	1.166
6.528	20.887	10.718	1.124
6.535	21.296	11.134	1.259
6.542	21.919	12.299	1.177
6.549	21.888	11.186	1.189
6.556	23.515	11.878	1.304
6.564	21.307	10.995	1.111
6.571	23.16	11.22	1.158
6.578	22.181	10.529	1.167
6.585	20.845	9.818	1.053
6.592	24.262	11.268	1.267
6.599	24.323	11.7	1.199
6.606	24.649	10.577	1.143
6.614	25.27	10.795	1.257
6.621	25.35	10.21	1.3
6.628	26.445	10.268	1.209
6.635	26.746	10.073	1.198
6.642	27.435	9.847	1.231
6.649	30.229	9.77	1.285
6.656	27.406	9.597	1.177
6.664	28.057	9.413	1.252
6.671	30.027	9.383	1.288
6.678	31.028	9.354	1.341
6.685	29.277	8.767	1.225
6.692	30.372	8.986	1.332
6.699	31.084	9.13	1.307
6.707	32.21	9.057	1.329
6.714	30.515	8.657	1.308
6.721	30.96	8.746	1.307
6.728	31.04	8.904	1.254
6.735	30.84	8.707	1.296
6.742	31.485	8.753	1.306
6.749	31.328	8.79	1.269
6.757	31.305	8.984	1.342
6.764	31.091	9.001	1.339
6.771	30.631	8.842	1.314
6.778	30.35	9.02	1.334
6.785	30.039	9.605	1.458
6.792	28.92	9.417	1.327
6.799	28.936	9.508	1.332
6.807	29.225	9.762	1.313
6.814	28.198	9.539	1.299
6.821	28.954	10.078	1.337
6.828	27.175	9.82	1.307
6.835	26.04	10.042	1.286
6.842	25.809	10.212	1.294
6.85	25.884	10.658	1.277
6.857	24.522	10.691	1.276
6.864	24.157	11.191	1.295
6.871	22.952	10.915	1.317
6.878	22.968	11.162	1.247
6.885	21.928	11.441	1.236
6.892	21.934	11.72	1.249
6.9	21.672	11.886	1.273
6.907	20.922	11.686	1.239
6.914	20.147	11.966	1.199
6.921	19.486	12.221	1.251
6.928	19.739	12.485	1.242
6.935	19.487	12.602	1.223
6.942	18.699	12.536	1.193
6.95	18.764	12.694	1.226
6.957	18.36	12.776	1.183
6.964	18.364	12.871	1.22
6.971	18.652	13.223	1.231
6.978	18.177	13.124	1.221
6.985	18.255	13.188	1.199
6.993	18.45	13.503	1.223
7	17.986	13.643	1.234
7.007	18.236	13.352	1.201
7.014	19.12	13.752	1.254
7.021	17.575	13.517	1.204
7.028	17.241	13.52	1.219
7.035	17.778	13.741	1.222
7.043	17.338	13.631	1.176
7.05	17.118	14.003	1.22
7.057	16.541	13.565	1.206
7.064	16.922	13.846	1.214
7.071	17.418	13.889	1.203
7.078	17.381	13.744	1.199
7.085	17.041	13.591	1.185
7.093	17.351	13.843	1.233
7.1	17.39	13.968	1.194
7.107	17.081	14.464	1.213
7.114	17.527	14.209	1.203
7.121	17.276	14.318	1.243
7.128	17.509	13.81	1.161
7.136	17.494	13.996	1.212
7.143	16.975	13.775	1.216
7.15	17.161	14.008	1.198
7.157	17.961	14.333	1.236
7.164	17.853	14.238	1.207
7.171	18.028	14.274	1.228
7.178	16.987	13.888	1.198
7.186	18.283	14.357	1.223
7.193	17.523	14.378	1.211
7.2	17.917	14.29	1.22
7.207	17.563	13.903	1.21
7.214	17.366	14.217	1.208
7.221	17.336	14.355	1.224
7.228	17.4	14.029	1.21
7.236	17.391	14.263	1.225
7.243	17.098	14.382	1.242
7.25	16.791	14.214	1.195
7.257	17.033	14.649	1.242
7.264	16.907	14.479	1.241
7.271	17.388	14.905	1.275
7.279	16.099	14.717	1.264
7.286	16.184	14.578	1.254
7.293	15.908	14.684	1.23
7.3	16.462	15.17	1.331
7.307	16.372	15.218	1.269
7.314	15.8	14.784	1.226
7.321	15.527	14.806	1.233
7.329	15.888	15.291	1.211
7.336	15.112	14.985	1.219
7.343	16.757	16.212	1.252
7.35	15.097	15.173	1.229
7.357	16.738	15.537	1.244
7.364	13.101	13.284	1.142
7.371	14.315	14.741	1.233
7.379	14.912	15.399	1.31
7.386	14.33	15.687	1.329
7.393	14.443	15.156	1.283
7.4	13.968	14.736	1.268
7.407	14.252	15.199	1.332
7.414	14.374	14.847	1.267
7.422	14.356	14.659	1.276
7.429	14.76	14.733	1.241
7.436	14.437	15.228	1.272
7.443	14.231	14.842	1.324
7.45	14.491	14.869	1.397
7.457	14.455	15.024	1.292
7.464	14.552	14.733	1.296
7.472	14.369	14.716	1.31
7.479	15.773	15.955	1.345
7.486	14.641	13.834	1.222
7.493	14.813	14.94	1.261
7.5	15.263	15.401	1.334
7.507	15.243	14.816	1.323
7.514	15.597	14.288	1.243
7.522	15.162	15.05	1.288
7.529	15.526	14.556	1.243
7.536	15.111	14.603	1.248
7.543	15.475	14.648	1.239
7.55	15.76	14.281	1.254
7.557	15.611	13.766	1.267
7.565	16.802	14.069	1.281
7.572	15.35	13.729	1.253
7.579	16.013	13.819	1.312
7.586	16.174	13.974	1.268
7.593	16.711	13.988	1.303
7.6	15.762	13.509	1.235
7.607	16.294	13.802	1.288
7.615	16.107	13.696	1.262
7.622	16.347	13.781	1.265
7.629	16.97	15.051	1.267
7.636	16.533	13.269	1.203
7.643	17.944	13.727	1.272
7.65	16.736	14.005	1.319
7.657	17.011	14.33	1.292
7.665	17.647	14.058	1.29
7.672	17.346	14.133	1.263
7.679	17.541	14.194	1.246
7.686	18.642	14.504	1.261
7.693	19.121	15.076	1.303
7.7	17.965	14.111	1.292
7.708	17.972	15.114	1.346
7.715	19.032	14.736	1.509
7.722	18.708	15.06	1.299
7.729	17.409	14.149	1.257
7.736	18.491	14.487	1.281
7.743	18.394	14.804	1.285
7.75	18.426	14.731	1.349
7.758	18.462	14.44	1.299
7.765	20.032	14.68	1.31
7.772	18.575	14.852	1.297
7.779	18.854	14.808	1.302
7.786	18.931	14.384	1.324
7.793	19.208	14.06	1.336
7.8	19.29	15.091	1.297
7.808	19.365	13.547	1.309
7.815	19.42	13.609	1.275
7.822	20.073	13.58	1.283
7.829	20.685	14.01	1.317
7.836	19.564	13.369	1.258
7.843	19.641	13.324	1.259
7.85	20.153	13.695	1.338
7.858	19.774	13.712	1.272
7.865	20.032	13.85	1.313
7.872	20.052	13.585	1.3
7.879	20.336	13.488	1.277
7.886	19.828	13.356	1.317
7.893	19.382	13.18	1.218
7.901	20.49	13.698	1.25
7.908	20.691	13.098	1.244
7.915	20.624	12.651	1.256
7.922	21.181	13.635	1.239
7.929	20.633	15.83	1.208
7.936	20.572	12.972	1.215
7.943	22.118	12.768	1.275
7.951	23.831	13.945	1.261
7.958	21.443	12.259	1.165
7.965	21.209	14.057	1.3
7.972	20.126	12.923	1.188
7.979	20.841	12.884	1.207
7.986	20.875	12.917	1.248
7.994	21.117	12.925	1.243
8.001	21.953	12.968	1.263
8.008	25.094	13.063	1.248
8.015	23.207	12.318	1.217
8.022	23.222	15.03	1.233
8.029	23.486	11.889	1.259
8.036	24.383	11.678	1.323
8.044	24.14	11.8	1.267
8.051	25.683	12.06	1.252
8.058	27.104	11.6	1.26
8.065	26.062	11.826	1.305
8.072	26.209	11.15	1.284
8.079	27.052	10.874	1.283
8.086	28.406	11.189	1.282
8.094	29.566	11.074	1.323
8.101	28.76	10.896	1.274
8.108	30.132	11.263	1.332
8.115	29.575	10.573	1.301
8.122	30.212	11.234	1.346
8.129	32.242	11.856	1.325
8.137	31.333	11.33	1.474
8.144	30.395	11.245	1.37
8.151	31.523	11.696	1.373
8.158	31.007	11.637	1.368
8.165	31.085	12.038	1.387
8.172	30.482	11.923	1.386
8.179	29.182	12.211	1.443
8.187	30.426	12.626	1.365
8.194	29.203	13.05	1.422
8.201	30.367	13.131	1.374
8.208	27.357	13.5	1.302
8.215	27.844	14.397	1.338
8.222	27.025	13.89	1.345
8.229	25.694	14.417	1.344
8.237	25.332	14.699	1.353
8.244	24.123	14.506	1.305
8.251	22.413	13.868	1.232
8.258	23.622	14.986	1.265
8.265	21.325	14.29	1.176
8.272	22.577	15.273	1.292
8.279	21.556	15.368	1.302
8.287	21.649	15.564	1.302
8.294	20.779	15.621	1.254
8.301	20.234	15.062	1.247
8.308	21.146	15.818	1.267
8.315	20.544	15.598	1.267
8.322	21.734	15.349	1.238
8.33	20.634	15.749	1.295
8.337	20.594	15.877	1.263
8.344	20.373	16.803	1.257
8.351	20.456	15.563	1.267
8.358	20.589	15.748	1.269
8.365	20.036	15.78	1.249
8.372	18.805	14.585	1.161
8.38	20.987	14.823	1.194
8.387	19.727	16.196	1.249
8.394	21.057	15.345	1.237
8.401	19.722	14.971	1.226
8.408	20.527	15.022	1.208
8.415	20.751	15.205	1.219
8.422	21.47	14.62	1.244
8.43	20.895	14.513	1.249
8.437	23.411	15.261	1.333
8.444	21.182	14.806	1.185
8.451	21.362	13.877	1.282
8.458	23.059	14.184	1.274
8.465	23.032	14.948	1.209
8.473	22.165	13.57	1.24
8.48	23.186	13.862	1.244
8.487	22.898	14.031	1.45
8.494	22.421	13.809	1.199
8.501	21.761	12.705	1.13
8.508	23.934	14.241	1.242
8.515	25.969	13.377	1.266
8.523	26.769	13.627	1.331
8.53	27.917	13.08	1.373
8.537	27.508	12.577	1.242
8.544	29.128	13.041	1.274
8.551	30.21	13.025	1.342
8.558	30.222	12.326	1.315
8.565	31.316	12.391	1.399
8.573	32.763	12.521	1.358
8.58	31.993	12.776	1.403
8.587	31.995	11.937	1.362
8.594	32.993	11.951	1.408
8.601	33.562	11.931	1.42
8.608	33.604	12.19	1.446
8.616	34.304	12.038	1.437
8.623	35.263	12.181	1.484
8.63	35.85	12.12	1.464
8.637	34.733	12.165	1.445
8.644	34.821	12.405	1.472
8.651	34.453	12.741	1.48
8.658	34.275	13.081	1.477
8.666	34.215	13.462	1.467
8.673	32.536	13.741	1.481
8.68	31.806	14.067	1.46
8.687	30.872	14.688	1.462
8.694	28.79	14.659	1.428
8.701	27.21	15.225	1.412
8.708	26.852	16.102	1.427
8.716	26.066	16.063	1.393
8.723	24.078	16.204	1.345
8.73	23.068	16.67	1.358
8.737	22.632	17.196	1.329
8.744	21.758	17.51	1.333
8.751	21.652	18.096	1.341
8.759	21.374	18.134	1.329
8.766	20.237	18.319	1.289
8.773	20.396	18.364	1.302
8.78	20.326	18.589	1.316
8.787	19.562	18.496	1.298
8.794	19.331	18.165	1.267
8.801	18.911	18.507	1.277
8.809	19.109	18.778	1.241
8.816	18.86	18.901	1.279
8.823	18.359	18.777	1.268
8.83	18.43	18.736	1.267
8.837	17.915	18.874	1.29
8.844	17.429	19.207	1.3
8.851	16.849	19.101	1.288
8.859	17.13	19.338	1.332
8.866	16.82	19.321	1.307
8.873	15.502	19.327	1.303
8.88	15.356	20.088	1.358
8.887	14.687	19.862	1.329
8.894	15.027	20.493	1.374
8.902	14.677	20.483	1.361
8.909	14.318	19.657	1.356
8.916	14.474	19.859	1.364
8.923	14.605	19.593	1.343
8.93	14.382	19.665	1.356
8.937	14.434	18.557	1.325
8.944	14.557	18.74	1.358
8.952	14.756	18.502	1.358
8.959	14.98	18.342	1.35
8.966	15.142	18.18	1.35
8.973	15.341	17.765	1.331
8.98	15.369	17.665	1.316
8.987	15.594	17.137	1.294
8.994	15.884	16.852	1.317
9.002	15.603	16.38	1.284
9.009	16.257	17.083	1.342
9.016	17.28	17.09	1.317
9.023	16.872	16.245	1.284
9.03	17.183	16.317	1.334
9.037	18.036	16.418	1.333
9.045	18.649	16.12	1.297
9.052	18.54	15.219	1.267
9.059	19.137	15.144	1.287
9.066	19.597	15.026	1.242
9.073	20.162	14.743	1.259
9.08	21.093	14.364	1.283
9.087	21.316	13.973	1.256
9.095	22.36	13.75	1.259
9.102	23.245	13.663	1.255
9.109	22.741	13.185	1.232
9.116	22.968	12.783	1.202
9.123	24.146	12.621	1.25
9.13	25.511	12.181	1.2
9.137	25.381	11.542	1.203
9.145	26.672	11.388	1.236
9.152	26.871	10.828	1.218
9.159	28.025	10.892	1.262
9.166	28.052	10.307	1.245
9.173	28.646	9.851	1.321
9.18	30.402	9.95	1.265
9.188	30.652	9.68	1.296
9.195	31.16	9.513	1.283
9.202	32.581	9.138	1.299
9.209	32.97	9.018	1.335
9.216	33.73	8.869	1.321
9.223	34.523	8.825	1.368
9.23	34.25	8.951	1.338
9.238	35.582	8.711	1.39
9.245	34.412	8.875	1.344
9.252	34.251	9.117	1.376
9.259	35.028	9.486	1.369
9.266	33.744	9.775	1.372
9.273	33.905	9.726	1.353
9.28	31.171	9.486	1.322
9.288	31.449	10.174	1.339
9.295	30.789	10.245	1.357
9.302	30.156	10.279	1.3
9.309	28.57	11.316	1.281
9.316	27.661	11.487	1.282
9.323	27.042	11.469	1.245
9.331	27.136	12.055	1.258
9.338	27.334	11.466	1.253
9.345	30.192	11.81	1.253
9.352	24.804	11.831	1.191
9.359	25.812	12.077	1.208
9.366	24.738	11.848	1.178
9.373	25.207	12.344	1.206
9.381	25.086	12.194	1.196
9.388	24.395	11.748	1.162
9.395	24.6	12.439	1.229
9.402	24.032	12.26	1.182
9.409	25.542	12.263	1.215
9.416	23.427	12.083	1.165
9.423	24.516	12.682	1.201
9.431	25.002	12.044	1.17
9.438	24.214	12.521	1.231
9.445	24.022	12.169	1.184
9.452	23.636	12.718	1.191
9.459	23.595	11.927	1.212
9.466	22.462	11.339	1.118
9.474	23.954	11.621	1.166
9.481	24.338	11.911	1.148
9.488	23.458	11.349	1.16
9.495	24.13	11.356	1.164
9.502	25.447	11.36	1.174
9.509	25.206	11.276	1.15
9.516	27.764	11.013	1.137
9.524	25.115	11.13	1.165
9.531	26.672	11.057	1.254
9.538	25.852	10.501	1.135
9.545	27.376	10.735	1.159
9.552	27.164	10.758	1.207
9.559	27.71	10.922	1.171
9.566	27.442	11.077	1.155
9.574	28.312	10.72	1.17
9.581	28.133	10.287	1.163
9.588	27.773	10.403	1.212
9.595	28.212	10.497	1.194
9.602	28.172	10.361	1.183
9.609	28.962	10.339	1.217
9.617	29.277	10.296	1.215
9.624	31.008	10.178	1.245
9.631	31.791	9.972	1.246
9.638	33.998	9.934	1.287
9.645	35.597	9.607	1.317
9.652	38.222	9.924	1.411
9.659	37.54	9.433	1.401
9.667	38.369	9.389	1.423
9.674	39.697	9.257	1.417
9.681	38.527	9.348	1.442
9.688	39.178	9.094	1.412
9.695	39.799	9.165	1.431
9.702	40.065	9.435	1.464
9.709	38.903	9.231	1.424
9.717	37.607	9.239	1.421
9.724	37.265	9.556	1.415
9.731	34.965	9.438	1.385
9.738	33.026	9.561	1.349
9.745	31.15	10.096	1.303
9.752	29.05	10.132	1.249
9.76	28.55	10.825	1.27
9.767	27.278	10.636	1.236
9.774	25.584	11.272	1.209
9.781	25.447	11.031	1.198
9.788	25.712	11.537	1.231
9.795	23.431	11.334	1.164
9.802	23.625	11.884	1.185
9.81	22.683	11.497	1.147
9.817	23.385	11.588	1.185
9.824	22.678	11.685	1.155
9.831	22.394	11.876	1.164
9.838	22.371	11.839	1.167
9.845	22.005	12.084	1.149
9.852	21.636	12.289	1.166
9.86	20.973	12.269	1.143
9.867	21.027	12.093	1.149
9.874	21.519	12.639	1.177
9.881	21.124	12.718	1.183
9.888	20.956	12.631	1.196
9.895	20.7	12.726	1.175
9.902	20.918	12.854	1.159
9.91	20.831	12.895	1.178
9.917	20.448	12.883	1.157
9.924	20.17	13.114	1.166
9.931	19.484	12.768	1.136
9.938	20.655	13.58	1.192
9.945	20.423	12.964	1.152
9.953	20.147	13.356	1.163
9.96	19.849	13.164	1.162
9.967	19.326	12.963	1.133
9.974	19.465	13.366	1.169
9.981	19.769	13.545	1.201
9.988	19.59	13.73	1.174
9.995	19.227	13.924	1.18
10.003	18.7	13.323	1.161
10.01	19.056	13.447	1.175
10.017	18.322	13.618	1.164
10.024	18.145	13.603	1.189
10.031	17.968	13.495	1.161
10.038	18.415	13.707	1.171
10.045	18.202	13.807	1.17
10.053	17.611	13.781	1.144
10.06	17.734	14.088	1.171
10.067	18.094	13.655	1.171
10.074	17.348	13.796	1.148
10.081	17.73	13.883	1.155
10.088	17.624	14.189	1.169
10.096	17.837	13.861	1.165
10.103	18.126	14.014	1.166
10.11	17.436	13.641	1.177
10.117	17.557	13.664	1.182
10.124	17.256	14.06	1.163
10.131	17.78	14.072	1.189
10.138	17.007	13.442	1.191
10.146	17.066	13.946	1.213
10.153	17.563	14.147	1.193
10.16	17.117	14.039	1.186
10.167	16.681	13.925	1.18
10.174	17.34	14.345	1.209
10.181	17.246	14.364	1.217
10.188	17.106	14.173	1.239
10.196	17.797	14.137	1.198
10.203	16.593	14.402	1.199
10.21	17.006	14.471	1.178
10.217	16.9	14.465	1.206
10.224	16.925	14.396	1.208
10.231	16.122	14.052	1.169
10.239	16.759	14.452	1.192
10.246	16.651	14.335	1.184
10.253	16.494	14.291	1.194
10.26	16.893	14.391	1.198
10.267	16.772	14.037	1.19
10.274	16.225	14.013	1.15
10.281	17.228	14.411	1.181
10.289	16.959	14.389	1.217
10.296	17.058	14.12	1.229
10.303	17.458	14.147	1.218
10.31	17.086	14.383	1.222
10.317	16.974	14.303	1.201
10.324	17.422	14.222	1.229
10.331	17.13	14.693	1.206
10.339	16.587	13.875	1.178
10.346	16.938	14.088	1.186
10.353	17.846	14.695	1.212
10.36	17.425	14.193	1.233
10.367	17.692	14.392	1.225
10.374	18.502	14.092	1.199
10.382	17.267	13.934	1.185
10.389	18.27	13.992	1.199
10.396	17.974	13.968	1.211
10.403	18.137	14.32	1.185
10.41	20.725	13.551	1.198
10.417	18.936	14.109	1.21
10.424	18.506	13.824	1.188
10.432	18.394	13.659	1.201
10.439	18.677	13.683	1.219
10.446	18.701	14.186	1.247
10.453	19.109	13.708	1.234
10.46	18.629	14.158	1.185
10.467	18.41	13.584	1.169
10.474	18.779	13.876	1.189
10.482	19.165	14.05	1.216
10.489	18.816	14.017	1.205
10.496	19.457	14.021	1.272
10.503	18.641	13.903	1.205
10.51	18.342	14.219	1.223
10.517	18.331	14.082	1.245
10.525	18.346	13.771	1.238
10.532	17.782	14.107	1.227
10.539	18.282	14.171	1.27
10.546	18.88	14.068	1.252
10.553	18.434	13.995	1.291
10.56	18.212	13.805	1.25
10.567	18.06	13.962	1.25
10.575	17.817	14.218	1.252
10.582	17.741	14.125	1.247
10.589	18.109	14.494	1.269
10.596	17.686	14.428	1.278
10.603	17.586	14.325	1.271
10.61	17.594	14.265	1.279
10.617	17.572	14.054	1.273
10.625	17.319	14.321	1.261
10.632	17.03	14.284	1.274
10.639	17.057	14.212	1.291
10.646	16.594	14.239	1.271
10.653	16.247	14.254	1.267
10.66	16.328	14.668	1.275
10.668	17.055	14.464	1.276
10.675	16.223	14.316	1.285
10.682	15.839	14.132	1.281
10.689	16.044	14.398	1.263
10.696	16.008	14.271	1.253
10.703	16.077	14.571	1.298
10.71	17.11	14.227	1.288
10.718	15.583	13.92	1.273
10.725	15.84	14.487	1.294
10.732	15.573	14.507	1.272
10.739	16.232	14.571	1.307
10.746	16.008	14.669	1.311
10.753	15.771	14.275	1.28
10.76	15.465	14.697	1.265
10.768	16.051	14.528	1.319
10.775	15.461	14.359	1.284
10.782	15.93	14.612	1.314
10.789	16.031	14.854	1.301
10.796	15.867	14.326	1.289
10.803	16.081	14.325	1.277
10.811	16.931	15.092	1.326
10.818	16.373	14.464	1.303
10.825	16.238	15.403	1.298
10.832	16.564	14.131	1.266
10.839	16.775	14.327	1.333
10.846	17.241	14.655	1.292
10.853	16.862	14.268	1.281
10.861	17.967	14.239	1.282
10.868	19.109	14.454	1.275
10.875	18.43	14.263	1.266
10.882	18.737	13.79	1.262
10.889	18.931	13.959	1.251
10.896	19.508	13.53	1.27
10.903	19.783	13.102	1.207
10.911	21.092	13.175	1.26
10.918	21.187	12.846	1.237
10.925	21.089	12.786	1.247
10.932	22.184	12.404	1.232
10.939	22.171	12.131	1.216
10.946	22.416	12.072	1.202
10.954	22.861	12.042	1.191
10.961	23.16	11.912	1.189
10.968	23.102	11.714	1.209
10.975	24.318	11.32	1.17
10.982	24.453	11.125	1.176
10.989	24.933	11.281	1.174
10.996	24.918	10.671	1.153
11.004	25.079	10.587	1.159
11.011	25.972	10.626	1.18
11.018	26.174	9.999	1.153
11.025	28.21	10.262	1.207
11.032	28.074	9.701	1.167
11.039	29.306	10.038	1.268
11.046	30.944	9.759	1.23
11.054	31.374	9.569	1.245
11.061	31.905	10.176	1.277
11.068	33.537	9.558	1.311
11.075	34.339	9.719	1.374
11.082	35.374	9.725	1.37
11.089	35.918	9.489	1.362
11.097	36.75	9.493	1.395
11.104	39.476	9.5	1.387
11.111	37.693	9.579	1.409
11.118	38.815	9.424	1.409
11.125	38.974	9.596	1.431
11.132	39.308	9.759	1.466
11.139	37.638	9.346	1.407
11.147	37.602	9.55	1.441
11.154	38.058	9.249	1.435
11.161	37.379	9.37	1.402
11.168	37.291	9.359	1.384
11.175	37.095	9.662	1.409
11.182	36.071	9.687	1.42
11.189	35.63	9.611	1.365
11.197	36.05	9.894	1.367
11.204	38.239	9.524	1.343
11.211	33.96	9.472	1.327
11.218	33.749	9.818	1.337
11.225	32.905	9.523	1.252
11.232	33.746	9.866	1.264
11.24	31.764	10.084	1.246
11.247	30.722	9.713	1.198
11.254	30.14	9.875	1.205
11.261	30.029	10.314	1.189
11.268	29.582	10.444	1.178
11.275	30.137	10.509	1.168
11.282	28.688	10.586	1.122
11.29	29.031	10.556	1.17
11.297	28.265	10.77	1.118
11.304	28.174	10.616	1.111
11.311	28.671	10.555	1.169
11.318	26.829	10.246	1.077
11.325	27.784	10.542	1.094
11.332	28.468	10.668	1.103
11.34	29.003	10.642	1.112
11.347	28.609	10.822	1.106
11.354	28.508	10.315	1.108
11.361	29.044	10.515	1.119
11.368	28.784	10.532	1.152
11.375	28.877	10.403	1.115
11.383	29.766	10.939	1.156
11.39	30.169	10.721	1.148
11.397	29.803	10.672	1.158
11.404	29.432	10.498	1.151
11.411	29.818	10.667	1.141
11.418	29.28	10.735	1.138
11.425	28.249	10.489	1.115
11.433	28.685	10.63	1.168
11.44	28.507	10.857	1.178
11.447	28.062	10.831	1.162
11.454	28.345	10.968	1.183
11.461	27.804	10.75	1.13
11.468	27.367	11.154	1.194
11.475	27.477	11.306	1.168
11.483	26.423	11.023	1.154
11.49	25.905	11.165	1.166
11.497	25.252	11.321	1.154
11.504	24.789	11.194	1.155
11.511	24.763	11.531	1.179
11.518	23.9	11.899	1.256
11.526	23.232	11.716	1.149
11.533	22.682	12.272	1.15
11.54	22.11	11.669	1.127
11.547	20.985	12.123	1.143
11.554	19.932	12.369	1.124
11.561	20.369	12.848	1.156
11.568	19.755	12.743	1.143
11.576	20.257	13.777	1.118
11.583	18.31	12.841	1.129
11.59	16.698	12.756	1.076
11.597	17.245	13.662	1.147
11.604	16.501	13.769	1.133
11.611	15.668	13.535	1.097
11.618	15.428	14.39	1.089
11.626	14.537	13.382	1.046
11.633	15.045	13.563	1.096
11.64	14.742	14.207	1.096
11.647	14.644	14.313	1.09
11.654	15.014	14.268	1.098
11.661	13.755	13.839	1.096
11.669	14.065	15.037	1.084
11.676	15.344	14.48	1.099
11.683	13.932	14.133	1.065
11.69	13.427	13.846	1.063
11.697	13.707	13.956	1.057
11.704	14.284	14.983	1.126
11.711	13.922	14.399	1.106
11.719	14.285	14.214	1.101
11.726	14.256	14.079	1.084
11.733	13.754	13.738	1.071
11.74	13.894	14.396	1.063
11.747	14.739	14.305	1.112
11.754	14.416	14.176	1.083
11.761	14.284	14.18	1.1
11.769	14.321	13.876	1.069
11.776	14.248	13.654	1.074
11.783	14.799	14.175	1.1
11.79	14.575	14.064	1.095
11.797	15.346	14.654	1.097
11.804	15.071	14.311	1.135
11.812	14.137	13.951	1.1
11.819	14.774	14.441	1.118
11.826	14.612	14.408	1.112
11.833	14.464	14.444	1.127
11.84	14.53	14.842	1.125
11.847	14.659	14.671	1.126
11.854	14.305	14.481	1.148
11.862	13.83	14.67	1.178
11.869	13.629	14.89	1.105
11.876	14.172	15.229	1.126
11.883	14.049	14.407	1.129
11.89	13.521	15.39	1.129
11.897	13.887	14.673	1.131
11.904	13.314	14.283	1.128
11.912	13.666	14.39	1.124
11.919	13.322	14.415	1.138
11.926	13.38	14.618	1.125
11.933	12.676	13.821	1.059
11.94	13.202	14.364	1.117
11.947	13.235	15.638	1.124
11.954	13.306	14.577	1.139
11.962	12.652	14.652	1.123
11.969	12.724	14.251	1.129
11.976	13.016	14.631	1.146
11.983	12.877	14.33	1.146
11.99	13.001	14.346	1.25
11.997	12.931	14.533	1.156
12.005	12.639	14.216	1.151
12.012	13.131	14.19	1.14
12.019	12.911	14.124	1.132
12.026	13.2	14.164	1.195
12.033	12.995	14.631	1.155
12.04	13.09	14.394	1.164
12.047	13.195	14.353	1.173
12.055	13.329	13.914	1.156
12.062	13.487	13.959	1.191
12.069	13.119	14.026	1.137
12.076	14.382	14.732	1.178
12.083	13.513	14.664	1.208
12.09	13.319	14.226	1.146
12.097	13.424	14.996	1.162
12.105	13.784	14.608	1.184
12.112	14.223	14.809	1.185
12.119	13.911	14.734	1.226
12.126	13.835	14.419	1.16
12.133	16.04	15.517	1.226
12.14	15.205	15.05	1.206
12.148	15.399	15.13	1.166
12.155	15.473	15.437	1.235
12.162	14.308	14.363	1.131
12.169	14.473	14.472	1.206
12.176	15.358	15.129	1.157
12.183	15.63	18.223	1.194
12.19	15.453	14.924	1.182
12.198	15.993	15.063	1.17
12.205	15.857	15.289	1.137
12.212	16.47	15.539	1.205
12.219	16.985	15.468	1.17
12.226	15.933	15.329	1.117
12.233	18.448	15.315	1.174
12.24	17.366	15.139	1.138
12.248	18.143	16.253	1.172
12.255	18.974	16.792	1.112
12.262	17.308	14.884	1.13
12.269	18.073	16.026	1.159
12.276	18.535	15.419	1.172
12.283	18.892	16.952	1.236
12.291	19.79	16.136	1.273
12.298	19.66	16.621	1.212
12.305	18.79	15.551	1.186
12.312	18.862	16.05	1.153
12.319	19.14	15.681	1.19
12.326	19.031	15.688	1.15
12.333	19.963	15.893	1.36
12.341	18.567	14.959	1.184
12.348	18.964	15.99	1.217
12.355	18.169	15.161	1.129
12.362	18.604	16.33	1.271
12.369	17.919	14.771	1.154
12.376	18.134	15.502	1.201
12.383	17.186	14.771	1.172
12.391	16.958	14.4	1.177
12.398	17.195	15.179	1.147
12.405	17.158	15.325	1.223
12.412	16.116	15.04	1.154
12.419	16.318	14.993	1.179
12.426	16.58	15.491	1.183
12.434	15.844	14.671	1.096
12.441	15.82	14.731	1.174
12.448	16.203	15.224	1.161
12.455	15.387	14.994	1.177
12.462	15.965	15.324	1.178
12.469	15.591	15.643	1.203
12.476	15.642	15.54	1.187
12.484	14.805	15.117	1.226
12.491	14.696	14.666	1.171
12.498	14.769	15.587	1.161
12.505	14.218	14.588	1.163
12.512	14.572	14.894	1.167
12.519	14.556	15.11	1.197
12.526	14.314	15.177	1.184
12.534	14.806	15.572	1.151
12.541	16.187	14.824	1.164
12.548	14.595	15.029	1.279
12.555	14.867	15.823	1.239
12.562	14.639	16.134	1.206
12.569	14.502	15.135	1.242
12.577	14.271	14.588	1.148
12.584	14.621	15.219	1.231
12.591	15.909	15.096	1.259
12.598	14.97	14.884	1.249
12.605	14.605	17.582	1.171
12.612	15.496	15.579	1.247
12.619	15.462	14.897	1.201
12.627	14.701	15.533	1.199
12.634	14.69	14.904	1.19
12.641	14.952	15.073	1.159
12.648	15.171	15.277	1.181
12.655	16.156	15.726	1.208
12.662	14.491	14.977	1.162
12.669	15.206	15.722	1.223
12.677	14.671	14.514	1.16
12.684	15.436	15.184	1.186
12.691	14.664	14.939	1.153
12.698	15.553	16.848	1.191
12.705	15.017	15.099	1.181
12.712	15.317	16.065	1.229
12.72	15.577	15.742	1.226
12.727	14.854	15.551	1.169
12.734	14.63	14.814	1.19
12.741	15.595	15.037	1.248
12.748	15.468	16.63	1.232
12.755	15.382	14.781	1.171
12.762	15.737	15.902	1.291
12.77	15.905	16.063	1.231
12.777	16.088	16.474	1.268
12.784	15.07	15.156	1.21
12.791	15.532	15.947	1.256
12.798	16.531	16.926	1.288
12.805	15.601	15.771	1.278
12.812	15.615	15.711	1.26
12.82	15.284	15.985	1.296
12.827	15.05	15.515	1.236
12.834	15.969	15.339	1.286
12.841	15.223	16.106	1.291
12.848	14.592	17.106	1.219
12.855	14.81	14.965	1.181
12.863	15.254	14.806	1.21
12.87	15.507	14.996	1.272
12.877	14.953	16.306	1.276
12.884	14.248	14.722	1.216
12.891	14.154	14.893	1.241
12.898	14.693	16.132	1.282
12.905	14.828	15.321	1.299
12.913	14.644	14.75	1.299
12.92	14.321	15.14	1.259
12.927	14.675	15.061	1.265
12.934	14.021	15.439	1.315
12.941	14.103	15.07	1.268
12.948	14.04	15.374	1.289
12.955	13.666	15.351	1.207
12.963	14.421	15.616	1.235
12.97	14.005	15.92	1.259
12.977	13.295	14.655	1.242
12.984	12.984	14.429	1.214
12.991	13.024	14.771	1.235
12.998	13.517	16.185	1.291
13.006	12.824	14.69	1.209
13.013	13.084	14.907	1.225
13.02	13.011	14.745	1.215
13.027	12.751	14.676	1.241
13.034	12.834	15.595	1.25
13.041	13.008	14.786	1.242
13.048	12.973	15.298	1.27
13.056	13.014	14.612	1.395
13.063	13.081	14.877	1.236
13.07	12.565	14.24	1.206
13.077	13.444	15.099	1.313
13.084	13.397	15.48	1.34
13.091	13.212	15.161	1.278
13.098	13.133	15.067	1.254
13.106	13.297	15.147	1.28
13.113	13.351	15.619	1.282
13.12	13.754	15.95	1.468
13.127	13.824	15.431	1.292
13.134	14.055	15.768	1.297
13.141	13.753	15.571	1.292
13.149	13.762	15.056	1.262
13.156	14.336	15.56	1.316
13.163	13.776	15.356	1.298
13.17	14.077	15.407	1.303
13.177	14.403	15.358	1.304
13.184	13.799	15.257	1.263
13.191	13.802	14.812	1.221
13.199	14.272	15.857	1.308
13.206	14.743	16.53	1.345
13.213	14.771	15.756	1.285
13.22	14.369	16.809	1.272
13.227	15.855	16.136	1.286
13.234	15.685	16.533	1.273
13.241	14.53	15.788	1.281
13.249	14.6	16.317	1.28
13.256	14.677	16.171	1.305
13.263	14.382	15.932	1.294
13.27	14.691	16.442	1.354
13.277	15.51	16.228	1.273
13.284	14.647	16.253	1.255
13.292	14.119	15.99	1.233
13.299	13.673	15.313	1.227
13.306	14.377	16.117	1.245
13.313	14.248	15.713	1.31
13.32	14.676	16.507	1.243
13.327	14.871	17.402	1.291
13.334	14.266	15.657	1.245
13.342	14.732	15.943	1.238
13.349	14.907	16.087	1.332
13.356	14.726	15.74	1.317
13.363	14.455	16.139	1.423
13.37	14.638	17.06	1.255
13.377	14.97	16.008	1.223
13.384	15.525	16.198	1.257
13.392	15.874	17.509	1.226
13.399	15.138	16.257	1.294
13.406	14.35	15.342	1.245
13.413	14.774	16.652	1.274
13.42	14.499	16.125	1.272
13.427	14.019	15.484	1.221
13.435	14.785	14.918	1.225
13.442	14.903	15.968	1.357
13.449	14.503	15.827	1.235
13.456	14.42	15.576	1.256
13.463	14.773	16.234	1.273
13.47	15.557	16.186	1.267
13.477	14.452	15.954	1.225
13.485	14.283	15.447	1.26
13.492	14.729	16.136	1.258
13.499	15.225	15.445	1.262
13.506	14.816	15.591	1.267
13.513	14.197	15.156	1.248
13.52	14.56	16.528	1.263
13.527	14.721	15.376	1.197
13.535	14.895	15.773	1.237
13.542	14.535	15.106	1.251
13.549	15.138	15.69	1.254
13.556	14.442	14.929	1.273
13.563	14.865	15.839	1.262
13.57	14.931	15.631	1.236
13.578	15.304	15.198	1.255
13.585	16.004	15.245	1.258
13.592	15.242	15.811	1.222
13.599	16.171	15.624	1.302
13.606	15.893	15.189	1.278
13.613	16.718	15.481	1.296
13.62	17.156	15.343	1.265
13.628	16.497	15.593	1.273
13.635	16.613	15.57	1.294
13.642	17.144	16.145	1.278
13.649	16.916	15.483	1.317
13.656	17.286	16.369	1.304
13.663	17.74	15.482	1.285
13.67	17.923	15.665	1.315
13.678	16.954	15.588	1.304
13.685	17.817	17.237	1.337
13.692	17.017	14.623	1.273
13.699	17.564	15.18	1.315
13.706	17.576	15.218	1.288
13.713	17.822	14.941	1.326
13.721	18.296	15.449	1.306
13.728	18.47	15.267	1.326
13.735	18.72	15.375	1.321
13.742	18.432	15.183	1.309
13.749	18.949	15.592	1.415
13.756	18.674	14.789	1.326
13.763	18.861	14.909	1.318
13.771	19.064	14.776	1.337
13.778	19.065	15.412	1.323
13.785	19.543	14.97	1.311
13.792	20.048	14.851	1.272
13.799	21.635	15.633	1.294
13.806	22.802	15.693	1.266
13.813	24.35	16.47	1.278
13.821	25.904	17.373	1.355
13.828	24.013	16.977	1.293
13.835	23.63	16.64	1.308
13.842	21.718	15.894	1.304
13.849	22.047	15.696	1.265
13.856	22.07	15.621	1.272
13.864	21.303	16.065	1.249
13.871	21.808	14.933	1.263
13.878	21.4	15.12	1.245
13.885	21.333	14.594	1.242
13.892	21.799	14.884	1.299
13.899	22.122	14.62	1.283
13.906	21.929	14.363	1.214
13.914	21.631	14.2	1.246
13.921	22.042	14.275	1.255
13.928	22.085	14.234	1.267
13.935	21.854	14.69	1.256
13.942	22.012	14.119	1.234
13.949	22.364	14.278	1.24
13.956	22.278	13.949	1.237
13.964	22.988	13.832	1.252
13.971	22.06	13.709	1.201
13.978	23.748	14.423	1.263
13.985	21.384	13.071	1.152
13.992	23.406	14.263	1.256
13.999	21.595	12.986	1.158
14.007	24.346	13.259	1.24
14.014	22.386	13.882	1.287
14.021	23.61	13.311	1.217
14.028	22.599	12.94	1.168
14.035	24.012	13.268	1.255
14.042	24.932	13.011	1.207
14.049	22.895	12.644	1.165
14.057	24.032	12.898	1.203
14.064	23.668	12.424	1.165
14.071	24.286	12.894	1.182
14.078	25.513	12.64	1.221
14.085	24.861	12.544	1.239
14.092	25.562	12.537	1.202
14.099	25.87	12.237	1.227
14.107	25.465	11.951	1.183
14.114	26.601	12.055	1.182
14.121	27.367	12.526	1.236
14.128	27.693	12.44	1.234
14.135	27.1	11.892	1.208
14.142	27.324	11.855	1.209
14.149	27.302	11.199	1.177
14.157	27.425	11.7	1.223
14.164	27.435	11.353	1.182
14.171	26.631	11	1.183
14.178	27.857	11.484	1.253
14.185	28.772	11.926	1.228
14.192	27.73	11.076	1.215
14.2	26.508	11.124	1.241
14.207	27.828	11.35	1.256
14.214	28.665	11.421	1.255
14.221	27.495	11.314	1.248
14.228	30.593	10.811	1.196
14.235	25.744	10.508	1.187
14.242	27.164	11.122	1.21
14.25	27.199	10.999	1.221
14.257	27.396	10.804	1.215
14.264	25.84	10.556	1.212
14.271	26.833	10.969	1.273
14.278	25.93	10.567	1.169
14.285	26.78	10.889	1.221
[truncated: 686 more rows]

## Sheet: 14R
Distance from commissure [mm]	Mg/Ca [mmol/mol]	Na/Ca [mmol/mol]	Sr/Ca [mmol/mol]
2e-05	24.635	10.907	1.259
0.007	24.721	10.105	1.29
0.014	24.395	10.215	1.247
0.021	24.597	10.986	1.271
0.029	25.287	10.845	1.295
0.036	25.32	10.937	1.269
0.043	25.732	11.354	1.305
0.05	25.262	11.872	1.288
0.057	25.629	11.766	1.295
0.064	24.661	11.842	1.264
0.072	25.596	11.858	1.27
0.079	25.06	12.416	1.28
0.086	24.867	12.15	1.26
0.093	24.201	12.169	1.243
0.1	23.841	12.11	1.226
0.107	23.495	12.445	1.231
0.114	24.036	13.16	1.243
0.122	23.041	12.775	1.231
0.129	23.167	12.741	1.233
0.136	21.982	12.567	1.215
0.143	22.478	12.84	1.231
0.15	21.25	13.011	1.175
0.157	22.199	13.007	1.239
0.164	21.871	13.114	1.201
0.172	22.148	13.851	1.218
0.179	21.401	13.578	1.223
0.186	20.971	13.437	1.205
0.193	21.116	13.543	1.22
0.2	20.832	14.218	1.229
0.207	20.394	14.319	1.202
0.215	20.013	13.725	1.201
0.222	20.008	14.624	1.21
0.229	19.341	14.555	1.209
0.236	19.188	14.541	1.203
0.243	18.606	15.246	1.198
0.25	17.88	15.318	1.176
0.257	17.896	15.288	1.182
0.265	16.643	15.929	1.165
0.272	16.773	15.877	1.16
0.279	16.01	16.875	1.154
0.286	15.888	16.836	1.159
0.293	14.615	17.047	1.124
0.3	14.684	17.229	1.138
0.307	13.744	17.149	1.1
0.315	13.972	17.224	1.1
0.322	13.256	16.8	1.123
0.329	13.255	16.729	1.125
0.336	12.68	16.372	1.078
0.343	12.124	16.819	1.08
0.35	12.264	16.705	1.082
0.358	12.351	16.937	1.089
0.365	12.439	16.543	1.09
0.372	12.767	17.443	1.121
0.379	11.937	16.25	1.096
0.386	12.051	17.122	1.092
0.393	11.915	16.706	1.091
0.4	11.572	16.851	1.076
0.408	11.441	16.081	1.084
0.415	11.329	16.603	1.106
0.422	11.295	16.479	1.085
0.429	11.276	16.806	1.103
0.436	11.355	16.557	1.095
0.443	11.212	16.516	1.082
0.45	11.008	16.76	1.095
0.458	11.648	17.273	1.14
0.465	11.255	16.165	1.115
0.472	10.832	16.32	1.125
0.479	10.67	16.361	1.105
0.486	10.699	16.281	1.121
0.493	11.006	16.557	1.145
0.501	10.706	16.306	1.135
0.508	10.628	16.258	1.127
0.515	10.587	16.184	1.134
0.522	10.839	16.192	1.144
0.529	10.511	16.204	1.132
0.536	10.529	16.924	1.163
0.543	10.679	16.84	1.165
0.551	10.592	16.425	1.16
0.558	10.608	15.912	1.177
0.565	10.557	16.427	1.158
0.572	10.595	16.006	1.135
0.579	10.399	16.302	1.14
0.586	10.497	16.273	1.147
0.593	10.165	15.906	1.144
0.601	10.677	16.155	1.125
0.608	10.794	16.354	1.149
0.615	10.974	16.457	1.164
0.622	10.81	16.345	1.14
0.629	10.946	15.815	1.137
0.636	10.882	15.603	1.14
0.643	11.619	16.315	1.14
0.651	11.502	15.599	1.142
0.658	12.237	15.894	1.135
0.665	11.4	15.549	1.136
0.672	11.789	15.92	1.155
0.679	11.747	15.665	1.128
0.686	12.153	15.897	1.134
0.694	12.163	15.637	1.134
0.701	12.434	15.416	1.143
0.708	12.487	15.32	1.168
0.715	12.3	15.35	1.138
0.722	12.78	15.32	1.148
0.729	12.334	14.57	1.128
0.736	12.557	14.942	1.127
0.744	12.751	14.562	1.137
0.751	12.686	14.802	1.109
0.758	12.251	13.925	1.114
0.765	12.482	14.467	1.138
0.772	12.61	14.448	1.149
0.779	12.684	13.959	1.137
0.786	12.856	14.095	1.154
0.794	12.515	14.268	1.114
0.801	12.692	13.697	1.141
0.808	12.952	13.924	1.14
0.815	13.671	13.776	1.12
0.822	14.048	13.061	1.157
0.829	14.37	13.458	1.157
0.837	14.74	13.126	1.142
0.844	15.345	13.059	1.13
0.851	16.854	13.358	1.215
0.858	16.587	12.586	1.194
0.865	17.662	12.483	1.197
0.872	18.735	12.487	1.195
0.879	19.422	12.379	1.23
0.887	20.922	12.688	1.26
0.894	21.252	12.288	1.241
0.901	22.435	11.911	1.265
0.908	22.509	11.486	1.279
0.915	24.176	11.772	1.327
0.922	24.848	11.422	1.325
0.93	25.518	11.457	1.341
0.937	26.065	11.406	1.348
0.944	26.845	11.308	1.333
0.951	27.257	11.481	1.326
0.958	27.294	11.376	1.359
0.965	27.915	11.542	1.341
0.972	27.853	11.213	1.328
0.98	27.621	11.305	1.363
0.987	27.849	11.239	1.339
0.994	29.208	11.494	1.363
1.001	28.938	11.584	1.367
1.008	29.05	11.994	1.354
1.015	28.546	11.965	1.34
1.022	27.327	11.814	1.339
1.03	27.935	12.078	1.327
1.037	26.14	12.253	1.332
1.044	26.869	13.007	1.34
1.051	26.55	13.157	1.351
1.058	25.838	12.771	1.262
1.065	24.731	12.997	1.264
1.072	24.08	13.131	1.259
1.08	24.26	13.414	1.231
1.087	22.901	13.789	1.253
1.094	21.995	13.727	1.227
1.101	22.335	14.12	1.219
1.108	22.303	14.135	1.223
1.115	21.904	14.227	1.23
1.123	21.044	14.556	1.207
1.13	20.409	14.319	1.17
1.137	20.059	14.815	1.169
1.144	20.181	14.728	1.199
1.151	20.022	14.807	1.176
1.158	19.892	15.388	1.193
1.165	19.321	15.076	1.187
1.173	19.233	14.761	1.167
1.18	18.779	14.769	1.161
1.187	18.777	14.972	1.171
1.194	18.41	15.443	1.171
1.201	18.567	15.445	1.175
1.208	17.325	15.042	1.149
1.215	17.298	15.463	1.155
1.223	17.18	15.486	1.154
1.23	17.11	15.814	1.168
1.237	16.287	15.715	1.15
1.244	16.39	16.101	1.135
1.251	16.603	16.136	1.147
1.258	16.175	16.311	1.155
1.266	15.765	16.232	1.162
1.273	15.406	16.323	1.169
1.28	15.054	16.444	1.164
1.287	14.918	16.081	1.143
1.294	13.91	16.527	1.117
1.301	15.255	16.865	1.149
1.308	14.142	16.594	1.143
1.316	13.998	16.37	1.125
1.323	14.2	16.539	1.126
1.33	14.1	17.556	1.149
1.337	14.238	17.233	1.162
1.344	13.86	17.24	1.152
1.351	13.589	17.233	1.124
1.358	14.03	17.512	1.145
1.366	13.561	17.41	1.152
1.373	13.461	17.89	1.157
1.38	12.792	17.281	1.118
1.387	12.798	17.69	1.14
1.394	12.969	18.291	1.137
1.401	12.574	17.974	1.123
1.409	12.251	18.568	1.144
1.416	12.548	18.636	1.149
1.423	11.999	18.769	1.111
1.43	12.149	18.751	1.173
1.437	11.7	19.095	1.136
1.444	12.069	18.896	1.154
1.451	11.877	18.806	1.142
1.459	12.141	20.05	1.179
1.466	11.523	18.878	1.128
1.473	11.309	19.244	1.134
1.48	11.309	19.301	1.133
1.487	11.851	20.098	1.154
1.494	11.48	19.626	1.137
1.501	11.201	19.56	1.14
1.509	10.749	19.311	1.13
1.516	11.016	19.394	1.14
1.523	11.032	20.095	1.14
1.53	11.081	20.169	1.127
1.537	10.766	20.977	1.134
1.544	10.607	19.792	1.143
1.552	10.884	20.674	1.143
1.559	11.111	20.357	1.154
1.566	11.027	20.602	1.162
1.573	10.59	20.425	1.145
1.58	10.828	19.975	1.139
1.587	10.712	20.46	1.146
1.594	10.511	20.373	1.14
1.602	10.773	19.939	1.148
1.609	10.894	20.83	1.182
1.616	10.835	20.566	1.163
1.623	10.903	20.767	1.16
1.63	10.767	21.466	1.147
1.637	10.416	20.655	1.159
1.644	10.71	20.81	1.157
1.652	10.747	20.044	1.152
1.659	10.667	20.729	1.155
1.666	10.41	20.656	1.154
1.673	10.466	20.88	1.139
1.68	10.579	20.427	1.152
1.687	10.607	20.261	1.145
1.695	10.483	21.388	1.13
1.702	10.491	20.614	1.126
1.709	10.452	20.658	1.116
1.716	10.481	20.649	1.155
1.723	10.536	20.158	1.165
1.73	10.387	19.904	1.177
1.737	10.572	20.408	1.144
1.745	10.259	20.306	1.149
1.752	10.486	20.3	1.144
1.759	10.225	20.003	1.153
1.766	10.429	20.158	1.119
1.773	10.481	20.13	1.157
1.78	10.378	19.805	1.129
1.787	10.431	20.519	1.136
1.795	10.378	19.823	1.142
1.802	10.52	20.298	1.143
1.809	10.494	20.038	1.15
1.816	10.509	20.321	1.128
1.823	10.229	19.979	1.119
1.83	10.333	19.818	1.131
1.838	10.389	20.276	1.132
1.845	10.156	19.501	1.131
1.852	10.195	19.63	1.127
1.859	10.504	20.588	1.144
1.866	10.257	20.727	1.138
1.873	10.475	19.93	1.139
1.88	10.426	19.897	1.148
1.888	10.406	20.091	1.134
1.895	10.168	19.93	1.12
1.902	10.257	20.243	1.152
1.909	10.361	20.488	1.124
1.916	10.546	19.969	1.146
1.923	10.117	19.444	1.124
1.93	10.588	20.016	1.15
1.938	10.376	19.477	1.133
1.945	10.499	20.33	1.144
1.952	10.136	19.758	1.125
1.959	10.329	20.117	1.141
1.966	10.107	19.647	1.15
1.973	10.382	20.766	1.165
1.981	10.289	19.447	1.158
1.988	10.248	19.446	1.137
1.995	10.131	19.192	1.157
2.002	10.487	19.985	1.154
2.009	10.262	19.41	1.131
2.016	10.425	19.52	1.135
2.023	10.178	19.817	1.171
2.031	9.856	19.227	1.116
2.038	10.367	19.458	1.161
2.045	10.324	19.772	1.163
2.052	10.224	19.132	1.154
2.059	10.495	19.774	1.152
2.066	10.208	18.871	1.151
2.073	10.034	18.683	1.127
2.081	9.862	19.58	1.144
2.088	10.452	18.754	1.166
2.095	10.061	18.517	1.111
2.102	10.04	18.759	1.157
2.109	10.378	18.931	1.154
2.116	9.812	18.483	1.142
2.124	9.95	19.061	1.151
2.131	10.118	18.256	1.154
2.138	10.039	18.619	1.147
2.145	10.577	19.316	1.169
2.152	10.189	18.28	1.128
2.159	9.93	18.457	1.142
2.166	10.008	18.428	1.142
2.174	9.987	18.504	1.134
2.181	9.804	18.136	1.134
2.188	9.613	17.709	1.109
2.195	9.675	17.971	1.113
2.202	10.116	18.34	1.144
2.209	10.164	18.505	1.126
2.216	9.969	17.869	1.121
2.224	10.127	18.521	1.146
2.231	10.078	17.989	1.144
2.238	10.109	18.153	1.128
2.245	10.097	18.538	1.147
2.252	10.1	18.978	1.137
2.259	10.244	18.45	1.142
2.267	9.915	17.871	1.133
2.274	10.164	17.878	1.105
2.281	10.52	17.976	1.122
2.288	10.124	18.157	1.125
2.295	10.235	18.278	1.104
2.302	10.561	17.967	1.137
2.309	10.419	17.601	1.091
2.317	10.316	18.038	1.096
2.324	10.612	18.018	1.119
2.331	10.574	18.191	1.125
2.338	10.62	17.76	1.126
2.345	10.282	17.101	1.125
2.352	10.564	17.121	1.149
2.359	10.667	17.239	1.122
2.367	10.928	17.352	1.153
2.374	10.872	17.159	1.17
2.381	10.565	17.303	1.136
2.388	10.752	16.65	1.117
2.395	10.541	16.589	1.099
2.402	11.098	17.109	1.149
2.41	10.748	16.682	1.142
2.417	10.753	17.337	1.138
2.424	11.1	17.251	1.144
2.431	10.869	16.642	1.133
2.438	10.892	17.057	1.122
2.445	11.326	16.967	1.166
2.452	10.949	16.168	1.149
2.46	10.975	16.509	1.143
2.467	11.563	16.943	1.144
2.474	11.278	16.828	1.132
2.481	11.284	16.595	1.145
2.488	10.966	16.769	1.151
2.495	11.187	16.78	1.164
2.502	11.019	16.227	1.128
2.51	11.599	16.426	1.154
2.517	11.425	16.96	1.169
2.524	11.311	16.237	1.127
2.531	11.588	16.111	1.171
2.538	11.569	16.263	1.163
2.545	11.384	15.974	1.15
2.553	11.594	15.972	1.15
2.56	11.641	15.661	1.126
2.567	11.71	15.377	1.147
2.574	11.562	15.829	1.146
2.581	11.943	15.829	1.165
2.588	11.843	16.272	1.155
2.595	11.732	15.783	1.154
2.603	12.201	15.75	1.156
2.61	11.735	15.628	1.136
2.617	11.832	15.394	1.121
2.624	12.273	15.9	1.131
2.631	12.604	15.562	1.161
2.638	12.029	15.436	1.119
2.645	12.47	15.381	1.15
2.653	12.573	15.06	1.143
2.66	12.085	14.94	1.136
2.667	12.472	14.895	1.157
2.674	12.524	15.128	1.169
2.681	12.536	15.002	1.15
2.688	12.537	15.306	1.159
2.696	12.693	15.01	1.135
2.703	12.71	14.935	1.152
2.71	12.664	14.572	1.157
2.717	12.539	15.142	1.163
2.724	12.375	14.6	1.168
2.731	12.909	14.791	1.147
2.738	12.841	14.516	1.162
2.746	12.308	14.537	1.142
2.753	12.641	14.631	1.176
2.76	12.132	14.245	1.127
2.767	12.602	14.494	1.163
2.774	12.646	14.497	1.156
2.781	12.688	14.635	1.171
2.788	12.763	15.224	1.178
2.796	12.244	14.181	1.158
2.803	11.994	14.282	1.171
2.81	12.141	14.217	1.176
2.817	12.054	14.01	1.197
2.824	12.364	14.104	1.181
2.831	12.318	13.734	1.18
2.838	12.753	13.856	1.191
2.846	12.321	14.404	1.184
2.853	12.069	13.516	1.16
2.86	12.199	13.693	1.205
2.867	11.872	13.524	1.14
2.874	11.924	13.596	1.213
2.881	11.868	13.941	1.162
2.889	11.997	14.052	1.125
2.896	12.169	13.171	1.151
2.903	12.082	13.916	1.196
2.91	12.019	14.445	1.149
2.917	11.96	13.769	1.175
2.924	11.412	13.365	1.115
2.931	12.558	14.144	1.174
2.939	11.581	13.387	1.157
2.946	12.182	13.297	1.15
2.953	12.016	14.106	1.157
2.96	11.915	15.051	1.168
2.967	12.432	14.41	1.152
2.974	11.943	13.986	1.149
2.981	12.055	14.098	1.158
2.989	11.613	14.239	1.134
2.996	12.261	14.961	1.173
3.003	12.265	14.147	1.134
3.01	12.703	14.262	1.181
3.017	12.529	14.639	1.128
3.024	12.884	14.52	1.15
3.032	12.627	14.185	1.199
3.039	12.515	14.324	1.122
3.046	12.902	13.975	1.146
3.053	12.954	15.106	1.137
3.06	12.917	14.307	1.176
3.067	12.75	14.549	1.157
3.074	13.046	15.213	1.152
3.082	13.94	14.114	1.232
3.089	12.788	13.314	1.133
3.096	13.249	13.518	1.119
3.103	11.83	13.483	1.056
3.11	12.722	13.454	1.213
3.117	12.079	12.945	1.048
3.124	13.176	13.034	1.112
3.132	12.499	13.205	1.089
3.139	13.453	13.711	1.192
3.146	13.406	12.944	1.087
3.153	13.637	13.644	1.143
3.16	12.398	12.085	1.037
3.167	14.022	12.962	1.132
3.175	13.902	13.04	1.13
3.182	13.678	12.115	1.056
3.189	14.038	12.17	1.093
3.196	14.375	12.509	1.127
3.203	14.223	12.21	1.173
3.21	14.138	11.872	1.131
3.217	14.813	12.346	1.136
3.225	17.059	11.015	1.066
3.232	16.303	11.994	1.139
3.239	15.5	11.535	1.128
3.246	16.624	11.679	1.074
3.253	16.784	11.502	1.213
3.26	16.16	11.499	1.117
3.267	16.543	10.688	1.097
3.275	16.747	11.29	1.105
3.282	17.281	11.076	1.189
3.289	17.058	9.97	1.053
3.296	16.987	9.985	1.086
3.303	19.887	11.753	1.142
3.31	20.718	11.564	1.145
3.318	18.382	10.554	1.128
3.325	20.955	10.086	1.251
3.332	21.101	10.606	1.245
3.339	19.242	9.557	1.072
3.346	21.419	10.441	1.253
3.353	20.529	11.408	1.267
3.36	21.436	10.054	1.253
3.368	21.277	11.075	1.305
3.375	22.188	11.25	1.135
3.382	20.514	9.915	1.16
3.389	22.055	10.458	1.201
3.396	19.979	11.797	1.124
3.403	22.189	10.452	1.269
3.41	20.156	11.121	1.208
3.418	20.147	9.982	1.152
3.425	21.79	10.494	1.173
3.432	18.693	10.634	1.187
3.439	20.704	9.97	1.079
3.446	20.59	10.764	1.178
3.453	20.029	10.694	1.131
3.461	19.359	10.374	1.132
3.468	20.917	11.303	1.194
3.475	21.202	11.574	1.165
3.482	21.194	11.576	1.319
3.489	18.9	10.601	1.097
3.496	20.489	11.136	1.183
3.503	23.138	10.846	1.159
3.511	20.43	10.476	1.159
3.518	20.543	10.584	1.136
3.525	21.115	10.815	1.087
3.532	21.21	10.099	1.201
3.539	20.272	10.008	1.151
3.546	23.647	11.124	1.202
3.553	21.927	10.918	1.127
3.561	27.415	9.676	1.056
3.568	21.699	10.088	1.196
3.575	21.269	10.044	1.055
3.582	19.597	9.461	1.112
3.589	21.858	11.402	1.097
3.596	21.177	8.941	1.133
3.604	24.682	9.597	1.177
3.611	22.306	9.895	1.143
3.618	21.598	9.216	1.198
3.625	22.059	9.86	1.222
3.632	23.702	9.782	1.241
3.639	21.256	8.917	1.119
3.646	24.151	9.634	1.193
3.654	21.384	9.222	1.159
3.661	20.893	9.619	1.086
3.668	21.915	8.725	1.053
3.675	23.662	9.823	1.198
3.682	21.662	9.059	1.156
3.689	19.512	8.499	1.146
3.696	20.16	9.424	1.171
3.704	19.742	8.694	1.141
3.711	20.919	9.836	1.162
3.718	22.573	10.601	1.269
3.725	20.749	10.311	1.177
3.732	20.32	10.513	1.177
3.739	19.845	9.58	1.209
3.747	18.88	10.382	1.099
3.754	18.338	9.553	1.156
3.761	20.081	11.416	1.183
3.768	18.844	10.482	1.19
3.775	18.002	9.362	1.072
3.782	16.57	10.012	1.099
3.789	18.513	10.852	1.188
3.797	19.714	10.566	1.137
3.804	19.029	9.94	1.13
3.811	16.947	10.404	1.179
3.818	17.287	10.073	1.062
3.825	18.234	10.18	1.058
3.832	17.887	10.953	1.065
3.839	17.685	10.682	1.136
3.847	18.261	10.824	1.089
3.854	18.553	10.322	1.123
3.861	18.842	10.354	1.178
3.868	20.734	10.555	1.134
3.875	19.199	10.183	1.179
3.882	20.704	10.959	1.17
3.89	21.451	10.181	1.152
3.897	22.953	9.971	1.198
3.904	22.322	10.05	1.27
3.911	22.704	9.769	1.218
3.918	25.508	10.386	1.217
3.925	24.742	10.033	1.275
3.932	23.045	10.207	1.21
3.94	26.882	10.102	1.35
3.947	26.12	9.323	1.211
3.954	28.055	10.364	1.303
3.961	25.707	8.926	1.238
3.968	27.38	10.995	1.243
3.975	29.481	10.062	1.338
3.982	26.909	8.913	1.261
3.99	29.662	9.272	1.309
3.997	28.701	8.692	1.279
4.004	30.359	9.335	1.311
4.011	28.329	9.044	1.262
4.018	30.564	9.727	1.381
4.025	30.836	8.962	1.351
4.033	30.727	9.079	1.341
4.04	30.233	9.02	1.341
4.047	30.196	9.077	1.342
4.054	29.209	10.049	1.326
4.061	29.345	9.618	1.421
4.068	30.746	9.257	1.319
4.075	28.252	9.023	1.27
4.083	28.209	9.372	1.313
4.09	30.049	10.249	1.384
4.097	28.336	9.825	1.342
4.104	28.442	9.536	1.4
4.111	26.843	9.722	1.43
4.118	28.099	9.648	1.279
4.125	25.439	9.915	1.301
4.133	26.945	9.873	1.302
4.14	25.155	9.574	1.377
4.147	24.372	9.691	1.262
4.154	24.494	9.886	1.365
4.161	24.963	10.24	1.346
4.168	22.555	10.119	1.257
4.176	22.764	11.202	1.233
4.183	21.466	10.27	1.277
4.19	21.54	12.274	1.272
4.197	22.125	10.641	1.263
4.204	19.361	10.596	1.218
4.211	18.943	10.896	1.218
4.218	18.157	10.856	1.236
4.226	20.296	10.712	1.223
4.233	18.384	11.908	1.301
4.24	16.657	12.481	1.194
4.247	15.927	11.426	1.168
4.254	16.167	11.075	1.143
4.261	15.269	11.628	1.193
4.268	14.838	10.908	1.148
4.276	14.977	11.949	1.239
4.283	13.689	11.723	1.154
4.29	15.322	11.4	1.2
4.297	13.771	11.704	1.239
4.304	13.135	11.47	1.178
4.311	13.573	12.382	1.2
4.319	13.629	12.829	1.168
4.326	13.005	12.135	1.211
4.333	11.99	11.825	1.151
4.34	12.373	12.106	1.181
4.347	12.08	12.967	1.223
4.354	12.001	12.791	1.174
4.361	11.576	12.537	1.101
4.369	12.356	13.047	1.139
4.376	12.589	13.034	1.206
4.383	10.868	12.605	1.125
4.39	11.617	13.015	1.187
4.397	11.658	13.379	1.128
4.404	10.887	13.643	1.119
4.411	11.513	13.644	1.16
4.419	10.071	12.156	1.112
4.426	10.49	12.514	1.138
4.433	11.488	13.222	1.153
4.44	10.944	13.467	1.255
4.447	12.023	13.237	1.178
4.454	11.467	13.024	1.087
4.462	10.549	12.431	1.104
4.469	10.747	12.716	1.155
4.476	10.342	13.331	1.129
4.483	11.235	12.916	1.275
4.49	10.719	13.321	1.182
4.497	10.781	13.796	1.124
4.504	11.34	12.999	1.193
4.512	10.527	12.9	1.13
4.519	10.192	12.285	1.158
4.526	10.68	12.876	1.161
4.533	10.691	14.245	1.179
4.54	10.195	12.506	1.134
4.547	11.236	13.52	1.234
4.554	10.707	13.922	1.162
4.562	10.97	12.834	1.229
4.569	10.349	12.774	1.099
4.576	10.887	14.971	1.145
4.583	11.485	14.23	1.153
4.59	10.43	14.19	1.116
4.597	10.509	12.771	1.12
4.605	11.148	13.827	1.219
4.612	10.006	12.803	1.097
4.619	11.52	13.929	1.132
4.626	11.05	14.86	1.08
4.633	11.047	14.182	1.092
4.64	10.976	13.391	1.102
4.647	11.242	13.616	1.137
4.655	11.91	14.023	1.167
4.662	11.722	13.397	1.073
4.669	11.12	13.912	1.049
4.676	12.182	13.393	1.079
4.683	10.705	12.33	1.073
4.69	11.683	14.073	1.111
4.697	12.391	13.272	1.109
4.705	11.582	13.458	1.076
4.712	11.863	12.794	1.104
4.719	12.611	13.872	1.161
4.726	11.975	13.607	1.084
4.733	12.105	12.901	1.161
4.74	12.445	14.45	1.208
4.748	12.983	14.664	1.144
4.755	13.197	13.652	1.19
4.762	11.176	12.911	1.053
4.769	13.316	14.38	1.193
4.776	11.032	13.084	1.106
4.783	11.151	12.3	1.036
4.79	12.408	12.81	1.145
4.798	13.091	13.146	1.137
4.805	12.039	13.256	1.281
4.812	11.877	14.652	1.103
4.819	12.922	15.379	1.131
4.826	11.402	11.532	1.071
4.833	13.178	13.123	1.145
4.84	12.061	12.611	1.141
4.848	13.317	13.146	1.145
4.855	12.257	13.426	1.16
4.862	12.455	12.508	1.201
4.869	13.044	14.317	1.205
4.876	12.423	13.803	1.097
4.883	12.147	13.928	1.133
4.891	12.846	12.725	1.088
4.898	12.675	12.548	1.103
4.905	12.541	13.334	1.126
4.912	13.308	13.043	1.146
4.919	11.964	12.756	1.118
4.926	12.364	13.798	1.182
4.933	12.577	15.082	1.171
4.941	12.164	12.633	1.093
4.948	11.87	13.455	1.165
4.955	12.761	14.145	1.128
4.962	11.976	12.621	1.087
4.969	12.985	13.748	1.116
4.976	12.699	13.956	1.123
4.983	13.193	14.901	1.243
4.991	12.699	14.473	1.259
4.998	13.134	13.585	1.117
5.005	13.923	13.827	1.171
5.012	13.289	14.052	1.21
5.019	13.222	13.263	1.217
5.026	15.269	14.68	1.147
5.033	12.989	13.933	1.153
5.041	13.584	13.931	1.128
5.048	13.843	13.67	1.207
5.055	12.551	13.935	1.047
5.062	13.587	14.371	1.18
5.069	13.029	13.013	1.144
5.076	15.225	14.732	1.254
5.084	14.374	14.255	1.19
5.091	13.497	13.902	1.152
5.098	13.554	13.8	1.169
5.105	12.81	13.9	1.143
5.112	14.939	15.705	1.293
5.119	12.787	16.069	1.203
5.126	14.084	14.022	1.178
5.134	13.243	14.356	1.304
5.141	13.437	14.216	1.441
5.148	11.765	12.577	1.1
5.155	13.968	14.182	1.269
5.162	13.464	14.124	1.205
5.169	14.394	14.189	1.255
5.176	13.701	13.769	1.178
5.184	12.894	13.792	1.238
5.191	12.361	13.222	1.12
5.198	13.131	13.768	1.228
5.205	13.206	15.094	1.359
5.212	13.265	14.522	1.205
5.219	12.079	13.62	1.12
5.227	12.222	14.444	1.32
5.234	12.286	14.044	1.181
5.241	12.451	14.137	1.386
5.248	12.179	13.442	1.177
5.255	11.561	14.107	1.111
5.262	10.345	12.481	1.03
5.269	12.202	15.323	1.191
5.277	13.412	14.787	1.219
5.284	12.457	14.577	1.262
5.291	12.364	14.695	1.406
5.298	11.77	14.317	1.176
5.305	11.464	14.653	1.168
5.312	13.368	14.827	1.196
5.319	11.729	12.931	1.245
5.327	11.795	15.036	1.216
5.334	12.164	14.416	1.154
5.341	11.802	14.462	1.2
5.348	11.381	14.044	1.187
5.355	11.323	13.361	1.192
5.362	11.642	14.726	1.32
5.37	11.853	15.359	1.149
5.377	11.788	14.552	1.292
5.384	10.93	13.284	1.113
5.391	12.289	14.742	1.204
5.398	12.213	13.708	1.198
5.405	10.872	13.904	1.138
5.412	12.439	14.463	1.201
5.42	11.374	15.807	1.276
5.427	12.595	15.013	1.237
5.434	11.622	14.032	1.182
5.441	11.265	13.406	1.184
5.448	11.097	13.185	1.17
5.455	11.03	13.775	1.216
5.462	12.377	14.031	1.169
5.47	11.813	15.416	1.206
5.477	10.718	12.789	1.15
5.484	11.442	13.542	1.191
5.491	12.832	14.124	1.184
5.498	11.323	14.42	1.148
5.505	11.314	14.486	1.132
5.513	10.905	13.896	1.184
5.52	10.947	14.073	1.227
5.527	11.102	13.742	1.237
5.534	10.021	12.95	1.134
5.541	10.738	14	1.169
5.548	8.77	11.88	1.024
5.555	11.556	14.444	1.269
5.563	11.344	15.06	1.222
5.57	11.873	14.153	1.227
5.577	11.615	13.665	1.184
5.584	11.081	14.3	1.22
5.591	11.408	14.303	1.257
5.598	11.203	14.066	1.229
5.605	11.297	14.037	1.204
5.613	11.781	15.508	1.304
5.62	11.682	15.621	1.258
5.627	12.818	14.726	1.281
5.634	10.589	13.805	1.171
5.641	11.085	13.013	1.176
5.648	12.166	13.688	1.236
5.656	11.179	13.798	1.254
5.663	11.869	15.66	1.289
5.67	11.882	14.286	1.268
5.677	11.406	14.536	1.334
5.684	10.962	13.89	1.3
5.691	11.509	13.562	1.228
5.698	11.892	14.38	1.259
5.706	11.907	14.141	1.292
5.713	11.489	16.43	1.343
5.72	12.591	14.668	1.299
5.727	11.907	15.662	1.453
5.734	11.801	13.715	1.221
5.741	11.481	14.379	1.384
5.748	11.691	16.011	1.248
5.756	11.926	14.481	1.331
5.763	11.616	15.111	1.203
5.77	11.853	15.896	1.447
5.777	10.894	13.976	1.24
5.784	10.356	14.461	1.316
5.791	10.123	14.535	1.278
5.799	10.721	13.892	1.353
5.806	12.193	14.596	1.325
5.813	11.197	14.263	1.292
5.82	11.099	15.279	1.302
5.827	11.977	14.202	1.32
5.834	11.164	13.451	1.173
5.841	11.599	14.892	1.315
5.849	10.588	13.577	1.4
5.856	11.477	14.419	1.258
5.863	10.555	14.458	1.246
5.87	11.247	14.362	1.37
5.877	11.707	15.021	1.268
5.884	11.298	14.52	1.35
5.891	11.697	14.862	1.433
5.899	12.796	15.259	1.278
5.906	11.86	14.25	1.358
5.913	11.688	14.595	1.186
5.92	12.45	14.086	1.288
5.927	10.616	12.307	1.182
5.934	11.795	14.525	1.228
5.942	12.35	14.591	1.271
5.949	11.851	13.754	1.236
5.956	11.77	15.023	1.269
5.963	12.748	13.684	1.29
5.97	11.82	13.411	1.241
5.977	12.048	14.01	1.361
5.984	12.324	14.221	1.275
5.992	11.685	14.62	1.175
5.999	11.755	14.73	1.276
6.006	12.33	15.127	1.353
6.013	11.762	13.682	1.267
6.02	12.293	13.978	1.394
6.027	12.813	13.871	1.366
6.034	12.322	13.993	1.261
6.042	12.43	14.184	1.284
6.049	12.087	13.896	1.281
6.056	12.04	14.12	1.287
6.063	12.309	13.462	1.351
6.07	12.275	14.753	1.346
6.077	12.721	13.516	1.329
6.085	12.261	13.435	1.316
6.092	11.548	12.776	1.246
6.099	11.315	12.514	1.16
6.106	12.851	14.723	1.38
6.113	12.201	13.642	1.256
6.12	13.355	13.622	1.365
6.127	11.397	11.911	1.088
6.135	12.344	12.934	1.18
6.142	12.46	13.011	1.223
6.149	13.588	13.455	1.256
6.156	12.637	15.328	1.244
6.163	13.227	12.801	1.263
6.17	13.534	14.045	1.339
6.177	13.097	14.467	1.257
6.185	12.04	13.194	1.148
6.192	13.238	13.154	1.254
6.199	13.745	14.419	1.243
6.206	13.353	12.873	1.218
6.213	14.951	13.677	1.325
6.22	14.09	13.755	1.295
6.228	13.871	13.757	1.195
6.235	14.468	13.234	1.323
6.242	14.595	13.266	1.225
6.249	15.307	13.05	1.299
6.256	15.836	13.58	1.309
6.263	15.299	13.356	1.283
6.27	14.66	12.655	1.219
6.278	16.366	13.155	1.238
6.285	15.924	13.325	1.245
6.292	16.072	12.821	1.244
6.299	15.485	11.972	1.232
6.306	15.657	12.467	1.155
6.313	17.066	12.256	1.241
6.32	18.863	12.84	1.246
6.328	18.601	13.23	1.198
6.335	17.559	12.101	1.215
6.342	18.644	12.529	1.197
6.349	18.383	11.837	1.206
6.356	19.761	12.99	1.262
6.363	19.5	12.354	1.256
6.371	20.192	11.962	1.296
6.378	19.686	12.258	1.199
6.385	19.208	11.244	1.19
6.392	19.599	11.531	1.239
6.399	20.032	11.195	1.197
6.406	21.039	12.338	1.314
6.413	19.935	12.444	1.292
6.421	20.343	11.65	1.313
6.428	20.004	11.625	1.254
6.435	19.392	12.142	1.291
6.442	20.073	11.409	1.276
6.449	20.966	12.179	1.387
6.456	20.341	11.59	1.385
6.463	20.336	11.803	1.34
6.471	20.369	12.318	1.259
6.478	20.452	11.772	1.353
6.485	20.499	11.765	1.317
6.492	21.119	12.664	1.303
6.499	21.593	12.216	1.339
6.506	20.226	13.152	1.309
6.514	19.845	12.474	1.433
6.521	21.361	13.644	1.353
6.528	20.184	13.023	1.295
6.535	19.807	12.911	1.358
6.542	20.559	13.06	1.327
6.549	20.309	13.243	1.431
6.556	19.524	13.428	1.295
6.564	20.422	13.527	1.294
6.571	20.193	13.387	1.317
6.578	19.891	13.071	1.306
6.585	19.698	13.25	1.353
6.592	20.158	12.936	1.269
6.599	20.013	13.117	1.302
6.606	18.963	12.298	1.28
6.614	20.175	13.1	1.274
6.621	20.577	13.265	1.232
6.628	19.798	12.982	1.272
6.635	19.376	13.028	1.26
6.642	19.495	13.55	1.277
6.649	18.81	12.45	1.211
6.656	19.381	12.678	1.235
6.664	20.071	13.157	1.276
6.671	19.569	12.441	1.256
6.678	19.62	12.795	1.244
6.685	19.456	12.57	1.254
6.692	19.705	12.619	1.261
6.699	19.853	12.566	1.266
6.707	20.08	12.096	1.257
6.714	20.861	12.494	1.322
6.721	21.551	12.706	1.303
6.728	21.732	11.673	1.302
6.735	23.26	11.827	1.388
6.742	23.887	12.157	1.426
6.749	24.801	11.992	1.391
6.757	24.77	11.304	1.356
6.764	26.042	11.617	1.39
6.771	27.301	11.3	1.45
6.778	28.162	11.446	1.421
6.785	28.244	11.417	1.465
6.792	29.406	11.167	1.467
6.8	29.085	11.108	1.461
6.807	29.469	11.144	1.484
6.814	28.941	10.555	1.457
6.821	29.59	10.948	1.497
6.828	30.828	11.117	1.512
6.835	30.126	10.739	1.492
6.842	29.757	10.748	1.484
6.85	29.327	10.729	1.487
6.857	30.481	10.778	1.464
6.864	29.837	10.865	1.509
6.871	29.66	10.711	1.474
6.878	29.311	11.079	1.532
6.885	27.632	10.869	1.466
6.892	27.294	10.822	1.416
6.9	28.504	11.098	1.473
6.907	27.165	11.273	1.46
6.914	26.606	11.536	1.44
6.921	24.633	10.797	1.412
6.928	25.038	11.263	1.418
6.935	23.775	11.886	1.376
6.943	24.389	11.635	1.429
6.95	22.959	11.718	1.385
6.957	24.045	12.175	1.426
6.964	23.23	11.828	1.425
6.971	23.605	11.731	1.393
6.978	23.132	11.861	1.399
6.985	23.444	12.097	1.435
6.993	23.815	11.649	1.441
7	24.387	12.152	1.427
7.007	25.53	11.876	1.478
7.014	25.131	11.999	1.486
7.021	25.796	11.747	1.453
7.028	25.257	11.785	1.468
7.035	25.617	11.848	1.462
7.043	27.193	12.022	1.51
7.05	25.705	11.769	1.467
7.057	26.301	11.73	1.449
7.064	25.643	11.802	1.459
7.071	25.943	11.599	1.451
7.078	25.562	11.661	1.447
7.085	24.896	11.744	1.445
7.093	25.378	11.971	1.435
7.1	24.697	11.874	1.434
7.107	23.409	12.025	1.353
7.114	23.255	11.848	1.38
7.121	23.208	12.247	1.411
7.128	22.48	12.077	1.359
7.136	21.553	12.281	1.343
7.143	21.45	12.622	1.352
7.15	20.207	12.607	1.309
7.157	19.457	13.208	1.289
7.164	19.22	12.851	1.268
7.171	19.05	13.823	1.267
7.178	18.429	13.563	1.274
7.186	16.761	13.823	1.194
7.193	17.094	13.631	1.216
7.2	16.433	13.659	1.163
7.207	15.769	13.797	1.176
7.214	15.398	13.898	1.225
7.221	15.157	13.771	1.181
7.228	14.799	13.629	1.178
7.236	14.585	13.781	1.179
7.243	15.045	13.646	1.262
7.25	15.325	14.353	1.236
7.257	14.551	13.923	1.209
7.264	16.105	14.796	1.216
7.271	15.734	14.196	1.188
7.279	16.177	14.285	1.235
7.286	18.312	14.297	1.248
7.293	16.596	14.065	1.221
7.3	17.191	14.062	1.188
7.307	17.81	15.037	1.233
7.314	17.381	14.506	1.227
7.321	16.957	14.368	1.233
7.329	17.244	15.386	1.226
7.336	17.679	14.733	1.273
7.343	17.973	14.436	1.281
7.35	17.603	14.645	1.228
7.357	18.286	15.26	1.264
7.364	18.71	14.718	1.255
7.371	17.631	14.124	1.218
7.379	18.847	15.775	1.275
7.386	17.341	15.117	1.208
7.393	17.408	14.379	1.221
7.4	17.797	15.469	1.243
7.407	17.246	14.83	1.228
7.414	17.281	14.389	1.173
7.422	16.848	15.496	1.158
7.429	17.222	14.794	1.218
7.436	17.11	14.999	1.186
7.443	16.552	14.864	1.152
7.45	15.875	15.05	1.119
7.457	16.174	15.43	1.165
7.464	15.591	15.3	1.18
7.472	15.444	14.556	1.132
7.479	15.417	14.982	1.125
7.486	15.1	15.086	1.114
7.493	14.816	15.046	1.119
7.5	14.374	14.762	1.104
7.507	14.53	14.703	1.087
7.514	14.445	14.468	1.094
7.522	13.719	14.297	1.082
7.529	13.554	14.572	1.077
7.536	12.862	14.101	1.088
7.543	13.136	14.731	1.081
7.55	13.488	14.677	1.148
7.557	12.949	14.271	1.084
7.565	12.565	14.022	1.058
7.572	12.185	14.212	1.054
7.579	11.876	13.871	1.033
7.586	12.134	13.735	1.051
7.593	11.48	13.643	1.047
7.6	11.934	13.661	1.056
7.607	11.977	14.171	1.048
7.615	11.694	13.532	1.043
7.622	13.273	14.259	1.06
7.629	11.9	13.88	1.04
7.636	11.616	13.84	1.052
7.643	11.75	14.694	1.105
7.65	11.514	13.847	1.088
7.657	11.757	13.74	1.069
7.665	12.38	13.828	1.074
7.672	11.515	13.398	1.023
7.679	12.152	14.211	1.052
7.686	11.798	14.176	1.048
7.693	12.063	13.999	1.055
7.7	11.437	13.65	1.038
7.708	12.062	14.215	1.055
7.715	11.459	14.095	1.042
7.722	12.112	14.301	1.071
7.729	11.235	13.483	1.016
7.736	12.088	14.257	1.065
7.743	12.347	15.054	1.122
7.75	11.426	13.121	1.03
7.758	11.807	14.257	1.111
7.765	11.317	13.455	1.046
7.772	12.314	14.445	1.076
7.779	11.899	13.823	1.08
7.786	11.976	14.066	1.032
7.793	11.972	13.956	1.083
7.8	11.673	13.682	1.09
7.808	11.304	12.908	1.037
7.815	12.036	13.609	1.102
7.822	11.938	15.937	1.039
7.829	12.038	14.473	1.084
7.836	11.9	14.09	1.07
7.843	11.87	13.67	1.139
7.851	11.546	13.799	1.108
7.858	12.067	14.187	1.104
7.865	12.602	14.324	1.088
7.872	11.998	14.072	1.062
7.879	11.644	14.676	1.076
7.886	12.15	14.556	1.106
7.893	11.519	14.165	1.13
7.901	11.757	14.676	1.146
7.908	12.415	14.527	1.073
7.915	11.232	14.105	1.078
7.922	11.665	14.78	1.079
7.929	11.526	15.233	1.085
7.936	11.713	15.433	1.095
7.943	11.513	14.649	1.105
7.951	11.546	14.345	1.083
7.958	11.57	14.558	1.131
7.965	11.596	15.531	1.11
7.972	11.585	14.965	1.086
7.979	12.166	15.443	1.123
7.986	11.563	14.72	1.165
7.994	11.535	15.232	1.094
8.001	11.172	14.539	1.054
8.008	11.707	15.283	1.12
8.015	10.95	14.421	1.064
8.022	11.656	15.251	1.104
8.029	11.867	15.02	1.066
8.036	11.611	16.085	1.132
8.044	11.461	15.629	1.136
8.051	11.287	15.543	1.127
8.058	11.562	15.808	1.066
8.065	11.877	16.328	1.104
8.072	11.744	15.918	1.122
8.079	11.402	15.653	1.082
8.086	11.419	15.984	1.123
8.094	11.467	15.295	1.132
8.101	11.172	15.245	1.124
8.108	11.886	14.532	1.052
8.115	11.025	16.05	1.1
8.122	10.896	14.9	1.074
8.129	11.406	15.966	1.085
8.137	11.214	15.789	1.123
8.144	10.985	15.515	1.101
8.151	11.673	16.222	1.123
8.158	10.947	15.511	1.073
8.165	11.022	16.035	1.084
8.172	11.296	15.664	1.112
8.179	11.291	15.726	1.128
8.187	11.723	16.551	1.143
8.194	11.173	16.188	1.131
8.201	10.995	15.274	1.125
8.208	11.066	15.904	1.118
8.215	11.637	15.934	1.099
8.222	10.63	14.997	1.077
8.229	11.295	16.644	1.167
8.237	11.106	16.315	1.091
8.244	11.316	15.892	1.115
8.251	11.102	15.189	1.071
8.258	10.847	14.966	1.076
8.265	10.534	15.756	1.1
8.272	10.941	15.145	1.112
8.28	10.965	15.034	1.078
8.287	10.99	14.894	1.053
8.294	11.274	15.956	1.079
8.301	11.384	15.392	1.076
8.308	10.714	15.956	1.076
8.315	10.791	14.912	1.083
8.322	11.338	15.652	1.098
8.33	10.347	14.961	1.032
8.337	10.886	14.824	1.076
8.344	11.561	15.529	1.132
8.351	10.532	14.688	1.062
8.358	10.555	15.15	1.112
8.365	10.755	14.663	1.064
8.372	11.152	14.681	1.056
8.38	12.095	15.284	1.133
8.387	12.162	14.76	1.072
8.394	11.369	14.307	1.059
8.401	11.272	15.231	1.117
8.408	11.302	15.181	1.12
8.415	11.425	15.786	1.088
8.423	11.393	15.664	1.087
8.43	11.016	15.625	1.093
8.437	10.786	15.261	1.067
8.444	11.012	14.667	1.06
8.451	11.254	14.56	1.088
8.458	11.087	14.38	1.039
8.465	10.668	14.802	1.053
8.473	11.225	14.22	1.06
8.48	11.05	13.878	1.076
8.487	11.47	15.606	1.091
8.494	10.87	14.728	1.061
8.501	10.735	14.307	1.072
8.508	11.305	13.643	1.071
8.515	11.389	13.916	1.085
8.523	11.445	14.557	1.164
8.53	11.197	13.483	1.078
8.537	11.791	14.326	1.198
8.544	10.966	13.208	1.088
8.551	11.452	13.32	1.156
8.558	11.375	13.419	1.081
8.566	11.628	13.144	1.137
8.573	11.6	13.485	1.128
8.58	12.239	13.991	1.155
8.587	11.604	13.769	1.119
8.594	11.984	12.901	1.085
8.601	11.438	13.352	1.217
8.608	12.606	13.303	1.179
8.616	12.305	12.979	1.131
8.623	12.112	13.434	1.106
8.63	12.466	13.189	1.119
8.637	12.4	13.547	1.152
8.644	11.604	12.133	1.142
8.651	13.104	13.939	1.135
8.658	12.922	12.929	1.108
8.666	13.122	13.06	1.156
8.673	12.644	12.568	1.115
8.68	13.096	14.258	1.162
8.687	12.889	14.075	1.175
8.694	13.845	13.475	1.193
8.701	12.459	13.678	1.152
8.708	13.299	13.466	1.112
8.716	13.335	13.27	1.116
8.723	11.592	12.42	1.111
8.73	12.629	12.624	1.116
8.737	12.987	14.388	1.134
8.744	12.664	14.113	1.144
8.751	12.757	13.949	1.081
8.759	13.355	15.32	1.058
8.766	11.12	13.032	1.085
8.773	13.624	13.828	1.031
8.78	12.485	14.081	1.164
8.787	11.926	11.743	0.979
8.794	12.317	13.074	1.088
8.801	12.574	12.114	1.064
8.809	12.587	13.275	1.048
8.816	13.265	13.494	1.044
8.823	13.616	12.325	1.068
8.83	12.934	12.205	1.043
8.837	12.577	12.657	1.075
8.844	12.896	12.727	1.046
8.851	12.439	12.018	1.053
8.859	12.583	12.133	1.092
8.866	12.276	11.386	1.007
8.873	12.649	11.799	1.006
8.88	12.623	12.412	1.057
8.887	13.062	11.04	1.049
8.894	14.013	11.728	1.118
8.902	12.604	11.541	1.05
8.909	14.766	11.831	1.089
8.916	13.403	11.243	1.095
8.923	13.127	11.32	1.113
8.93	14.475	11.844	1.158
8.937	14.241	11.989	1.098
8.944	13.147	10.854	1.108
8.952	12.652	11.463	1.159
8.959	13.271	12.256	1.124
8.966	13.833	11.343	1.094
8.973	14.083	12.025	1.235
8.98	13.265	11.206	1.176
8.987	12.527	11.124	1.067
8.995	13.019	10.802	1.116
9.002	13.745	11.842	1.175
9.009	12.733	10.905	1.175
9.016	13.408	12.781	1.284
9.023	13.505	11.85	1.212
9.03	12.925	11.229	1.285
9.037	13.997	11.61	1.139
9.045	13.545	13.232	1.255
9.052	12.533	12.739	1.139
9.059	11.934	10.619	1.039
9.066	13.125	12.111	1.188
9.073	12.651	11.052	1.13
9.08	12.09	11.201	1.081
9.087	13.14	12.29	1.215
9.095	14.166	12.122	1.218
9.102	13.042	14.981	1.17
9.109	14.69	11.812	1.179
9.116	13.735	14.221	1.188
9.123	13.65	15.536	1.177
9.13	14.707	12.744	1.262
9.137	14.664	13.533	1.224
9.145	15.359	12.68	1.209
9.152	15.512	12.57	1.201
9.159	13.209	11.151	1.13
9.166	15.868	12.129	1.367
9.173	16.415	13.553	1.208
9.18	16.233	11.969	1.182
9.188	17.33	12.771	1.131
9.195	15.064	12.171	1.174
9.202	16.487	12.703	1.297
9.209	15.572	12.437	1.22
9.216	14.696	13.148	1.13
9.223	17.637	12.833	1.251
9.23	15.533	12.922	1.085
9.238	18.105	12.548	1.188
9.245	17.7	13.708	1.219
9.252	17.545	13.302	1.264
9.259	16.661	12.692	1.26
9.266	19.025	13.604	1.227
9.273	17.347	13.022	1.354
9.28	18.833	13.277	1.236
9.288	17.164	12.758	1.191
9.295	16.062	11.466	1.194
9.302	18.065	12.567	1.277
9.309	16.251	11.592	1.16
9.316	17.803	14.886	1.294
9.323	17.587	12.747	1.217
9.331	16.772	12.699	1.196
9.338	17.503	12.834	1.248
9.345	16.604	12.686	1.157
9.352	18.267	12.524	1.253
9.359	16.74	12.784	1.291
9.366	16.668	12.447	1.205
9.373	16.202	11.792	1.249
9.381	16.212	12.338	1.277
9.388	15.882	11.899	1.216
9.395	17.309	13.334	1.332
9.402	16.738	13.053	1.331
9.409	16.724	12.791	1.198
9.416	16.631	12.183	1.327
9.423	18.355	12.85	1.219
9.431	16.097	11.842	1.196
9.438	18.153	12.625	1.367
9.445	18.057	12.581	1.405
9.452	17.733	14.669	1.227
9.459	17.907	12.741	1.221
9.466	18.067	12.036	1.207
9.474	18.82	12.568	1.26
9.481	19.529	12.851	1.278
9.488	20.951	11.55	1.163
9.495	21.259	12.783	1.304
9.502	21.11	12.647	1.328
9.509	21.691	12.981	1.283
9.516	24.901	13.902	1.426
9.524	25.854	12.46	1.242
9.531	22.66	12.222	1.26
9.538	22.503	12.761	1.194
9.545	23.042	13.224	1.384
9.552	25.331	14.806	1.312
9.559	27.893	13.56	1.321
9.566	26.37	13.413	1.339
9.574	25.766	13.842	1.307
9.581	25.067	12.653	1.35
9.588	25.151	12.458	1.266
9.595	24.379	13.682	1.27
9.602	25.617	13.102	1.366
9.609	27.378	13.839	1.359
9.617	29.939	12.925	1.405
9.624	27.682	13.032	1.411
9.631	30.101	14.201	1.434
9.638	28.803	13.554	1.433
9.645	30.026	13.571	1.48
9.652	30.503	13.448	1.37
9.659	30.437	13.561	1.445
9.667	33.755	14.397	1.487
9.674	32.506	13.825	1.416
9.681	29.339	13.326	1.392
9.688	33.092	14.624	1.478
9.695	31.171	13.191	1.391
9.702	28.799	11.702	1.361
9.709	35.569	15.325	1.465
9.717	32.693	15.802	1.35
9.724	32.669	12.394	1.46
9.731	34.967	13.403	1.468
9.738	35.951	13.329	1.421
9.745	38.332	13.604	1.455
9.752	34.874	12.667	1.42
9.76	40.21	13.885	1.448
9.767	35.376	12.789	1.399
9.774	36.114	12.812	1.43
9.781	36.841	12.963	1.407
9.788	35.192	12.157	1.326
9.795	33.095	12.142	1.264
9.802	33.889	11.167	1.439
9.81	36.09	13.854	1.425
9.817	35.122	12.109	1.481
9.824	34.134	11.477	1.39
9.831	34.335	10.776	1.338
9.838	31.992	11.364	1.406
9.845	32.926	11.593	1.351
9.852	32.461	10.85	1.393
9.86	28.963	9.809	1.235
9.867	29.579	9.553	1.296
9.874	29.872	10.205	1.363
9.881	31.816	10.516	1.38
9.888	31.187	10.469	1.348
9.895	30.113	10.227	1.307
9.903	29.583	9.425	1.286
9.91	31.3	10.697	1.448
9.917	32.452	11.315	1.361
9.924	28.953	9.678	1.274
9.931	30.491	11.265	1.356
9.938	31.503	10.907	1.238
9.945	33.404	10.723	1.314
9.953	27.625	9.816	1.254
9.96	31.048	11.199	1.39
9.967	31.817	11.016	1.403
9.974	31.287	10.749	1.316
9.981	30.507	10.584	1.336
9.988	27.244	9.628	1.236
9.995	32.564	10.744	1.343
10.003	28.423	11.071	1.278
10.01	32.515	12.129	1.314
10.017	32.02	11.029	1.303
10.024	27.74	10.537	1.26
10.031	30.428	11.69	1.357
10.038	28.37	11.1	1.373
10.046	30.295	10.951	1.303
10.053	28.53	11.21	1.275
10.06	27.315	10.677	1.305
10.067	27.545	10.582	1.291
10.074	27.275	10.889	1.297
10.081	28.494	10.996	1.311
10.088	27.578	11.879	1.371
10.096	25.873	9.754	1.232
10.103	27.745	11.752	1.361
10.11	26.149	10.894	1.312
10.117	25.562	10.672	1.347
10.124	27.26	10.63	1.238
10.131	24.025	9.828	1.174
10.138	25.628	10.895	1.224
10.146	27.557	12.875	1.305
10.153	24.876	11.714	1.268
10.16	24.488	10.543	1.295
10.167	24.102	11.205	1.38
10.174	23.521	10.638	1.242
10.181	23.577	12.203	1.278
10.189	24.634	11.258	1.326
10.196	24.199	10.879	1.27
10.203	22.166	11.39	1.306
10.21	21.173	11.012	1.215
10.217	24.487	11.554	1.252
10.224	21.414	11.771	1.338
10.231	21.417	11.184	1.224
10.239	19.85	12.062	1.202
10.246	20.371	12.508	1.263
10.253	21.271	12.521	1.254
10.26	19.211	11.243	1.194
10.267	18.586	11.518	1.134
10.274	18.665	11.715	1.241
10.281	19.571	12.466	1.184
10.289	17.117	11.306	1.174
10.296	17.763	11.561	1.184
10.303	19.559	11.901	1.285
10.31	18.046	12.464	1.233
10.317	16.986	12.213	1.277
10.324	16.988	12.635	1.213
10.332	16.271	11.978	1.302
10.339	18.577	12.488	1.255
10.346	16.562	13.082	1.264
10.353	15.459	12.336	1.267
10.36	16.446	12.226	1.222
10.367	14.45	12.359	1.219
10.374	15.14	12.781	1.271
10.382	14.662	12.735	1.238
10.389	14.337	12.622	1.205
10.396	14.65	12.5	1.314
10.403	14.019	13.432	1.41
10.41	13.499	12.278	1.155
10.417	13.756	12.32	1.351
10.424	13.165	12.335	1.313
10.432	13.14	12.343	1.259
10.439	12.033	11.733	1.133
10.446	12.275	12.537	1.244
10.453	12.692	12.972	1.228
10.46	13.321	13.561	1.242
10.467	12.874	13.249	1.275
10.475	12.557	12.801	1.233
10.482	12.888	12.665	1.189
10.489	12.03	12.931	1.144
10.496	13.057	12.096	1.309
10.503	13.259	12.474	1.21
10.51	12.95	13.553	1.197
10.517	14.459	12.838	1.22
10.525	13.85	12.627	1.319
10.532	12.636	12.974	1.134
10.539	13.26	13.604	1.209
10.546	14.244	12.234	1.152
10.553	13.97	13.208	1.198
10.56	14.012	11.663	1.15
10.567	16.271	12.71	1.302
10.575	15.393	12.463	1.186
10.582	16.703	12.445	1.199
10.589	15.66	11.592	1.16
10.596	16.736	11.919	1.121
10.603	16.918	12.747	1.199
10.61	18.49	12.504	1.207
10.618	17.507	11.991	1.141
10.625	16.567	10.22	1.2
10.632	17.753	10.272	1.1
10.639	18.829	11.712	1.189
10.646	19.621	12.293	1.194
10.653	19.479	10.836	1.196
10.66	19.91	10.791	1.227
10.668	21.599	11.616	1.231
10.675	20.977	11.56	1.163
10.682	20.118	10.79	1.209
10.689	21.136	11.041	1.176
10.696	20.822	11.183	1.195
10.703	22.498	11.183	1.216
10.71	20.493	10.163	1.208
10.718	21.86	10.784	1.162
10.725	20.609	9.74	1.11
10.732	21.333	9.666	1.131
10.739	21.575	11.462	1.24
10.746	21.632	14.382	1.208
10.753	22.348	10.302	1.185
10.761	21.347	11.181	1.247
10.768	20.129	9.683	1.108
10.775	20.218	11.748	1.176
10.782	21.683	11.871	1.178
10.789	18.896	9.629	1.124
10.796	21.411	11.414	1.2
10.803	18.048	10.591	1.097
10.811	19.963	11.214	1.222
10.818	19.852	11.27	1.152
10.825	20.778	11.831	1.256
10.832	19.085	11.461	1.183
10.839	19.155	11.082	1.188
10.846	19.328	12.835	1.215
10.853	18.989	12.163	1.321
10.861	18.827	11.136	1.174
10.868	20.218	12.222	1.283
10.875	19.819	11.837	1.276
10.882	18.388	11.26	1.23
10.889	18.957	11.255	1.331
10.896	18.296	13.062	1.296
10.903	18.39	11.916	1.29
10.911	18.42	12.949	1.282
10.918	18.772	13.131	1.296
10.925	18.62	12.109	1.394
10.932	17.895	12.327	1.41
10.939	20.215	12.59	1.346
10.946	16.983	11.86	1.228
10.954	18.446	12.668	1.337
10.961	18.217	13.209	1.361
10.968	17.564	12.995	1.342
10.975	16.215	12.167	1.318
10.982	17.826	13.379	1.406
10.989	17.66	13.303	1.438
10.996	17.663	13.726	1.427
11.004	17.436	13.638	1.483
11.011	17.407	14.408	1.396
11.018	16.386	14.677	1.432
11.025	17.063	14.392	1.471
11.032	15.937	13.872	1.54
11.039	16.423	14.518	1.383
11.046	16.003	13.509	1.377
11.054	16.407	13.632	1.473
11.061	16.492	14.401	1.471
11.068	16.152	13.323	1.434
11.075	18.168	14.204	1.472
11.082	15.835	12.754	1.393
11.089	18.897	13.789	1.432
11.097	15.38	12.716	1.288
11.104	17.139	13.912	1.581
11.111	16.17	14.395	1.505
11.118	14.558	13.306	1.358
11.125	15.415	13.511	1.344
11.132	15.683	12.124	1.387
11.139	17.082	12.633	1.369
11.147	14.413	11.8	1.254
11.154	17.27	13.154	1.38
11.161	16.824	11.513	1.347
11.168	17.96	12.236	1.382
11.175	17.545	11.89	1.388
11.182	17.12	11.012	1.303
11.189	17.311	11.365	1.323
11.197	19.865	10.809	1.368
11.204	20.325	10.579	1.288
11.211	22.416	11.952	1.533
11.218	20.19	12.279	1.318
11.225	21.014	11.239	1.406
11.232	22.446	10.693	1.231
11.24	21.082	9.879	1.291
11.247	22.151	10.02	1.316
11.254	21.149	9.5	1.177
11.261	25.086	10.419	1.282
11.268	22.187	9.422	1.19
11.275	23.335	9.318	1.231
11.282	22.358	8.94	1.176
11.29	23.782	10.142	1.395
11.297	25.69	9.524	1.322
11.304	25.739	10.687	1.259
11.311	24.818	8.984	1.294
11.318	24.501	9.277	1.208
11.325	23.316	8.423	1.2
11.332	26.102	9.258	1.318
11.34	26.621	8.997	1.316
11.347	27.995	9.242	1.344
11.354	27.307	10.208	1.28
11.361	31.379	8.951	1.345
11.368	28.319	8.985	1.248
11.375	28.188	8.573	1.269
11.383	30.505	8.528	1.327
11.39	28.975	8.494	1.329
11.397	29.103	8.635	1.375
11.404	29.598	8.294	1.222
11.411	30.426	8.356	1.335
11.418	32.933	8.694	1.379
11.425	31.636	8.037	1.336
11.433	34.001	8.787	1.363
11.44	30.276	8.038	1.232
11.447	32.606	8.52	1.37
11.454	33.353	8.373	1.397
11.461	32.675	8.174	1.385
11.468	30.763	7.44	1.244
11.475	30.727	8.232	1.349
11.483	33.522	8.639	1.482
11.49	31.91	8.649	1.398
11.497	31.684	8.109	1.378
11.504	32.864	8.997	1.364
11.511	30.722	8.343	1.379
11.518	33.497	8.429	1.364
11.526	29.478	9.586	1.418
11.533	27.581	8.398	1.282
11.54	28.597	8.148	1.281
11.547	29.769	8.715	1.246
11.554	26.635	8.689	1.312
11.561	31.585	8.78	1.338
11.568	22.351	7.666	1.072
11.576	24.947	8.687	1.245
11.583	22.992	8.401	1.16
11.59	24.169	9.147	1.138
11.597	23.704	9.591	1.193
11.604	21.663	8.891	1.146
11.611	21.079	10.462	1.111
11.618	21.217	9.562	1.187
11.626	21.628	10.186	1.179
11.633	20.392	10.931	1.166
11.64	19.451	10.593	1.134
11.647	19.147	10.097	1.181
11.654	17.786	9.666	1.107
11.661	20.838	10.076	1.15
11.669	18.204	10.578	1.132
11.676	17.898	10.878	1.162
11.683	16.316	9.974	1.057
11.69	16.076	10.358	1.115
11.697	15.915	11.078	1.087
11.704	15.506	10.809	1.053
11.711	15.57	10.784	1.084
11.719	15.92	10.842	1.095
11.726	14.831	11.198	1.058
11.733	16.215	11.158	1.102
11.74	14.043	11.082	1.067
11.747	14.543	11.582	1.095
11.754	14.379	11.034	1.094
11.761	14.354	11.243	1.049
11.769	13.738	11.732	1.081
11.776	13.853	12.099	1.185
11.783	13.682	13.292	1.092
11.79	13.826	12.509	1.151
11.797	14.667	13.226	1.164
11.804	13.301	12.551	1.1
11.812	14.163	12.761	1.174
11.819	12.741	11.858	1.027
11.826	14.1	14.88	1.148
11.833	13.274	13.09	1.187
11.84	12.546	12.951	1.132
11.847	12.743	12.273	1.089
11.854	12.322	12.63	1.084
11.862	12.097	12.321	1.117
11.869	12.194	12.686	1.069
11.876	12.508	12.667	1.051
11.883	12.078	12.827	1.077
11.89	12.546	13.229	1.049
11.897	12.274	12.239	1.114
11.904	13.24	12.426	1.05
11.912	13.087	14.153	1.142
11.919	13.713	12.916	1.068
11.926	12.531	12.973	1.093
11.933	12.512	12.874	1.073
11.94	13.43	13.043	1.069
11.947	12.754	12.871	1.027
11.955	12.826	13.191	1.142
11.962	12.668	13.279	1.184
11.969	12.714	12.631	1.044
11.976	12.883	11.24	0.951
11.983	11.815	12.721	1.088
11.99	13.72	12.316	1.104
11.997	12.363	12.584	1.042
12.005	13.064	12.806	1.07
12.012	14.084	12.691	1.109
12.019	11.74	11.622	0.954
12.026	13.416	12.648	1.142
12.033	12.927	12.761	1.118
12.04	12.592	12.981	1.07
12.047	12.988	12.325	1.156
12.055	12.928	13.464	1.145
12.062	12.691	12.532	1.134
12.069	12.744	13.576	1.086
12.076	12.311	12.098	1.096
12.083	12.625	13.843	1.161
12.09	11.686	12.557	1.07
12.098	13.03	13.411	1.159
12.105	12.364	12.112	1.116
12.112	12.517	12.564	1.162
12.119	14.485	12.838	1.16
12.126	11.76	12.442	1.079
12.133	12.288	12.033	1.206
12.14	11.643	11.386	1.036
12.148	12.728	13.31	1.181
12.155	12.95	13.904	1.154
12.162	11.51	11.603	1.162
12.169	13.121	13.769	1.121
12.176	13.375	13.044	1.179
12.183	12.734	12.739	1.098
12.19	13.729	13.188	1.262
12.198	12.27	11.883	1.162
12.205	12.696	12.934	1.235
12.212	12.968	13.176	1.152
12.219	12.515	11.675	1.06
12.226	11.868	11.962	1.145
12.233	13.175	12.463	1.081
12.241	12.745	13.274	1.137
12.248	12.963	11.931	1.156
12.255	12.77	12.259	1.11
12.262	12.141	12.04	1.059
12.269	13.758	12.931	1.208
12.276	12.832	12.499	1.085
12.283	13.184	12.156	1.158
12.291	12.175	12.19	1.173
12.298	13.05	11.523	1.336
12.305	11.387	10.744	1.2
12.312	13.936	12.089	1.214
12.319	13.179	12.016	1.147
12.326	12.776	12.833	1.17
12.333	12.596	11.585	1.123
12.341	12.215	12.093	1.247
12.348	12.268	11.851	1.164
12.355	12.418	10.983	1.035
12.362	12.537	12.726	1.144
12.369	13.209	12.063	1.218
12.376	13.515	12.963	1.179
12.384	12.458	12.111	1.201
12.391	12.124	12.103	1.128
12.398	13.003	12.239	1.169
12.405	12.782	12.284	1.124
12.412	11.643	11.073	1.066
12.419	12.192	12.828	1.177
12.426	11.72	12.388	1.173
12.434	14.233	13.179	1.222
12.441	11.617	11.925	1.076
12.448	12.466	14.449	1.179
12.455	11.579	11.66	1.121
12.462	12.287	13.796	1.132
12.469	12.712	12.96	1.167
12.476	12.723	13.777	1.097
12.484	12.67	13.215	1.258
12.491	12.007	13.51	1.294
12.498	12.004	14.038	1.254
12.505	12.125	12.265	1.153
12.512	10.996	11.739	1.134
12.519	12.132	12.881	1.242
12.527	11.752	12.05	1.115
12.534	12.306	14.052	1.141
12.541	12.467	12.904	1.27
12.548	12.333	12.469	1.183
12.555	11.825	12.189	1.125
12.562	12.765	13.541	1.172
12.569	12.957	12.984	1.189
12.577	13.918	13.217	1.247
12.584	13.03	12.178	1.198
12.591	12.691	13.461	1.227
12.598	12.435	11.4	1.076
12.605	12.09	11.782	1.178
12.612	12.765	13.687	1.225
12.619	13.46	12.506	1.179
12.627	12.632	13.691	1.222
12.634	12.603	12.742	1.117
12.641	11.297	11.197	1.09
12.648	12.297	12.214	1.083
12.655	12.901	12.491	1.227
12.662	13.948	13.414	1.371
12.67	14.072	12.44	1.255
12.677	13.045	12.711	1.194
12.684	12.787	12.061	1.226
12.691	13.681	12.323	1.272
12.698	11.928	11.834	1.152
12.705	13.682	11.717	1.2
12.712	15.308	13.248	1.263
12.72	13.541	11.493	1.22
12.727	13.622	11.896	1.172
12.734	14.275	12.393	1.21
12.741	14.18	11.742	1.277
12.748	14.992	12.969	1.281
12.755	15.502	12.913	1.337
12.762	14.599	11.654	1.137
12.77	14.71	13.454	1.238
12.777	14.042	12.122	1.218
12.784	13.744	10.887	1.141
12.791	14.774	12.975	1.272
12.798	15.737	12.681	1.235
12.805	15.986	12.674	1.3
12.813	17.528	12.356	1.221
12.82	16.17	11.467	1.25
12.827	16.766	12.754	1.214
12.834	14.796	10.554	1.08
12.841	16.528	11.386	1.155
12.848	18.51	11.992	1.241
12.855	17.515	11.864	1.295
12.863	16.611	10.949	1.148
12.87	17.24	11.166	1.211
12.877	16.979	10.688	1.239
12.884	16.857	10.592	1.202
12.891	16.671	10.572	1.203
12.898	18.166	10.982	1.323
12.905	17.134	10.24	1.292
12.913	16.412	10.256	1.177
12.92	16.269	10.174	1.13
12.927	17.527	10.902	1.281
12.934	18.16	10.348	1.224
12.941	19.81	9.708	1.129
12.948	18.242	10.014	1.186
12.956	17.714	9.292	1.183
12.963	17.742	9.449	1.156
12.97	18.159	9.501	1.271
12.977	21.192	9.47	1.316
12.984	20.53	9.052	1.23
12.991	19.482	9.021	1.17
12.998	20.928	9.003	1.235
13.006	21.134	9.353	1.243
13.013	22.583	8.716	1.311
13.02	22.607	8.619	1.275
13.027	21.782	8.907	1.257
13.034	26.455	8.89	1.298
13.041	24.876	8.86	1.302
13.048	22.913	8.083	1.338
13.056	24.581	8.295	1.317
13.063	26.509	8.297	1.248
13.07	25.758	8.19	1.267
13.077	27.01	8.519	1.27
13.084	26.414	8.106	1.37
13.091	27.082	8.399	1.233
13.098	29.797	8.374	1.348
13.106	28.896	8.385	1.335
13.113	27.133	8.35	1.263
13.12	27.003	7.843	1.282
13.127	28.72	7.87	1.339
13.134	28.219	8.482	1.292
13.141	27.247	7.744	1.215
13.149	27.614	8.175	1.273
13.156	32.113	8.391	1.299
13.163	29.596	8.273	1.244
13.17	29.825	8.395	1.248
13.177	29.061	8.723	1.316
13.184	26.719	7.82	1.264
13.191	28.097	8.77	1.243
13.199	26.692	8.783	1.265
13.206	24.165	8.568	1.175
13.213	26.199	8.354	1.248
13.22	24.975	8.424	1.25
13.227	25.192	8.441	1.209
13.234	24.571	8.565	1.275
13.241	23.283	8.819	1.169
13.249	22.663	8.564	1.134
13.256	22.434	8.874	1.148
13.263	21.177	8.035	1.151
13.27	21.312	9.079	1.162
13.277	20.62	8.26	1.147
13.284	22.5	8.686	1.182
13.292	23.721	8.734	1.151
13.299	21.334	8.684	1.087
13.306	20.228	8.83	1.192
13.313	20.175	8.635	1.136
13.32	18.795	8.656	1.147
13.327	20.939	9.398	1.113
13.334	20.199	9.286	1.101
13.342	19.204	9.609	1.129
13.349	19.214	8.772	1.073
13.356	20.048	9.122	1.075
13.363	19.181	9.517	1.042
13.37	18.385	8.96	1.068
13.377	19.488	9.441	1.096
13.384	18.562	9.188	1.147
13.392	17.682	8.52	1.028
13.399	18.621	9.754	1.144
13.406	20.04	9.494	1.088
13.413	19.355	9.372	1.075
13.42	19.8	9.769	1.102
13.427	18.117	9.762	1.076
13.435	18.534	9.329	1.162
13.442	19.13	10.065	1.127
13.449	18.141	9.823	1.121
13.456	17.649	9.489	1.096
13.463	17.476	10.384	1.073
13.47	16.462	9.958	1.004
13.477	17.555	10.131	1.051
13.485	17.432	10.188	1.075
13.492	17.599	10.554	1.156
13.499	16.177	9.411	1.049
13.506	17.412	10.669	1.133
13.513	15.662	10.837	1.02
13.52	16.032	10.685	1.065
13.527	14.607	10.362	0.989
13.535	17.27	11.199	1.069
13.542	15.747	11.162	1.105
13.549	14.644	10.546	1.047
13.556	14.308	11.083	1.033
13.563	14.151	11.552	1.023
13.57	13.118	10.429	0.996
13.578	13.743	10.902	1.123
13.585	13.743	10.636	1.029
13.592	14.831	11.169	1.086
13.599	13.476	10.745	1.034
13.606	14.453	11.197	1.041
13.613	13.898	10.995	1.025
13.62	13.911	12.009	1.061
13.628	13.301	11.085	0.995
13.635	12.395	10.02	0.911
13.642	13.326	11.354	0.997
13.649	13.947	11.347	1.042
13.656	13.462	11.155	1.016
13.663	13.669	11.478	1.105
13.67	13.636	11.478	1.014
13.678	12.349	10.855	0.952
13.685	15.421	11.276	1.072
13.692	12.99	11.355	1.139
13.699	13.263	11.292	0.966
13.706	12.733	10.846	1.047
13.713	13.185	11.431	1.041
13.721	14.11	11.969	1.137
13.728	11.686	9.712	0.924
13.735	12.355	11.706	1.059
13.742	12.677	12.887	1.056
13.749	13.186	11.285	1.044
13.756	12.486	10.933	1.143
13.763	13.516	12.572	1.059
13.771	13.081	11.546	0.981
13.778	12.716	11.317	1.098
13.785	12.518	11.192	1.041
13.792	13.337	11.372	0.985
13.799	12.253	11.407	0.99
13.806	11.894	10.884	1.018
13.813	12.069	11.325	1.02
13.821	13.777	13.208	1.088
13.828	14.154	13.006	1.078
13.835	12.916	13.059	1.24
13.842	12.412	11.377	1.04
13.849	12.752	15.299	1.075
13.856	12.023	11.289	1.007
13.864	12.526	11.744	1.071
13.871	11.15	10.895	0.953
13.878	12.594	11.588	1.106
13.885	12.684	12.042	1.08
13.892	12.067	11.387	1.042
13.899	12.406	12.099	1.055
13.906	11.887	10.96	1.098
13.914	11.906	11.532	1.085
13.921	12.346	11.353	1.115
13.928	12.683	11.477	1.078
13.935	13.618	11.617	1.06
13.942	11.538	11.163	1.021
13.949	11.777	11.184	1.039
13.956	11.845	10.604	0.993
13.964	11.515	11.541	1.069
13.971	12.049	11.672	1.038
13.978	12.584	11.434	1.056
13.985	11.905	11.549	1.082
13.992	12.054	11.869	1.095
13.999	11.456	11.71	1.019
14.007	12.53	12.319	1.047
14.014	11.833	12.091	1.025
14.021	11.736	11.785	1.159
14.028	11.348	11.774	1.113
14.035	12.253	12.368	1.101
14.042	12.145	12.913	1.061
14.049	12.414	12.961	1.054
14.057	11.718	12.059	1.08
14.064	12.345	12.144	1.136
14.071	12.368	12.342	1.108
14.078	11.414	11.795	1.032
14.085	12.15	12.378	1.064
14.092	11.928	11.365	0.97
14.099	11.673	13.009	1.069
14.107	11.623	13.32	1.061
14.114	12.057	12.151	1.085
14.121	11.32	11.87	1.008
14.128	11.751	12.135	1.105
14.135	10.835	11.545	1.049
14.142	10.853	11.318	1.001
14.15	11.393	12.578	1.043
14.157	11.584	12.638	1.054
14.164	11.589	12.705	1.067
14.171	11.971	12.611	1.1
14.178	11.703	12.703	1.111
14.185	11.912	13.968	1.113
14.192	11.161	13.795	1.078
14.2	11.379	13.282	1.054
14.207	12.305	13.361	1.115
14.214	11.643	12.448	1.035
14.221	11.312	13.336	1.122
14.228	11.108	12.143	1.024
14.235	11.706	13.82	1.221
14.242	11.109	13.012	1.056
14.25	10.897	12.793	1.084
14.257	11.048	13.602	1.155
14.264	11.036	12.588	1.002
14.271	11.288	12.865	1.1
14.278	11.06	13.092	1.096
14.285	11.184	14.089	1.102
[truncated: 604 more rows]

## Sheet: 16R
Distance from commissure [mm]	Mg/Ca [mmol/mol]	Na/Ca [mmol/mol]	Sr/Ca [mmol/mol]
3.052e-10	19.96	15.947	1.233
0.007	20.939	16.165	1.323
0.014	20.841	16.003	1.305
0.021	22.691	16.363	1.277
0.029	24.075	15.875	1.251
0.036	23.467	16.768	1.265
0.043	20.333	16.243	1.267
0.05	21.209	15.882	1.312
0.057	20.907	16.645	1.297
0.064	21.599	15.895	1.224
0.071	20.872	16.39	1.254
0.079	20.046	15.666	1.271
0.086	21.945	15.306	1.223
0.093	19.972	14.479	1.169
0.1	21.075	15.974	1.227
0.107	21.372	15.156	1.274
0.114	19.896	14.6	1.174
0.122	19.614	14.548	1.201
0.129	20.541	15.192	1.21
0.136	20.079	16.318	1.263
0.143	22.498	16.45	1.256
0.15	22.439	16.082	1.229
0.157	25.002	15.902	1.479
0.164	19.994	17.378	1.171
0.172	26.606	15.301	1.204
0.179	20.671	15.359	1.267
0.186	23.072	14.564	1.208
0.193	23.152	15.369	1.238
0.2	23.208	14.657	1.33
0.207	22.277	13.959	1.153
0.214	24.852	14.522	1.24
0.222	25.351	14.712	1.225
0.229	23.349	13.668	1.195
0.236	25.985	13.16	1.298
0.243	21.548	11.81	1.125
0.25	26.263	13.569	1.365
0.257	24.103	12.679	1.266
0.265	26.785	12.345	1.289
0.272	24.128	12.086	1.183
0.279	30.17	14.191	1.376
0.286	28.753	11.7	1.237
0.293	28.985	11.558	1.303
0.3	29.465	11.627	1.445
0.307	27.587	10.5	1.281
0.315	28.241	11.665	1.448
0.322	29.163	10.522	1.41
0.329	31.192	11.559	1.38
0.336	30.654	12.349	1.329
0.343	29.927	11.964	1.442
0.35	29.791	13.56	1.378
0.357	27.752	13.893	1.308
0.365	28.654	11.813	1.419
0.372	29.079	11.628	1.309
0.379	30.267	12.402	1.416
0.386	29.525	11.171	1.339
0.393	29.736	11.328	1.317
0.4	30.085	11.859	1.324
0.408	31.637	11.479	1.34
0.415	30.242	11.92	1.359
0.422	33.167	11.909	1.506
0.429	31.447	11.708	1.388
0.436	32.256	12.009	1.427
0.443	30.304	11.642	1.339
0.45	30.486	12.217	1.368
0.458	31.022	11.171	1.376
0.465	32.08	11.697	1.471
0.472	32.223	12.707	1.456
0.479	32.088	12.278	1.477
0.486	33.433	12.34	1.466
0.493	31.807	11.246	1.356
0.5	30.944	11.178	1.392
0.508	32.629	11.997	1.457
0.515	31.695	12.177	1.424
0.522	33.031	13.092	1.503
0.529	31.589	12.211	1.453
0.536	31.329	13.557	1.496
0.543	30.51	12.762	1.442
0.551	32.198	13.771	1.462
0.558	30.591	12.965	1.423
0.565	31.52	13.731	1.471
0.572	29.847	13.575	1.361
0.579	30.066	14.307	1.441
0.586	29.143	14.104	1.386
0.593	29.545	16.455	1.443
0.601	27.385	13.997	1.334
0.608	27.707	15.15	1.544
0.615	29.456	15.989	1.4
0.622	27.345	15.7	1.488
0.629	29.549	16.726	1.375
0.636	25.959	17.004	1.368
0.643	27.756	17.144	1.503
0.651	26.924	17.581	1.373
0.658	36.024	17.499	1.381
0.665	25.981	18.835	1.365
0.672	24.887	18.3	1.391
0.679	23.547	17.495	1.347
0.686	23.275	17.669	1.293
0.694	23.611	17.697	1.294
0.701	25.003	19.343	1.429
0.708	23.25	17.962	1.356
0.715	21.496	17.798	1.351
0.722	23.972	17.772	1.287
0.729	24.304	19.303	1.449
0.736	20.975	17.833	1.267
0.744	29.557	21.477	1.315
0.751	21.712	19.11	1.29
0.758	22.67	19.567	1.353
0.765	19.751	18.65	1.433
0.772	21.021	22.016	1.28
0.779	21.367	20.468	1.294
0.786	20.343	19.784	1.348
0.794	19.771	20.17	1.273
0.801	20.9	20.329	1.313
0.808	20.072	20.665	1.306
0.815	18.828	20.01	1.25
0.822	19.477	20.976	1.324
0.829	19.369	20.357	1.304
0.837	19.418	21.182	1.283
0.844	18.509	20.215	1.279
0.851	18.749	20.261	1.262
0.858	19.772	20.704	1.309
0.865	17.499	19.973	1.213
0.872	18.487	20.237	1.249
0.879	18.047	20.341	1.29
0.887	18.264	20.129	1.227
0.894	18.358	20.13	1.278
0.901	18.778	20.985	1.285
0.908	18.449	20.67	1.314
0.915	18.112	20.986	1.267
0.922	18.012	20.087	1.231
0.929	16.964	19.397	1.223
0.937	17.788	21.544	1.25
0.944	16.839	19.027	1.168
0.951	17.937	20.789	1.23
0.958	17.723	20.176	1.245
0.965	16.63	19.557	1.188
0.972	17.972	20.487	1.226
0.98	17.587	20.102	1.323
0.987	18.274	19.436	1.173
0.994	17.32	19.731	1.224
1.001	19.598	20.485	1.279
1.008	17.639	20.661	1.204
1.015	17.556	20.096	1.235
1.022	17.113	20.498	1.231
1.03	16.485	22.385	1.215
1.037	18.699	20.781	1.243
1.044	18.499	20.779	1.317
1.051	18.36	22.338	1.288
1.058	17.207	21.317	1.261
1.065	17.624	20.274	1.26
1.072	17.933	20.88	1.398
1.08	17.558	19.982	1.232
1.087	17.969	20.14	1.259
1.094	18.452	20.209	1.305
1.101	16.912	18.83	1.185
1.108	18.554	19.626	1.323
1.115	17.783	19.988	1.228
1.123	17.87	21.301	1.282
1.13	18.789	19.659	1.288
1.137	18.098	19.051	1.262
1.144	18.044	18.995	1.257
1.151	18.642	19.585	1.282
1.158	18.256	19.772	1.263
1.165	18.735	19.589	1.283
1.173	18.249	19.096	1.284
1.18	18.805	19.356	1.295
1.187	18.945	19.662	1.257
1.194	18.94	19.202	1.296
1.201	18.246	19.543	1.292
1.208	18.78	19.593	1.307
1.215	18.639	18.853	1.284
1.223	19.197	19.133	1.294
1.23	19.104	19.045	1.331
1.237	19.189	19.424	1.421
1.244	18.101	18.72	1.247
1.251	18.51	19.64	1.287
1.258	18.456	19.259	1.294
1.266	19.086	19.407	1.317
1.273	19.276	20.046	1.314
1.28	19.509	20.266	1.259
1.287	19.131	19.695	1.362
1.294	18.424	18.888	1.283
1.301	18.188	19.077	1.262
1.308	18.036	19.002	1.291
1.316	19.231	19.589	1.348
1.323	18.644	19.277	1.294
1.33	18.991	19.033	1.263
1.337	19.172	19.592	1.304
1.344	18.552	19.479	1.281
1.351	19.059	19.492	1.382
1.358	19.012	19.944	1.298
1.366	18.655	19.452	1.288
1.373	17.673	18.6	1.259
1.38	18.57	19.458	1.286
1.387	18.443	19.167	1.301
1.394	18.423	19.221	1.255
1.401	18.912	19.688	1.299
1.409	17.993	19.014	1.253
1.416	18.586	19.579	1.253
1.423	18.131	19.523	1.28
1.43	18.543	19.7	1.338
1.437	18.245	20.925	1.285
1.444	18.146	19.304	1.261
1.451	17.311	19.235	1.228
1.459	17.552	19.098	1.207
1.466	18.914	20.274	1.322
1.473	18.663	20.525	1.294
1.48	17.587	19.512	1.239
1.487	18.058	21.273	1.347
1.494	17.952	20.771	1.25
1.501	18.187	20.195	1.231
1.509	18.928	20.516	1.281
1.516	18.738	19.991	1.312
1.523	17.852	20.651	1.246
1.53	18.151	19.86	1.284
1.537	18.138	19.856	1.316
1.544	18.393	19.772	1.269
1.552	18.738	18.757	1.232
1.559	18.009	19.331	1.261
1.566	18.394	19.958	1.243
1.573	18.435	19.216	1.249
1.58	18.89	19.917	1.276
1.587	18.051	19.349	1.247
1.594	18.467	20.149	1.304
1.602	17.639	19.07	1.226
1.609	17.603	19.077	1.273
1.616	18.949	19.361	1.252
1.623	18.534	19.212	1.297
1.63	18.356	19.596	1.263
1.637	17.62	18.822	1.33
1.644	18.013	20.155	1.242
1.652	18.875	19.438	1.238
1.659	17.565	19.836	1.249
1.666	17.654	20.082	1.235
1.673	19.263	19.652	1.211
1.68	18.186	19.799	1.263
1.687	16.507	19.036	1.205
1.695	16.775	19.232	1.246
1.702	16.829	19.947	1.237
1.709	16.675	18.932	1.215
1.716	17.194	19.94	1.223
1.723	18.64	19.794	1.261
1.73	16.4	19.625	1.209
1.737	15.681	18.54	1.126
1.745	16.383	18.628	1.195
1.752	16.726	20.194	1.194
1.759	15.855	19.785	1.197
1.766	15.147	19.502	1.119
1.773	15.739	19.183	1.169
1.78	15.476	19.737	1.192
1.787	16.795	20.459	1.233
1.795	15.943	19.559	1.229
1.802	16.767	19.461	1.162
1.809	14.73	18.688	1.127
1.816	13.567	17.551	1.047
1.823	14.07	17.837	1.084
1.83	14.449	18.908	1.092
1.838	16.172	19.155	1.196
1.845	14.294	17.813	1.1
1.852	16.902	18.374	1.2
1.859	14.355	17.681	1.095
1.866	15.077	18.975	1.19
1.873	14.123	18.03	1.158
1.88	14.186	18.916	1.24
1.888	14.854	19.438	1.184
1.895	14.592	18.992	1.155
1.902	14.49	18.816	1.241
1.909	14.84	21.111	1.26
1.916	13.387	17.854	1.175
1.923	14.254	18.489	1.126
1.93	14.263	19.078	1.171
1.938	15.482	19.517	1.222
1.945	13.691	18.642	1.151
1.952	14.475	18.508	1.179
1.959	14.243	18.613	1.166
1.966	12.528	17.395	1.092
1.973	13.97	18.666	1.185
1.98	13.907	19.856	1.291
1.988	12.429	18.184	1.086
1.995	12.81	19.015	1.114
2.002	13.011	18.857	1.111
2.009	13.298	18.188	1.165
2.016	13.307	18.056	1.131
2.023	13.7	18.81	1.189
2.031	13.133	17.804	1.124
2.038	13.512	18.897	1.141
2.045	13.914	16.994	1.08
2.052	12.135	17.318	1.082
2.059	12.349	17.457	1.058
2.066	13.2	18.134	1.144
2.073	14.329	19.055	1.187
2.081	13.184	16.915	1.034
2.088	13.27	18.372	1.211
2.095	13.37	17.357	1.07
2.102	13.198	17.841	1.104
2.109	12.577	17.213	1.124
2.116	12.908	18.89	1.144
2.123	11.11	16.201	1.01
2.131	13.141	17.932	1.265
2.138	13.008	18.056	1.172
2.145	12.685	17.442	1.11
2.152	13.577	18.659	1.143
2.159	13.514	18.608	1.133
2.166	13.033	18.13	1.103
2.174	12.953	17.63	1.15
2.181	13.969	18.829	1.095
2.188	12.887	17.49	1.115
2.195	13.219	17.628	1.08
2.202	14.565	17.551	1.155
2.209	13.797	18.534	1.149
2.216	13.27	17.573	1.193
2.224	12.932	18.891	1.118
2.231	13.669	17.752	1.116
2.238	12.847	17.407	1.086
2.245	13.473	17.852	1.088
2.252	13.752	17.651	1.141
2.259	13.416	18.992	1.14
2.266	13.504	17.078	1.11
2.274	13.242	17.545	1.15
2.281	12.553	16.597	1.151
2.288	14.236	17.477	1.206
2.295	14.531	17.452	1.223
2.302	13.535	17.276	1.11
2.309	13.636	17.828	1.119
2.317	13.384	16.931	1.1
2.324	12.995	17.581	1.111
2.331	14.581	17.603	1.129
2.338	13.866	17.797	1.109
2.345	13.754	17.029	1.182
2.352	13.445	17.555	1.083
2.359	13.546	17.765	1.123
2.367	12.94	17.914	1.185
2.374	13.391	17.139	1.113
2.381	13.994	18.708	1.081
2.388	13.115	17.522	1.187
2.395	13.622	17.737	1.135
2.402	12.196	17.312	1.056
2.409	12.518	16.655	1.095
2.417	12.877	16.776	1.066
2.424	13.121	17.245	1.156
2.431	13.051	16.839	1.112
2.438	12.672	16.615	1.172
2.445	13.08	16.324	1.098
2.452	13.974	16.019	1.183
2.46	13.371	16.263	1.141
2.467	13.709	16.602	1.199
2.474	13.425	16.504	1.173
2.481	13.824	16.301	1.268
2.488	13.253	16.28	1.138
2.495	14.045	16.185	1.177
2.502	13.197	15.504	1.161
2.51	13.761	15.867	1.184
2.517	14.032	15.704	1.203
2.524	14.103	15.654	1.198
2.531	13.872	15.496	1.187
2.538	13.434	15.952	1.183
2.545	14.41	15.817	1.175
2.552	14.026	15.074	1.167
2.56	14.219	16.341	1.192
2.567	14.435	14.05	1.112
2.574	15.014	14.698	1.195
2.581	15.409	14.307	1.157
2.588	17.437	15.763	1.25
2.595	17.712	14.584	1.2
2.603	18.847	13.752	1.175
2.61	19.831	14.147	1.227
2.617	21.006	13.771	1.357
2.624	21.73	14.06	1.297
2.631	20.783	12.621	1.186
2.638	23.002	13.76	1.332
2.645	25.121	13.61	1.379
2.653	23.235	12.628	1.262
2.66	23.041	12.64	1.208
2.667	26.865	12.63	1.351
2.674	25.833	13.401	1.318
2.681	27.501	12.722	1.316
2.688	26.912	13.141	1.467
2.695	27.119	12.195	1.351
2.703	26.668	11.876	1.265
2.71	29.044	12.403	1.431
2.717	29.671	12.13	1.338
2.724	28.9	11.646	1.357
2.731	29.094	12.589	1.365
2.738	30.271	11.483	1.319
2.746	32.562	12.216	1.409
2.753	32.373	12.002	1.517
2.76	33.278	11.925	1.462
2.767	29.316	10.217	1.318
2.774	32.217	11.513	1.469
2.781	33.226	11.226	1.41
2.788	34.794	10.991	1.56
2.796	34.718	11.155	1.618
2.803	35.162	10.184	1.442
2.81	34.108	9.554	1.419
2.817	32.745	9.38	1.324
2.824	35.913	9.688	1.387
2.831	35.167	10.723	1.446
2.838	32.493	9.313	1.31
2.846	33.901	10.521	1.41
2.853	33.675	10.321	1.385
2.86	32.535	10.756	1.437
2.867	31.067	11.729	1.34
2.874	29.549	10.923	1.384
2.881	27.733	11.56	1.322
2.889	27.319	11.594	1.195
2.896	26.556	12.654	1.262
2.903	27.68	13.485	1.263
2.91	24.878	12.553	1.216
2.917	23.565	13.106	1.185
2.924	22.729	14.526	1.253
2.931	22.278	13.049	1.082
2.939	22.592	13.712	1.289
2.946	21.372	13.849	1.115
2.953	19.514	13.317	1.144
2.96	20.86	17.58	1.479
2.967	20.15	13.494	1.144
2.974	20.986	14.933	1.154
2.981	20.215	15.644	1.177
2.989	20.427	16.025	1.191
2.996	18.706	15.884	1.067
3.003	18.384	15.55	1.124
3.01	19.248	15.492	1.19
3.017	19.769	16.639	1.212
3.024	19.363	16.316	1.2
3.032	17.564	15.249	1.213
3.039	18.227	16.128	1.109
3.046	17.958	17.046	1.175
3.053	19.105	17.5	1.135
3.06	17.498	15.29	1.09
3.067	15.322	14.688	1.033
3.074	16.212	16.73	1.106
3.082	15.808	14.913	0.967
3.089	15.656	15.886	1.089
3.096	16.475	19.995	1.096
3.103	15.536	17.397	1.103
3.11	15.771	16.789	1.089
3.117	16.188	17.056	1.085
3.124	17.606	17.623	1.044
3.132	16.133	17.952	1.229
3.139	15.756	19.856	1.093
3.146	14.965	18.466	1.111
3.153	14.872	18.459	1.088
3.16	15.771	17.601	1.091
3.167	16.249	19.17	1.165
3.175	14.037	18.494	1.071
3.182	14.62	17.874	1.127
3.189	15.095	17.612	1.018
3.196	14.379	18.819	1.067
3.203	14.936	18.884	1.07
3.21	15.347	19.634	1.049
3.217	14.45	19.606	1.093
3.225	14.398	19.013	1.079
3.232	15.182	19.58	1.139
3.239	14.538	18.691	1.177
3.246	15.04	19.261	1.091
3.253	13.682	19.002	1.132
3.26	14.857	18.964	1.038
3.267	13.144	17.082	0.993
3.275	14.514	21.687	1.116
3.282	14.67	20.422	1.19
3.289	13.908	18.925	1.112
3.296	15.593	20.233	1.207
3.303	15.182	19.795	1.116
3.31	14.553	20.989	1.136
3.318	15.746	18.237	1.078
3.325	13.933	19.095	1.072
3.332	17.78	19.056	1.148
3.339	13.766	18.593	1.135
3.346	13.848	19.935	1.067
3.353	12.808	17.618	1.01
3.36	14.923	20.435	1.114
3.368	13.531	18.66	1.051
3.375	14.192	20.824	1.186
3.382	13.77	19.849	1.089
3.389	13.756	19.267	1.086
3.396	15.057	20.469	1.071
3.403	12.348	18.046	1.041
3.41	13.836	19.719	1.105
3.418	14.355	18.675	1.089
3.425	15.735	20.266	1.147
3.432	13.758	19.316	1.126
3.439	14.327	19.202	1.107
3.446	13.171	18.63	1.121
3.453	13.234	16.897	1.051
3.461	14.525	18.447	1.06
3.468	14.512	20.586	1.16
3.475	12.216	18.57	1.003
3.482	13.11	18.751	1.021
3.489	13.439	19.488	1.09
3.496	14.102	19.432	1.084
3.503	14.571	20.949	1.104
3.511	14.739	19.676	1.134
3.518	14.324	19.635	1.272
3.525	14.327	19.522	1.112
3.532	14.603	19.017	1.165
3.539	13.88	19.809	1.204
3.546	13.718	20.08	1.153
3.553	12.862	19.165	1.07
3.561	14.165	18.668	1.176
3.568	13.273	19.596	1.042
3.575	13.618	18.155	1.178
3.582	14.013	19.226	1.079
3.589	13.9	22.341	1.1
3.596	12.426	18.259	1.105
3.604	13.124	18.098	1.034
3.611	12.843	18.373	1.027
3.618	14.343	17.716	1.12
3.625	13.891	20.14	1.086
3.632	13.164	18.555	1.176
3.639	13.032	18.966	1.141
3.646	14.427	20.225	1.078
3.654	13.089	19.142	1.117
3.661	13.561	19.018	1.121
3.668	13.755	18.929	1.154
3.675	14.118	18.411	1.133
3.682	13.333	18.965	1.064
3.689	13.073	19.569	1.112
3.696	12.479	18.794	1.095
3.704	13.269	18.971	1.22
3.711	12.683	18.6	1.051
3.718	13.63	18.971	1.107
3.725	13.079	18.479	1.081
3.732	13.057	21.226	1.117
3.739	12.438	19.324	1.129
3.746	13.326	20.66	1.191
3.754	12.777	17.984	1.063
3.761	11.85	16.537	0.967
3.768	13.447	21.143	1.21
3.775	13.848	17.913	1.025
3.782	14.84	19.393	1.09
3.789	13.467	20.137	1.107
3.797	14.04	19.584	1.112
3.804	13.489	19.802	1.11
3.811	14.637	19.671	1.172
3.818	15.198	18.98	1.129
3.825	14.397	18.908	1.055
3.832	14.453	18.306	1.094
3.839	13.958	18.281	1.091
3.847	14.691	19.997	1.217
3.854	13.068	18.316	1.01
3.861	14.923	18.665	1.065
3.868	14.631	19.339	1.149
3.875	14.904	20.716	1.176
3.882	14.75	19.517	1.097
3.89	13.906	17.74	1.011
3.897	15.931	19.923	1.17
3.904	13.977	18.289	0.99
3.911	14.922	20.087	1.103
3.918	15.984	19.951	1.167
3.925	14.517	19.525	1.125
3.932	14.188	18.154	0.977
3.94	16.582	20.209	1.249
3.947	14.147	18.473	1.053
3.954	15.998	20.207	1.221
3.961	15.713	21.268	1.106
3.968	16.259	19.683	1.135
3.975	16.208	22.917	1.087
3.982	15.772	19.966	1.089
3.99	15.335	19.72	1.193
3.997	17.019	20.841	1.167
4.004	14.783	19.246	1.203
4.011	16.299	19.678	1.097
4.018	16.412	21.626	1.207
4.025	15.785	20.373	1.302
4.033	16.965	19.886	1.119
4.04	15.134	19.294	1.066
4.047	15.983	20.156	1.089
4.054	14.557	19.843	1.025
4.061	15.869	20.039	1.054
4.068	15.44	19.929	1.036
4.075	15.084	20.16	1.204
4.083	14.657	20.445	1.085
4.09	14.22	22.078	1.129
4.097	14.981	20.605	1.155
4.104	16.915	21.864	1.133
4.111	14.317	21.241	1.038
4.118	13.6	18.412	1.015
4.125	16.129	20.78	1.148
4.133	15.042	19.974	1.009
4.14	14.184	19.512	1.033
4.147	15.046	20.589	1.147
4.154	14.863	21.945	1.139
4.161	12.855	18.746	1.023
4.168	14.336	20.735	1.058
4.175	14.19	20.625	1.088
4.183	15.077	21.663	1.11
4.19	14.099	21.962	1.11
4.197	13.754	21.297	1.044
4.204	14.137	21.865	1.227
4.211	13.717	21.858	1.086
4.218	15.115	21.436	1.202
4.226	13.972	20.648	1.051
4.233	13.128	21.594	1.207
4.24	13.092	20.913	1.16
4.247	12.603	19.933	1.267
4.254	13.461	22.71	1.043
4.261	11.894	21.295	1.079
4.268	12.511	22.181	1.208
4.276	13.05	21.997	1.128
4.283	12.589	20.526	1.145
4.29	12.287	20.727	1.048
4.297	12.759	20.813	1.066
4.304	13.342	22.61	1.157
4.311	13.193	22.928	1.058
4.318	12.122	22.439	1.082
4.326	11.453	19.679	1.071
4.333	13.259	21.47	1.158
4.34	12.321	20.439	1.084
4.347	13.865	22.152	1.238
4.354	12.361	21.599	1.108
4.361	12.394	22.032	1.181
4.369	11.712	21.289	1.058
4.376	11.613	21.443	1.209
4.383	12.196	22.961	1.141
4.39	10.702	21.216	1.046
4.397	12.262	23.359	1.106
4.404	11.863	21.533	1.071
4.411	12.03	22.44	1.084
4.419	13.21	23.186	1.188
4.426	12.683	23.147	1.228
4.433	11.802	22.974	1.109
4.44	11.147	21.183	1.084
4.447	11.896	22.955	1.163
4.454	12.599	23.429	1.229
4.461	11.523	21.523	1.084
4.469	12.349	23.439	1.22
4.476	11.863	22.113	1.094
4.483	12.683	23.211	1.151
4.49	11.776	22.305	1.13
4.497	12.478	23.504	1.121
4.504	11.681	23.026	1.217
4.512	11.833	23.772	1.193
4.519	11.617	24.064	1.143
4.526	11.85	24.699	1.17
4.533	11.301	24.897	1.148
4.54	11.608	24.165	1.204
4.547	12.744	24.136	1.106
4.554	12.621	25.125	1.161
4.562	11.05	21.709	1.102
4.569	12.389	25.777	1.286
4.576	12.216	24.196	1.188
4.583	11.602	24.867	1.186
4.59	11.969	23.952	1.171
4.597	11.075	24.462	1.287
4.604	11.654	23.515	1.148
4.612	11.085	24.118	1.14
4.619	10.86	23.01	1.117
4.626	11.561	26.296	1.091
4.633	10.374	21.857	0.98
4.64	12.223	26.721	1.207
4.647	10.824	26.779	1.152
4.655	11.481	25.585	1.309
4.662	11.418	24.457	1.166
4.669	10.754	23.149	1.02
4.676	12.073	27.835	1.24
4.683	11.461	26.316	1.133
4.69	11.498	25.339	1.147
4.697	12.038	26.642	1.203
4.705	11.885	24.694	1.111
4.712	11.385	24.779	1.198
4.719	10.618	22.246	1.055
4.726	11.959	25.734	1.179
4.733	12.761	27.09	1.342
4.74	11.783	26.529	1.147
4.747	11.454	25.707	1.197
4.755	11.933	24.203	1.244
4.762	11.665	25.843	1.22
4.769	10.623	25.503	1.128
4.776	11.212	24.722	1.2
4.783	10.774	25.304	1.141
4.79	11.646	28.031	1.18
4.798	11.556	24.835	1.155
4.805	11.647	25.89	1.165
4.812	11.532	26.561	1.194
4.819	10.055	24.976	1.037
4.826	11.643	24.613	1.435
4.833	10.461	26.303	1.247
4.84	10.477	23.797	1.15
4.848	11.129	23.947	1.112
4.855	10.885	24.522	1.273
4.862	10.933	23.711	1.124
4.869	11.57	26.36	1.22
4.876	11.133	24.585	1.096
4.883	10.506	23.047	1.079
4.89	11.491	24.81	1.156
4.898	11.086	24.473	1.11
4.905	10.529	25.808	1.152
4.912	11.176	24.651	1.193
4.919	10.65	24.728	1.1
4.926	11.36	23.017	1.087
4.933	11.116	24.696	1.103
4.941	10.737	26.26	1.274
4.948	11.104	23.294	1.112
4.955	11.749	24.169	1.135
4.962	11.193	24.46	1.134
4.969	10.44	22.981	1.069
4.976	12.465	25.383	1.162
4.983	11.159	26.074	1.217
4.991	11.345	24.109	1.168
4.998	10.653	23.762	1.078
5.005	10.824	23.974	1.274
5.012	9.873	20.6	0.972
5.019	11.022	22.059	1.078
5.026	12.129	27.172	1.27
5.033	12.48	24.46	1.186
5.041	12.51	22.511	1.058
5.048	11.076	24.248	1.143
5.055	9.73	22.058	1.109
5.062	11.661	24.54	1.156
5.069	12.484	26.366	1.117
5.076	11.794	24.154	1.248
5.084	10.932	24.505	1.159
5.091	10.334	23.423	1.076
5.098	10.633	22.326	1.112
5.105	11.407	26.347	1.124
5.112	12.11	25.073	1.236
5.119	11.429	24.668	1.205
5.126	9.832	20.933	1.036
5.134	10.594	22.755	1.164
5.141	13.479	25.994	1.247
5.148	10.836	22.465	1.165
5.155	10.939	25.126	1.25
5.162	11.586	26.261	1.157
5.169	13.125	23.841	1.199
5.176	11.539	25.851	1.142
5.184	13.203	25.046	1.212
5.191	10.358	21.615	1.034
5.198	11.49	26.102	1.205
5.205	11.181	23.424	1.13
5.212	12.576	23.843	1.251
5.219	10.253	23.861	1.141
5.227	10.421	22.586	1.086
5.234	10.899	25.418	1.164
5.241	11.096	24.065	1.362
5.248	10.439	22.633	1.027
5.255	11.237	24.975	1.217
5.262	10.978	24.697	1.079
5.269	10.988	25.874	1.295
5.277	11.447	24.712	1.118
5.284	10.587	24.013	1.166
5.291	11.083	24.924	1.126
5.298	11.024	23.907	1.164
5.305	10.992	22.627	1.161
5.312	10.957	23.949	1.184
5.319	10.875	23.603	1.12
5.327	12.366	24.705	1.207
5.334	10.61	24.533	1.275
5.341	11.154	24.405	1.263
5.348	10.949	25.934	1.278
5.355	11.775	27.702	1.273
5.362	11.888	24.124	1.226
5.37	10.523	22.679	1.068
5.377	11.731	23.782	1.391
5.384	11.116	25.491	1.349
5.391	8.675	18.476	0.954
5.398	10.701	24	1.171
5.405	9.653	21.977	1.214
5.412	9.96	22.644	1.218
5.42	11.427	24.33	1.147
5.427	11.253	25.147	1.181
5.434	9.842	22.615	1.14
5.441	11.241	23.5	1.124
5.448	10.384	24.748	1.244
5.455	9.499	22.674	1.115
5.462	10.552	21.11	1.112
5.47	10.971	22.46	1.077
5.477	10.556	22.587	1.179
5.484	9.808	22.034	1.088
5.491	10.581	22.599	1.152
5.498	10.864	23.494	1.171
5.505	10.381	22.682	1.099
5.513	10.004	23.518	1.092
5.52	10.452	23.164	1.09
5.527	10.334	23.321	1.159
5.534	10.602	23.043	1.138
5.541	12.489	23.274	1.171
5.548	11.269	22.038	1.139
5.555	10.833	22.758	1.156
5.563	11.622	24.927	1.155
5.57	11.754	22.674	1.177
5.577	11.593	23.505	1.191
5.584	11.991	23.21	1.19
5.591	10.883	22.503	1.122
5.598	12.23	25.462	1.159
5.605	11.156	24	1.207
5.613	10.563	21.701	1.041
5.62	11.227	23.655	1.241
5.627	11.629	22.65	1.133
5.634	11.192	23.171	1.181
5.641	11.259	22.806	1.192
5.648	10.278	20.161	0.975
5.656	11.745	24.144	1.126
5.663	11.287	20.742	1.214
5.67	11.167	22.002	1.17
5.677	11.036	21.893	1.138
5.684	11.133	23.372	1.132
5.691	12.172	23.356	1.228
5.698	12.662	25.692	1.175
5.706	11.86	23.042	1.059
5.713	10.101	19.328	1.153
5.72	13.057	22.806	1.226
5.727	12.152	22.237	1.267
5.734	11.149	21.408	1.118
5.741	11.271	21.714	1.21
5.748	11.871	22.35	1.137
5.756	11.121	23.162	1.046
5.763	11.991	21.294	1.309
5.77	11.971	21.623	1.228
5.777	11.777	22.923	1.111
5.784	10.095	17.786	1.016
5.791	11.712	21.812	1.133
5.798	11.294	21.592	1.209
5.806	12.636	24.552	1.208
5.813	11.344	23.674	1.211
5.82	12.537	21.768	1.237
5.827	11.524	20.782	1.179
5.834	13.485	22.437	1.218
5.841	13.065	24.362	1.268
5.849	11.372	20.232	1.134
5.856	12.251	22.745	1.215
5.863	11.565	21.865	1.164
5.87	11.565	22.204	1.18
5.877	11.572	19.546	1.211
5.884	11.966	21.626	1.233
5.891	11.879	21.858	1.188
5.899	11.852	21.161	1.172
5.906	12.334	22.129	1.239
5.913	12.457	21.867	1.185
5.92	12.332	24.065	1.219
5.927	11.801	23.019	1.2
5.934	14.745	21.877	1.287
5.941	13.491	23.921	1.339
5.949	13.616	21.44	1.424
5.956	13.175	21.855	1.129
5.963	13.469	22.993	1.27
5.97	13.583	22.188	1.228
5.977	13.319	21.796	1.219
5.984	12.042	22.502	1.174
5.992	12.561	22.173	1.252
5.999	13.74	21.918	1.227
6.006	12.158	20.789	1.261
6.013	12.071	20.475	1.125
6.02	13.294	20.667	1.246
6.027	13.042	22.225	1.293
6.034	16.691	23.621	1.192
6.042	13.621	23.359	1.294
6.049	11.345	19.628	1.112
6.056	13.084	21.601	1.162
6.063	13.222	22.145	1.224
6.07	12.504	21.908	1.135
6.077	11.604	19.457	1.045
6.085	13.537	23.376	1.129
6.092	13.397	21.561	1.221
6.099	12.896	21.281	1.1
6.106	13.696	23.074	1.154
6.113	14.304	24.18	1.274
6.12	12.745	21.471	1.15
6.127	12.72	21.529	1.229
6.135	14.367	23.153	1.276
6.142	12.984	20.801	1.148
6.149	13.296	22.338	1.286
6.156	13.608	22.692	1.303
6.163	14.545	23.515	1.254
6.17	14.081	25.1	1.178
6.177	14.444	22.623	1.205
6.185	11.825	20.89	1.085
6.192	11.838	21.865	1.196
6.199	13.24	21.762	1.228
6.206	12.994	22.76	1.294
6.213	14.763	22.661	1.188
6.22	13.19	22.623	1.204
6.227	13.134	23.204	1.211
6.235	12.754	22.255	1.228
6.242	13.033	22.111	1.211
6.249	13.213	24.31	1.183
6.256	12.806	21.611	1.24
6.263	12.539	21.262	1.083
6.27	13.654	23.069	1.187
6.278	12.339	24.422	1.235
6.285	13.076	22.127	1.168
6.292	14.28	23.35	1.261
6.299	13.417	22.427	1.202
6.306	12.434	22.351	1.142
6.313	13.076	23.655	1.155
6.32	13.673	23.2	1.212
6.328	12.956	23.98	1.205
6.335	14.166	23.953	1.276
6.342	13.187	21.817	1.189
6.349	12.797	21.146	1.269
6.356	13.063	22.883	1.226
6.363	13.642	23.556	1.262
6.37	12.861	23.171	1.205
6.378	13.231	23.585	1.215
6.385	13.483	24.634	1.189
6.392	13.042	23.399	1.269
6.399	12.149	21.532	1.096
6.406	11.556	20.486	1.096
6.413	14.061	25.16	1.247
6.421	13.303	25.366	1.422
6.428	12.576	22.95	1.222
6.435	13.795	24.346	1.27
6.442	13.593	26.852	1.231
6.449	12.227	22.548	1.117
6.456	14.704	24.446	1.235
6.463	10.976	21.173	1.047
6.471	12.926	24.047	1.165
6.478	12.009	23.066	1.166
6.485	13.608	26.931	1.197
6.492	13.476	23.783	1.321
6.499	12.753	23.713	1.251
6.506	12.546	24.349	1.16
6.513	13.906	25.082	1.232
6.521	12.554	24.334	1.27
6.528	11.9	22.516	1.112
6.535	12.269	22.911	1.145
6.542	11.299	21.374	1.134
6.549	12.348	24.714	1.119
6.556	12.862	24.633	1.225
6.564	13.999	25.864	1.157
6.571	13.306	23.966	1.302
6.578	10.987	21.418	1.065
6.585	13.131	23.984	1.21
6.592	14.431	24.015	1.132
6.599	12.608	23.299	1.219
6.606	13.409	22.828	1.196
6.614	11.887	24.295	1.236
6.621	11.814	21.887	1.192
6.628	12.778	24.256	1.167
6.635	11.21	20.907	1.072
6.642	10.976	21.782	1.076
6.649	11.699	23.087	1.16
6.656	12.056	22.987	1.184
6.664	12.196	23.999	1.199
6.671	12.122	22.611	1.178
6.678	11.394	21.6	1.17
6.685	12.013	25.582	1.218
6.692	12.126	23.935	1.225
6.699	12.019	23.53	1.182
6.707	11.802	22.651	1.143
6.714	11.755	22.077	1.178
6.721	15.373	22.553	1.161
6.728	12.021	23.858	1.158
6.735	12.003	22.311	1.199
6.742	13.029	22.914	1.267
6.749	11.514	23.257	1.136
6.757	11.762	23.068	1.239
6.764	12.194	22.638	1.224
6.771	11.643	22.937	1.178
6.778	11.731	21.816	1.175
6.785	11.678	21.844	1.299
6.792	12.664	23.586	1.238
6.799	11.807	23.203	1.208
6.807	11.833	23.154	1.273
6.814	12.001	23.006	1.264
6.821	12.372	22.346	1.2
6.828	12.749	23.72	1.235
6.835	11.789	22.445	1.229
6.842	12.503	25.05	1.237
6.85	12.218	22.879	1.22
6.857	11.936	23.28	1.211
6.864	11.769	24.217	1.227
6.871	12.383	24.49	1.272
6.878	11.895	23.411	1.227
6.885	11.601	24.299	1.237
6.892	12.116	24.049	1.236
6.9	11.647	22.629	1.229
6.907	11.967	22.956	1.248
6.914	12.513	23.252	1.204
6.921	11.77	23.182	1.199
6.928	11.822	23.026	1.265
6.935	12.168	23.346	1.256
6.942	12.349	23.344	1.257
6.95	12.329	23.365	1.249
6.957	12.367	23.57	1.309
6.964	12.496	23.249	1.252
6.971	12.15	23.954	1.256
6.978	12.383	23.745	1.27
6.985	11.996	23.724	1.257
6.993	11.943	23.398	1.276
7	11.974	23.657	1.295
7.007	12.613	24.831	1.277
7.014	12.024	23.792	1.222
7.021	11.98	23.011	1.25
7.028	12.031	23.32	1.297
7.035	12.093	24.553	1.261
7.043	12.059	24.394	1.21
7.05	12.216	24.072	1.207
7.057	12.038	23.102	1.204
7.064	11.802	23.169	1.225
7.071	12.864	24.225	1.232
7.078	12.179	22.464	1.199
7.085	11.714	22.1	1.134
7.093	12.278	23.28	1.238
7.1	13.067	23.89	1.269
7.107	11.857	22.461	1.169
7.114	11.718	21.342	1.155
7.121	11.879	22.738	1.254
7.128	12.26	23.046	1.19
7.136	11.819	22.756	1.148
7.143	12.272	23.054	1.155
7.15	12.481	22.73	1.159
7.157	11.888	23.062	1.199
7.164	12.204	23.153	1.152
7.171	12.374	23.896	1.228
7.178	12.372	23.433	1.183
7.186	12.276	22.868	1.222
7.193	13.218	22.788	1.173
7.2	12.74	23.624	1.184
7.207	13.052	22.574	1.201
7.214	12.738	23.87	1.178
7.221	12.638	22.159	1.152
7.228	12.346	21.36	1.175
7.236	12.33	21.292	1.097
7.243	12.72	22.62	1.149
7.25	12.476	22.413	1.146
7.257	12.871	22.466	1.205
7.264	13.198	22.789	1.185
7.271	12.701	21.772	1.168
7.279	12.685	21.351	1.138
7.286	12.688	21.92	1.161
7.293	14.858	22.501	1.182
7.3	13.516	21.059	1.114
7.307	13.729	21.482	1.17
7.314	14.773	21.203	1.178
7.321	13.669	21.687	1.156
7.329	13.77	21.188	1.146
7.336	13.653	19.627	1.08
7.343	14.834	21.684	1.148
7.35	14.29	20.564	1.143
7.357	15.788	21.666	1.211
7.364	15.188	20.409	1.17
7.371	15.049	20.071	1.169
7.379	14.763	19.246	1.106
7.386	16.51	20.344	1.158
7.393	16.926	21.538	1.172
7.4	15.504	18.71	1.101
7.407	17.082	20.501	1.173
7.414	16.462	19.175	1.2
7.422	18.009	18.767	1.166
7.429	17.501	19.114	1.194
7.436	17.229	19.203	1.168
7.443	15.888	17.341	1.082
7.45	19.179	18.894	1.179
7.457	18.267	18.695	1.193
7.464	20.467	18.666	1.224
7.472	18.176	17.948	1.158
7.479	18.772	18.21	1.189
7.486	18.79	17.636	1.148
7.493	19.289	17.383	1.13
7.5	18.843	16.613	1.151
7.507	20.641	16.776	1.198
7.514	21.144	17.043	1.212
7.522	20.093	16.814	1.158
7.529	22.421	16.629	1.187
7.536	20.552	15.325	1.148
7.543	22.142	16.094	1.172
7.55	21.818	15.92	1.191
7.557	23.04	16.088	1.222
7.565	23.222	15.301	1.208
7.572	23.037	15.14	1.237
7.579	23.285	15.079	1.232
7.586	24.202	15.068	1.216
7.593	25.692	13.775	1.173
7.6	23.669	13.848	1.243
7.607	25.091	14.612	1.27
7.615	23.315	13.724	1.231
7.622	24.431	14.762	1.296
7.629	25.566	13.818	1.223
7.636	23.696	13.66	1.253
7.643	25.918	13.789	1.238
7.65	25.542	14.244	1.334
7.657	24.9	14.378	1.297
7.665	25.614	14.396	1.216
7.672	24.722	13.866	1.24
7.679	26.273	13.701	1.317
7.686	24.812	13.614	1.219
7.693	22.758	12.742	1.179
7.7	24.784	13.514	1.389
7.708	22.985	12.751	1.182
7.715	24.13	13.637	1.27
7.722	25.504	13.45	1.267
7.729	26.042	14.031	1.358
7.736	25.018	13.703	1.313
7.743	24.302	13.716	1.257
7.75	25.375	14.606	1.281
7.758	24.104	13.478	1.249
7.765	25.915	14.227	1.282
7.772	24.982	13.867	1.247
7.779	24.696	14.137	1.268
7.786	23.616	13.918	1.265
7.793	23.796	14.075	1.355
7.8	25.151	14.153	1.289
7.808	25.48	14.246	1.233
7.815	23.584	14.663	1.253
7.822	22.359	13.311	1.223
7.829	24.227	14.331	1.2
7.836	23.824	15.532	1.259
7.843	24.688	14.633	1.285
7.85	22.642	15.01	1.251
7.858	22.067	15.14	1.218
7.865	21.936	15.578	1.179
7.872	21.303	14.871	1.167
7.879	20.666	15.058	1.281
7.886	20.664	14.911	1.194
7.893	20.468	15.705	1.14
7.901	20.023	14.458	1.169
7.908	19.058	14.909	1.106
7.915	20.573	16.213	1.263
7.922	19.52	15.721	1.167
7.929	20.783	16.826	1.187
7.936	20.052	15.907	1.222
7.943	19.055	17.061	1.244
7.951	20.368	16.296	1.2
7.958	18.404	15.405	1.238
7.965	18.859	15.991	1.172
7.972	18.378	16.329	1.181
7.979	17.803	16.356	1.156
7.986	18.35	17.432	1.273
7.993	19.002	17.76	1.27
8.001	18.283	16.53	1.219
8.008	17.278	16.639	1.122
8.015	17.535	15.951	1.156
8.022	17.668	16.96	1.29
8.029	19.104	17.797	1.218
8.036	18.05	16.399	1.206
8.044	18.106	16.845	1.191
8.051	17.638	16.598	1.227
8.058	17.565	17.953	1.198
8.065	17.504	17.386	1.206
8.072	17.349	16.965	1.243
8.079	15.809	16.496	1.097
8.086	16.691	19.507	1.35
8.094	18.05	16.99	1.19
8.101	16.83	17.384	1.194
8.108	17.226	16.635	1.122
8.115	17.251	17.88	1.219
8.122	16.509	19.029	1.292
8.129	17.93	18.547	1.257
8.136	15.965	16.79	1.15
8.144	16.786	17.329	1.184
8.151	17.672	18.594	1.251
8.158	15.959	17.518	1.174
8.165	16.835	18.393	1.241
8.172	17.432	18.194	1.25
8.179	16.034	18.985	1.153
8.187	16.79	18.174	1.194
8.194	16.024	17.786	1.147
8.201	15.674	18.317	1.198
8.208	15.854	19.311	1.14
8.215	15.763	18.705	1.204
8.222	15.041	19.414	1.187
8.229	17.225	19.519	1.233
8.237	15.379	18.907	1.18
8.244	16.771	20.115	1.185
8.251	16.162	19.744	1.18
8.258	16.123	20.178	1.231
8.265	14.604	19.312	1.121
8.272	16.854	19.088	1.156
8.279	16.146	19.645	1.201
8.287	16.123	19.956	1.114
8.294	15.564	18.819	1.088
8.301	14.835	20.05	1.112
8.308	14.448	20.698	1.138
8.315	14.881	18.884	1.164
8.322	14.725	19.943	1.127
8.33	15.009	19.83	1.117
8.337	14.712	19.816	1.197
8.344	15.133	21.092	1.131
8.351	14.595	19.341	1.095
8.358	14.688	20.824	1.139
8.365	14.448	19.144	1.155
8.372	13.899	19.528	1.145
8.38	13.979	19.947	1.141
8.387	14.741	22.082	1.254
8.394	14.186	21.927	1.162
8.401	14.548	20.233	1.189
8.408	13.781	19.569	1.297
8.415	14.668	21.41	1.165
8.422	12.848	20.072	1.161
8.43	12.857	20.238	1.128
8.437	14.18	21.723	1.309
8.444	13.584	20.299	1.116
8.451	14.153	21.746	1.159
8.458	13.233	20.797	1.164
8.465	12.726	19.184	1.155
8.473	13.3	20.994	1.157
8.48	13.693	20.459	1.226
8.487	11.899	19.363	1.08
8.494	14.319	21.054	1.182
8.501	13.188	21.545	1.146
8.508	13.319	20.927	1.215
8.515	13.26	20.544	1.164
8.523	14.258	21.064	1.12
8.53	13.77	20.05	1.174
8.537	13.19	20.535	1.163
8.544	13.388	20.574	1.205
8.551	13.367	19.652	1.274
8.558	12.422	18.634	1.04
8.565	12.974	19.593	1.167
8.573	12.909	19.709	1.095
8.58	12.739	18.739	1.124
8.587	12.683	19.212	1.163
8.594	13.39	19.968	1.196
8.601	13.455	20.248	1.14
8.608	16.622	20.051	1.146
8.616	13.576	19.104	1.121
8.623	12.824	18.937	1.096
8.63	12.607	20.276	1.228
8.637	13.068	19.787	1.161
8.644	13.593	19.822	1.125
8.651	12.759	18.781	1.085
8.658	13.457	18.596	1.231
8.666	12.714	20.076	1.126
8.673	12.546	18.256	1.101
8.68	14.501	19.76	1.223
8.687	12.234	18.589	1.074
8.694	13.383	19.125	1.119
8.701	13.189	18.032	1.151
8.708	12.699	18.59	1.124
8.716	13.328	20.82	1.117
8.723	12.78	17.692	1.102
8.73	13.965	19.069	1.158
8.737	13.392	20.769	1.143
8.744	13.342	19.804	1.124
8.751	13.386	19.682	1.155
8.759	13.069	19.492	1.118
8.766	13.543	19.889	1.214
8.773	12.912	20.03	1.187
8.78	13.189	19.877	1.079
8.787	13.696	20.862	1.19
8.794	12.667	20.179	1.205
8.801	12.394	19.501	1.148
8.809	12.632	19.464	1.121
8.816	13.927	20.288	1.142
8.823	12.932	20.372	1.185
8.83	13.75	19.6	1.18
8.837	12.846	20.414	1.234
8.844	12.966	19.182	1.165
8.851	12.452	18.458	1.031
8.859	13.08	20.456	1.26
8.866	12.181	18.994	1.144
8.873	13.49	19.684	1.176
8.88	12.784	20.383	1.219
8.887	12.518	19.205	1.074
8.894	12.619	21.61	1.175
8.902	12.87	19.91	1.092
8.909	13.386	21.71	1.214
8.916	12.661	19.467	1.165
8.923	13.235	20.343	1.191
8.93	12.756	21.253	1.2
8.937	13.536	20.494	1.171
8.944	13.306	21.571	1.203
8.952	12.239	19.29	1.086
8.959	12.703	20.297	1.301
8.966	12.621	22.537	1.241
8.973	13.097	20.433	1.19
8.98	12.353	22.098	1.112
8.987	12.2	21.082	1.151
8.994	12.038	21.156	1.129
9.002	15.049	21.101	1.182
9.009	12.166	22.707	1.16
9.016	12.854	21.492	1.179
9.023	12.682	21.297	1.257
9.03	12.609	22.318	1.191
9.037	11.943	21.172	1.164
9.045	12.176	22.498	1.313
9.052	12.771	22.416	1.182
9.059	11.351	21.705	1.19
9.066	12.151	21.826	1.228
9.073	12.099	21.825	1.181
9.08	11.838	22.993	1.106
9.087	11.766	22.05	1.206
9.095	12.112	21.53	1.208
9.102	11.911	21.671	1.226
9.109	12.071	22.118	1.203
9.116	11.113	21.522	1.125
9.123	11.713	22.145	1.2
9.13	11.378	20.679	1.185
9.137	11.586	21.045	1.238
9.145	11.961	21.4	1.238
9.152	11.381	20.962	1.136
9.159	11.172	22.025	1.215
9.166	10.999	20.989	1.165
9.173	11.126	21.928	1.13
9.18	11.456	21.612	1.261
9.188	10.552	23.259	1.109
9.195	11.143	21.232	1.247
9.202	11.403	21.077	1.224
9.209	11.543	21.415	1.165
9.216	12.205	20.637	1.252
9.223	11.147	21.891	1.259
9.23	10.611	20.87	1.156
9.238	10.925	20.902	1.227
9.245	10.944	21.577	1.234
9.252	11.3	21.311	1.223
9.259	10.778	22.506	1.29
9.266	10.095	20.022	1.096
9.273	10.191	20.414	1.176
9.28	10.798	21.16	1.195
9.288	11.396	22.916	1.284
9.295	10.817	21.847	1.218
9.302	11.663	21.501	1.291
9.309	11.251	22.403	1.225
9.316	10.81	22.548	1.276
9.323	11.192	21.763	1.281
9.331	10.421	20.104	1.2
9.338	10.979	21.114	1.267
9.345	10.335	19.615	1.261
9.352	10.959	21.091	1.258
9.359	10.818	21.492	1.279
9.366	10.906	20.949	1.269
9.373	10.494	20.29	1.229
9.381	10.531	20.696	1.286
9.388	11.065	20.432	1.299
9.395	10.691	21.302	1.319
9.402	11.161	21.09	1.275
9.409	10.681	20.858	1.251
9.416	11.88	21.736	1.331
9.423	11.026	21.072	1.289
9.431	11.563	21.188	1.341
9.438	10.844	20.879	1.238
9.445	12.101	22.024	1.323
9.452	11.088	21.319	1.272
9.459	11.295	21.068	1.311
9.466	11.422	21.237	1.353
9.474	11.134	21.207	1.304
9.481	11.627	20.929	1.291
9.488	11.562	22.413	1.373
9.495	11.686	21.467	1.279
9.502	12.154	22.235	1.362
9.509	11.418	21.295	1.292
9.516	11.317	21.245	1.239
9.524	12.08	21.431	1.274
9.531	12.187	21.194	1.209
9.538	11.872	21.838	1.283
9.545	12.54	22.181	1.258
9.552	12.743	23.204	1.368
9.559	12.761	21.89	1.263
9.566	12.188	21.304	1.273
9.574	13.345	21.494	1.288
9.581	12.583	21.184	1.281
9.588	12.148	21.67	1.2
9.595	12.549	21.948	1.302
9.602	12.436	20.345	1.208
9.609	12.792	21.436	1.219
9.617	13.823	21.544	1.268
9.624	12.339	20.059	1.175
9.631	13.21	21.118	1.247
9.638	13.969	21.241	1.233
9.645	13.966	20.875	1.19
9.652	15.039	21.079	1.232
9.659	12.711	20.293	1.182
9.667	13.474	21.317	1.219
9.674	13.592	19.899	1.153
9.681	14.133	21.868	1.204
9.688	13.807	21.509	1.173
9.695	13.919	22.282	1.223
9.702	13.388	19.998	1.23
9.709	13.245	19.066	1.139
9.717	13.071	19.23	1.087
9.724	14.052	19.535	1.113
9.731	15.018	19.129	1.137
9.738	13.683	18.915	1.152
9.745	13.77	18.07	1.094
9.752	14.117	18.531	1.114
9.76	14.777	18.204	1.122
9.767	14.543	17.459	1.158
9.774	14.026	17.651	1.146
9.781	14.99	17.971	1.174
9.788	14.057	16.864	1.104
9.795	13.983	17.122	1.09
9.802	15.511	17.786	1.152
9.81	15.342	17.484	1.072
9.817	14.694	16.645	1.085
9.824	14.384	15.95	1.095
9.831	14.9	16.123	1.076
9.838	14.602	15.79	1.149
9.845	15.108	16.594	1.154
9.852	15.3	16.428	1.151
9.86	15.581	16.652	1.195
9.867	14.945	15.495	1.114
9.874	19.52	16.069	1.147
9.881	14.812	17.02	1.146
9.888	14.628	14.833	1.072
9.895	14.947	15.637	1.155
9.903	14.456	14.956	1.062
9.91	14.839	15.347	1.154
9.917	15.257	16.261	1.189
9.924	15.6	15.459	1.184
9.931	15.809	14.97	1.109
9.938	15.443	15.323	1.194
9.945	15.388	15.554	1.166
9.953	15.65	15.664	1.189
9.96	15.714	15.403	1.19
9.967	15.252	14.868	1.151
9.974	14.08	13.159	1.009
9.981	17.393	16.53	1.257
9.988	15.695	15.217	1.158
9.995	14.869	14.846	1.169
10.003	15.981	15.929	1.146
10.01	15.865	15.364	1.187
10.017	15.773	16.006	1.162
10.024	16.19	15.186	1.27
10.031	15.768	15.357	1.168
10.038	16.928	15.788	1.259
10.045	16.148	15.347	1.181
10.053	16.002	15.598	1.163
10.06	15.619	15.922	1.128
10.067	14.855	15.037	1.074
10.074	16.084	15.003	1.173
10.081	15.451	15.518	1.167
10.088	15.578	15.747	1.141
10.096	15.553	14.796	1.097
10.103	14.951	14.681	1.139
10.11	15.992	15.317	1.164
10.117	17.67	15.406	1.138
10.124	15.276	15.456	1.141
10.131	16.394	15.833	1.168
10.138	16.225	16.168	1.154
10.146	16.676	16.48	1.223
10.153	16.218	15.998	1.162
10.16	16.339	16.28	1.203
10.167	17.222	15.816	1.161
10.174	16.396	15.668	1.136
10.181	16.97	16.089	1.169
10.188	16.46	15.623	1.154
10.196	16.56	15.366	1.136
10.203	16.878	16.33	1.145
10.21	15.832	14.831	1.158
10.217	15.669	17.239	1.11
10.224	16.66	16.135	1.223
10.231	16.227	15.322	1.123
10.239	15.96	15.097	1.117
10.246	15.722	14.826	1.108
10.253	16.129	14.872	1.148
10.26	16.842	15.742	1.143
10.267	15.491	14.738	1.092
10.274	16.755	17.185	1.122
10.281	16.792	14.543	1.121
10.289	17.028	15.602	1.191
10.296	16.415	14.616	1.091
10.303	17.189	16.497	1.129
10.31	15.308	14.646	1.077
10.317	16.393	16.704	1.138
10.324	16.332	14.584	1.093
10.331	16.779	15.378	1.182
10.339	16.869	15.504	1.203
10.346	18.358	15.166	1.183
10.353	17.318	15.833	1.173
10.36	16.951	15.418	1.205
10.367	16.877	15.171	1.18
10.374	16.896	15.008	1.131
10.382	16.064	15.084	1.089
10.389	16.955	15.249	1.152
10.396	17.816	15.62	1.161
10.403	16.208	15.022	1.107
10.41	16.228	15.253	1.15
10.417	16.282	15.559	1.118
10.424	16.072	15.26	1.183
10.432	16.908	15.098	1.141
10.439	15.778	14.737	1.09
10.446	16.719	15.454	1.138
10.453	16.664	15.82	1.176
10.46	15.988	14.529	1.13
10.467	15.803	15.686	1.126
10.474	16.609	15.72	1.165
10.482	16.837	16.295	1.191
10.489	17.137	15.016	1.178
10.496	18.015	15.762	1.153
10.503	16.333	16.072	1.174
10.51	16.657	15.73	1.113
10.517	17.332	16.104	1.171
10.525	17.697	16.062	1.204
10.532	17.133	16.348	1.188
10.539	16.95	16.166	1.241
10.546	17.922	16.201	1.167
10.553	15.959	15.952	1.149
10.56	16.905	16.657	1.207
10.567	16.03	16.695	1.152
10.575	16.041	16.524	1.156
10.582	16.492	16.816	1.239
10.589	16.157	16.613	1.148
10.596	15.417	16.918	1.092
10.603	16.496	16.903	1.186
10.61	15.571	16.307	1.169
10.617	17.266	17.09	1.191
10.625	15.687	16.365	1.182
10.632	16.341	17.338	1.234
10.639	16.667	17.379	1.192
10.646	17.146	16.517	1.185
10.653	16.449	16.916	1.224
10.66	16.192	17.062	1.162
10.668	15.733	16.225	1.122
10.675	15.703	17.313	1.193
10.682	16.476	16.793	1.223
10.689	16.308	17.609	1.166
10.696	16.591	17.281	1.29
10.703	15.409	16.326	1.123
10.71	16.644	17.668	1.251
10.718	17.609	17.198	1.178
10.725	16.328	17.057	1.253
10.732	16.94	18.62	1.162
10.739	16.18	17.14	1.182
10.746	16.834	17.849	1.234
10.753	16.597	18.656	1.231
10.76	17.18	17.116	1.245
10.768	16.617	17.162	1.171
10.775	17.047	17.534	1.25
10.782	17.109	17.883	1.195
10.789	17.647	17.576	1.254
10.796	18.193	17.107	1.252
10.803	18.518	17.191	1.319
10.811	17.885	17.462	1.186
10.818	18.928	17.703	1.158
10.825	19.62	16.777	1.163
10.832	19.006	17.15	1.198
10.839	19.209	17.689	1.275
10.846	20.844	17.308	1.22
10.853	19.037	16.595	1.163
10.861	19.235	16.915	1.197
10.868	19.227	16.46	1.162
10.875	20.717	16.702	1.154
10.882	21.519	16.314	1.161
10.889	21.129	16.234	1.205
10.896	20.408	16.052	1.219
10.903	19.182	14.675	1.077
10.911	20.376	17.022	1.193
10.918	20.629	15.851	1.177
10.925	21.6	15.467	1.19
10.932	22.388	14.931	1.216
10.939	22.624	14.636	1.22
10.946	23.103	14.48	1.222
10.954	22.894	14.009	1.205
10.961	24.506	14.008	1.301
10.968	25.12	15.029	1.272
10.975	24.885	13.357	1.243
10.982	25.27	12.861	1.281
10.989	26.507	13.507	1.292
10.996	26.478	12.938	1.275
11.004	28.507	12.907	1.387
11.011	28.569	13.021	1.339
11.018	28.75	13.973	1.339
11.025	29.199	12.963	1.516
11.032	29.756	12.085	1.38
11.039	28.492	11.836	1.341
11.046	31.044	11.992	1.387
11.054	29.413	11.706	1.364
11.061	29.981	12.469	1.377
11.068	32.171	12.335	1.401
11.075	29.431	11.291	1.351
11.082	30.687	12.041	1.433
11.089	30.91	11.933	1.44
11.097	31.693	12.205	1.422
11.104	31	12.413	1.411
11.111	29.691	11.778	1.387
11.118	29.856	11.556	1.337
11.125	29.97	13.612	1.403
11.132	30.475	12.45	1.413
11.139	29.423	12.717	1.363
11.147	29.333	12.5	1.367
11.154	28.967	13.159	1.39
11.161	28.467	13.992	1.453
11.168	28.065	14.153	1.423
11.175	28.25	14.146	1.398
11.182	26.58	14.236	1.335
11.189	26.009	14.549	1.296
11.197	24.496	14.747	1.313
11.204	23.829	15.427	1.323
11.211	23	15.3	1.287
11.218	22.897	16.292	1.332
11.225	21.462	15.855	1.237
11.232	21.192	16.675	1.253
11.24	20.313	16.683	1.208
11.247	19.327	16.605	1.194
11.254	18.967	16.906	1.211
11.261	19.959	18.091	1.217
11.268	17.801	16.72	1.133
11.275	17.862	17.208	1.2
11.282	17.831	17.439	1.182
11.29	17.626	17.77	1.129
11.297	17.507	18.151	1.196
11.304	17.401	18.407	1.161
11.311	17.375	18.117	1.225
11.318	15.389	16.372	1.105
11.325	16.561	17.757	1.191
11.332	16.45	17.719	1.169
11.34	16.575	18.11	1.163
11.347	16.462	18.27	1.163
11.354	16.106	18.521	1.157
11.361	16.749	18.879	1.17
11.368	15.182	18.271	1.087
11.375	14.809	17.147	1.119
11.383	16.326	18.764	1.224
11.39	15.617	18.56	1.178
11.397	15.279	17.345	1.117
11.404	15.691	18.908	1.166
11.411	14.829	16.926	1.067
11.418	15.404	17.755	1.131
11.425	15.5	18.768	1.172
11.433	15.927	18.549	1.132
11.44	15.074	17.656	1.214
11.447	15.04	18.197	1.165
11.454	15.088	18.211	1.162
11.461	14.837	17.78	1.245
11.468	15.446	17.915	1.175
11.475	15.081	17.518	1.224
11.483	14.726	17.131	1.204
11.49	15.044	17.451	1.183
11.497	14.813	17.377	1.148
11.504	14.893	17.34	1.187
11.511	14.379	17.042	1.153
11.518	14.743	17.472	1.172
11.526	15.017	17.602	1.187
11.533	15.439	17.41	1.254
11.54	15.502	17.408	1.24
11.547	14.019	16.006	1.144
11.554	14.608	17.151	1.207
11.561	14.32	17.114	1.184
11.568	14.603	18.443	1.26
11.576	15.949	19.586	1.247
11.583	14.928	17.881	1.152
11.59	14.149	17.754	1.167
11.597	14.074	17.34	1.185
11.604	14.539	17.148	1.187
11.611	14.427	16.869	1.187
11.618	14.888	18.13	1.212
11.626	14.391	21.712	1.207
11.633	14.71	17.133	1.163
11.64	14.148	17.806	1.182
11.647	14.465	18.418	1.254
11.654	13.986	18.506	1.204
11.661	14.304	17.798	1.246
11.669	13.916	17.789	1.189
11.676	14.114	17.044	1.198
11.683	14.375	17.349	1.209
11.69	13.793	17.035	1.252
11.697	13.469	16.965	1.172
11.704	14.511	18.501	1.209
11.711	13.958	17.122	1.216
11.719	14.527	17.458	1.256
11.726	14.489	17.718	1.23
11.733	14.815	17.491	1.229
11.74	14.362	16.84	1.186
11.747	14.928	17.396	1.285
11.754	15.019	16.945	1.257
11.761	14.182	17.297	1.184
11.769	13.673	17.141	1.162
11.776	14.741	17.595	1.218
11.783	15.103	18.177	1.237
11.79	14.943	17.387	1.16
11.797	15.19	17.395	1.308
11.804	13.783	16.761	1.196
11.812	13.644	17.732	1.204
11.819	13.62	16.907	1.222
11.826	13.472	16.976	1.211
11.833	14.708	16.412	1.197
11.84	13.294	16.486	1.133
11.847	14.027	16.394	1.11
11.854	14.534	17.359	1.192
11.862	14.879	16.385	1.214
11.869	15.294	16.64	1.197
11.876	14.901	16.993	1.219
11.883	14.91	17.331	1.185
11.89	14.284	16.342	1.242
11.897	15.894	17.116	1.247
11.904	17.033	17.178	1.175
11.912	14.855	17.015	1.199
11.919	14.692	16.584	1.154
11.926	16.02	17.142	1.182
11.933	14.986	16.584	1.177
11.94	15.722	18.906	1.163
11.947	16.242	17.347	1.218
11.955	15.98	16.403	1.249
11.962	16.187	16.336	1.132
11.969	16.489	16.387	1.158
11.976	17.215	16.24	1.16
11.983	17.33	16.089	1.183
11.99	16.808	16.985	1.152
11.997	16.636	16.341	1.129
12.005	16.861	15.466	1.305
12.012	15.634	15.585	1.131
12.019	15.403	14.09	1.117
12.026	16.649	15.566	1.165
12.033	16.268	14.268	1.119
12.04	16.625	14.311	1.128
12.047	16.7	13.715	1.075
12.055	17.344	14.658	1.186
12.062	16.162	14.143	1.128
12.069	17.315	13.412	1.135
12.076	17.799	14.681	1.136
12.083	18.794	13.646	1.138
12.09	17.848	12.525	1.109
12.098	18.447	12.832	1.118
12.105	19.899	13.183	1.311
12.112	21.781	13.356	1.226
12.119	20.454	12.655	1.245
12.126	19.872	13.226	1.106
12.133	22.362	12.411	1.236
12.14	21.814	12.825	1.191
12.148	21.721	11.162	1.159
12.155	23.768	12.936	1.217
12.162	22.288	11.017	1.181
12.169	25.949	12.366	1.306
12.176	24.885	11.216	1.311
12.183	25.152	10.592	1.309
12.19	27.069	10.285	1.268
12.198	28.915	11.329	1.359
12.205	28.569	10.441	1.356
12.212	29.713	10.337	1.366
12.219	30.892	9.923	1.376
12.226	31.567	10.802	1.373
12.233	30.527	9.718	1.371
12.24	33.274	10.216	1.445
12.248	31.958	9.99	1.43
12.255	33.604	9.81	1.573
12.262	31.793	8.896	1.392
12.269	34.079	9.256	1.434
12.276	35.084	9.902	1.47
12.283	35.235	9.349	1.447
12.291	35.182	9.426	1.474
12.298	35.266	9.144	1.457
12.305	34.328	9.091	1.5
12.312	34.479	9.147	1.449
12.319	33.616	9.182	1.524
12.326	35.732	9.214	1.619
12.333	35.722	8.829	1.467
12.341	35.052	8.975	1.517
12.348	33.806	8.767	1.466
12.355	34.397	8.817	1.491
12.362	33.977	9.009	1.436
12.369	34.574	8.685	1.423
12.376	32.789	8.969	1.396
12.383	34.015	9	1.422
12.391	34.259	9.821	1.436
12.398	33.239	9.65	1.442
12.405	33.435	9.583	1.486
12.412	31.882	9.288	1.388
12.419	32.416	9.968	1.409
12.426	30.072	9.638	1.296
12.434	29.735	9.654	1.354
12.441	29.856	10.177	1.334
12.448	29.564	10.045	1.352
12.455	30.665	10.641	1.365
12.462	28.741	10.815	1.349
12.469	29.221	11.259	1.309
12.476	29.156	11.688	1.339
12.484	26.458	11.446	1.302
12.491	28.933	11.575	1.258
12.498	25.183	11.989	1.305
12.505	25.216	12.597	1.3
12.512	24.19	12.583	1.24
12.519	23.394	12.913	1.241
12.526	23.036	13.23	1.222
12.534	21.954	13.867	1.206
12.541	22.159	15.009	1.234
12.548	21.325	14.253	1.23
12.555	21.314	14.602	1.207
12.562	19.975	13.784	1.151
12.569	19.453	14.913	1.185
12.577	19.128	15.111	1.265
12.584	18.197	14.749	1.189
12.591	19.062	15.532	1.192
12.598	18.666	16.423	1.183
12.605	17.601	16.127	1.149
12.612	16.718	15.346	1.107
12.619	17.668	16.313	1.108
12.627	17.336	16.055	1.134
12.634	16.81	16.301	1.19
12.641	16.854	16.889	1.155
12.648	17.5	16.384	1.143
12.655	17.682	16.76	1.154
12.662	16.143	16.718	1.138
12.669	15.763	16.808	1.152
12.677	16.196	16.878	1.193
12.684	16.143	16.833	1.162
12.691	16.087	17.386	1.22
12.698	16.317	17.994	1.168
12.705	16.239	17.293	1.179
12.712	16.327	17.622	1.289
12.72	16.593	18.807	1.206
12.727	15.723	18.512	1.177
12.734	16.474	18.148	1.218
12.741	14.923	17.521	1.108
12.748	16.43	18.883	1.212
12.755	16.188	19.848	1.221
12.762	15.298	18.083	1.118
12.77	15.774	19.147	1.224
12.777	15.864	19.571	1.205
12.784	15.813	18.358	1.201
12.791	16.037	18.52	1.188
12.798	15.691	18.423	1.18
12.805	16.832	18.929	1.15
12.812	17.191	18.879	1.248
12.82	16.255	19.038	1.164
12.827	15.596	19.404	1.296
12.834	16.23	19.799	1.225
12.841	15.19	20.305	1.2
12.848	18.754	19.446	1.118
12.855	15.665	20.041	1.207
12.863	15.715	20.154	1.249
12.87	14.913	19.013	1.127
12.877	14.622	19.142	1.11
12.884	15.668	20.365	1.181
12.891	15.522	20.801	1.2
12.898	15.244	19.749	1.16
12.905	14.37	18.532	1.068
12.913	15.289	21.268	1.187
12.92	15.333	19.918	1.171
12.927	15.722	20.571	1.106
12.934	15.658	21.839	1.176
12.941	15.206	21.045	1.12
12.948	16.169	19.811	1.191
12.955	15.581	19.682	1.135
12.963	15.237	19.925	1.152
12.97	14.843	19.598	1.145
12.977	14.434	18.947	1.128
12.984	15.572	20.033	1.154
12.991	15.121	19.384	1.11
12.998	14.847	20.108	1.142
13.006	13.845	17.694	1.061
13.013	14.181	18.034	1.141
13.02	13.654	17.853	1.085
13.027	14.141	18.333	1.149
13.034	14.721	18.764	1.122
13.041	14.896	17.636	1.089
13.048	14.138	18.815	1.08
13.056	14.181	17.474	1.217
13.063	14.637	17.446	1.122
13.07	13.784	16.705	1.097
13.077	14.286	16.827	1.12
13.084	14.276	16.292	1.093
13.091	13.972	16.892	1.102
13.098	14.094	16.548	1.111
13.106	14.444	16.293	1.114
13.113	13.661	16.114	1.071
13.12	13.757	15.987	1.08
13.127	14.013	16.093	1.127
13.134	14.312	17.327	1.119
13.141	13.673	17.295	1.117
13.149	13.455	15.613	1.123
13.156	11.885	13.994	1.003
13.163	14.171	17.208	1.176
13.17	13.391	16.069	1.178
13.177	13.223	15.824	1.116
13.184	13.159	16.069	1.121
13.191	13.172	16.156	1.181
13.199	13.413	15.903	1.159
13.206	13.564	17.489	1.137
13.213	12.874	15.747	1.14
13.22	12.339	15.736	1.086
13.227	13.125	16.908	1.17
13.234	13.558	16.442	1.193
13.241	13.613	16.876	1.2
13.249	13.315	17.216	1.188
13.256	13.295	17.517	1.165
13.263	13.139	17.485	1.182
13.27	12.383	16.56	1.119
13.277	12.827	17.365	1.183
13.284	12.871	16.602	1.138
13.292	13.164	17.27	1.139
13.299	13.495	17.947	1.206
13.306	13.179	19.73	1.181
13.313	13.175	18.803	1.196
13.32	12.82	17.922	1.183
13.327	12.734	17.857	1.169
13.334	12.488	18.89	1.206
13.342	13.019	18.615	1.213
13.349	12.955	18.348	1.18
13.356	13.56	18.866	1.169
13.363	13.727	19.029	1.218
13.37	13.136	18.691	1.168
13.377	13.373	18.494	1.189
13.384	13.976	18.805	1.254
13.392	14.355	20.193	1.195
13.399	14.482	18.861	1.177
13.406	14.574	18.26	1.13
13.413	13.697	17.267	1.083
13.42	15.916	20.092	1.22
13.427	15.729	19.721	1.197
13.435	16.146	18.548	1.19
13.442	15.932	18.479	1.194
13.449	16.704	19.282	1.245
13.456	15.563	17.681	1.118
13.463	16.343	18.721	1.154
13.47	18.3	19.126	1.179
13.477	17.738	18.852	1.179
13.485	17.181	18.643	1.205
13.492	17.351	19.264	1.205
13.499	17.217	18.852	1.216
13.506	17.555	18.608	1.104
13.513	18.268	18.609	1.193
13.52	17.798	19.291	1.247
13.527	18.371	18.835	1.213
13.535	18.383	18.464	1.174
13.542	19.128	18.931	1.227
13.549	18.565	18.396	1.177
13.556	18.711	19.578	1.149
13.563	19.464	18.263	1.217
13.57	20.144	17.618	1.19
13.578	18.749	18.082	1.169
13.585	19.359	18.573	1.213
13.592	18.74	18.07	1.193
13.599	18.302	17.455	1.126
13.606	19.2	18.603	1.182
13.613	19.981	18.489	1.208
13.62	19.068	18.457	1.191
13.628	19.679	18.81	1.221
13.635	19.732	18.282	1.218
13.642	19.115	18.799	1.161
13.649	20.462	20.195	1.21
13.656	18.436	17.966	1.196
13.663	19.742	18.39	1.198
13.67	19.307	18.914	1.157
13.678	19.248	19.252	1.195
13.685	19.564	18.083	1.185
13.692	18.061	17.904	1.131
13.699	17.622	17.891	1.173
13.706	18.686	17.773	1.159
13.713	17.305	19.793	1.203
13.721	17.594	18.251	1.187
13.728	16.957	17.249	1.081
13.735	17.546	16.996	1.168
13.742	16.818	17.71	1.233
13.749	16.52	18.442	1.184
13.756	17.307	18.476	1.159
13.763	15.713	18.417	1.163
13.771	15.335	17.58	1.141
13.778	15.242	17.67	1.152
13.785	14.579	17.072	1.107
13.792	14.837	18.384	1.164
13.799	14.927	18.244	1.223
13.806	14.47	18.214	1.163
13.813	13.827	15.588	1.05
13.821	14.325	17.253	1.122
13.828	13.881	17.871	1.114
13.835	14.686	17.633	1.22
13.842	14.041	17.853	1.172
13.849	14.54	18.637	1.188
13.856	15.027	18.32	1.153
13.864	14.171	18.597	1.14
13.871	13.794	18.836	1.203
13.878	14.196	19.28	1.296
13.885	13.703	18.14	1.169
13.892	13.229	17.315	1.138
13.899	13.342	17.673	1.145
13.906	13.853	18.398	1.173
13.914	13.578	18.676	1.18
13.921	13.574	18.442	1.177
13.928	13.024	17.691	1.182
13.935	13.461	18.386	1.263
13.942	13.449	17.932	1.214
13.949	13.385	18.64	1.221
13.956	13.554	18.906	1.184
13.964	12.807	18.225	1.154
13.971	14.654	19.66	1.164
13.978	12.638	18.378	1.137
13.985	12.852	19.032	1.151
13.992	12.807	18.013	1.133
13.999	12.204	17.852	1.114
14.006	13.028	18.751	1.157
14.014	11.964	17.488	1.081
14.021	12.421	18.19	1.143
14.028	13.625	20.509	1.183
14.035	12.655	19.338	1.125
14.042	12.531	18.271	1.201
14.049	12.436	18.294	1.15
14.057	12.61	17.956	1.116
14.064	12.911	18.736	1.172
14.071	12.399	18.53	1.184
14.078	12.394	18.037	1.146
14.085	12.109	18.222	1.136
14.092	12.009	19.05	1.183
14.099	12.382	18.988	1.162
14.107	12.265	18.698	1.145
14.114	12.469	18.034	1.19
14.121	14.343	17.862	1.152
14.128	12.723	17.804	1.206
14.135	12.482	18.462	1.174
14.142	12.505	18.238	1.175
14.15	12.38	18.527	1.242
14.157	12.333	18.926	1.183
14.164	12.404	17.656	1.229
14.171	11.869	17.616	1.207
14.178	12.134	17.504	1.176
14.185	12.702	18.178	1.212
14.192	12.469	17.478	1.215
14.2	12.441	17.039	1.18
14.207	12.024	16.918	1.174
14.214	12.397	16.864	1.244
14.221	12.137	16.704	1.136
14.228	12.127	16.646	1.177
14.235	12.23	16.745	1.174
14.242	12.094	16.919	1.184
14.25	12.915	18.431	1.221
14.257	12.567	16.64	1.187
14.264	13.878	17.013	1.186
14.271	13.238	17.686	1.265
14.278	13.47	17.006	1.26
14.285	13.198	16.509	1.154
[truncated: 787 more rows]

## Sheet: 17R
Distance from commissure [mm]	Mg/Ca [mmol/mol]	Na/Ca [mmol/mol]	Sr/Ca [mmol/mol]
1.659e-09	21.99	13.537	1.119
0.007	21.75	13.789	1.125
0.014	21.934	14.447	1.116
0.021	22.031	14.19	1.109
0.029	21.711	13.59	1.129
0.036	20.762	14.455	1.156
0.043	21.061	13.274	1.123
0.05	20.589	13.358	1.139
0.057	20.229	14.233	1.155
0.064	20.297	13.291	1.104
0.071	19.695	13.972	1.129
0.079	20.887	13.429	1.103
0.086	18.65	13.094	1.108
0.093	18.989	13.207	1.112
0.1	18.867	13.128	1.098
0.107	18.493	13.121	1.111
0.114	18.354	12.682	1.106
0.122	18.098	13.18	1.13
0.129	18.052	13.388	1.111
0.136	18.933	13.466	1.144
0.143	17.817	13.208	1.124
0.15	17.425	13.444	1.125
0.157	16.836	12.89	1.094
0.164	16.817	13.309	1.125
0.172	16.633	13.6	1.118
0.179	16.055	13.498	1.133
0.186	15.88	13.572	1.107
0.193	14.652	12.909	1.062
0.2	15.292	13.79	1.121
0.207	15.088	13.836	1.107
0.214	15.066	13.538	1.13
0.222	14.456	13.58	1.117
0.229	14.702	14.039	1.122
0.236	14.622	14.297	1.113
0.243	14.714	14.517	1.101
0.25	15.141	14.483	1.117
0.257	14.413	14.633	1.158
0.265	14.68	14.266	1.112
0.272	14.493	14.451	1.12
0.279	14.731	14.674	1.122
0.286	15.091	14.822	1.144
0.293	14.49	14.37	1.127
0.3	14.397	14.778	1.122
0.307	14.504	14.983	1.115
0.315	14.529	14.79	1.129
0.322	14.412	15.061	1.134
0.329	14.612	14.668	1.137
0.336	14.679	14.671	1.13
0.343	14.71	15.099	1.139
0.35	14.697	15.157	1.173
0.357	14.731	14.645	1.126
0.365	14.765	15.128	1.156
0.372	14.568	15.122	1.174
0.379	14.635	14.886	1.161
0.386	14.472	14.995	1.155
0.393	14.282	14.865	1.15
0.4	14.225	14.841	1.164
0.408	14.1	15.216	1.171
0.415	14.226	15.205	1.157
0.422	13.812	15.327	1.161
0.429	13.828	15.453	1.161
0.436	13.558	15.305	1.129
0.443	13.792	15.828	1.172
0.45	13.425	15.861	1.202
0.458	13.352	15.738	1.157
0.465	13.07	15.538	1.168
0.472	12.942	15.776	1.17
0.479	12.772	16.074	1.151
0.486	12.516	15.982	1.163
0.493	12.775	15.759	1.194
0.5	12.668	15.65	1.2
0.508	12.572	15.415	1.154
0.515	12.897	16.084	1.163
0.522	12.415	15.306	1.168
0.529	12.664	16.138	1.183
0.536	12.683	15.307	1.139
0.543	12.453	16.277	1.178
0.551	12.562	15.669	1.184
0.558	12.117	16.736	1.174
0.565	12.538	15.879	1.158
0.572	12.518	16.212	1.173
0.579	12.263	15.869	1.148
0.586	12.521	17.515	1.243
0.593	12.66	16.326	1.218
0.601	12.747	16.579	1.188
0.608	11.817	15.631	1.131
0.615	12.469	16.094	1.183
0.622	12.507	16.052	1.185
0.629	12.245	16.352	1.175
0.636	12.614	15.946	1.225
0.643	12.567	16.737	1.217
0.651	12.547	16.343	1.19
0.658	12.566	16.464	1.242
0.665	12.394	16.739	1.242
0.672	12.198	16.729	1.232
0.679	12.622	16.998	1.24
0.686	13.004	17.529	1.227
0.694	11.315	15.485	1.161
0.701	11.959	17.179	1.242
0.708	12.124	18.745	1.287
0.715	12.019	19.046	1.258
0.722	12.467	17.085	1.228
0.729	11.581	17.844	1.242
0.736	12.416	17.791	1.3
0.744	12.263	17.533	1.265
0.751	11.802	18.615	1.258
0.758	12.001	18.179	1.222
0.765	12.068	18.054	1.283
0.772	11.592	17.54	1.205
0.779	11.931	18.035	1.31
0.786	11.665	17.404	1.255
0.794	11.847	17.593	1.307
0.801	11.993	18.565	1.316
0.808	12.584	18.135	1.313
0.815	11.775	18.443	1.286
0.822	11.283	17.736	1.27
0.829	12.18	18.253	1.306
0.837	10.645	17.084	1.169
0.844	11.708	17.751	1.322
0.851	11.422	20.126	1.286
0.858	11.689	17.822	1.318
0.865	11.503	18.702	1.335
0.872	11.602	18.619	1.305
0.879	12.335	18.266	1.286
0.887	11.702	18.446	1.381
0.894	11.483	18.413	1.319
0.901	10.884	16.449	1.261
0.908	11.239	17.227	1.281
0.915	11.606	18.015	1.33
0.922	11.053	16.903	1.258
0.929	11.338	17.183	1.272
0.937	11.433	17.724	1.294
0.944	11.105	17.05	1.39
0.951	11.528	17.77	1.321
0.958	11.088	17.248	1.306
0.965	11.097	17.131	1.272
0.972	11.476	17.342	1.334
0.98	11.91	17.79	1.355
0.987	11.711	17.096	1.309
0.994	13.142	17.363	1.335
1.001	12.217	18.312	1.316
1.008	12.856	18.098	1.334
1.015	12.135	16.679	1.339
1.022	12.158	17.156	1.321
1.03	12.103	18.133	1.276
1.037	12.528	17.66	1.279
1.044	12.666	17.791	1.306
1.051	12.494	17.617	1.319
1.058	11.898	16.975	1.248
1.065	12.588	17.394	1.273
1.072	12.579	18.056	1.259
1.08	13.224	17.524	1.27
1.087	13.376	17.826	1.21
1.094	13.156	17.34	1.261
1.101	12.999	16.765	1.229
1.108	13.454	16.722	1.211
1.115	13.761	16.62	1.233
1.123	14.117	16.436	1.23
1.13	14.329	16.915	1.242
1.137	14.049	16.237	1.226
1.144	14.337	16.231	1.237
1.151	14.31	16.236	1.257
1.158	14.543	16.097	1.22
1.165	14.433	16.975	1.227
1.173	15.669	16.174	1.218
1.18	14.592	16.011	1.222
1.187	16.022	17.265	1.317
1.194	15.88	16.325	1.259
1.201	14.156	15.459	1.169
1.208	14.441	15.163	1.172
1.215	13.669	15.191	1.08
1.223	14.613	15.728	1.171
1.23	15.578	15.883	1.242
1.237	14.887	14.876	1.176
1.244	15.452	15.669	1.213
1.251	15.694	17.68	1.272
1.258	16.022	15.993	1.207
1.266	15.875	15.576	1.263
1.273	16.129	16.266	1.246
1.28	16.736	16.765	1.221
1.287	15.61	14.954	1.19
1.294	17.211	16.124	1.369
1.301	20.103	16.882	1.251
1.308	15.869	15.224	1.181
1.316	16.746	15.769	1.285
1.323	16.945	16.682	1.265
1.33	17.206	16.608	1.288
1.337	16.807	16.209	1.291
1.344	17.056	17.584	1.307
1.351	17.189	16.358	1.312
1.358	16.584	15.377	1.242
1.366	16.928	17.286	1.23
1.373	17.277	16.792	1.22
1.38	17.713	17.065	1.269
1.387	18.135	16.585	1.328
1.394	18.433	17.124	1.484
1.401	18.098	17.739	1.289
1.409	17.826	15.802	1.242
1.416	16.236	15.065	1.2
1.423	17.273	15.75	1.286
1.43	17.32	16.522	1.255
1.437	17.726	16.75	1.4
1.444	17.042	17.014	1.216
1.451	17.581	16.686	1.407
1.459	17.694	15.8	1.303
1.466	17.155	16.798	1.286
1.473	16.244	16.342	1.21
1.48	17.095	17.225	1.37
1.487	17.879	17.879	1.283
1.494	16.853	16.064	1.222
1.501	16.765	15.649	1.297
1.509	17.331	15.248	1.283
1.516	16.279	16.367	1.347
1.523	16.597	16.087	1.255
1.53	18.3	15.354	1.394
1.537	17.426	15.756	1.271
1.544	16.859	15.048	1.262
1.552	17.348	15.629	1.291
1.559	18.207	15.802	1.27
1.566	16.77	14.771	1.208
1.573	18.792	15.388	1.267
1.58	17.614	14.826	1.239
1.587	17.248	14.883	1.249
1.594	17.322	16.383	1.16
1.602	17.791	14.705	1.295
1.609	19.645	15.148	1.329
1.616	16.785	15.505	1.136
1.623	17.801	14.814	1.154
1.63	18.392	15.682	1.235
1.637	18.321	13.794	1.163
1.644	18.751	15.519	1.139
1.652	19.513	15.639	1.184
1.659	18.315	14.038	1.205
1.666	22.339	15.799	1.158
1.673	21.092	15.204	1.116
1.68	22.106	14.209	1.134
1.687	20.748	13.725	1.053
1.694	22.222	14.512	1.151
1.702	24.159	14.542	1.157
1.709	26.891	13.499	1.184
1.716	24.301	13.592	1.206
1.723	23.368	12.676	1.152
1.73	23.02	12.579	1.087
1.737	24.862	12.553	1.14
1.745	25.945	12.621	1.147
1.752	25.212	12.961	1.21
1.759	27.269	12.798	1.306
1.766	24.337	12.451	1.058
1.773	27.203	12.905	1.342
1.78	25.723	12.752	1.121
1.787	26.037	11.732	1.149
1.795	26.241	12.466	1.312
1.802	25.973	13.142	1.161
1.809	27.114	12.591	1.218
1.816	26.491	12.743	1.156
1.823	24.356	11.569	1.19
1.83	27.214	13.019	1.206
1.838	24.902	12.224	1.189
1.845	27.843	12.738	1.205
1.852	25.977	12.723	1.207
1.859	25.043	12.734	1.255
1.866	23.091	12.521	1.18
1.873	25.449	13.25	1.293
1.88	23.004	13.094	1.162
1.888	22.041	11.83	1.095
1.895	24.36	13.091	1.176
1.902	21.226	12.117	1.234
1.909	20.883	12.406	1.095
1.916	20.381	13.214	1.129
1.923	22.26	13.283	1.147
1.93	22.173	13.991	1.113
1.938	19.27	11.961	1.089
1.945	19.995	12.424	1.063
1.952	21.451	12.533	1.065
1.959	20.887	12.501	1.078
1.966	20.437	13.417	1.069
1.973	20.748	15.197	1.077
1.981	21.831	12.653	1.053
1.988	20.95	12.15	1.052
1.995	24.487	12.582	1.073
2.002	21.587	13.526	1.142
2.009	23.027	12.593	1.144
2.016	24.545	12.472	1.116
2.023	23.867	12.882	1.102
2.031	26.212	12.329	1.093
2.038	24.988	12.151	1.118
2.045	26.817	12.383	1.124
2.052	25.844	12.798	1.152
2.059	27.16	12.233	1.138
2.066	24.267	12.081	1.026
2.073	25.592	13.021	1.09
2.081	26.777	12.54	1.077
2.088	28.125	11.704	1.083
2.095	30.4	12.72	1.194
2.102	25.352	13.071	1.204
2.109	27.926	12.838	1.281
2.116	28.662	12.33	1.074
2.123	26.931	11.7	1.177
2.131	27.604	12.474	1.181
2.138	26.134	10.703	1.04
2.145	26.972	12.692	1.246
2.152	26.192	11.65	1.125
2.159	25.914	12.636	1.136
2.166	26.733	12.264	1.159
2.174	29.929	11.291	1.131
2.181	26.327	11.397	1.261
2.188	27.422	11.898	1.198
2.195	24.89	12.117	1.166
2.202	27.611	12.484	1.215
2.209	26.215	11.887	1.164
2.216	22.507	10.834	1.168
2.224	22.537	11.855	1.211
2.231	22.362	11.021	1.122
2.238	20.75	11.818	1.157
2.245	21.663	12.02	1.08
2.252	22.561	11.689	1.109
2.259	21.597	11.849	1.098
2.266	24.057	11.904	1.116
2.274	20.739	11.808	1.139
2.281	20.764	11.768	1.111
2.288	20.43	12.745	1.183
2.295	19.86	12.147	1.106
2.302	19.249	11.669	1.046
2.309	19.89	11.864	1.17
2.317	19.716	13.73	1.209
2.324	18.647	12.7	1.155
2.331	18.607	12.097	1.158
2.338	19.422	13.28	1.193
2.345	18.079	11.154	0.988
2.352	19.6	13.116	1.074
2.359	19.636	12.38	1.149
2.367	19.464	14.24	1.102
2.374	18.278	12.606	1.124
2.381	18.788	13.125	1.095
2.388	18.664	13.741	1.195
2.395	18.823	13.231	1.184
2.402	17.103	13.771	1.108
2.409	18.761	13.337	1.088
2.417	18.486	13.554	1.167
2.424	18.336	13.679	1.178
2.431	17.563	14.128	1.116
2.438	16.416	13.984	1.109
2.445	19.683	14.771	1.157
2.452	17.126	14.482	1.235
2.46	16.827	14.046	1.133
2.467	16.767	14.328	1.095
2.474	17.47	14.234	1.124
2.481	17.035	14.324	1.11
2.488	16.491	14.798	1.142
2.495	15.62	13.957	1.109
2.502	19.097	14.804	1.136
2.51	15.916	14.579	1.074
2.517	15.517	14.671	1.074
2.524	15.218	14.613	1.052
2.531	16.241	15.182	1.108
2.538	15.736	15.986	1.087
2.545	15.105	14.25	1.08
2.552	15.741	14.954	1.121
2.56	15.175	14.69	1.071
2.567	15.811	17.856	1.081
2.574	15.69	16.991	1.121
2.581	14.723	15.595	1.102
2.588	14.687	14.599	1.049
2.595	13.717	13.167	0.973
2.603	15.02	15.528	1.082
2.61	13.59	15.859	1.096
2.617	13.453	15.944	1.109
2.624	13.078	14.297	1.072
2.631	13.687	16.509	1.077
2.638	12.923	16.03	1.061
2.645	12.987	15.01	1.053
2.653	13.354	15.919	1.077
2.66	12.729	15.647	1.127
2.667	13.222	15.907	1.082
2.674	12.912	15.456	1.05
2.681	12.656	15.247	1.052
2.688	14.456	15.268	1.075
2.695	14.504	14.98	1.095
2.703	12.971	16.449	1.053
2.71	14.012	15.159	1.062
2.717	14.143	14.827	1.075
2.724	14.538	16.272	1.067
2.731	13.888	15.605	1.075
2.738	13.733	14.01	1.025
2.746	14.242	15.21	1.053
2.753	13.983	16.427	1.116
2.76	14.314	15.428	1.095
2.767	14.119	16.497	1.159
2.774	13.939	14.497	1.124
2.781	14.45	15.017	1.066
2.788	15.58	15.325	1.082
2.796	14.796	14.62	1.083
2.803	13.338	13.804	1.043
2.81	13.888	14.645	1.098
2.817	14.998	15.577	1.119
2.824	13.672	14.652	1.06
2.831	12.789	13.947	1.008
2.838	13.862	15.586	1.074
2.846	13.927	15.98	1.08
2.853	14.989	14.918	1.158
2.86	13.685	15.306	1.087
2.867	14.195	16.025	1.141
2.874	14.006	14.882	1.093
2.881	14.573	15.574	1.089
2.889	13.529	14.368	1.035
2.896	13.303	13.888	1.043
2.903	14.401	15.405	1.113
2.91	13.857	15.493	1.14
2.917	14.015	15.57	1.067
2.924	13.602	14.814	1.098
2.931	13.595	15.313	1.094
2.939	14.468	15.321	1.099
2.946	13.904	15.571	1.195
2.953	13.902	16.602	1.092
2.96	14.853	15.224	1.1
2.967	12.723	14.817	1.007
2.974	13.618	15.218	1.081
2.981	13.498	15.376	1.102
2.989	14.018	15.606	1.167
2.996	13.749	15.047	1.141
3.003	13.797	15.816	1.073
3.01	13.874	15.115	1.068
3.017	13.995	15.439	1.081
3.024	13.966	15.724	1.116
3.032	13.78	15.071	1.119
3.039	14.585	15.229	1.129
3.046	13.722	16.855	1.105
3.053	13.546	15.411	1.075
3.06	14.913	15.045	1.095
3.067	13.387	15.73	1.18
3.074	13.323	15.08	1.068
3.082	13.321	14.52	1.06
3.089	14.245	15.62	1.105
3.096	13.464	14.941	1.117
3.103	12.992	14.768	1.079
3.11	14.293	15.764	1.1
3.117	12.77	14.311	1.065
3.124	12.565	14.41	1.048
3.132	13.13	15.26	1.115
3.139	12.887	14.683	1.077
3.146	12.127	14.481	1.015
3.153	13.306	15.613	1.104
3.16	13.371	15.132	1.153
3.167	12.15	14.174	1.078
3.175	12.821	15.863	1.105
3.182	12.986	15.326	1.086
3.189	12.716	14.763	1.037
3.196	12.622	15.62	1.087
3.203	12.389	14.886	1.079
3.21	12.369	15.278	1.13
3.217	12.537	15.542	1.077
3.225	12.575	15.528	1.096
3.232	12.619	16.862	1.099
3.239	11.815	15.213	1.057
3.246	12.398	16.31	1.101
3.253	12.052	15.898	1.14
3.26	11.917	15.586	1.039
3.267	12.33	15.927	1.106
3.275	11.977	15.676	1.044
3.282	12.461	15.877	1.103
3.289	12.253	17.821	1.102
3.296	11.439	15.161	1.032
3.303	11.872	15.818	1.11
3.31	11.427	15.186	1.089
3.318	11.359	15.157	1.036
3.325	11.32	15.565	1.195
3.332	11.301	14.834	1.061
3.339	11	15.616	1.035
3.346	11.707	15.665	1.127
3.353	11.371	15.835	1.076
3.36	11.535	16.182	1.101
3.368	11.136	15.511	1.076
3.375	11.242	15.497	1.067
3.382	10.947	14.83	1.038
3.389	10.838	15.392	1.07
3.396	11.349	15.277	1.086
3.403	10.856	15.078	1.054
3.41	11.156	14.874	1.084
3.418	11.296	15.154	1.038
3.425	11.043	15.288	1.042
3.432	11.268	15.311	1.085
3.439	11.176	15.887	1.04
3.446	11.003	15.11	1.061
3.453	11.599	15.735	1.079
3.461	10.204	14.8	0.991
3.468	11.012	15.187	1.086
3.475	10.772	14.705	1.065
3.482	11.725	15.19	1.067
3.489	11.129	14.992	1.04
3.496	10.556	15.145	1.077
3.503	10.939	15.264	1.058
3.511	10.375	15.161	1.02
3.518	10.598	15.324	1.075
3.525	10.812	16.025	1.079
3.532	10.479	18.365	1.09
3.539	10.872	15.558	1.067
3.546	10.395	15.297	1.072
3.553	10.079	15.303	1.061
3.561	10.347	15.649	1.076
3.568	10.093	15.653	1.068
3.575	10.448	15.947	1.095
3.582	10.453	15.81	1.082
3.589	10.673	15.965	1.135
3.596	10.337	15.98	1.112
3.604	10.016	15.889	1.096
3.611	11.237	16.168	1.132
3.618	10.357	16.403	1.12
3.625	10.364	16.281	1.098
3.632	10.268	16.555	1.147
3.639	10.029	16.661	1.087
3.646	10.101	15.589	1.103
3.654	9.987	16.545	1.105
3.661	10.514	16.947	1.142
3.668	10.185	16.732	1.143
3.675	10.135	16.257	1.15
3.682	9.92	16.202	1.1
3.689	9.832	15.901	1.061
3.696	10.061	16.542	1.105
3.704	9.688	16.299	1.103
3.711	10.111	16.923	1.113
3.718	10.129	16.939	1.133
3.725	9.771	16.934	1.076
3.732	10.025	17.99	1.107
3.739	10.055	18.235	1.124
3.747	10.118	17.947	1.119
3.754	10.199	18.119	1.176
3.761	9.955	18.006	1.133
3.768	10.081	17.675	1.1
3.775	9.789	17.669	1.096
3.782	10.175	18.799	1.133
3.789	10.145	18.362	1.111
3.797	9.149	16.399	1.023
3.804	9.997	17.976	1.122
3.811	9.91	18.252	1.125
3.818	9.781	18.044	1.106
3.825	9.737	18.036	1.091
3.832	9.861	18.168	1.15
3.839	9.744	18.534	1.11
3.847	9.915	18.533	1.116
3.854	9.817	18.416	1.097
3.861	10.037	18.669	1.101
3.868	9.678	18.298	1.096
3.875	9.752	17.755	1.059
3.882	10.091	19.378	1.116
3.889	9.858	18.716	1.101
3.897	9.769	18.167	1.094
3.904	9.811	19.695	1.1
3.911	9.648	18.619	1.092
3.918	9.865	18.846	1.07
3.925	9.55	17.728	1.077
3.932	9.826	18.346	1.117
3.94	9.892	18.282	1.086
3.947	9.398	18.088	1.113
3.954	9.521	17.911	1.085
3.961	9.808	18.804	1.116
3.968	9.443	17.678	1.091
3.975	9.646	19.511	1.076
3.982	9.613	17.866	1.1
3.99	9.434	17.498	1.074
3.997	9.754	18.821	1.112
4.004	9.406	18.173	1.1
4.011	9.572	18.292	1.086
4.018	9.989	18.984	1.097
4.025	9.647	18.208	1.051
4.033	9.678	17.514	1.084
4.04	10.022	17.453	1.08
4.047	9.476	17.362	1.101
4.054	9.432	17.094	1.088
4.061	9.657	20.814	1.096
4.068	9.574	17.251	1.08
4.075	9.804	17.286	1.085
4.083	9.831	18.307	1.103
4.09	9.776	17.855	1.095
4.097	9.989	17.574	1.108
4.104	9.755	17.152	1.084
4.111	9.901	18.208	1.095
4.118	9.889	17.182	1.115
4.125	9.974	17.725	1.176
4.133	9.87	18.286	1.106
4.14	9.612	16.896	1.09
4.147	10.002	16.931	1.08
4.154	9.746	16.733	1.097
4.161	9.701	16.52	1.078
4.168	9.876	16.822	1.112
4.175	9.606	16.544	1.069
4.183	10.1	17.172	1.102
4.19	10.143	17.5	1.143
4.197	9.604	16.576	1.084
4.204	9.712	16.433	1.104
4.211	9.891	16.539	1.1
4.218	10.21	17.411	1.121
4.226	9.609	16.448	1.069
4.233	9.749	16.478	1.093
4.24	10.103	17.011	1.111
4.247	9.753	17.213	1.099
4.254	9.728	16.802	1.091
4.261	10.265	17.519	1.155
4.268	9.982	17.335	1.097
4.276	9.914	17.031	1.116
4.283	9.747	16.864	1.101
4.29	9.829	17.297	1.118
4.297	9.589	17.23	1.102
4.304	9.671	16.707	1.115
4.311	9.866	17.23	1.174
4.318	9.522	17.087	1.149
4.326	9.585	17.377	1.124
4.333	9.556	17.576	1.091
4.34	9.598	17.214	1.092
4.347	9.999	17.315	1.101
4.354	9.706	17.785	1.111
4.361	9.515	17.826	1.097
4.369	9.566	18.088	1.181
4.376	9.471	17.572	1.105
4.383	9.231	17.095	1.109
4.39	8.999	16.993	1.089
4.397	9.466	17.274	1.099
4.404	9.288	19.166	1.079
4.411	8.961	16.863	1.082
4.419	9.455	17.524	1.137
4.426	9.526	17.391	1.14
4.433	9.258	17.658	1.109
4.44	9.798	17.292	1.136
4.447	9.648	17.558	1.13
4.454	9.579	21.73	1.122
4.461	9.59	17.29	1.108
4.469	9.738	17.593	1.105
4.476	9.603	18.51	1.094
4.483	9.231	17.019	1.108
4.49	9.581	17.847	1.127
4.497	9.433	18.163	1.102
4.504	9.319	17.586	1.108
4.512	9.508	17.642	1.11
4.519	9.304	17.197	1.083
4.526	9.814	17.298	1.157
4.533	9.283	17.056	1.085
4.54	9.535	18.063	1.1
4.547	9.558	16.627	1.076
4.554	9.472	16.953	1.094
4.562	9.794	17.266	1.118
4.569	9.789	17.503	1.088
4.576	9.89	17.283	1.101
4.583	10.163	17.454	1.124
4.59	9.935	16.942	1.108
4.597	11.038	17.787	1.152
4.604	9.969	17.121	1.096
4.612	10.21	17.586	1.192
4.619	10.605	17.165	1.109
4.626	9.94	17.375	1.112
4.633	10.337	17.56	1.156
4.64	9.907	16.513	1.195
4.647	9.535	16.321	1.086
4.655	10.351	17.348	1.121
4.662	9.991	16.509	1.113
4.669	10.009	16.461	1.15
4.676	10.123	16.98	1.12
4.683	9.948	16.254	1.098
4.69	9.548	16.208	1.105
4.697	9.242	15.528	1.042
4.705	10.38	17.075	1.111
4.712	10.295	17.116	1.19
4.719	9.831	16.561	1.132
4.726	10.195	16.712	1.111
4.733	10.022	16.64	1.171
4.74	10.286	16.814	1.124
4.747	10.06	16.791	1.139
4.755	9.782	17.134	1.152
4.762	10.799	16.73	1.095
4.769	9.976	18.046	1.171
4.776	9.538	16.127	1.06
4.783	9.908	16.791	1.091
4.79	9.906	16.722	1.121
4.798	10.072	16.959	1.079
4.805	9.663	17.57	1.056
4.812	9.787	16.793	1.147
4.819	9.812	17.206	1.121
4.826	10.55	18.505	1.113
4.833	9.867	16.801	1.114
4.84	9.897	16.985	1.133
4.848	9.554	16.767	1.048
4.855	10.189	17.037	1.123
4.862	9.56	17.803	1.03
4.869	10.176	17.347	1.106
4.876	10.098	17.785	1.039
4.883	10.445	16.853	1.065
4.89	10.043	17.864	1.085
4.898	9.901	16.273	1.064
4.905	10.042	16.711	1.099
4.912	9.845	16.256	1.038
4.919	9.998	16.464	1.01
4.926	9.996	16.81	1.068
4.933	9.969	16.682	1.039
4.941	10.102	18.419	1.081
4.948	9.874	16.534	1.108
4.955	10.259	16.981	1.067
4.962	10.131	16.707	1.112
4.969	10.046	17.219	1.077
4.976	9.39	15.711	1.026
4.983	10.308	17.153	1.045
4.991	10.556	17.983	1.078
4.998	10.3	16.414	1.089
5.005	11.228	16.674	1.103
5.012	10.154	16.309	1.09
5.019	10.414	16.414	1.085
5.026	10.137	20.771	1.082
5.033	10.433	16.762	1.071
5.041	9.2	14.768	0.933
5.048	10.603	17.345	1.078
5.055	10.448	16.965	1.115
5.062	10.237	16.399	1.074
5.069	10.269	16.697	1.117
5.076	10.235	16.606	1.095
5.084	10.089	16.268	1.133
5.091	10.603	17.419	1.093
5.098	10.121	17.371	1.112
5.105	10.294	16.336	1.13
5.112	10.132	15.917	1.085
5.119	10.397	19.235	1.086
5.126	10.29	17.162	1.126
5.134	9.778	17.028	1.127
5.141	10.337	16.025	1.131
5.148	10.069	15.652	1.103
5.155	9.927	16.409	1.132
5.162	9.499	15.69	1.123
5.169	9.548	16.039	1.086
5.176	9.627	16.413	1.155
5.184	9.777	16.066	1.118
5.191	9.752	15.98	1.11
5.198	9.699	16.377	1.148
5.205	10.349	16.332	1.122
5.212	9.638	16.598	1.124
5.219	9.851	16.315	1.124
5.227	9.521	16.304	1.096
5.234	9.613	17.342	1.158
5.241	10.045	16.973	1.169
5.248	9.286	16.667	1.112
5.255	9.324	16.81	1.207
5.262	9.697	17.312	1.154
5.269	9.519	17.148	1.104
5.277	9.945	17.623	1.19
5.284	10.711	17.619	1.13
5.291	9.753	18.045	1.096
5.298	10.332	18.204	1.117
5.305	9.933	17.578	1.145
5.312	9.628	17.214	1.125
5.319	9.782	18.879	1.11
5.327	9.818	16.981	1.084
5.334	9.7	17.117	1.146
5.341	9.579	16.583	1.073
5.348	10.328	17.519	1.145
5.355	9.425	16.028	1.043
5.362	9.82	17.297	1.084
5.37	9.953	17.392	1.092
5.377	10.26	16.782	1.126
5.384	9.834	16.883	1.062
5.391	9.884	17.094	1.098
5.398	10.11	16.332	1.111
5.405	10.187	17.208	1.152
5.412	10.293	17.429	1.093
5.42	10.377	16.425	1.124
5.427	9.957	16.018	1.074
5.434	9.794	15.961	1.112
5.441	10.087	16.438	1.14
5.448	10.326	17.103	1.095
5.455	10.267	16.279	1.199
5.462	10.073	16.069	1.111
5.47	10.885	18.098	1.119
5.477	10.385	16.702	1.102
5.484	10.238	16.526	1.1
5.491	10.002	15.933	1.07
5.498	10.103	15.464	1.06
5.505	11.082	15.928	1.082
5.513	10.369	16.142	1.114
5.52	10.164	15.856	1.103
5.527	10.302	16.69	1.107
5.534	10.403	16.076	1.15
5.541	10.438	16.279	1.11
5.548	10.463	16.091	1.113
5.555	10.121	15.514	1.064
5.563	9.877	15.048	1.04
5.57	10.126	16.042	1.151
5.577	10.223	16.48	1.187
5.584	10.482	16.355	1.088
5.591	10.414	17.742	1.119
5.598	10.603	16.83	1.092
5.605	10.283	15.879	1.093
5.613	10.474	16.971	1.142
5.62	10.531	16.484	1.075
5.627	10.46	15.935	1.11
5.634	10.928	16.746	1.112
5.641	10.517	16.158	1.141
5.648	10.106	16.171	1.125
5.656	10.722	16.345	1.131
5.663	10.374	17.814	1.104
5.67	9.596	15.345	1.052
5.677	10.502	16.44	1.096
5.684	10.295	16.427	1.137
5.691	10.021	16.264	1.111
5.698	10.355	15.647	1.122
5.706	10.164	15.968	1.076
5.713	10.593	16.694	1.113
5.72	10.056	17.667	1.149
5.727	10.246	17.346	1.123
5.734	9.86	16.694	1.087
5.741	9.332	15.714	1.055
5.748	10.087	17.282	1.157
5.756	10.022	17.615	1.185
5.763	10.149	17.979	1.124
5.77	10.257	17.125	1.146
5.777	9.655	17.164	1.096
5.784	9.733	17.118	1.128
5.791	10.004	17.612	1.13
5.799	9.777	17.327	1.133
5.806	9.611	17.338	1.109
5.813	10.03	17.266	1.12
5.82	9.631	16.936	1.094
5.827	10.079	18.185	1.154
5.834	10	17.476	1.169
5.841	9.882	17.506	1.134
5.849	9.735	17.292	1.143
5.856	10.149	18.266	1.148
5.863	9.99	17.663	1.123
5.87	9.699	17.209	1.096
5.877	9.962	18.074	1.164
5.884	9.821	17.646	1.155
5.891	10.018	19.006	1.199
5.899	9.977	18.687	1.191
5.906	10.043	18.263	1.149
5.913	9.834	17.797	1.142
5.92	10.062	18.118	1.176
5.927	10.06	18.305	1.181
5.934	10.199	19.272	1.157
5.942	10.048	18.786	1.156
5.949	10.227	18.817	1.185
5.956	10.141	18.608	1.17
5.963	10.078	18.62	1.185
5.97	10.22	19.219	1.192
5.977	10.077	18.931	1.185
5.984	10.571	19.037	1.19
5.992	10.363	19.14	1.214
5.999	10.257	18.941	1.176
6.006	10.477	18.629	1.22
6.013	10.524	19.313	1.196
6.02	10.157	19.023	1.212
6.027	10.635	19.257	1.242
6.034	10.105	18.808	1.194
6.042	10.026	18.917	1.197
6.049	10.43	19.565	1.22
6.056	10.178	19.846	1.211
6.063	10.209	19.261	1.202
6.07	9.712	18.199	1.168
6.077	10.459	20.016	1.196
6.084	10.066	19.222	1.2
6.092	10.033	18.975	1.168
6.099	10.092	19.161	1.197
6.106	10.078	19.206	1.19
6.113	9.815	19.171	1.182
6.12	9.913	19.534	1.187
6.127	10.134	19.626	1.156
6.135	9.916	19.563	1.17
6.142	10.099	19.133	1.182
6.149	10.013	20.022	1.194
6.156	9.859	20.829	1.169
6.163	9.653	19.437	1.156
6.17	9.825	20.349	1.189
6.177	9.979	19.824	1.192
6.185	9.714	20.404	1.147
6.192	9.994	20.696	1.17
6.199	9.726	19.635	1.138
6.206	9.84	20.149	1.201
6.213	9.84	20.461	1.18
6.22	9.792	20.042	1.196
6.227	9.654	20.502	1.165
6.235	9.534	19.876	1.127
6.242	9.715	20.352	1.144
6.249	9.831	20.479	1.172
6.256	9.542	20.433	1.154
6.263	9.728	20.86	1.153
6.27	9.429	20.312	1.141
6.278	9.639	20.221	1.153
6.285	9.711	20.182	1.168
6.292	9.605	20.777	1.153
6.299	9.541	20.529	1.147
6.306	9.59	20.55	1.189
6.313	9.52	20.184	1.146
6.32	9.584	20.492	1.166
6.328	9.79	21.2	1.183
6.335	9.882	20.851	1.152
6.342	9.503	20.473	1.158
6.349	9.52	20.146	1.149
6.356	9.515	20.185	1.169
6.363	9.591	20.821	1.173
6.37	9.806	21.281	1.209
6.378	9.737	20.578	1.154
6.385	9.81	20.614	1.164
6.392	10.288	21.183	1.173
6.399	9.704	20.68	1.178
6.406	9.608	20.857	1.187
6.413	10.072	20.54	1.191
6.421	9.827	21.187	1.177
6.428	9.995	20.671	1.19
6.435	9.914	21.109	1.218
6.442	10.2	21.243	1.202
6.449	10.359	21.172	1.213
6.456	9.983	21.198	1.171
6.463	10.313	21.587	1.233
6.471	10.513	21.503	1.201
6.478	10.438	21.657	1.227
6.485	10.535	21.439	1.213
6.492	10.043	21.126	1.182
6.499	10.471	21.49	1.202
6.506	10.467	21.955	1.22
6.513	10.547	21.927	1.263
6.521	10.339	22.217	1.212
6.528	10.534	22.264	1.201
6.535	10.334	21.802	1.187
6.542	11.701	22.069	1.24
6.549	10.492	21.975	1.273
6.556	10.576	21.865	1.201
6.564	11.235	23.242	1.215
6.571	10.157	21.011	1.226
6.578	9.087	19.534	1.057
6.585	10.864	22.565	1.223
6.592	11.296	23.592	1.242
6.599	10.576	23.55	1.199
6.606	10.321	21.881	1.193
6.614	10.37	22.374	1.193
6.621	11.008	22.859	1.184
6.628	10.161	21.858	1.145
6.635	10.055	21.273	1.141
6.642	10.622	22.198	1.193
6.649	10.607	23.467	1.189
6.656	10.674	22.101	1.208
6.664	10.742	22.799	1.196
6.671	10.615	22.976	1.2
6.678	10.265	22.234	1.231
6.685	10.092	20.881	1.14
6.692	10.667	22.963	1.181
6.699	10.066	22.179	1.183
6.707	10.314	23.245	1.147
6.714	10.671	23.902	1.212
6.721	10.613	21.233	1.195
6.728	10.186	21.465	1.139
6.735	10.488	21.832	1.185
6.742	10.735	22.575	1.2
6.749	10.354	20.708	1.193
6.757	10.411	22.132	1.197
6.764	10.569	21.72	1.196
6.771	10.463	22.059	1.19
6.778	10.95	22.312	1.226
6.785	10.592	21.5	1.17
6.792	10.209	20.841	1.099
6.799	10.805	22.131	1.186
6.807	10.695	23.874	1.18
6.814	10.371	21.014	1.155
6.821	11.103	21.905	1.182
6.828	10.629	21.24	1.177
6.835	10.974	22.088	1.142
6.842	10.801	22.154	1.159
6.85	11.377	22.757	1.221
6.857	11.035	22.323	1.155
6.864	11.02	21.648	1.188
6.871	11.221	22.271	1.242
6.878	11.014	22	1.197
6.885	12.069	21.677	1.236
6.892	10.732	20.722	1.105
6.9	10.95	20.192	1.118
6.907	11.898	24.283	1.175
6.914	11.627	22.072	1.181
6.921	11.615	21.307	1.256
6.928	12.137	20.786	1.168
6.935	12.64	21.183	1.173
6.942	11.063	20.722	1.206
6.95	11.439	21.72	1.185
6.957	11.113	19.936	1.129
6.964	11.497	20.555	1.171
6.971	11.816	21.509	1.162
6.978	11.612	20.853	1.196
6.985	11.551	20.115	1.233
6.993	11.993	20.874	1.182
7	11.406	20.218	1.166
7.007	11.439	21.942	1.182
7.014	11.7	20.544	1.211
7.021	11.056	19.316	1.21
7.028	11.395	20.32	1.102
7.035	10.928	19.425	1.18
7.043	11.109	19.56	1.159
7.05	11.946	19.945	1.142
7.057	11.953	19.588	1.119
7.064	10.98	18.353	1.11
7.071	10.666	18.699	1.249
7.078	11.529	19.792	1.219
7.085	11.431	20.553	1.155
7.093	12.026	22.292	1.264
7.1	10.781	20.949	1.117
7.107	10.949	18.607	1.119
7.114	10.895	19.177	1.127
7.121	11.277	18.828	1.22
7.128	11.954	18.243	1.116
7.136	11.316	19.44	1.214
7.143	11.082	20.96	1.158
7.15	11.42	19.879	1.191
7.157	11.859	19.422	1.161
7.164	11.504	19.09	1.222
7.171	11.479	20.48	1.177
7.178	12.894	21.568	1.191
7.186	11.931	19.564	1.127
7.193	11.179	17.999	1.156
7.2	11.268	18.238	1.188
7.207	12.19	20.657	1.218
7.214	11.53	17.272	1.093
7.221	11.602	19.729	1.164
7.228	11.665	18.415	1.212
7.236	11.539	19.515	1.217
7.243	10.893	18.409	1.17
7.25	11.572	17.916	1.12
7.257	11.824	18.465	1.22
7.264	11.686	19.284	1.214
7.271	9.874	16.098	1.026
7.279	11.396	18.355	1.164
7.286	11.219	17.723	1.175
7.293	11.763	18.259	1.213
7.3	11.861	19.034	1.208
7.307	11.469	18.669	1.253
7.314	11.731	17.855	1.157
7.321	12.293	19.07	1.244
7.329	11.6	18.18	1.215
7.336	11.699	18.384	1.191
7.343	12.441	19.56	1.259
7.35	11.94	19.097	1.261
7.357	11.821	19.195	1.307
7.364	11.794	18.599	1.279
7.371	12.568	20.697	1.322
7.379	11.693	19.051	1.246
7.386	12.03	19.468	1.227
7.393	12.148	18.889	1.193
7.4	11.981	18.831	1.249
7.407	11.493	19.716	1.182
7.414	12.007	19.671	1.22
7.422	11.985	19.352	1.244
7.429	12.356	19.156	1.243
7.436	13.008	19.513	1.247
7.443	11.689	19.202	1.2
7.45	12.098	19.431	1.268
7.457	12.425	20.346	1.254
7.464	11.488	21.413	1.266
7.472	13.261	19.69	1.239
7.479	11.764	19.074	1.248
7.486	12.142	20.831	1.231
7.493	11.545	18.744	1.188
7.5	12.174	20.228	1.224
7.507	12.596	20.403	1.265
7.514	12.059	20.367	1.235
7.522	12.656	21.311	1.281
7.529	11.865	18.906	1.115
7.536	11.756	19.841	1.185
7.543	12.172	20.768	1.225
7.55	12.007	19.159	1.135
7.557	12.371	19.908	1.186
7.565	12.382	19.703	1.171
7.572	12.135	19.893	1.185
7.579	12.065	19.797	1.207
7.586	11.552	19.587	1.17
7.593	11.847	19.754	1.177
7.6	11.97	19.778	1.17
7.607	10.978	18.669	1.143
7.615	11.617	19.689	1.157
7.622	11.63	19.551	1.198
7.629	12.596	19.855	1.215
7.636	11.63	20.006	1.278
7.643	11.506	19.632	1.181
7.65	11.528	19.849	1.267
7.657	11.546	20.315	1.215
7.665	11.918	20.128	1.275
7.672	11.922	19.933	1.218
7.679	11.704	19.863	1.22
7.686	10.611	18.585	1.16
7.693	11.858	19.797	1.257
7.7	11.388	20.427	1.243
7.708	11.785	20.486	1.189
7.715	11.563	19.645	1.248
7.722	11.373	19.103	1.197
7.729	11.068	20.656	1.205
7.736	10.772	18.338	1.172
7.743	11.516	19.264	1.256
7.75	11.323	19.617	1.246
7.758	10.984	20.912	1.231
7.765	10.924	18.064	1.158
7.772	11.982	23.331	1.262
7.779	11.138	19.3	1.189
7.786	11.492	20.038	1.273
7.793	11.497	19.99	1.237
7.8	11.31	20.02	1.196
7.808	12.204	19.679	1.252
7.815	11.565	20.227	1.231
7.822	12.096	20.211	1.205
7.829	11.34	18.783	1.155
7.836	11.784	21.193	1.206
7.843	11.542	19.29	1.237
7.851	12.777	19.596	1.231
7.858	11.885	18.793	1.131
7.865	12.149	19.478	1.168
7.872	12.207	18.906	1.187
7.879	11.888	18.863	1.171
7.886	12.091	19.367	1.21
7.893	12.342	18.603	1.119
7.901	11.435	17.376	1.126
7.908	12.755	19.222	1.177
7.915	12.33	18.912	1.233
7.922	13.435	19.011	1.24
7.929	13.484	19.369	1.225
7.936	12.189	19.258	1.147
7.943	11.871	18.511	1.085
7.951	12.815	19.267	1.249
7.958	12.809	18.86	1.191
7.965	13.202	18.932	1.19
7.972	12.732	18.681	1.206
7.979	12.868	19.127	1.154
7.986	13.459	18.637	1.156
7.994	13.289	19.37	1.14
8.001	13.723	19.313	1.31
8.008	13.385	17.608	1.176
8.015	13.626	18.645	1.201
8.022	12.712	17.834	1.136
8.029	13.083	17.783	1.221
8.036	13.167	17.479	1.162
8.044	13.424	18.83	1.246
8.051	13.497	18.824	1.201
8.058	13.989	19.901	1.21
8.065	13.643	18.171	1.168
8.072	13.348	18.684	1.209
8.079	13.921	19.445	1.196
8.086	14.12	19.001	1.18
8.094	12.58	17.434	1.192
8.101	13.431	18.622	1.165
8.108	14.018	18.794	1.179
8.115	15.563	19.535	1.268
8.122	13.615	18.537	1.178
8.129	14.09	18.993	1.29
8.137	13.528	19.563	1.193
8.144	12.984	17.653	1.182
8.151	13.564	18.631	1.281
8.158	13.656	19.686	1.199
8.165	13.975	18.89	1.219
8.172	14.61	18.238	1.198
8.179	14.798	18.323	1.2
8.187	13.47	18.339	1.173
8.194	13.37	17.91	1.171
8.201	13.479	18.399	1.177
8.208	14.303	18.658	1.279
8.215	13.877	17.949	1.168
8.222	13.559	17.735	1.139
8.229	13.03	17.42	1.085
8.237	13.031	17.11	1.194
8.244	13.246	17.46	1.121
8.251	13.547	18.087	1.151
8.258	13.384	17.463	1.113
8.265	13.161	17.675	1.123
8.272	13.782	17.462	1.125
8.279	13.319	17.183	1.126
8.287	14.128	16.721	1.135
8.294	13.252	16.647	1.148
8.301	12.562	16.584	1.109
8.308	12.257	15.858	1.124
8.315	13.266	16.539	1.18
8.322	11.996	15.76	1.065
8.33	12.189	15.102	1.076
8.337	12.563	16.338	1.127
8.344	12.197	15.179	1.079
8.351	12.091	15.506	1.148
8.358	11.48	14.32	1.096
8.365	12.205	15.51	1.118
8.372	11.566	14.982	1.172
8.38	12.263	15.656	1.109
8.387	12.654	15.501	1.176
8.394	11.876	14.776	1.082
8.401	12.028	15.303	1.146
8.408	12.74	14.765	1.155
8.415	12.846	15.714	1.159
8.422	12.62	15.695	1.201
8.43	12.632	15.953	1.201
8.437	12.482	16.169	1.224
8.444	12.684	15.618	1.176
8.451	12.671	15.782	1.211
8.458	12.354	16.861	1.183
8.465	12.315	15.769	1.183
8.473	12.263	15.817	1.219
8.48	13.104	16.634	1.195
8.487	12.893	17.686	1.311
8.494	12.755	16.089	1.212
8.501	12.87	16.628	1.259
8.508	12.123	16.232	1.243
8.515	12.471	17.091	1.246
8.523	11.613	15.959	1.167
8.53	12.076	16.009	1.19
8.537	12.055	17.56	1.273
8.544	12.33	18.444	1.248
8.551	11.834	17.615	1.283
8.558	11.8	18.119	1.264
8.565	11.845	17.533	1.27
8.573	11.81	17.843	1.248
8.58	12.547	18.546	1.244
8.587	12.285	20.542	1.258
8.594	11.654	18.4	1.299
8.601	12.289	18.359	1.365
8.608	12.364	18.532	1.281
8.616	12.477	18.26	1.241
8.623	11.69	17.879	1.235
8.63	12.456	18.647	1.308
8.637	12.29	18.211	1.228
8.644	11.822	18.485	1.217
8.651	12.744	18.471	1.279
8.658	11.935	19.091	1.208
8.666	12.897	18.81	1.245
8.673	11.97	18.629	1.214
8.68	12.652	18.524	1.237
8.687	11.525	18.389	1.242
8.694	12.717	18.837	1.236
8.701	12.866	18.744	1.275
8.708	12.152	18.984	1.234
8.716	12.662	18.861	1.254
8.723	13.406	19.336	1.27
8.73	12.737	19.338	1.263
8.737	12.255	17.712	1.199
8.744	12.309	18.272	1.195
8.751	12.853	18.35	1.248
8.759	13.008	18.867	1.272
8.766	12.6	18.057	1.174
8.773	12.932	18.409	1.263
8.78	13.739	18.005	1.244
8.787	14.325	18.197	1.253
8.794	13.426	18.233	1.244
8.801	14.248	18.137	1.259
8.809	14.309	19.457	1.231
8.816	14.077	17.986	1.307
8.823	13.946	17.33	1.196
8.83	15.235	17.895	1.21
8.837	17.293	18.085	1.283
8.844	16.856	18.094	1.239
8.851	15.353	17.76	1.269
8.859	15.582	18.043	1.222
8.866	16.674	18.421	1.21
8.873	15.659	16.813	1.225
8.88	15.386	17.333	1.238
8.887	17.968	18.048	1.24
8.894	15.69	17.801	1.319
8.902	16.332	18.063	1.279
8.909	15.306	17.022	1.236
8.916	16.053	17.386	1.329
8.923	15.412	17.282	1.212
8.93	16.486	17.298	1.192
8.937	16.314	18.257	1.286
8.944	16.031	18.093	1.225
8.952	16.186	18.835	1.258
8.959	16.054	17.32	1.22
8.966	14.95	17.224	1.244
8.973	15.648	17.805	1.208
8.98	14.462	17.112	1.146
8.987	15.169	17.567	1.227
8.994	15.081	17.923	1.225
9.002	14.518	16.959	1.214
9.009	14.344	16.682	1.185
9.016	15.448	17.578	1.259
9.023	13.886	16.742	1.221
9.03	14.73	17.244	1.193
9.037	14.409	17.494	1.249
9.045	13.68	18.87	1.178
9.052	13.409	17.792	1.167
9.059	13.665	17.093	1.18
9.066	13.799	18.843	1.197
9.073	13.652	17.631	1.167
9.08	13.733	16.871	1.192
9.087	12.992	16.399	1.173
9.095	13.705	16.801	1.125
9.102	14.768	16.597	1.188
9.109	14.382	17.326	1.204
9.116	15.014	15.985	1.328
9.123	14.472	16.571	1.171
9.13	14.724	16.227	1.175
9.137	14.94	16.227	1.187
9.145	15.745	18.055	1.285
9.152	14.838	16.4	1.181
9.159	14.683	16.424	1.183
9.166	15.147	16.662	1.197
9.173	14.754	16.448	1.146
9.18	14.85	16.108	1.163
9.188	14.811	16.568	1.152
9.195	15.004	17.289	1.134
9.202	14.143	14.995	1.17
9.209	15.268	16.111	1.19
9.216	14.707	16.085	1.222
9.223	14.752	15.568	1.108
9.23	13.225	14.86	1.028
9.238	14.424	18.56	1.178
9.245	14.454	15.792	1.145
9.252	14.238	16.32	1.143
9.259	14.052	16.094	1.158
9.266	14.928	16.203	1.167
9.273	13.844	16.632	1.132
9.28	13.486	16.376	1.097
9.288	13.824	16.595	1.213
9.295	14.428	16.352	1.19
9.302	14.597	16.357	1.128
9.309	13.754	16.468	1.188
9.316	13.666	16.744	1.081
9.323	13.997	15.992	1.131
9.331	14.127	15.881	1.13
9.338	13.731	15.977	1.139
9.345	13.066	16.905	1.133
9.352	13.234	16.1	1.109
9.359	13.805	15.824	1.108
9.366	12.929	15.667	1.159
9.373	12.838	14.996	1.091
9.381	12.554	14.579	1.066
9.388	13.374	14.973	1.15
9.395	13.429	14.694	1.084
9.402	14.103	14.884	1.115
9.409	14.366	15.135	1.15
9.416	14.567	16.043	1.148
9.423	13.895	15.074	1.117
9.431	14.243	15.2	1.099
9.438	15.666	15.528	1.253
9.445	15.079	15.633	1.203
9.452	14.519	14.526	1.153
9.459	15.278	15.345	1.23
9.466	14.298	15.029	1.115
9.474	15.212	15.838	1.155
9.481	14.905	14.43	1.175
9.488	15.07	15.029	1.2
9.495	15.673	15.665	1.188
9.502	15.539	15.135	1.157
9.509	15.184	14.533	1.142
9.516	16.865	16.086	1.27
9.524	16.978	14.726	1.157
9.531	15.055	14.948	1.164
9.538	15.694	15.102	1.198
9.545	15.33	15.162	1.158
9.552	15.057	14.705	1.129
9.559	15.643	15.322	1.224
9.566	15.883	15.781	1.178
9.574	14.804	14.274	1.264
9.581	15.428	15.728	1.237
9.588	15.831	17.357	1.142
9.595	15.332	15.098	1.187
9.602	15.205	15.548	1.139
9.609	14.838	17.48	1.127
9.617	15.776	16.012	1.144
9.624	15.434	15.944	1.227
9.631	16.358	16.526	1.183
9.638	15.12	15.923	1.159
9.645	15.599	17.927	1.225
9.652	14.859	15.634	1.298
9.659	16.097	16.213	1.139
9.667	16.427	16.776	1.27
9.674	15.608	15.844	1.092
9.681	15.483	15.758	1.132
9.688	14.816	15.435	1.061
9.695	17.264	16.071	1.121
9.702	16.342	17.406	1.139
9.709	16.293	16.79	1.11
9.717	16.104	15.446	1.085
9.724	16.335	17.734	1.125
9.731	17.092	16.588	1.144
9.738	16.807	16.502	1.101
9.745	17.022	15.955	1.091
9.752	16.012	16.208	1.068
9.76	17.12	17.99	1.233
9.767	16.516	17.099	1.126
9.774	15.682	15.39	0.986
9.781	17.008	16.669	1.172
9.788	16.225	16.817	1.125
9.795	15.743	17.296	1.141
9.802	14.223	14.775	1.038
9.81	15.07	17.738	1.084
9.817	15.039	16.389	1.19
9.824	15.309	16.583	1.175
9.831	14.643	17.115	1.181
9.838	14.512	16.62	1.089
9.845	14.897	17.23	1.123
9.852	13.896	16.387	1.128
9.86	14.307	17.189	1.123
9.867	13.095	16.499	1.032
9.874	13.733	15.947	1.043
9.881	14.009	16.995	1.17
9.888	14.052	17.801	1.169
9.895	14.01	17.008	1.078
9.903	13.823	15.954	1.078
9.91	14.173	16.848	1.129
9.917	14.14	16.922	1.146
9.924	13.972	16.668	1.125
9.931	14.481	17.736	1.143
9.938	13.028	15.944	1.064
9.945	13.078	16.645	1.097
9.953	13.681	16.215	1.084
9.96	13.674	16.129	1.101
9.967	13.39	15.744	1.043
9.974	12.702	15.772	1.03
9.981	13.202	16.477	1.035
9.988	14.783	16.965	1.076
9.995	13.245	16.787	1.044
10.003	12.843	17.442	1.018
10.01	13.634	18.472	1.077
10.017	13.744	16.114	1.067
10.024	13.716	16.488	1.1
10.031	13.381	16.763	1.062
10.038	13.715	16.468	1.214
10.046	12.826	15.441	1.024
10.053	14.273	16.816	1.127
10.06	13.868	16.403	1.082
10.067	14.147	16.529	1.1
10.074	14.33	18.682	1.107
10.081	14.111	17.099	1.101
10.088	14.507	17.616	1.11
10.096	14.399	15.774	1.068
10.103	13.7	16.407	1.096
10.11	13.966	16.555	1.089
10.117	13.979	16.398	1.106
10.124	15.418	15.615	1.097
10.131	13.622	15.213	1.028
10.138	16.7	16.551	1.083
10.146	14.435	15.771	1.075
10.153	13.843	15.521	1.038
10.16	13.631	15.602	1.121
10.167	14.237	16.111	1.094
10.174	14.384	16.464	1.064
10.181	14.516	17.26	1.054
10.189	15.596	15.669	1.057
10.196	14.333	15.883	1.113
10.203	14.736	16.203	1.076
10.21	14.482	16.305	1.044
10.217	14.784	15.93	1.046
10.224	14.538	16.793	1.044
10.231	14.94	15.786	1.13
10.239	14.536	15.451	1.001
10.246	13.977	14.83	0.992
10.253	14.611	15.49	1.079
10.26	14.211	15.557	1.016
10.267	14.912	15.3	1.004
10.274	15.105	15.562	1.066
10.281	14.723	14.362	0.998
10.289	15.544	15.673	1.062
10.296	15.46	14.74	1.031
10.303	15.407	18.147	1.045
10.31	14.907	14.775	1.03
10.317	14.87	14.409	0.996
10.324	14.752	14.087	0.969
10.331	14.299	14.609	1.024
10.339	15.219	14.933	1.013
10.346	15.569	13.75	0.948
10.353	14.801	13.57	1.025
10.36	15.605	14.289	0.993
10.367	15.283	13.904	0.989
10.374	15.717	14.292	1.048
10.382	16.293	14.696	1.059
10.389	16.731	14.684	1.021
10.396	15.688	14.129	1.013
10.403	15.95	14.456	1.007
10.41	15.915	14.376	1.021
10.417	15.625	15.183	0.946
10.424	15.982	14.094	1.032
10.432	16.339	14.195	1.032
10.439	16.182	13.906	1.031
10.446	15.906	14.039	1.063
10.453	16.33	15.387	1.005
10.46	15.866	14.147	0.99
10.467	16.131	13.823	1.015
10.474	15.399	14.565	1.012
10.482	16.058	14.054	1.031
10.489	16.217	14.467	1.028
10.496	15.698	14.679	1.008
10.503	16.313	14.461	1.024
10.51	16.656	14.327	1.026
10.517	16.336	14.917	1.041
10.525	15.486	14.492	1.079
10.532	15.933	15.965	1.013
10.539	15.451	14.26	1.029
10.546	15.07	14.125	1.018
10.553	14.805	14.301	1.042
10.56	15.101	13.993	1.006
10.567	14.37	14.319	1.059
10.575	14.153	14.462	1.014
10.582	13.905	14.202	1.014
10.589	13.423	14.088	1.006
10.596	13.431	14.435	1.019
10.603	13.57	14.419	1.02
10.61	13.134	14.575	1.025
10.617	13.086	14.58	1.008
10.625	12.866	14.48	0.994
10.632	12.609	14.64	1.031
10.639	12.467	14.386	0.99
10.646	12.651	14.987	1.064
10.653	12.334	14.856	1.045
10.66	11.962	14.993	1.028
10.668	12.391	15.31	1.066
10.675	12.166	15.157	1.042
10.682	12.168	15.098	1.015
10.689	11.573	14.869	1.082
10.696	11.638	14.886	1.048
10.703	11.656	15.757	1.044
10.71	11.361	14.609	0.999
10.718	11.525	15.067	1.047
10.725	11.196	14.924	1.039
10.732	11.482	15.661	1.048
10.739	11.187	15.377	1.031
10.746	10.99	15.523	1.036
10.753	10.964	15.848	1.067
10.76	10.927	15.848	1.05
10.768	10.403	15.442	1.047
10.775	10.898	15.55	1.043
10.782	10.927	15.873	1.052
10.789	10.567	15.504	1.023
10.796	10.581	15.891	1.062
10.803	10.522	16.042	1.096
10.811	10.214	15.822	1.045
10.818	10.558	16.525	1.095
10.825	9.63	15.137	0.986
10.832	10.372	16.397	1.08
10.839	10.374	16.974	1.103
10.846	10.188	16.357	1.028
10.853	10.237	17.921	1.073
10.861	10.041	16.637	1.082
10.868	10.086	17.265	1.062
10.875	10.074	17.354	1.115
10.882	10.309	17.521	1.111
10.889	10.174	17.118	1.067
10.896	10.243	18.585	1.078
10.903	10.646	18.365	1.119
10.911	10.236	17.77	1.165
10.918	9.523	17.282	1.092
10.925	9.976	17.691	1.164
10.932	10.016	18.527	1.113
10.939	10.184	17.998	1.085
10.946	10.673	17.841	1.092
10.954	9.988	17.038	1.071
10.961	10.164	17.747	1.087
10.968	10.272	17.428	1.059
10.975	10.601	18.248	1.168
10.982	9.967	17.537	1.116
10.989	10.45	18.132	1.12
10.996	10.501	18.928	1.117
11.004	10.058	17.68	1.048
11.011	9.952	17.656	1.071
11.018	10.524	18.417	1.098
11.025	10.343	18.452	1.097
11.032	10.602	18.908	1.099
11.039	10.725	19.012	1.112
11.046	10.317	18.197	1.08
11.054	10.382	18.311	1.095
11.061	10.473	17.766	1.065
11.068	10.717	19.455	1.15
11.075	10.658	19.164	1.074
11.082	10.416	19.055	1.079
11.089	11.121	19.864	1.155
11.097	10.051	18.923	1.032
11.104	10.479	18.466	1.088
11.111	10.882	18.7	1.095
11.118	11.067	18.919	1.118
11.125	10.078	18.005	1.032
11.132	10.571	20.399	1.08
11.139	10.897	18.62	1.111
11.147	10.96	18.358	1.063
11.154	10.72	19.561	1.073
11.161	11.586	18.94	1.109
11.168	10.656	18.269	1.092
11.175	10.624	18.467	1.073
11.182	10.611	18.742	1.104
11.189	9.962	17.082	1.07
11.197	10.195	17.343	1.037
11.204	10.295	17.519	1.046
11.211	11.011	19.771	1.088
11.218	10.93	18.214	1.074
11.225	10.364	18.045	1.054
11.232	10.191	17.618	1.009
11.24	10.581	18.01	1.054
11.247	11.065	17.965	1.074
11.254	10.831	18.674	1.073
11.261	10.702	18.133	1.074
11.268	11.047	18.082	1.066
11.275	10.404	17.275	1.013
11.282	10.755	18.613	1.053
11.29	10.691	18.483	1.051
11.297	10.888	17.996	1.086
11.304	12.185	18.381	1.076
11.311	11.177	18.72	1.094
11.318	10.96	18.411	1.073
11.325	11.673	18.141	1.105
11.332	10.774	18.537	1.083
11.34	10.942	18.445	1.05
11.347	11.022	19.326	1.123
11.354	11.158	17.845	1.068
11.361	10.605	17.677	1.107
11.368	10.789	17.837	1.066
11.375	10.662	18.357	1.042
11.383	10.766	18.142	1.056
11.39	10.517	17.192	1.085
11.397	10.693	19.11	1.079
11.404	10.09	17.265	1.115
11.411	10.877	20.302	1.074
11.418	10.246	17.691	1.021
11.425	10.828	18.119	1.059
11.433	10.976	18.492	1.074
11.44	10.467	17.922	1.028
11.447	10.738	18.194	1.054
11.454	10.668	17.42	1.018
11.461	10.395	18.385	1.017
11.468	10.591	17.971	1.033
11.475	10.817	18.346	1.071
11.483	10.178	17.447	1.044
11.49	10.475	17.971	1.062
11.497	10.407	17.352	1.048
11.504	10.593	19.424	1.021
11.511	10.181	17.405	1.035
11.518	11.249	17.343	1.059
11.526	10.553	17.498	1.058
11.533	10.635	17.873	1.028
11.54	10.959	18.097	1.057
11.547	11.109	17.748	1.076
11.554	10.167	16.756	1.013
11.561	10.883	18.035	1.004
11.568	10.745	17.091	1.057
11.576	10.514	17.505	1.025
11.583	10.222	16.599	0.999
11.59	10.614	17.049	1.027
11.597	10.631	17.318	1.028
11.604	10.602	17.068	1.026
11.611	10.199	16.588	1
11.618	10.299	17.184	1.087
11.626	10.584	16.904	1.055
11.633	9.789	15.941	0.98
11.64	10.35	19.03	1.053
11.647	10.527	16.213	0.99
11.654	10.285	17.06	1.012
11.661	9.98	16.27	1.029
11.669	9.768	15.71	0.994
11.676	10.494	18.461	1.071
11.683	9.828	17.845	1.026
11.69	10.395	16.701	1.067
11.697	10.477	16.77	1.046
11.704	10.016	16.199	1.035
11.711	10.224	16.901	1.101
11.719	10.044	16.842	1.057
11.726	9.999	16.78	1.047
11.733	9.858	16.847	1.074
11.74	11.077	16.651	1.088
11.747	10.033	17.383	1.042
11.754	9.898	16.588	1.186
11.761	9.886	15.947	1.04
11.769	9.259	15.892	1.057
11.776	9.871	18.054	1.05
11.783	8.66	14.875	0.935
11.79	9.837	17.396	1.081
11.797	9.486	17.244	1.078
11.804	9.405	17.119	1.011
11.812	10.207	16.545	1.08
11.819	9.221	17.041	1.051
11.826	9.282	16.704	1.062
11.833	9.881	16.788	1.049
11.84	9.905	16.913	1.069
11.847	9.529	16.712	1.043
11.854	9.524	16.481	1.093
11.862	9.03	15.876	1.009
11.869	10.412	17.252	1.116
11.876	10.079	17.932	1.124
11.883	10.061	17.781	1.099
11.89	9.405	17.307	1.023
11.897	10.241	17.801	1.086
11.904	9.817	18.4	1.053
11.912	9.791	17.724	1.061
11.919	9.82	19.122	1.062
11.926	9.816	16.737	1.024
11.933	9.984	18.376	1.054
11.94	9.708	17.309	1.026
11.947	9.429	17.664	1.015
11.954	9.865	18.727	1.007
11.962	9.673	18.456	1.084
11.969	9.825	18.251	1.073
11.976	10.058	18.716	1.079
11.983	9.429	16.938	0.996
11.99	9.883	17.65	1.011
11.997	10.001	18.025	1.044
12.005	10.162	18.589	1.082
12.012	9.953	17.849	1.045
12.019	9.67	19.189	1.045
12.026	9.247	18.024	1.07
12.033	9.709	19.594	1.041
12.04	9.732	18.274	1.166
12.047	10.019	17.776	1.051
12.055	9.377	17.898	1.058
12.062	9.391	18.913	1.055
12.069	9.203	18.026	1.074
12.076	9.285	17.781	1.138
12.083	9.249	17.828	1.112
12.09	9.026	17.722	1.059
12.098	9.421	18.172	1.264
12.105	9.31	17.782	1.044
12.112	9.422	17.657	1.055
12.119	7.897	16.183	0.914
12.126	9.135	18.497	1.023
12.133	9.398	19.011	1.043
12.14	8.644	18.749	1.046
12.148	8.956	17.447	1.039
12.155	8.955	18.628	1.037
12.162	9.114	18.432	1.037
12.169	9.247	18.155	1.092
12.176	9.489	18.434	1.121
12.183	9.094	19.463	1.142
12.19	9.413	18.116	1.108
12.198	9.035	19.545	1.073
12.205	9.153	17.946	1.046
12.212	9.741	18.807	1.08
12.219	9.037	18.358	1.062
12.226	8.892	17.932	1.071
12.233	8.527	17.439	0.994
12.241	9.35	18.885	1.059
12.248	8.617	17.637	1.002
12.255	8.88	18.237	1.084
12.262	8.888	18.541	1.05
12.269	9.217	18.5	1.056
12.276	8.813	17.78	1.05
12.283	9.079	19.161	1.055
12.291	9.294	18.571	1.051
12.298	8.715	16.909	1.005
12.305	8.824	18.397	1.121
12.312	8.934	17.685	1.108
12.319	9.12	17.491	1.083
12.326	9.375	18.027	1.096
12.333	9.284	19.297	1.119
12.341	9.472	18.538	1.079
12.348	9.194	17.814	1.07
12.355	8.975	17.374	1.098
12.362	8.857	17.169	1.079
12.369	9.263	17.171	1.11
12.376	9.458	17.803	1.188
12.383	9.126	18.003	1.148
12.391	8.877	17.26	1.013
12.398	9.764	18.768	1.136
12.405	9.232	18.385	1.125
12.412	9.037	17.661	1.089
12.419	9.232	18.885	1.125
12.426	9.641	18.763	1.135
12.434	10.338	17.346	1.082
12.441	9.582	17.86	1.099
12.448	9.847	18.149	1.32
12.455	8.924	17.949	1.104
12.462	9.468	19.008	1.132
12.469	9.666	18.431	1.152
12.476	9.969	18.131	1.118
12.484	9.294	18.869	1.122
12.491	10.476	19.43	1.159
12.498	9.268	18.026	1.094
12.505	9.736	18.37	1.086
12.512	10.149	17.841	1.19
12.519	9.818	18.987	1.148
12.526	9.148	17.422	1.09
12.534	10.181	18.853	1.174
12.541	10.042	18.913	1.13
12.548	10.377	19.14	1.122
12.555	10.223	18.761	1.13
12.562	9.664	18.981	1.117
12.569	9.933	18.229	1.127
12.577	9.933	21.166	1.203
12.584	9.048	18.297	1.037
12.591	9.621	18.262	1.106
12.598	10.041	19.908	1.115
12.605	9.77	18.521	1.083
12.612	10.008	19.123	1.203
12.619	10.239	19.257	1.143
12.627	10.239	19.088	1.106
12.634	10.857	20.003	1.134
12.641	10.617	20.303	1.133
12.648	9.596	18.151	1.057
12.655	10.286	20.79	1.188
12.662	10.037	18.367	1.146
12.669	9.914	19.134	1.09
12.677	10.025	19.085	1.104
12.684	10.148	19.198	1.154
12.691	10.479	20.62	1.176
12.698	8.493	16.84	0.931
12.705	9.737	18.55	1.058
12.712	9.673	18.861	1.075
12.72	10.132	19.124	1.107
12.727	10.084	19.943	1.106
12.734	10.123	19.102	1.043
12.741	9.691	19.622	1.11
12.748	10.795	19.386	1.127
12.755	9.725	19.522	1.118
12.762	10.918	19.109	1.077
12.77	9.507	19.679	1.051
12.777	9.557	19.508	1.073
12.784	9.763	19.448	1.118
12.791	9.442	18.822	1.054
12.798	9.617	19.212	1.099
12.805	9.83	19.328	1.103
12.812	9.642	20.436	1.17
12.82	9.56	18.955	1.122
12.827	8.68	17.186	1.06
12.834	9.263	18.853	1.082
12.841	9.524	18.626	1.099
12.848	9.337	19.262	1.08
12.855	8.843	17.719	1.033
12.863	9.011	18.576	1.059
12.87	9.141	18.183	1.111
12.877	9.461	19.701	1.088
12.884	9.166	18.729	1.129
12.891	9.372	18.876	1.097
12.898	8.605	17.806	1.024
12.905	8.983	19.147	1.097
12.913	9.109	19.175	1.108
12.92	8.932	18.563	1.046
12.927	9.396	19.271	1.121
12.934	9.318	19.122	1.139
12.941	9.329	19.109	1.115
12.948	9.189	18.62	1.139
12.955	9.266	18.898	1.102
12.963	9.298	20.36	1.092
12.97	9.24	18.564	1.061
12.977	9.176	19.01	1.108
12.984	9.671	18.514	1.063
12.991	9.117	18.176	1.11
12.998	9.312	18.51	1.058
13.006	9.992	19.383	1.108
13.013	9.445	18.084	1.099
13.02	9.563	17.645	1.055
13.027	9.71	19.394	1.092
13.034	9.493	20.538	1.09
13.041	9.439	18.557	1.088
13.048	9.537	18.697	1.111
13.056	9.671	19.111	1.106
13.063	9.523	18.965	1.124
13.07	10.463	19.724	1.098
13.077	9.644	18.765	1.079
13.084	9.765	19.008	1.084
13.091	10.09	19.169	1.125
13.098	9.628	18.909	1.08
13.106	9.924	19.526	1.092
13.113	9.844	19.092	1.099
13.12	9.948	19.698	1.105
13.127	9.759	19.065	1.09
13.134	10.183	20.312	1.107
13.141	9.894	19.732	1.083
13.149	10.027	19.846	1.101
13.156	9.708	19.24	1.078
13.163	9.949	19.421	1.095
13.17	9.311	18.294	1.019
13.177	9.918	20.581	1.095
13.184	10.014	19.513	1.095
13.191	10.005	19.499	1.066
13.199	9.78	19.305	1.075
13.206	10.045	19.557	1.095
13.213	9.816	19.151	1.094
13.22	9.819	19.307	1.097
13.227	9.6	18.69	1.059
13.234	9.708	19.733	1.174
13.241	9.573	19.017	1.099
13.249	9.867	19.951	1.05
13.256	9.72	19.408	1.093
13.263	9.269	18.215	1.047
13.27	9.456	18.847	1.056
13.277	9.858	20.09	1.062
13.284	9.967	18.895	1.084
13.292	9.78	18.763	1.065
13.299	9.326	18.209	1.133
13.306	9.887	18.315	1.078
13.313	9.984	19.67	1.06
13.32	9.717	19.377	1.068
13.327	9.286	18.694	1.074
13.334	9.402	18.422	1.053
13.342	9.299	19.698	1.073
13.349	9.518	19.159	1.06
13.356	9.038	18.635	1.057
13.363	8.698	17.512	1.022
13.37	9.157	18.403	1.078
13.377	9.053	18.176	1.118
13.384	9.02	18.812	1.058
13.392	8.941	17.742	1.051
13.399	8.365	16.478	0.963
13.406	9.313	17.874	1.155
13.413	8.79	17.614	1.047
13.42	9.05	17.614	1.067
13.427	8.718	17.885	1.056
13.435	8.509	16.703	1.068
13.442	8.835	17.46	1.079
13.449	8.408	16.662	1.049
13.456	8.774	17.425	1.051
13.463	8.882	17.018	1.101
13.47	8.552	16.676	1.061
13.477	8.79	17.363	1.073
13.485	8.996	17.148	1.093
13.492	8.927	17.046	1.085
13.499	9.134	16.56	1.097
13.506	9.219	16.81	1.092
13.513	9.338	16.766	1.11
13.52	9.138	17.072	1.101
13.527	9.432	17.214	1.123
13.535	8.138	15.088	1.028
13.542	9.011	17.401	1.097
13.549	9.426	17.074	1.117
13.556	9.39	17.678	1.132
13.563	9.327	17.475	1.138
13.57	9.153	17.058	1.095
13.578	9.25	17.24	1.128
13.585	9.306	17.29	1.121
13.592	9.38	16.995	1.105
13.599	9.901	17.202	1.176
13.606	9.754	19.057	1.126
13.613	9.631	17.291	1.121
13.62	9.425	17.97	1.198
13.628	9.606	17.623	1.184
13.635	9.759	17.538	1.248
13.642	9.554	17.781	1.138
13.649	9.73	17.752	1.151
13.656	9.206	18.162	1.129
13.663	9.347	17.496	1.11
13.67	9.426	17.667	1.125
13.678	9.526	18.453	1.152
13.685	9.691	18.531	1.163
13.692	9.552	18.154	1.158
13.699	9.298	18.433	1.132
13.706	9.532	18.459	1.151
13.713	9.583	18.689	1.15
13.721	9.629	18.679	1.136
13.728	9.65	20.348	1.18
13.735	9.523	18.918	1.102
13.742	9.587	19.686	1.179
13.749	9.663	20.11	1.174
13.756	9.56	19.75	1.136
13.763	9.336	19.574	1.134
13.771	9.459	19.794	1.144
13.778	9.521	20.128	1.152
13.785	9.496	20.209	1.175
13.792	9.548	20.173	1.146
13.799	9.509	20.251	1.15
13.806	9.354	20.373	1.152
13.813	9.602	21.084	1.155
13.821	9.676	20.116	1.152
13.828	9.692	20.923	1.18
13.835	9.606	20.535	1.163
13.842	9.85	20.536	1.153
13.849	9.876	21.078	1.18
13.856	9.838	20.842	1.173
13.864	9.578	19.786	1.128
13.871	9.605	20.053	1.145
13.878	9.805	20.889	1.177
13.885	9.365	20.235	1.124
13.892	9.784	20.09	1.141
13.899	9.702	20.036	1.125
13.906	9.797	20.234	1.165
13.914	10.004	21.397	1.143
13.921	9.655	20.74	1.158
13.928	9.543	20.695	1.15
13.935	9.878	20.817	1.169
13.942	10.161	20.725	1.178
13.949	9.83	20.901	1.173
13.956	10.036	20.698	1.169
13.964	9.929	19.762	1.148
13.971	10.027	20.367	1.151
13.978	10.212	20.607	1.163
13.985	9.554	19.999	1.108
13.992	10.628	20.464	1.169
13.999	10.02	20.522	1.176
14.007	10.665	20.673	1.182
14.014	10.235	20.871	1.161
14.021	10.39	21.039	1.165
14.028	10.362	20.699	1.171
14.035	10.347	20.32	1.231
14.042	10.331	20.593	1.184
14.049	10.547	20.78	1.156
14.057	10.509	21.16	1.191
14.064	10.821	20.892	1.2
14.071	10.517	20.24	1.166
14.078	10.736	20.953	1.17
14.085	10.638	20.72	1.182
14.092	10.371	20.308	1.161
14.099	10.317	20.455	1.162
14.107	10.554	20.984	1.184
14.114	10.583	20.796	1.197
14.121	10.397	21.057	1.165
14.128	10.568	20.333	1.149
14.135	10.449	20.731	1.182
14.142	10.678	20.531	1.184
14.149	10.543	20.689	1.165
14.157	10.5	20.91	1.165
14.164	10.843	20.728	1.164
14.171	10.675	20.521	1.164
14.178	10.341	20.848	1.156
14.185	10.522	20.749	1.181
14.192	10.183	20.535	1.138
14.2	10.68	21.528	1.205
14.207	10.81	21.188	1.22
14.214	11.244	25.12	1.177
14.221	10.501	21.181	1.157
14.228	10.639	21.335	1.187
14.235	10.613	21.258	1.182
14.242	10.528	20.992	1.151
14.25	10.375	21.329	1.181
14.257	10.288	20.81	1.138
14.264	10.092	21.561	1.154
14.271	10.235	21.584	1.169
14.278	10.263	21.301	1.164
14.285	10.063	21.379	1.154
[truncated: 640 more rows]

## Sheet: 25R
Distance from commissure [mm]	Mg/Ca [mmol/mol]	Na/Ca [mmol/mol]	Sr/Ca [mmol/mol]
4.005e-08	16.419	21.356	1.149
0.715	16.157	17.128	1.151
1.43	16.689	16.59	1.119
2.145	16.256	17.519	1.184
2.86	16.585	18.616	1.108
3.575	17.015	16.876	1.152
4.29	17.561	16.94	1.121
5.005	16.852	17.027	1.131
5.719	17.106	16.895	1.136
6.434	16.996	16.882	1.165
7.149	16.23	16.908	1.084
7.864	16.802	16.754	1.128
8.579	17.331	17.205	1.136
9.294	16.661	16.837	1.196
10.009	17.109	17.175	1.1
10.724	16.638	16.586	1.132
11.439	17.562	18.59	1.208
12.154	17.104	17.186	1.073
12.869	16.159	17.6	1.028
13.584	16.608	16.429	1.044
14.299	19.016	17.91	1.219
15.014	18.241	18.053	1.187
15.729	17.956	17.813	1.125
16.444	18.925	19.196	1.163
17.159	19.231	18.582	1.154
17.874	19.463	18.325	1.124
18.589	19.937	18.335	1.137
19.304	18.888	17.823	1.119
20.019	18.991	17.727	1.152
20.734	19.52	18.474	1.12
21.449	19.171	18.208	1.158
22.164	18.628	19.74	1.105
22.879	19.501	18.951	1.187
23.594	19.44	18.521	1.172
24.309	19.076	18.332	1.17
25.024	19.099	18.425	1.146
25.739	19.252	19.349	1.184
26.454	18.382	18.565	1.266
27.169	19.748	19.335	1.306
27.884	23.567	22.483	1.231
28.599	18.011	17.778	1.082
29.314	19.748	19.388	1.168
30.029	18.938	18.739	1.162
30.744	19.775	18.719	1.155
31.459	19.146	19.164	1.095
32.174	18.513	18.878	1.153
32.889	18.738	19.123	1.161
33.604	18.621	18.016	1.123
34.319	17.576	18.97	1.094
35.034	17.755	17.575	1.115
35.749	17.801	17.802	1.129
36.464	16.834	16.843	1.089
37.179	17.602	17.638	1.109
37.894	19.911	18.166	1.154
38.609	17.849	18.175	1.142
39.324	17.248	17.723	1.119
40.039	17.61	17.824	1.143
40.754	17.671	18.113	1.171
41.469	17.357	18.101	1.157
42.184	17.863	18.534	1.182
42.899	18.076	18.952	1.216
43.614	18.024	18.442	1.174
44.329	18.05	18.293	1.165
45.044	18.875	18.974	1.195
45.759	18.478	18.794	1.209
46.474	18.784	20.22	1.165
47.188	18.702	18.523	1.202
47.903	18.142	18.52	1.163
48.618	19.452	18.426	1.223
49.333	18.773	18.548	1.201
50.048	18.667	18.215	1.178
50.763	19.083	18.811	1.199
51.478	19.1	19.102	1.207
52.193	20.573	19.042	1.202
52.908	19.463	18.617	1.218
53.623	20.058	20.325	1.216
54.338	19.561	18.686	1.206
55.053	19.92	18.624	1.223
55.768	19.946	19.096	1.182
56.483	19.824	18.793	1.234
57.198	20.841	18.85	1.205
57.913	20.072	18.708	1.185
58.628	19.887	19.754	1.179
59.343	20.095	19.416	1.197
60.058	20.491	20.598	1.238
60.773	21.025	19.679	1.199
61.488	20.536	19.525	1.215
62.203	20.24	20.758	1.214
62.918	20.56	20.308	1.2
63.633	20.078	19.239	1.181
64.348	20.253	20.67	1.25
65.063	20.559	19.881	1.236
65.778	19.784	19.236	1.171
66.493	20.133	20.446	1.227
67.208	19.331	19.537	1.177
67.923	19.69	19.943	1.221
68.638	19.584	19.881	1.252
69.353	19.684	20.017	1.246
70.068	20.802	19.906	1.217
70.783	19.147	19.226	1.16
71.498	19.083	18.541	1.076
72.213	20.988	20.35	1.236
72.928	20.662	20.063	1.235
73.643	20.591	19.828	1.218
74.358	20.031	19.878	1.268
75.073	20.075	19.781	1.217
75.788	20.012	20.918	1.312
76.503	18.676	19.162	1.172
77.218	19.384	19.798	1.238
77.933	19.127	19.666	1.215
78.648	19.712	19.964	1.22
79.363	19.675	19.371	1.199
80.078	19.575	19.577	1.186
80.793	20.144	21.023	1.204
81.508	19.699	19.887	1.208
82.223	19.426	19.839	1.229
82.938	19.364	19.086	1.217
83.653	19.873	18.608	1.217
84.368	20.053	19.353	1.239
85.083	20.268	19.548	1.233
85.798	19.412	19.386	1.272
86.513	19.524	20.249	1.225
87.228	18.54	19.086	1.211
87.943	19.578	19.556	1.21
88.657	18.763	19.048	1.229
89.372	19.395	19.715	1.2
90.087	19.586	20.059	1.254
90.802	19.385	20.04	1.233
91.517	19.287	21.86	1.223
92.232	18.912	20.926	1.214
92.947	18.374	20.387	1.174
93.662	18.65	20.174	1.225
94.377	18.754	20.793	1.205
95.092	18.06	19.824	1.184
95.807	18.105	20.048	1.189
96.522	18.249	21.407	1.204
97.237	18.488	20.583	1.182
97.952	17.487	19.201	1.239
98.667	18.143	20.625	1.173
99.382	19.096	20.798	1.182
100.097	17.764	20.048	1.169
100.812	17.988	21.163	1.161
101.527	17.779	20.617	1.146
102.242	17.484	20.16	1.192
102.957	17.088	19.847	1.111
103.672	16.158	18.846	1.088
104.387	16.228	19.407	1.11
105.102	17.095	20.202	1.147
105.817	17.269	20.151	1.179
106.532	16.878	19.654	1.132
107.247	17.258	19.11	1.094
107.962	16.329	19.513	1.146
108.677	15.924	19.588	1.133
109.392	15.992	19.44	1.161
110.107	15.856	20.061	1.157
110.822	14.326	17.969	1.058
111.537	15.078	18.581	1.1
112.252	14.884	18.62	1.116
112.967	15.078	20.267	1.154
113.682	14.556	18.668	1.11
114.397	14.856	18.84	1.124
115.112	14.584	18.909	1.117
115.827	14.841	19.454	1.136
116.542	14.644	19.26	1.122
117.257	15.213	19.257	1.122
117.972	14.317	18.788	1.116
118.687	14.283	19.001	1.121
119.402	14.837	18.944	1.11
120.117	14.619	18.848	1.113
120.832	14.161	18.625	1.105
121.547	14.583	18.5	1.071
122.262	14.492	18.748	1.125
122.977	17.219	19.253	1.234
123.692	15.079	19.329	1.103
124.407	15.496	19.227	1.196
125.122	15.487	19.383	1.136
125.837	15.357	17.797	1.081
126.552	15.39	18.445	1.15
127.267	15.662	18.07	1.126
127.982	17.752	18.17	1.232
128.697	17.343	18.886	1.146
129.411	16.627	18.64	1.148
130.126	17.286	18.903	1.158
130.841	20.621	18.504	1.2
131.556	17.535	18.588	1.157
132.271	18.666	18.742	1.244
132.986	17.402	18.227	1.18
133.701	19.264	19.07	1.189
134.416	17.807	19.215	1.205
135.131	20.596	19.004	1.187
135.846	18.187	18.936	1.225
136.561	17.144	17.906	1.161
137.276	17.884	18.714	1.193
137.991	18.13	19.079	1.236
138.706	16.571	17.933	1.142
139.421	17.633	19.3	1.197
140.136	16.981	18.681	1.219
140.851	17.021	18.8	1.189
141.566	17.049	19.937	1.248
142.281	16.523	18.896	1.165
142.996	18.667	20.406	1.292
143.711	17.404	21.28	1.263
144.426	17.024	19.917	1.246
145.141	16.316	18.596	1.171
145.856	18.747	21.261	1.345
146.571	18.954	21.828	1.282
147.286	19.832	20.908	1.339
148.001	19.513	20.41	1.269
148.716	23.714	21.008	1.386
149.431	20.272	21.433	1.353
150.146	20.667	21.142	1.299
150.861	20.545	20.955	1.334
151.576	20.008	20.749	1.278
152.291	23.347	22.448	1.314
153.006	22.202	21.492	1.367
153.721	21.692	21.769	1.307
154.436	22.358	22.038	1.356
155.151	23.597	21.771	1.326
155.866	21.624	20.659	1.281
156.581	23.543	21.631	1.295
157.296	22.211	22.456	1.311
158.011	22.678	22.736	1.394
158.726	22.53	22.002	1.309
159.441	21.059	21.542	1.295
160.156	23.057	22.841	1.378
160.871	22.574	22.66	1.34
161.586	20.548	20.503	1.156
162.301	20.854	22.038	1.296
163.016	21.273	24.566	1.313
163.731	20.172	21.886	1.226
164.446	21.175	21.879	1.249
165.161	19.366	23.141	1.224
165.876	20.097	22.435	1.289
166.591	20.93	22.38	1.302
167.306	19.279	22.017	1.264
168.021	19.932	22.386	1.287
168.736	19.14	22.334	1.394
169.451	19.046	22.239	1.269
170.166	18.225	21.673	1.223
170.88	18.48	21.669	1.185
171.595	17.56	21.705	1.254
172.31	20.133	21.961	1.242
173.025	18.516	22.115	1.218
173.74	17.281	21.465	1.207
174.455	16.875	21.742	1.215
175.17	16.381	21.277	1.206
175.885	15.99	20.047	1.125
176.6	16.69	22.629	1.211
177.315	15.407	20.36	1.122
178.03	15.954	22.194	1.21
178.745	15.962	21.519	1.151
179.46	15.862	21.267	1.155
180.175	15.301	23.042	1.156
180.89	15.512	21.156	1.164
181.605	14.933	20.364	1.133
182.32	14.742	20.614	1.152
183.035	14.522	20.944	1.216
183.75	14.434	20.835	1.164
184.465	15.305	20.871	1.202
185.18	14.809	20.179	1.15
185.895	13.678	19.338	1.123
186.61	14.017	20.802	1.16
187.325	14.113	20.48	1.161
188.04	14.662	20.267	1.153
188.755	13.693	20.015	1.134
189.47	14.398	20.117	1.167
190.185	13.922	19.71	1.174
190.9	14.043	19.258	1.106
191.615	13.576	19.241	1.136
192.33	13.551	19.538	1.123
193.045	14.386	19.896	1.069
193.76	14.308	19.677	1.131
194.475	14.288	19.578	1.15
195.19	14.971	19.46	1.138
195.905	14.723	19.818	1.149
196.62	14.599	19.328	1.148
197.335	14.513	19.427	1.148
198.05	14.922	19.421	1.142
198.765	15.182	19.425	1.161
199.48	15.755	19.815	1.184
200.195	15.379	19.431	1.169
200.91	15.397	19.344	1.153
201.625	15.67	19.361	1.184
202.34	15.348	20.688	1.171
203.055	15.784	19.78	1.203
203.77	15.564	19.099	1.162
204.485	15.694	19.397	1.164
205.2	15.046	19.107	1.124
205.915	15.845	19.37	1.197
206.63	16.188	19.729	1.17
207.345	15.684	19.213	1.186
208.06	15.977	19.594	1.176
208.775	15.735	19.515	1.19
209.49	16.355	20.498	1.201
210.205	16.216	19.969	1.192
210.92	15.48	19.762	1.203
211.634	15.487	19.543	1.142
212.349	15.894	19.045	1.176
213.064	15.408	20.199	1.215
213.779	15.102	19.452	1.183
214.494	15.808	20.232	1.221
215.209	15.445	19.697	1.231
215.924	15.404	19.481	1.201
216.639	15.362	19.373	1.184
217.354	14.917	19.86	1.221
218.069	15.173	20.036	1.216
218.784	14.955	19.571	1.213
219.499	14.776	19.257	1.197
220.214	15.099	19.474	1.2
220.929	14.628	19.493	1.215
221.644	15.452	20.217	1.221
222.359	14.956	19.291	1.214
223.074	14.708	20.305	1.246
223.789	15.282	20.336	1.229
224.504	15.345	20.281	1.267
225.219	15.683	20.008	1.253
225.934	15.892	20.384	1.295
226.649	16.019	20.733	1.261
227.364	15.519	19.769	1.219
228.079	16.2	20.863	1.277
228.794	16.48	21.6	1.294
229.509	16.583	20.938	1.271
230.224	16.945	21.103	1.3
230.939	15.967	23.569	1.317
231.654	14.787	18.925	1.238
232.369	16.012	20.868	1.305
233.084	16.065	21.499	1.31
233.799	15.557	20.834	1.251
234.514	15.38	20.879	1.303
235.229	15.578	21.372	1.286
235.944	15.618	21.56	1.319
236.659	15.655	21.556	1.255
237.374	15.11	21.305	1.271
238.089	15.043	22.022	1.275
238.804	14.481	20.955	1.252
239.519	14.817	21.085	1.265
240.234	14.967	20.749	1.236
240.949	14.703	21.29	1.264
241.664	14.69	23.557	1.273
242.379	14.419	21.665	1.218
243.094	14.98	22.553	1.299
243.809	15.635	22.102	1.349
244.524	15.082	21.761	1.26
245.239	14.854	21.502	1.249
245.954	15.716	21.411	1.253
246.669	15.504	21.96	1.303
247.384	15.551	21.285	1.253
248.099	15.638	21.737	1.272
248.814	15.519	21.902	1.249
249.529	15.555	21.713	1.282
250.244	15.21	21.619	1.262
250.959	15.522	22.222	1.304
251.674	15.178	25.759	1.275
252.388	15.212	21.1	1.233
253.103	15.558	21.628	1.277
253.818	15.409	21.456	1.224
254.533	14.881	21.222	1.26
255.248	15.031	20.866	1.253
255.963	15.452	22.747	1.245
256.678	14.528	20.351	1.207
257.393	14.698	21.242	1.253
258.108	14.719	21.725	1.255
258.823	14.787	21.381	1.286
259.538	14.504	20.942	1.251
260.253	14.919	21.544	1.257
260.968	14.663	21.042	1.204
261.683	14.95	22.02	1.263
262.398	15.074	21.985	1.403
263.113	14.598	21.128	1.205
263.828	14.874	21.293	1.21
264.543	14.429	20.668	1.281
265.258	14.232	20.714	1.193
265.973	14.89	21.623	1.231
266.688	14.375	20.775	1.217
267.403	14.17	20.382	1.203
268.118	14.415	20.604	1.191
268.833	14.242	20.338	1.168
269.548	14.375	21.341	1.193
270.263	13.611	19.436	1.11
270.978	14.241	20.86	1.181
271.693	15.045	21.099	1.188
272.408	14.467	20.652	1.168
273.123	14.641	20.604	1.189
273.838	15.05	20.952	1.178
274.553	15.169	20.751	1.17
275.268	15.006	21.261	1.18
275.983	15.028	21.518	1.166
276.698	14.711	20.316	1.174
277.413	15.291	21.099	1.16
278.128	14.977	20.289	1.169
278.843	14.833	20.004	1.151
279.558	14.894	20.276	1.157
280.273	14.834	20.932	1.146
280.988	15.126	20.544	1.159
281.703	14.693	19.825	1.121
282.418	15.013	20.003	1.156
283.133	14.999	19.943	1.136
283.848	15.001	20.331	1.127
284.563	16.022	20.164	1.137
285.278	15.601	20.017	1.144
285.993	15.469	20.688	1.157
286.708	15.248	19.623	1.108
287.423	15.144	20.685	1.139
288.138	15.264	19.853	1.104
288.853	15.517	19.783	1.124
289.568	15.08	20.032	1.17
290.283	14.992	19.571	1.102
290.998	15.123	19.677	1.126
291.713	15.279	19.442	1.115
292.428	14.558	19.482	1.063
293.142	15.354	19.785	1.152
293.857	15.498	19.707	1.104
294.572	15.24	19.952	1.112
295.287	15.277	19.814	1.119
296.002	14.88	20.203	1.098
296.717	15.24	19.946	1.159
297.432	14.668	19.254	1.095
298.147	15.419	19.873	1.118
298.862	15.319	19.834	1.133
299.577	15.275	20.106	1.125
300.292	15.239	20.418	1.138
301.007	14.976	19.392	1.129
301.722	14.886	20.06	1.151
302.437	14.465	20.039	1.132
303.152	14.753	20.45	1.147
303.867	14.371	19.973	1.149
304.582	14.026	19.348	1.12
305.297	14.195	19.654	1.141
306.012	14.344	20.314	1.175
306.727	14.571	20.349	1.167
307.442	15.183	19.803	1.13
308.157	14.727	20.021	1.164
308.872	14.886	20.278	1.15
309.587	14.573	19.869	1.122
310.302	14.399	20.013	1.154
311.017	14.503	20.093	1.128
311.732	14.833	20.087	1.148
312.447	14.04	18.731	1.08
313.162	14.288	19.906	1.152
313.877	14.611	20.163	1.145
314.592	14.404	20.174	1.121
315.307	14.454	20.401	1.135
316.022	13.573	19.055	1.075
316.737	14.467	20.244	1.121
317.452	14.563	20.197	1.113
318.167	14.21	20.034	1.086
318.882	14.569	20.737	1.11
319.597	14.467	20.646	1.121
320.312	14.248	19.99	1.091
321.027	14.875	20.225	1.106
321.742	14.629	20.677	1.115
322.457	14.453	21.493	1.1
323.172	14.115	19.591	1.042
323.887	14.473	20.338	1.078
324.602	14.471	22.07	1.116
325.317	14.704	20.018	1.089
326.032	14.578	19.905	1.082
326.747	14.626	20.591	1.128
327.462	14.434	19.629	1.04
328.177	13.998	20.073	1.076
328.892	13.935	19.717	1.056
329.607	13.956	19.335	1.074
330.322	13.736	19.502	1.087
331.037	13.699	19.805	1.087
331.752	13.581	19.26	1.045
332.467	13.553	20.105	1.085
333.182	14.107	19.452	1.054
333.896	13.394	19.653	1.08
334.611	14.108	20.335	1.141
335.326	13.729	19.635	1.087
336.041	13.581	19.299	1.079
336.756	14.284	20.381	1.108
337.471	13.499	19.529	1.08
338.186	13.733	19.234	1.095
338.901	13.668	19.251	1.097
339.616	13.952	22.135	1.082
340.331	13.862	19.492	1.133
341.046	14.107	19.328	1.116
341.761	14.119	19.339	1.166
342.476	13.717	19.351	1.145
343.191	14.204	19.768	1.149
343.906	13.502	18.269	1.067
344.621	13.591	18.766	1.107
345.336	13.653	18.679	1.133
346.051	14.392	18.794	1.162
346.766	13.685	18.913	1.144
347.481	13.73	19.15	1.144
348.196	13.577	19.13	1.146
348.911	13.469	18.806	1.126
349.626	13.778	19.125	1.179
350.341	13.405	18.377	1.169
351.056	13.248	18.538	1.114
351.771	14.226	19.08	1.167
352.486	13.562	18.766	1.139
353.201	13.511	19.185	1.174
353.916	12.857	17.89	1.139
354.631	13.119	18.63	1.187
355.346	13.475	19.215	1.172
356.061	13.782	19.013	1.151
356.776	13.557	19.92	1.177
357.491	12.927	18.369	1.121
358.206	12.919	18.972	1.133
358.921	12.903	19.44	1.135
359.636	13.398	20.819	1.181
360.351	13.074	19.967	1.168
361.066	12.883	18.933	1.143
361.781	13.457	18.518	1.122
362.496	12.836	19.001	1.123
363.211	13.641	18.666	1.134
363.926	13.001	19.117	1.116
364.641	12.498	18.484	1.096
365.356	12.836	18.568	1.099
366.071	13.297	19.338	1.141
366.786	12.669	18.836	1.087
367.501	12.885	19.347	1.136
368.216	12.743	19.3	1.131
368.931	12.971	18.743	1.141
369.646	13.145	19.134	1.123
370.361	12.915	19.258	1.129
371.076	12.673	18.857	1.149
371.791	12.928	18.984	1.104
372.506	13.005	19.052	1.132
373.221	13.693	20.37	1.136
373.936	13.574	19.349	1.152
374.651	13.432	18.919	1.115
375.365	13.84	18.828	1.117
376.08	13.288	18.725	1.117
376.795	13.807	19.654	1.15
377.51	14.537	19.214	1.117
378.225	14.166	19.427	1.172
378.94	14.215	19.451	1.126
379.655	13.824	19.866	1.126
380.37	14.352	20.65	1.172
381.085	13.703	18.516	1.082
381.8	14.508	19.98	1.154
382.515	14.4	19.496	1.132
383.23	13.825	18.847	1.102
383.945	14.655	19.399	1.172
384.66	14.265	19.004	1.157
385.375	14.951	19.393	1.152
386.09	14.212	19.691	1.155
386.805	14.23	19.223	1.145
387.52	14.715	19.004	1.189
388.235	14.091	19.298	1.16
388.95	13.925	19.502	1.157
389.665	14.214	19.166	1.167
390.38	14.202	19.652	1.173
391.095	13.926	18.994	1.144
391.81	14.286	19.449	1.154
392.525	14.229	18.896	1.156
393.24	14.554	19.444	1.177
393.955	14.238	19.655	1.167
394.67	14.488	18.573	1.131
395.385	14.138	18.813	1.17
396.1	14.598	19.611	1.191
396.815	14.415	19.052	1.169
397.53	14.343	18.952	1.146
398.245	15.104	19.625	1.175
398.96	15.511	19.769	1.215
399.675	14.942	19.143	1.144
400.39	15.834	19.451	1.182
401.105	15.98	19.148	1.165
401.82	16.166	19.122	1.155
402.535	16.372	19.84	1.175
403.25	16.747	19.471	1.205
403.965	17.067	19.435	1.197
404.68	16.944	19.016	1.174
405.395	17.347	19.557	1.197
406.11	17.397	19.185	1.18
406.825	17.344	19.036	1.201
407.54	17.293	18.867	1.185
408.255	17.683	18.992	1.186
408.97	17.244	18.407	1.176
409.685	17.701	18.553	1.216
410.4	17.596	18.364	1.194
411.115	17.54	18.513	1.189
411.83	18.223	18.192	1.191
412.545	17.217	17.951	1.152
413.26	17.661	18.867	1.158
413.975	17.225	18.064	1.139
414.69	18.064	18.404	1.192
415.404	18.247	18.367	1.187
416.119	18.153	18.672	1.176
416.834	18.114	18.203	1.164
417.549	17.97	18.661	1.187
418.264	17.676	17.977	1.163
418.979	18.164	18.278	1.164
419.694	18.462	18.183	1.16
420.409	19.174	18.262	1.169
421.124	18.51	17.956	1.168
421.839	18.734	17.735	1.16
422.554	18.338	17.506	1.189
423.269	19.095	17.696	1.162
423.984	19.074	17.658	1.171
424.699	19.142	17.69	1.19
425.414	19.669	18.017	1.194
426.129	19.039	17.467	1.212
426.844	19.276	17.722	1.177
427.559	19.377	17.955	1.21
428.274	19.141	17.9	1.237
428.989	19.303	18.16	1.198
429.704	19.588	18.061	1.217
430.419	18.927	17.849	1.226
431.134	19.662	18.474	1.237
431.849	19.695	18.271	1.222
432.564	18.5	18.14	1.237
433.279	20.111	18.126	1.236
433.994	19.64	18.86	1.215
434.709	20.216	18.327	1.246
435.424	20.243	18.632	1.27
436.139	19.215	18.322	1.221
436.854	19.888	18.661	1.228
437.569	19.151	18.469	1.214
438.284	19.775	18.256	1.203
438.999	19.743	18.574	1.249
439.714	19.656	18.901	1.242
440.429	18.799	18.891	1.198
441.144	18.765	18.568	1.224
441.859	18.667	18.617	1.207
442.574	18.758	18.518	1.205
443.289	17.849	18.254	1.19
444.004	18.139	18.538	1.235
444.719	17.369	17.926	1.208
445.434	17.812	18.047	1.178
446.149	17.869	18.582	1.214
446.864	17.502	18.025	1.195
447.579	17.893	18.274	1.275
448.294	17.432	18.44	1.207
449.009	17.96	18.051	1.223
449.724	17.601	18.222	1.246
450.439	18.028	18.417	1.24
451.154	16.725	17.789	1.224
451.869	17.703	18.132	1.242
452.584	16.896	18.37	1.223
453.299	16.692	17.961	1.232
454.014	16.934	17.99	1.247
454.729	16.503	19.163	1.277
455.444	16.29	17.48	1.21
456.159	17.084	18.419	1.281
456.873	17.104	18.744	1.277
457.588	17.363	18.154	1.347
458.303	17.599	18.061	1.303
459.018	17.822	18.171	1.304
459.733	18.047	17.478	1.294
460.448	18.413	18.1	1.275
461.163	17.399	17.37	1.218
461.878	18.917	18.335	1.335
462.593	18.61	18.243	1.289
463.308	19.957	18.142	1.344
464.023	20.187	18.157	1.338
464.738	20.209	18.27	1.351
465.453	20.088	18.331	1.298
466.168	20.076	17.886	1.294
466.883	20.753	18.843	1.298
467.598	21.166	18.676	1.356
468.313	21.156	18.281	1.302
469.028	20.282	18.105	1.296
469.743	19.888	18.288	1.227
470.458	20.575	18.352	1.284
471.173	20.07	17.214	1.17
471.888	20.074	18.209	1.261
472.603	20.215	18.546	1.22
473.318	19.749	18.404	1.232
474.033	18.316	18.854	1.162
474.748	19.34	18.336	1.16
475.463	18.213	19.586	1.188
476.178	18.337	19.411	1.17
476.893	17.197	18.876	1.144
477.608	17.67	20.493	1.143
478.323	16.6	20.031	1.081
479.038	16.276	19.986	1.087
479.753	15.472	19.447	1.103
480.468	16.174	20.813	1.054
481.183	14.686	20.156	1.048
481.898	14.695	20.395	1.04
482.613	14.713	20.011	1.042
483.328	14.096	19.577	1.007
484.043	14.463	20.031	1.047
484.758	13.985	20.605	1.037
485.473	14.442	20.098	1.034
486.188	14.613	20.448	1.059
486.903	14.502	20.794	1.073
487.618	13.928	20.034	1.048
488.333	13.946	19.585	1.025
489.048	13.67	19.517	1.038
489.763	14.209	20.799	1.02
490.478	13.849	19.534	1.005
491.193	14.392	19.072	1.051
491.908	13.791	20.075	1.076
492.623	12.833	19.034	0.999
493.338	12.969	18.978	1.016
494.053	12.97	19.396	1.044
494.768	13.696	18.867	1.036
495.483	12.619	18.845	1.017
496.198	12.51	18.958	1.055
496.913	12.104	18.047	0.987
497.627	12.033	18.171	1.011
498.342	12.633	18.886	1.079
499.057	12.664	18.844	1.052
499.772	12.697	18.526	1.044
500.487	12.419	19.308	1.079
501.202	12.238	18.989	1.052
501.917	12.105	18.601	1.065
502.632	11.58	17.804	1.015
503.347	12.1	18.395	1.054
504.062	12.159	18.571	1.077
504.777	11.856	18.155	1.087
505.492	12.607	18.745	1.091
506.207	12.133	18.124	1.042
506.922	13.05	18.805	1.068
507.637	13.036	19.569	1.088
508.352	13.828	18.979	1.077
509.067	13.51	19.106	1.101
509.782	13.679	19.227	1.087
510.497	14.348	19.121	1.12
511.212	14.672	19.046	1.085
511.927	14.796	19.307	1.126
512.642	15.442	19.865	1.109
513.357	15.096	19.155	1.079
514.072	15.726	20.41	1.171
514.787	15.693	19.625	1.095
515.502	15.772	19.793	1.113
516.217	15.936	20.218	1.106
516.932	16.508	19.915	1.123
517.647	16.015	19.515	1.15
518.362	16.519	19.906	1.09
519.077	16.384	19.723	1.12
519.792	16.093	19.185	1.08
520.507	17.018	19.92	1.151
521.222	16.153	19.113	1.059
521.937	16.684	20.348	1.113
522.652	16.68	20.502	1.096
523.367	15.923	19.693	1.13
524.082	16.088	19.704	1.22
524.797	17.345	19.736	1.139
525.512	15.7	20.384	1.099
526.227	15.891	19.958	1.124
526.942	15.564	20.389	1.095
527.657	15.478	20.259	1.11
528.372	14.944	19.124	1.041
529.087	15.141	20.524	1.096
529.802	15.022	20.425	1.085
530.517	15.051	20.621	1.074
531.232	15.364	20.991	1.109
531.947	14.536	20.883	1.075
532.662	15.468	21.336	1.104
533.377	14.542	20.929	1.069
534.092	14.225	20.945	1.069
534.807	14.503	21.473	1.146
535.522	15.031	21.569	1.135
536.237	15.547	23.203	1.155
536.952	14.669	20.977	1.106
537.667	14.458	20.632	1.086
538.381	14.11	20.897	1.083
539.096	14.951	21.533	1.136
539.811	15.334	21.201	1.147
540.526	14.904	21.91	1.144
541.241	14.56	19.503	1.034
541.956	14.456	20.881	1.1
542.671	14.701	20.769	1.129
543.386	14.949	21.176	1.129
544.101	15.179	21.142	1.151
544.816	15.346	21.703	1.207
545.531	14.956	21.464	1.135
546.246	14.577	21.446	1.139
546.961	14.817	21.206	1.126
547.676	15.037	22.453	1.131
548.391	14.777	21.111	1.122
549.106	15.419	21.39	1.201
549.821	14.663	22.254	1.101
550.536	14.943	20.743	1.12
551.251	16.441	22.19	1.201
551.966	15.592	21.618	1.166
552.681	16.623	21.507	1.163
553.396	15.719	21.354	1.163
554.111	15.377	22.562	1.188
554.826	15.619	23.123	1.292
555.541	15.251	21.927	1.165
556.256	15.009	21.763	1.116
556.971	14.93	20.532	1.098
557.686	15.994	22.357	1.213
558.401	13.989	19.981	1.079
559.116	14.927	20.8	1.159
559.831	14.955	21.133	1.167
560.546	14.836	21.308	1.148
561.261	14.789	20.955	1.163
561.976	14.625	20.64	1.118
562.691	14.25	20.712	1.121
563.406	14.825	20.579	1.145
564.121	14.866	22.709	1.18
564.836	15.145	21.77	1.158
565.551	14.653	21.056	1.087
566.266	14.788	21.436	1.166
566.981	14.606	21.488	1.163
567.696	14.742	21.378	1.141
568.411	14.435	22.392	1.148
569.126	14.713	20.382	1.121
569.841	14.165	20.864	1.117
570.556	14.692	21.154	1.144
571.271	14.52	22.436	1.208
571.986	14.127	20.887	1.142
572.701	14.76	21.457	1.197
573.416	14.273	21.241	1.137
574.131	14.208	21.29	1.209
574.846	13.716	19.628	1.07
575.561	14.274	20.657	1.117
576.276	14.38	20.995	1.126
576.991	14.399	21.448	1.181
577.706	14.544	21.436	1.119
578.421	14.096	20.32	1.144
579.135	13.958	21.33	1.142
579.85	14.357	20.871	1.17
580.565	14.609	20.787	1.122
581.28	14.657	21.152	1.152
581.995	14.737	20.747	1.172
582.71	15.028	21.968	1.124
583.425	14.866	20.215	1.121
584.14	15.507	20.815	1.162
584.855	15.25	21.281	1.141
585.57	15.517	20.915	1.137
586.285	14.995	21.013	1.152
587	15.326	22.24	1.129
587.715	15.744	20.858	1.133
588.43	15.278	21.011	1.16
589.145	16.151	20.9	1.139
589.86	15.76	21.13	1.128
590.575	15.451	19.856	1.161
591.29	15.352	20.148	1.121
592.005	16.499	21.939	1.119
592.72	15.88	20.315	1.106
593.435	16.156	20.494	1.144
594.15	15.79	19.82	1.112
594.865	15.919	20.696	1.145
595.58	15.863	20.559	1.11
596.295	16.134	20.18	1.159
597.01	15.009	19.297	1.076
597.725	15.569	21.72	1.109
598.44	15.992	20.487	1.141
599.155	16.067	20.2	1.121
599.87	15.533	19.838	1.105
600.585	15.611	19.924	1.065
601.3	15.353	19.991	1.067
602.015	15.861	20.152	1.099
602.73	15.939	19.683	1.066
603.445	15.964	19.99	1.104
604.16	16.34	19.743	1.086
604.875	15.634	20.472	1.061
605.59	15.929	19.82	1.066
606.305	15.342	19.168	1.056
607.02	15.765	20.26	1.037
607.735	15.884	20.453	1.061
608.45	14.82	18.985	1.013
609.165	15.453	20.36	1.076
609.88	16.557	19.357	1.068
610.595	15.561	20.767	1.088
611.31	16.418	19.416	1.074
612.025	16.181	19.538	1.087
612.74	13.769	18.104	0.978
613.455	14.533	19.5	1.038
614.17	14.571	19.467	1.095
614.885	15.354	20.418	1.048
615.6	14.091	18.957	1.004
616.315	14.778	20.168	1.081
617.03	15.033	19.924	1.094
617.745	14.155	19.702	1.045
618.46	13.746	19.022	1.078
619.175	14.741	19.556	1.081
619.889	14.31	18.946	1.027
620.604	14.455	21.256	1.05
621.319	14.631	19.55	1.093
622.034	14.871	19.259	1.065
622.749	14.828	20.121	1.096
623.464	14.564	19.566	1.089
624.179	14.567	19.503	1.139
624.894	15.24	19.23	1.107
625.609	15.024	20.08	1.127
626.324	15.1	20.495	1.109
627.039	14.579	20.19	1.122
627.754	14.614	19.974	1.105
628.469	14.438	19.736	1.108
629.184	14.432	19.776	1.111
629.899	14.412	20.113	1.128
630.614	14.666	20.193	1.104
631.329	14.351	19.903	1.08
632.044	13.759	19.904	1.078
632.759	14.259	19.788	1.094
633.474	14.503	19.383	1.107
634.189	14.115	19.326	1.118
634.904	14.335	19.507	1.132
635.619	14.387	19.639	1.127
636.334	13.916	19.832	1.082
637.049	14.477	19.363	1.148
637.764	14.004	20.857	1.104
638.479	14.043	20.238	1.122
639.194	13.577	21.048	1.124
639.909	13.38	20.182	1.139
640.624	13.54	19.349	1.062
641.339	13.653	19.531	1.099
642.054	13.899	20.367	1.12
642.769	14.352	20.691	1.133
643.484	13.425	20.274	1.089
644.199	13.656	21.835	1.135
644.914	13.458	20.256	1.084
645.629	13.362	20.201	1.173
646.344	13.164	20.422	1.121
647.059	13.156	20.113	1.098
647.774	12.74	20.56	1.103
648.489	12.128	19.227	1.028
649.204	12.534	19.874	1.075
649.919	12.544	20.406	1.039
650.634	13.152	20.594	1.163
651.349	12.501	20.447	1.1
652.064	12.792	20.495	1.073
652.779	12.922	20.251	1.069
653.494	12.402	20.144	1.048
654.209	12.53	20.181	1.025
654.924	12.369	20.017	1.099
655.639	12.514	20.658	1.058
656.354	13.153	21.495	1.088
657.069	12.742	20.242	1.098
657.784	12.413	20.612	1.05
658.499	12.941	20.923	1.071
659.214	12.523	20.229	1.071
659.929	13.171	21.17	1.087
660.643	12.738	21.894	1.085
661.358	11.549	19.492	1.012
662.073	12.634	19.984	1.067
662.788	12.292	20.71	1.051
663.503	13.325	20.564	1.069
664.218	13.011	20.152	1.076
664.933	12.669	19.816	1.037
665.648	13.296	21.16	1.09
666.363	13.313	19.977	1.036
667.078	13.481	20.199	1.088
667.793	13.613	19.853	1.075
668.508	13.446	20.487	1.096
669.223	14.074	19.916	1.084
669.938	13.727	19.765	1.059
670.653	14.004	20.595	1.085
671.368	14.003	20.016	1.101
672.083	13.557	19.633	1.052
672.798	12.991	18.758	1.023
673.513	13.431	19.166	1.077
674.228	13.989	19.814	1.065
674.943	15.123	19.517	1.094
675.658	13.919	19.053	1.095
676.373	13.857	19.463	1.078
677.088	14.088	19.746	1.117
677.803	14.82	19.871	1.104
678.518	14.133	19.207	1.1
679.233	14.394	19.285	1.099
679.948	14.238	20.214	1.088
680.663	14.854	19.46	1.08
681.378	14.06	19.76	1.094
682.093	14.284	19.269	1.088
682.808	13.784	18.538	1.106
683.523	13.933	18.703	1.1
684.238	13.846	19.858	1.096
684.953	14.251	18.748	1.048
685.668	13.849	18.981	1.059
686.383	14.316	19.583	1.109
687.098	13.518	18.72	1.043
687.813	13.194	18.456	0.994
688.528	13.966	19.047	1.108
689.243	13.799	19.987	1.082
689.958	14.379	19.111	1.069
690.673	14.443	18.698	1.121
691.388	13.901	18.986	1.075
692.103	13.378	18.564	1.058
692.818	14.061	19.385	1.08
693.533	13.942	19.221	1.087
694.248	13.75	18.487	1.048
694.963	12.86	17.466	0.979
695.678	13.519	19	1.033
696.393	14.241	18.592	1.032
697.108	13.838	18.78	1.054
697.823	13.404	18.978	1.038
698.538	13.97	18.957	1.033
699.253	13.692	20.507	1.007
699.968	13.941	18.846	1.079
700.683	13.999	19.15	1.031
701.397	14.021	18.721	1.054
702.112	13.677	18.412	1.032
702.827	14.153	19.425	1.008
703.542	13.315	18.473	0.99
704.257	14.1	17.893	0.98
704.972	14.604	18.946	1.061
705.687	12.796	17.245	0.93
706.402	14.411	19.56	1.064
707.117	14.348	19.216	1.031
707.832	14.473	19.769	1.012
708.547	14.489	18.543	0.989
709.262	14.75	19.074	1.054
709.977	15.119	18.924	0.998
710.692	14.62	18.955	1.038
711.407	14.367	18.251	0.997
712.122	14.723	18.137	1.027
712.837	14.374	19.826	1.006
713.552	14.201	18.928	0.983
714.267	13.764	17.465	0.973
714.982	14.828	18.749	1.02
715.697	14.613	18.065	1.002
716.412	14.5	17.974	1.011
717.127	13.457	16.856	0.968
717.842	13.92	17.11	0.941
718.557	15.018	18.022	1.018
719.272	14.634	18.184	1.035
719.987	14.881	18.474	1.021
720.702	14.772	17.503	0.994
721.417	13.76	17.083	0.947
722.132	14.519	17.629	1.096
722.847	14.542	17.762	1.029
723.562	14.014	17.589	0.976
724.277	15.142	17.59	1.021
724.992	14.259	17.31	1.012
725.707	14.843	17.199	0.997
726.422	14.175	17.29	1.041
727.137	15.393	18.711	1.065
727.852	14.847	17.674	1.02
728.567	14.113	17.647	1.029
729.282	14.089	17.1	0.99
729.997	13.13	16.765	0.956
730.712	14.852	17.603	1.006
731.427	14.132	18.332	0.991
732.142	14.312	18.281	1.042
732.857	14.167	17.029	0.975
733.572	15.319	17.998	0.987
734.287	14.399	17.553	1.006
735.002	14.495	17.596	1.045
735.717	13.568	16.792	0.974
736.432	14.109	17.866	1.05
737.147	13.035	16.321	0.939
737.862	14.514	17.879	1.064
738.577	14.079	17.492	1.018
739.292	14.051	17.862	1.093
740.007	13.593	17.14	0.968
740.722	14.069	18.174	1.001
741.437	13.704	17.084	1.061
742.151	14.003	17.314	0.995
742.866	13.923	17.025	1.011
743.581	14.026	17.344	1.043
744.296	13.753	17.09	1.01
745.011	13.5	17.307	1.016
745.726	14.028	17.899	1.01
746.441	13.701	16.606	0.989
747.156	14.442	17.448	1.112
747.871	13.932	17.506	1.042
748.586	13.401	17.32	0.963
749.301	14.142	17.942	1.055
750.016	13.53	17.115	1.009
750.731	13.747	17.865	1.001
751.446	13.713	17.724	1.006
752.161	13.141	17.451	1.044
752.876	13.469	17.541	1.006
753.591	13.462	17.869	1.007
754.306	13.797	17.765	1.018
755.021	13.74	17.076	1.023
755.736	13.129	16.954	1.014
756.451	13.689	18.703	1.003
757.166	13.577	17.13	0.979
757.881	13.231	17.879	0.996
758.596	12.716	16.774	0.966
759.311	13.876	18.048	0.989
760.026	13.308	17.757	1.018
760.741	12.962	17.026	1.054
761.456	13.686	17.868	1.067
762.171	13.332	18.024	1.01
762.886	12.641	17.313	0.965
763.601	13.037	18.053	0.967
764.316	12.844	17.373	0.975
765.031	13.287	18.173	1.019
765.746	13.467	17.751	0.998
766.461	13.722	17.258	1.009
767.176	13.217	17.619	1.004
767.891	13.038	18.396	1.001
768.606	12.651	16.999	0.992
769.321	12.656	17.519	0.988
770.036	11.871	16.168	0.927
770.751	12.882	17.326	1.012
771.466	13.24	17.691	1.005
772.181	12.929	17.783	1.009
772.896	13.268	18.345	0.995
773.611	12.611	17.197	0.986
774.326	13.09	17.748	0.986
775.041	13.638	18.054	1.027
775.756	13.371	17.878	1.038
776.471	12.997	18.203	1.006
777.186	12.5	17.618	0.967
777.901	12.847	17.687	1.005
778.616	12.999	17.548	1.012
779.331	12.207	17.517	0.922
780.046	12.641	16.986	0.962
780.761	12.573	17.332	0.946
781.476	13.68	18.743	1.013
782.191	13.515	17.514	1.021
782.905	13.097	17.505	1.006
783.62	13.102	17.495	1.01
784.335	12.239	16.909	0.936
785.05	13.532	17.616	1.017
785.765	13.796	17.297	1.009
786.48	13.262	16.032	0.931
787.195	13.257	17.666	1.024
787.91	13.362	17.15	1.11
788.625	13.256	17.679	0.994
789.34	12.698	16.207	0.972
790.055	13.626	18.532	1.037
790.77	13.887	17.045	1.049
791.485	13.036	17.152	1
792.2	14.031	19.626	1.085
792.915	13.516	17.296	1.088
793.63	13.258	16.892	1.004
794.345	13.204	17.841	1.014
795.06	12.993	17.074	1.003
795.775	13.587	17.728	1.012
796.49	13.113	16.791	0.994
797.205	13.294	16.841	0.975
797.92	13.571	17.358	1.045
798.635	12.798	17.105	0.965
799.35	13.751	17.036	1.033
800.065	13.574	17.225	1.034
800.78	14.021	17.504	1.036
801.495	13.9	17.857	1.054
802.21	13.796	17.318	1.09
802.925	13.8	17.434	1.081
803.64	14.062	17.852	1.026
804.355	13.463	17.871	1.032
805.07	13.538	17.762	1.112
805.785	13.247	17.172	1.049
806.5	13.783	17.559	1.037
807.215	13.423	17.259	1.011
807.93	14.222	17.804	1.06
808.645	13.525	17.395	1.022
809.36	13.304	17.357	1.083
810.075	13.294	18.401	1.055
810.79	13.365	17.681	1.042
811.505	13.811	18.134	1.025
812.22	13.693	18.485	1.024
812.935	13.472	18.342	1.066
813.65	13.876	17.614	1.054
814.365	13.74	18.314	1.078
815.08	14.65	18.576	1.069
815.795	13.811	17.727	1.023
816.51	13.275	17.541	1.013
817.225	13.738	17.944	1.028
817.94	13.65	17.537	1.056
818.655	13.383	17.11	1.001
819.37	14.22	17.996	1.036
820.085	14.598	19.044	1.023
820.8	13.358	17.517	1.026
821.515	14.809	18.437	1.041
822.23	14.233	18.196	1.056
822.944	14.134	18.731	1.049
823.659	13.885	18.745	1.072
824.374	14.125	18.23	1.05
825.089	14.059	17.913	1.002
825.804	14.31	19.287	1.064
826.519	14.126	18.415	1.043
827.234	13.485	16.945	0.959
827.949	15.28	19.658	1.027
828.664	14.175	17.949	0.999
829.379	14.237	18.057	0.989
830.094	14.679	18.354	1.027
830.809	15.27	19.987	1.055
831.524	14.756	19.184	1.026
832.239	14.963	18.78	1.052
832.954	14.567	17.952	1.023
833.669	15.036	18.961	1.012
834.384	15.23	18.89	1.017
835.099	14.81	18.211	0.998
835.814	14.996	18.694	0.978
836.529	15.173	18.786	1.134
837.244	15.129	18.024	0.999
837.959	14.624	18.809	0.962
838.674	15.531	17.92	1.005
839.389	14.832	18.083	0.981
840.104	14.506	18.534	1.031
840.819	15.019	18.976	1.018
841.534	14.632	18.956	1.017
842.249	14.482	20.246	1.06
842.964	14.38	19.113	0.993
843.679	15.079	17.796	1.012
844.394	15.382	18.709	1.129
845.109	14.132	18.375	0.976
845.824	14.547	17.701	1.007
846.539	13.895	18.984	1.089
847.254	14.928	18.47	1.081
847.969	14.057	17.408	1.008
848.684	15.708	19.008	1.047
849.399	14.252	18.055	1.055
850.114	13.937	17.993	1.017
850.829	14.073	18.075	1.096
851.544	14.007	17.037	1.036
852.259	14.096	18.399	1.042
852.974	15.877	17.955	1.05
853.689	15.115	19.699	1.018
854.404	13.392	19.088	1.07
855.119	14.214	18.842	1.05
855.834	12.577	15.571	0.904
856.549	14.321	18.178	1.152
857.264	13.802	18.371	1.035
857.979	14.492	19.131	1.105
858.694	14.226	18.089	1.052
859.409	13.592	18.287	1.065
860.124	13.904	18.158	1.102
860.839	13.292	17.085	1.063
861.554	14.355	18.027	1.043
862.269	13.775	17.009	0.983
862.984	13.732	18.293	1.044
863.699	14.114	18.335	1.112
864.413	13.432	20.041	1.1
865.128	13.006	17.869	1.12
865.843	13.438	17.918	1.044
866.558	13.537	17.595	1.055
867.273	13.292	17.62	1.025
867.988	12.742	17.577	1.019
868.703	13.745	17.77	1.105
869.418	13.574	18.012	1.046
870.133	13.06	17.476	0.985
870.848	13.461	18.292	1.147
871.563	14.389	18.707	1.06
872.278	13.711	19.279	1.081
872.993	14.151	18.238	0.998
873.708	14.72	19.143	1.097
874.423	14.223	18.76	1.06
875.138	13.964	19.418	1.059
875.853	13.905	18.206	1.028
876.568	14.039	19.402	1.062
877.283	13.713	19.002	1.062
877.998	14.472	18.418	1.017
878.713	14.226	18.86	1.055
879.428	14.376	18.516	1.036
880.143	14.35	18.192	1.012
880.858	14.479	18.6	1.087
881.573	15.694	18.913	1.121
882.288	14.47	19.059	1.088
883.003	14.548	18.703	1.09
883.718	14.279	18.606	1.044
884.433	14.682	18.559	1.162
885.148	15.406	18.797	1.042
885.863	14.517	19.534	1.058
886.578	14.279	18.901	1.048
887.293	15.256	18.893	1.089
888.008	15.591	19.192	1.086
888.723	14.575	18.668	1.082
889.438	13.873	19.324	1.013
890.153	14.073	18.343	1.086
890.868	14.449	18.887	1.111
891.583	15.2	19.205	1.128
892.298	14.458	18.03	0.981
893.013	16.43	19.298	1.088
893.728	14.962	18.88	1.063
[truncated: 1,437 more rows]
